# Supplementary material for: DNA-PKcs inhibition sensitizes glioblastoma to radiotherapy through reprogramming of tumor cell states and immune microenvironment cell types
Source: Research Square preprint supplement (doi:10.21203/rs.3.rs-9657955/v1), 2026-06-05
Supplement: Supplementary file 2 [file 51ae12eef3211731e069e04f.xlsx]

## Sheet: Supplementary_Table_1
Supplementary Table 1. CRISPRi screen results across cultured glioblastoma cell lines.
LN18													SB28												GL261
sgRNA_pair	gene	growth_pval	growth_neglogpval	growth_enrichment	growth_combined_score	rad_pval	rad_neglogpval	rad_enrichment	rad_combined_score	is_hit_growth	is_hit_rad		gene	growth_pval	growth_neglogpval	growth_enrichment	growth_combined_score	rad_pval	rad_neglogpval	rad_enrichment	rad_combined_score	is_hit_growth	is_hit_rad		gene	growth_neglogpval	growth_enrichment	growth_combined_score	rad_neglogpval	rad_enrichment	rad_combined_score	is_hit_growth	is_hit_rad
A1BG_-_58864840.23-P2|A1BG_-_58864822.23-P2	A1BG	0.524907	0.279917	0.0807917	0.0526115	0.0879096	1.05596	0.344077	0.965902	False	False		0610007P14Rik	0.338619	0.470289	-0.14694	0.228487	0.435571	0.360941	-0.392146	0.34711	False	False		2010005H15Rik	0.332519	0.0328547	0.20353	0.949561	-0.208065	1.66135	False	False
A1BG_+_58858964.23-P1|A1BG_-_58858788.23-P1	A1BG	0.0652902	1.18515	-0.485819	1.33947	0.006666	2.17613	0.939821	5.437	False	False		0610009B22Rik	0.0563871	1.24882	-0.768602	3.17365	0.231937	0.63463	0.840989	1.30887	False	False		2200002D01Rik	0.35796	-0.0177951	0.118672	0.4268	0.0363049	0.130295	False	False
A1CF_+_52645339.23-P1P2|A1CF_-_52645373.23-P1P2	A1CF	0.584035	0.233561	-0.334578	0.181795	0.262188	0.581388	-0.173721	0.268501	False	False		0610009D07Rik	0.10436	0.981467	-2.17484	7.05765	0.337036	0.472324	-0.543643	0.629705	False	False		2210010C04Rik	0.0940309	0.00858595	0.0150409	0.498086	-0.0691111	0.289461	False	False
A2M_+_9268487.23-P1P2|A2M_+_9268495.23-P1P2	A2M	0.29274	0.533518	0.0792801	0.0984004	0.664776	0.177324	-0.218048	0.10279	False	False		0610009O20Rik	0.826051	0.0829933	0.103426	0.0283811	0.385115	0.414409	-0.121802	0.123785	False	False		2210018M11Rik	1.13939	-0.18769	3.98409	0.171506	-0.0543127	0.0783282	False	False
A2ML1_+_8975211.23-P1P2|A2ML1_-_8975593.23-P1P2	A2ML1	0.00354895	2.4499	0.433047	2.46812	0.191521	0.717783	-0.233386	0.445345	False	False		0610010F05Rik	0.923652	0.0344914	-0.0292654	0.00333751	0.711512	0.147818	0.23124	0.0838252	False	False		2300002M23Rik	0.334199	-0.0499545	0.311024	0.484274	-0.0775747	0.3159	False	False
A3GALT2_+_33786659.23-ENST00000442999.3|A3GALT2_+_33786649.23-ENST00000442999.3	A3GALT2	0.672854	0.172079	-0.310536	0.124315	0.653564	0.184712	-0.236294	0.116031	False	False		0610010K14Rik	0.000130544	3.88424	-2.33032	29.9281	0.324986	0.488135	-0.352819	0.422353	True	False		2310003H01Rik	0.510589	-0.0713468	0.678672	0.117306	-0.167657	0.165379	False	False
A4GALT_-_43116819.23-P1P2|A4GALT_+_43116792.23-P1P2	A4GALT	0.134814	0.870264	0.237905	0.481657	0.856107	0.0674721	-0.111635	0.0200241	False	False		0610011F06Rik	0.809814	0.0916146	-0.231983	0.0702714	0.968061	0.0140973	0.17083	0.00590587	False	False		2310011J03Rik	0.410789	0.0179281	0.137204	1.10328	-0.231139	2.14435	False	False
A4GNT_+_137851178.23-P1P2|A4GNT_-_137851117.23-P1P2	A4GNT	0.00281598	2.55037	0.195074	1.15741	0.651084	0.186363	-0.0943981	0.0467683	False	False		0610012H03Rik	0.464117	0.333373	0.16448	0.181301	0.0583827	1.23372	-0.747958	2.26296	False	False		2310044G17Rik	0.0102866	-0.0160134	0.00306883	0.163093	-0.0375242	0.0514619	False	False
AAAS_-_53715438.23-P1P2|AAAS_+_53715355.23-P1P2	AAAS	0.112548	0.948663	-0.948531	2.09338	0.254938	0.593565	-0.647549	1.02181	False	False		0610030E20Rik	0.673898	0.171406	-0.15392	0.0872325	0.02434	1.61368	0.863834	3.41847	False	False		2410016O06Rik	0.0283269	-0.0677327	0.0357447	0.0795184	0.0372582	0.0249131	False	False
AACS_+_125549983.23-P1P2|AACS_-_125550169.23-P1P2	AACS	0.181917	0.740126	-0.43976	0.757191	0.596318	0.224522	-0.236981	0.141449	False	False		0610031J06Rik	0.976432	0.0103581	-0.047838	0.00163837	0.682972	0.165597	-0.0409763	0.0166406	False	False		2610018G03Rik	0.116494	-0.0282252	0.061257	0.966933	0.186771	1.5186	False	False
AADAC_-_151531954.23-P1P2|AADAC_-_151531939.23-P1P2	AADAC	0.646629	0.189345	0.0968654	0.0426684	0.0820257	1.08605	-0.498438	1.43909	False	False		0610037L13Rik	0.198376	0.702511	-0.389439	0.904586	0.589073	0.229831	0.135988	0.0766464	False	False		2700049A03Rik	0.0459508	-0.0173609	0.0148621	0.470614	0.238181	0.94256	False	False
AADACL2_+_151451732.23-P1P2|AADACL2_+_151452121.23-P1P2	AADACL2	0.160073	0.795683	0.312757	0.578935	0.327751	0.484456	0.220985	0.284607	False	False		0610040J01Rik	0.412276	0.384812	0.123158	0.156699	0.891532	0.0498631	0.0392141	0.00479519	False	False		2700050L05Rik	0.256972	-0.028675	0.137278	0.678152	-0.222863	1.27088	False	False
AADACL3_+_12776133.23-P1P2|AADACL3_+_12776213.23-P1P2	AADACL3	0.0437994	1.35853	0.107325	0.339199	0.28068	0.551788	-0.408327	0.598976	False	False		1100001G20Rik	0.00329883	2.48164	-0.823618	6.75806	0.0630843	1.20008	0.92648	2.72665	False	False		2810408M09Rik	0.193251	0.0136447	0.0491248	0.158925	-0.0299584	0.0400357	False	False
AADACL4_+_12704573.23-P1P2|AADACL4_+_12704601.23-P1P2	AADACL4	0.718238	0.143732	-0.283273	0.0947197	0.950079	0.0222401	-0.0599194	0.00354269	False	False		1110001A16Rik	0.942558	0.0256921	-0.747917	0.0635345	0.411538	0.38559	0.331354	0.31333	False	False		2810428I15Rik	0.893449	-0.1139	1.89587	0.945898	0.273402	2.17463	False	False
AADAT_-_171011368.23-P1P2|AADAT_+_171011325.23-P1P2	AADAT	0.66711	0.175802	-0.104252	0.0426375	0.653306	0.184884	0.0185177	0.00910151	False	False		1110001J03Rik	0.320746	0.493839	-0.365318	0.596504	0.193527	0.713259	-0.38149	0.667289	False	False		3110082I17Rik	2.7239	-0.131387	6.6674	0.137114	0.108727	0.12536	False	False
AAED1_-_99417574.23-P1P2|AAED1_+_99417525.23-P1P2	AAED1	0.112782	0.94776	-0.674011	1.4861	0.218402	0.660744	0.290404	0.51011	False	False		1110004E09Rik	0.0412892	1.38416	-0.82953	3.79644	0.809885	0.0915765	-0.0969412	0.0217709	False	False		3830406C13Rik	0.117767	0.00437114	0.00959029	0.100635	0.0613989	0.0519573	False	False
AAGAB_-_67546997.23-P1P2|AAGAB_-_67546928.23-P1P2	AAGAB	0.110226	0.957717	-1.07389	2.39266	0.700838	0.154383	-0.115693	0.0474824	False	False		1110004F10Rik	0.676004	0.170051	0.0880868	0.0495276	0.418204	0.378612	-0.148566	0.137942	False	False		4632434I11Rik	0.735665	0.0830802	1.13865	0.146569	-0.0629559	0.077592	False	False
AAK1_-_69870791.23-P1P2|AAK1_-_69870794.23-P1P2	AAK1	0.615019	0.211111	-0.100407	0.0493125	0.127746	0.893652	-1.1164	2.65227	False	False		1110007C09Rik	0.40446	0.393125	-0.186532	0.242461	0.166378	0.778905	-0.778814	1.48766	False	False		4921507P07Rik	0.412595	-0.044021	0.338374	0.127794	-0.00443619	0.00476715	False	False
AAMDC_-_77532236.23-P1P2|AAMDC_-_77532222.23-P1P2	AAMDC	0.076611	1.11571	0.566509	1.47042	0.90244	0.0445815	-0.0668637	0.00792453	False	False		1110008F13Rik	0.625045	0.204089	-0.0647349	0.0436833	0.211305	0.67509	-0.439495	0.727611	False	False		4922501C03Rik	0.288358	0.0311139	0.167148	0.0475518	-0.044027	0.0176045	False	False
AAMP_+_219134851.23-P1P2|AAMP_+_219134841.23-P1P2	AAMP	0.0341543	1.46655	-2.76496	9.43345	0.288825	0.539365	-2.65392	3.80539	False	False		1110008J03Rik	0.292464	0.533928	-0.356867	0.630009	0.753143	0.123123	-0.23824	0.0719344	False	False		4930506M07Rik	0.972334	0.0624579	1.1314	1.11172	-0.130931	1.22399	False	False
AANAT_-_74463789.23-P1P2|AANAT_+_74463735.23-P1P2	AANAT	0.139423	0.855666	0.276691	0.550785	0.279902	0.552994	-0.758859	1.1156	False	False		1110008L16Rik	0.812049	0.0904177	-0.057426	0.017168	0.301586	0.52059	-0.368938	0.471013	False	False		4930578C19Rik	0.646678	0.0522767	0.62981	0.234771	-0.059806	0.118067	False	False
AAR2_-_34824434.23-P1P2|AAR2_+_34824488.23-P1P2	AAR2	0.00303659	2.51761	-2.14411	12.558	0.405645	0.391854	-0.484686	0.504909	True	False		1110008P14Rik	0.184421	0.734189	-0.4307	1.04554	0.258227	0.587999	0.389084	0.561052	False	False		5031414D18Rik	0.618821	-0.0388025	0.447341	0.849469	0.100907	0.720789	False	False
AARS_+_70323362.23-P1P2|AARS_-_70323332.23-P1P2	AARS	0.0538431	1.26887	-7.35441	21.7094	0.838456	0.0765197	-0.977766	0.198901	True	False		1110012L19Rik	0.738668	0.131551	-0.302104	0.131403	0.0583827	1.23372	-0.654629	1.98059	False	False		5031439G07Rik	0.969742	-0.128336	2.31856	1.08926	0.326412	2.98976	False	False
AARS2_+_44281027.23-P1P2|AARS2_+_44281044.23-P1P2	AARS2	0.0179328	1.74635	-3.31863	13.4826	0.322349	0.491674	-2.71042	3.54276	True	False		1110017D15Rik	0.593389	0.226661	-0.188878	0.141552	0.111188	0.953941	0.197903	0.462975	False	False		5730455P16Rik	0.216367	-0.000483152	0.00194755	0.325178	-0.0778347	0.21283	False	False
AARSD1_-_41116425.23-P1|AARSD1_+_41116412.23-P1	AARSD1	0.630133	0.200568	0.0696254	0.0324872	0.982037	0.00787235	-0.0462926	0.000968822	False	False		1110025L11Rik	0.51016	0.292293	0.102493	0.0990538	0.858439	0.0662904	0.104231	0.0169446	False	False		6430548M08Rik	0.02941	-0.0053706	0.0029426	0.100635	-0.0440688	0.0372921	False	False
AASDH_-_57253588.23-P1P2|AASDH_+_57253570.23-P1P2	AASDH	0.299585	0.52348	-0.416955	0.507777	0.604279	0.218762	0.471156	0.274009	False	False		1110032A03Rik	0.425071	0.371539	0.126876	0.155862	0.0611473	1.21362	-0.621273	1.84906	False	False		6820408C15Rik	0.107659	0.00906458	0.0181807	1.05597	0.226472	2.01097	False	False
AASS_+_121784247.23-P1P2|AASS_+_121784219.23-P1P2	AASS	0.139358	0.855869	0.0977507	0.19463	0.440431	0.356122	-0.212463	0.201145	False	False		1110032F04Rik	0.800334	0.0967288	0.0186594	0.00596776	0.923444	0.0345895	-0.098329	0.00834085	False	False		9430015G10Rik	0.375279	0.020404	0.142654	1.65815	-0.328956	4.58669	False	False
AATF_-_35306286.23-P1P2|AATF_-_35306346.23-P1P2	AATF	0.00168427	2.77359	-4.82338	31.1227	0.161398	0.792103	-4.88877	10.2946	True	True		1110034G24Rik	0.375465	0.425431	0.218681	0.307608	0.0133972	1.87299	-1.02124	4.69078	False	False		A230050P20Rik	0.197532	0.0448529	0.16506	1.08089	-0.190275	1.72943	False	False
AATK_-_79139957.23-ENST00000326724.4|AATK_+_79139571.23-ENST00000326724.4	AATK	0.276325	0.55858	-0.688616	0.894842	0.778633	0.108667	0.113021	0.0326502	False	False		1110037F02Rik	0.000554588	3.25603	-1.46061	15.7246	0.00100239	2.99896	1.44396	10.6196	True	True		A2m	0.058435	-0.0190158	0.0207015	0.737857	0.0205967	0.127793	False	False
ABAT_-_8768533.23-P1|ABAT_-_8768504.23-P1	ABAT	0.50227	0.299063	-0.354066	0.246337	0.11787	0.928595	0.43341	1.06993	False	False		1110038F14Rik	0.752851	0.123291	-0.117364	0.0478439	0.034629	1.46056	0.561656	2.01175	False	False		A4galt	0.320874	-0.0399176	0.238623	0.466739	-0.0256557	0.100692	False	False
ABAT_+_8807464.23-P2|ABAT_+_8807450.23-P2	ABAT	0.600865	0.221223	-0.297523	0.153121	0.0978681	1.00936	0.445104	1.19436	False	False		1110051M20Rik	0.659749	0.180621	-0.125741	0.0750935	0.413614	0.383404	0.370341	0.348211	False	False		Aacs	0.0165739	-0.0119691	0.00369574	0.143854	-0.0992764	0.12009	False	False
ABCA1_-_107690385.23-P1P2|ABCA1_-_107690389.23-P1P2	ABCA1	0.00634688	2.19744	-4.08018	20.8583	0.956104	0.019495	-0.0141147	0.000731514	True	False		1110057K04Rik	0.459731	0.337496	-0.0404235	0.0451088	0.724572	0.139918	0.0183339	0.0062909	False	False		Aadacl2	0.0538604	-0.00489516	0.0049119	0.75667	0.187695	1.19426	False	False
ABCA10_+_67224811.23-P1P2|ABCA10_-_67224823.23-P1P2	ABCA10	0.0764847	1.11643	0.584516	1.51813	0.0490262	1.30957	-1.04141	3.62561	False	False		1110058L19Rik	0.330319	0.481066	0.108485	0.172557	0.0941928	1.02598	0.342848	0.862632	False	False		Aadat	0.0928075	-0.00478477	0.0082729	0.382812	0.0451504	0.14534	False	False
ABCA12_+_216003308.23-P1P2|ABCA12_+_216003314.23-P1P2	ABCA12	0.210006	0.677769	0.333544	0.525918	0.765584	0.116007	-0.0921379	0.0284152	False	False		1110059E24Rik	0.836729	0.0774151	-0.0817457	0.0209242	0.267324	0.572962	-0.239073	0.335923	False	False		Aak1	1.12575	0.0798864	1.67544	0.857849	-0.170207	1.2278	False	False
ABCA13_+_48211097.23-P1P2|ABCA13_-_48211093.23-P1P2	ABCA13	0.293577	0.532278	0.206414	0.2556	0.00952648	2.02107	-0.456571	2.45311	False	False		1110059G10Rik	0.544523	0.263984	-0.219295	0.191409	0.126673	0.897317	-0.29481	0.648742	False	False		Aanat	0.0630496	-0.00805388	0.00946022	0.290196	-0.0749077	0.182791	False	False
ABCA2_-_139922596.23-P1P2|ABCA2_+_139922669.23-P1P2	ABCA2	0.424103	0.372529	-0.0457389	0.0396396	0.930234	0.0314077	-0.0557502	0.00465491	False	False		1110059M19Rik	0.900796	0.0453737	-0.0129698	0.00194579	0.219393	0.658778	0.588388	0.950576	False	False		Aars	0.131938	-0.0736675	0.181075	0.977531	0.301031	2.47446	False	False
ABCA3_-_2390704.23-P1P2|ABCA3_+_2390336.23-P1P2	ABCA3	0.00922783	2.0349	-3.49563	16.5483	0.351088	0.454584	0.877247	1.06014	True	False		1110065P20Rik	0.589904	0.229219	-0.050355	0.0381637	0.398805	0.39924	-0.348367	0.341078	False	False		Aars2	2.85921	-0.450545	23.9993	2.57017	0.627989	13.5722	True	True
ABCA4_-_94586658.23-P1P2|ABCA4_+_94586668.23-P1P2	ABCA4	0.885216	0.0529505	-0.103901	0.0127989	0.0042056	2.37617	-0.780297	4.92908	False	False		1190002N15Rik	0.209142	0.679559	-0.294283	0.661226	0.727304	0.138284	0.225056	0.0763214	False	False		Aass	0.370053	-0.0404259	0.2787	0.00260366	-0.0103504	0.00022661	False	False
ABCA5_-_67323220.23-P1P2|ABCA5_+_67323191.23-P1P2	ABCA5	0.815743	0.0884467	0.114537	0.0235673	0.70667	0.150783	0.37323	0.149609	False	False		1190003K10Rik	0.967239	0.0144663	-0.215431	0.0103044	0.986684	0.0058218	-0.101558	0.00144995	False	False		Aatf	0.648842	-0.120692	1.45891	0.75667	0.120608	0.767396	False	False
ABCA6_+_67138008.23-P1P2|ABCA6_+_67137842.23-P1P2	ABCA6	0.128829	0.889986	-0.644732	1.33489	0.411488	0.385643	0.527792	0.541099	False	False		1190005I06Rik	0.551724	0.258278	0.221117	0.188828	0.592089	0.227613	-0.139353	0.0777856	False	False		Aatk	0.17637	-0.0361603	0.118815	0.719252	-0.110123	0.666038	False	False
ABCA7_-_1040133.23-P1|ABCA7_+_1040185.23-P1	ABCA7	0.91799	0.0371619	-0.229081	0.0198048	0.678036	0.168747	0.0719157	0.0322618	False	False		1190007I07Rik	0.597883	0.223384	-0.260929	0.192722	0.10021	0.999088	0.78182	1.91555	False	False		Abat	0.54841	0.0365944	0.373881	0.0638885	-0.0236011	0.0126792	False	False
ABCA7_+_1041311.23-P2|ABCA7_-_1041459.23-P2	ABCA7	0.638807	0.19463	0.179734	0.0813812	0.113419	0.945315	-0.501232	1.25963	False	False		1200014J11Rik	0.169411	0.771059	-0.410692	1.04704	0.463497	0.333953	0.189944	0.155559	False	False		Abca1	0.719733	-0.136099	1.82491	0.0328365	0.0951399	0.0262699	False	False
ABCA8_+_66951401.23-P1P2|ABCA8_-_66951525.23-P1P2	ABCA8	0.291895	0.534773	-0.547472	0.681106	0.804623	0.0944077	0.0490814	0.0123184	False	False		1300002K09Rik	0.310324	0.508185	0.010815	0.0181721	0.0521868	1.28244	-0.724558	2.27874	False	False		Abca13	1.46045	0.0700441	1.90578	0.662451	-0.202677	1.12901	False	False
ABCA9_-_67057053.23-P1P2|ABCA9_+_67057085.23-P1P2	ABCA9	0.211535	0.674618	0.154613	0.242654	0.350139	0.455759	-0.244726	0.296513	False	False		1300017J02Rik	0.137717	0.861011	-0.553871	1.57679	0.0163196	1.78729	0.671293	2.94233	False	False		Abca3	1.60897	0.0689551	2.06694	1.20962	-0.203531	2.07024	False	False
ABCB1_-_87342674.23-ENST00000265724.3|ABCB1_-_87342657.23-ENST00000265724.3	ABCB1	0.855358	0.0678523	-0.132751	0.0209548	0.965675	0.015169	-0.0083527	0.000336831	False	False		1500009L16Rik	0.868371	0.0612946	0.0265399	0.00537872	0.651728	0.185934	0.504712	0.230137	False	False		Abca4	0.0437133	0.0158331	0.0128942	1.0286	-0.173364	1.4995	False	False
ABCB10_+_229694285.23-P1P2|ABCB10_-_229694297.23-P1P2	ABCB10	0.0426301	1.37028	-8.20084	26.1428	0.0222982	1.65173	5.15059	22.6164	True	True		1500012F01Rik	0.0278682	1.55489	-0.445628	2.29103	0.973866	0.0115009	0.286925	0.00809252	False	False		Abca5	0.330851	0.0223284	0.137627	0.240925	-0.0570247	0.115527	False	False
ABCB11_-_169887784.23-P1P2|ABCB11_-_169887796.23-P1P2	ABCB11	0.098437	1.00684	0.15621	0.365892	0.9981	0.000825871	-0.0393902	8.64825e-05	False	False		1500015O10Rik	0.70682	0.150691	-0.00838603	0.00417832	0.111188	0.953941	-0.92908	2.17349	False	False		Abca6	0.74254	-0.0844522	1.16827	0.858882	0.0374075	0.270166	False	False
ABCB4_+_87104933.23-P1P2|ABCB4_-_87104975.23-P1P2	ABCB4	0.0789024	1.10291	0.245859	0.630827	0.190521	0.720058	-0.698967	1.33799	False	False		1600002H07Rik	0.24338	0.613715	-0.173728	0.352529	0.0308862	1.51023	0.44509	1.64845	False	False		Abca7	0.361401	-0.0618402	0.416365	0.549029	-0.125724	0.580433	False	False
ABCB5_+_20687051.23-P1P2|ABCB5_+_20687242.23-P1P2	ABCB5	0.205288	0.687637	0.172759	0.276365	0.130464	0.884509	-0.416726	0.979898	False	False		1600002K03Rik	0.448436	0.348299	-0.344737	0.397006	0.344313	0.463047	-0.586009	0.665446	False	False		Abca9	0.154465	0.0368789	0.106126	0.424932	-0.198509	0.709314	False	False
ABCB6_-_220083604.23-P1P2|ABCB6_+_220083613.23-P1P2	ABCB6	0.275709	0.55955	0.222928	0.290193	0.411038	0.386118	-0.406313	0.417071	False	False		1600012H06Rik	0.330677	0.480595	-0.374621	0.595291	0.75921	0.119638	0.102768	0.0301518	False	False		Abcb10	0.38581	-0.0334607	0.240504	1.20962	0.180249	1.83341	False	False
ABCB7_-_74376019.23-P1P2|ABCB7_+_74375885.23-P1P2	ABCB7	0.0281749	1.55014	-9.80879	35.3728	0.655366	0.183516	-1.27512	0.622091	True	False		1600014C10Rik	0.832229	0.079757	-0.116578	0.0307429	0.0494275	1.30603	0.568905	1.82212	False	False		Abcb11	0.0630496	-0.0992601	0.116593	0.232255	-0.0594898	0.116184	False	False
ABCB8_-_150725551.23-P1P2|ABCB8_-_150725580.23-P1P2	ABCB8	0.0979722	1.0089	-0.731512	1.71693	0.229569	0.639087	-0.57955	0.984644	False	False		1600014C23Rik	0.675477	0.170389	-1.12684	0.634839	0.131512	0.881036	-0.538542	1.16358	False	False		Abcb1a	1.10716	0.0776345	1.60133	0.0734541	-0.0935344	0.0577732	False	False
ABCB9_-_123465699.23-P2|ABCB9_-_123465738.23-P2	ABCB9	0.0231958	1.63459	0.20025	0.761492	0.815886	0.0883705	-0.139847	0.032854	False	False		1600014K23Rik	0.951162	0.0217454	0.06199	0.00445704	0.782614	0.106452	0.174643	0.045592	False	False		Abcb8	0.6167	0.106638	1.22518	0.388866	-0.116808	0.381955	False	False
ABCB9_+_123450970.23-P1|ABCB9_-_123450999.23-P1	ABCB9	0.696932	0.156809	-0.0639842	0.0233415	0.470817	0.327147	0.0340747	0.0296349	False	False		1600015I10Rik	0.739212	0.131231	-0.173285	0.0751888	0.292815	0.533407	0.201535	0.263629	False	False		Abcc1	0.504717	-0.0183687	0.172718	0.129117	-0.0994893	0.108019	False	False
ABCC1_+_16043647.23-P1P2|ABCC1_+_16043482.23-P1P2	ABCC1	0.740147	0.130682	-0.247318	0.0751892	0.278349	0.555411	0.294015	0.434123	False	False		1600016N20Rik	0.645204	0.190303	0.0919503	0.0578571	0.952977	0.0209175	-0.0900631	0.00461997	False	False		Abcc2	0.226701	-0.0360625	0.152308	0.185751	-0.0457636	0.0714806	False	False
ABCC10_+_43395315.23-P1P2|ABCC10_-_43395343.23-P1P2	ABCC10	0.139331	0.855953	-0.310805	0.618901	0.269215	0.569901	0.571978	0.866577	False	False		1600029D21Rik	0.848002	0.0716029	-0.127221	0.0301196	0.00937002	2.02826	-0.700225	3.48293	False	False		Abcc3	0.25236	0.0285535	0.134244	0.486237	-0.165925	0.678422	False	False
ABCC11_-_48278125.23-P1|ABCC11_+_48278130.23-P1	ABCC11	0.397441	0.400727	0.0122857	0.0114533	0.884254	0.0534229	0.0440382	0.0062544	False	False		1700001C02Rik	0.439004	0.357532	0.296377	0.350361	0.814661	0.0890232	-0.429983	0.0938725	False	False		Abcc4	0.642358	0.059883	0.71663	0.0229027	0.0110057	0.00211955	False	False
ABCC11_+_48281428.23-P2|ABCC11_+_48281345.23-P2	ABCC11	0.10303	0.987035	0.452388	1.03879	0.639568	0.194113	0.0992546	0.0512193	False	False		1700001C19Rik	0.36241	0.4408	0.14588	0.212615	0.638147	0.195079	-0.156657	0.0749452	False	False		Abcc8	0.0304955	-0.0348795	0.0198162	0.318414	-0.132598	0.355032	False	False
ABCC12_-_48180643.23-ENST00000311303.3|ABCC12_-_48180648.23-ENST00000311303.3	ABCC12	0.251411	0.599616	0.0581661	0.0811385	0.535811	0.270988	-0.28498	0.205302	False	False		1700001J03Rik	0.630793	0.200113	-0.228646	0.151285	0.514212	0.288857	-0.215922	0.152955	False	False		Abcc9	0.0326739	0.00391194	0.00238126	0.192979	-0.0979384	0.158928	False	False
ABCC2_+_101542981.23-P1P2|ABCC2_-_101542705.23-P1P2	ABCC2	0.353813	0.451226	0.187619	0.19695	0.671449	0.172987	0.0306538	0.014097	False	False		1700001K19Rik	0.814285	0.0892233	-0.0861712	0.0254213	0.983737	0.00712102	0.062324	0.00108838	False	False		Abcd2	0.380531	-0.0454889	0.322485	0.402755	0.10001	0.338705	False	False
ABCC3_+_48712270.23-P1P2|ABCC3_+_48712248.23-P1P2	ABCC3	0.923117	0.0347431	-0.167796	0.0135623	0.975084	0.0109578	-0.0428615	0.00124859	False	False		1700001L19Rik	0.55317	0.257142	-0.398354	0.338688	0.911889	0.0400583	0.404976	0.0397837	False	False		Abcd4	1.17317	-0.0934671	2.04284	0.153405	0.0557832	0.0719585	False	False
ABCC4_+_95953430.23-P1P2|ABCC4_+_95953641.23-P1P2	ABCC4	0.396901	0.401318	-0.108587	0.10138	0.224207	0.649351	0.231908	0.400335	False	False		1700001O22Rik	0.220325	0.656937	-0.612441	1.33029	0.712597	0.147156	0.106915	0.0385834	False	False		Abce1	0.817626	-0.0644646	0.981951	0.925077	0.11683	0.908804	False	False
ABCC5_-_183735467.23-P1P2|ABCC5_+_183735648.23-P1P2	ABCC5	0.0809943	1.09155	0.25873	0.65701	0.455693	0.341328	-0.10431	0.0946509	False	False		1700001P01Rik	0.145724	0.836469	0.283516	0.784124	0.961678	0.0169704	0.122762	0.00510905	False	False		Abcg1	0.166703	0.0256484	0.0796557	0.203217	0.0143337	0.0244938	False	False
ABCC6_-_16317247.23-ENST00000205557.7|ABCC6_-_16317344.23-ENST00000205557.7	ABCC6	0.273634	0.56283	0.0944504	0.12367	0.455802	0.341224	-0.386893	0.35096	False	False		1700003E16Rik	0.836166	0.0777073	-0.205424	0.05278	0.836202	0.0776886	0.0290654	0.00553755	False	False		Abcg2	0.146427	-0.0675486	0.184269	0.512591	-0.0831516	0.35841	False	False
ABCC8_+_17498387.23-P1P2|ABCC8_+_17498394.23-P1P2	ABCC8	0.828662	0.0816228	-0.157741	0.029953	0.16527	0.781807	0.0981302	0.203953	False	False		1700003F12Rik	0.877453	0.0567762	-0.0129931	0.00243914	0.647536	0.188736	0.135469	0.0627013	False	False		Abhd17a	0.228188	0.0291442	0.123896	0.0350721	-0.0728017	0.0214705	False	False
ABCC9_+_22094309.23-P1P2|ABCC9_+_22094148.23-P1P2	ABCC9	0.012987	1.88649	-3.47877	15.2674	0.695851	0.157484	-0.196852	0.0824144	True	False		1700003M02Rik	0.782569	0.106477	-0.238987	0.0841373	0.476021	0.322374	0.526322	0.416097	False	False		Abi1	2.36202	-0.13195	5.80638	0.150663	0.0653868	0.0828388	False	False
ABCD1_-_152990338.23-P1P2|ABCD1_-_152990342.23-P1P2	ABCD1	0.143528	0.843063	-1.29783	2.54544	0.0978518	1.00943	-0.516471	1.38596	False	False		1700006A11Rik	0.583456	0.233992	-0.134058	0.103717	0.89344	0.0489347	0.143111	0.0171741	False	False		Abl1	0.151775	-0.0233771	0.0661005	0.41749	-0.120824	0.424169	False	False
ABCD2_+_40013594.23-P1P2|ABCD2_-_40013610.23-P1P2	ABCD2	0.725908	0.139118	-0.0185006	0.0059876	0.594401	0.22592	-0.531785	0.319388	False	False		1700006E09Rik	0.0405071	1.39247	-0.42789	1.97004	0.286185	0.543353	0.313472	0.4177	False	False		Abl2	0.191829	0.00822512	0.0293948	0.210616	-0.0925567	0.163922	False	False
ABCD3_+_94884002.23-P1P2|ABCD3_+_94884032.23-P1P2	ABCD3	0.328017	0.484103	0.351969	0.396393	0.350623	0.45516	-0.348127	0.42124	False	False		1700007B14Rik	0.894524	0.0484081	-0.135367	0.0216665	0.484624	0.314595	0.169749	0.130961	False	False		Ablim2	0.052723	0.0206784	0.020311	0.841443	-0.241159	1.70634	False	False
ABCD4_+_74769611.23-P1P2|ABCD4_-_74769729.23-P1P2	ABCD4	0.277193	0.557218	-0.469003	0.607973	0.600736	0.221316	0.194877	0.114658	False	False		1700007G11Rik	0.805349	0.0940157	-0.177091	0.0550497	0.341719	0.466331	0.291647	0.333531	False	False		Abo	0.138484	-0.00790531	0.0203955	0.00469778	-0.0501245	0.00198007	False	False
ABCE1_-_146019502.23-P1P2|ABCE1_-_146019516.23-P1P2	ABCE1	0.00174126	2.75914	-10.205	65.5046	0.106469	0.972776	0.895198	2.31505	True	False		1700007K09Rik	0.615508	0.210767	0.110669	0.0771229	0.446797	0.34989	-0.15718	0.134869	False	False		Abtb1	0.297994	0.0195014	0.108265	2.34465	0.312824	6.16761	False	False
ABCF1_-_30546354.23-P2|ABCF1_-_30546344.23-P2	ABCF1	0.132591	0.877486	0.0749694	0.153041	0.667448	0.175582	0.0584481	0.0272822	False	False		1700007K13Rik	0.48324	0.315837	0.182163	0.19023	0.775355	0.1105	0.104355	0.0282786	False	False		Acaca	0.530359	-0.0331701	0.327741	0.130443	-0.0423812	0.0464871	False	False
ABCF1_+_30539238.23-P1|ABCF1_+_30539469.23-P1	ABCF1	0.00792832	2.10082	-5.71124	27.9128	0.148802	0.827392	-3.57405	7.86141	True	False		1700008A04Rik	0.0221093	1.65543	0.490549	2.68503	0.26597	0.575168	0.228253	0.321954	False	False		Acacb	0.599037	0.0377093	0.420839	0.0788413	-0.0227434	0.0150781	False	False
ABCF2_+_150924287.23-P1P2|ABCF2_+_150924236.23-P1P2	ABCF2	0.693197	0.159143	-0.06742	0.0249609	0.414557	0.382415	-0.338729	0.344363	False	False		1700008F21Rik	0.753945	0.12266	-0.0825911	0.0334961	0.363588	0.439391	0.458257	0.493792	False	False		Acad8	0.315924	-0.0501839	0.295366	1.14297	0.185988	1.78754	False	False
ABCF3_-_183903991.23-P1P2|ABCF3_-_183904021.23-P1P2	ABCF3	0.130548	0.884231	-0.456455	0.938962	0.566378	0.246894	0.163634	0.107402	False	False		1700008I05Rik	0.04223	1.37438	0.368911	1.67643	0.619029	0.208289	-0.502075	0.25646	False	False		Acadm	1.27144	0.0813848	1.92775	0.33199	-0.00831755	0.0232198	False	False
ABCG1_-_43639282.23-P1P2|ABCG1_+_43639503.23-P1P2	ABCG1	0.0583951	1.23362	-1.23237	3.53677	0.158027	0.80127	-0.606351	1.29161	False	False		1700008O03Rik	0.168964	0.772206	-0.282368	0.720953	0.462166	0.335202	0.040473	0.0332702	False	False		Acads	0.710698	0.032949	0.436255	0.55487	-0.0836193	0.390154	False	False
ABCG2_+_89080044.23-P1P2|ABCG2_+_89079974.23-P1P2	ABCG2	0.211064	0.675585	-0.511446	0.803829	0.144624	0.839761	0.674921	1.50673	False	False		1700008P02Rik	0.63387	0.198	0.0331806	0.0217224	0.491475	0.308499	-0.250456	0.189482	False	False		Acadsb	0.0102866	0.00238074	0.000456246	0.261246	0.047854	0.105125	False	False
ABCG4_+_119019794.23-P1P2|ABCG4_-_119019798.23-P1P2	ABCG4	0.405911	0.391569	0.227168	0.206937	0.651148	0.18632	-0.212794	0.105402	False	False		1700009N14Rik	0.571641	0.242877	-0.120761	0.0969776	0.342829	0.464923	0.427718	0.487665	False	False		Acan	0.916035	-0.0672189	1.14714	0.451363	0.0935569	0.355092	False	False
ABCG5_+_44065865.23-P1P2|ABCG5_-_44065840.23-P1P2	ABCG5	0.139406	0.855718	0.212583	0.423198	0.422223	0.374458	-0.315576	0.314149	False	False		1700009P17Rik	0.836729	0.0774151	-0.0551219	0.0141094	0.589073	0.229831	0.207911	0.117184	False	False		Acat1	0.335878	0.0139021	0.0869909	0.538395	0.0891581	0.403645	False	False
ABCG8_+_44066166.23-P1P2|ABCG8_-_44066172.23-P1P2	ABCG8	0.172852	0.762325	0.042434	0.0752554	0.585277	0.232638	0.0499587	0.0308973	False	False		1700010B08Rik	0.583951	0.233623	-0.0507248	0.0391827	0.182539	0.738644	0.454233	0.822806	False	False		Accs	0.151775	-0.0175227	0.0495468	0.799765	-0.171624	1.15419	False	False
ABHD1_-_27346733.23-P1P2|ABHD1_+_27346724.23-P1P2	ABHD1	0.022205	1.65355	0.174419	0.670956	0.368314	0.433782	0.322433	0.371825	False	False		1700010D01Rik	0.634383	0.197648	-0.232444	0.151904	0.538446	0.268858	0.0198203	0.0130682	False	False		Ace	0.581106	0.0239155	0.25891	1.68568	0.170176	2.41218	False	False
ABHD10_-_111697914.23-P1P2|ABHD10_-_111697877.23-P1P2	ABHD10	0.864808	0.0630802	-0.125866	0.0184708	0.805576	0.0938937	-0.202759	0.050611	False	False		1700010I14Rik	0.196872	0.705817	0.307564	0.71777	0.270691	0.567526	-0.62317	0.867313	False	False		Ace2	1.64888	0.0889787	2.73331	0.457106	-0.187587	0.72104	False	False
ABHD11_-_73153094.23-P1P2|ABHD11_+_73152963.23-P1P2	ABHD11	0.615833	0.210537	-0.484729	0.237417	0.550953	0.258886	-0.487744	0.335682	False	False		1700011A15Rik	0.453195	0.343715	-0.189701	0.215588	0.0953436	1.02071	-0.695377	1.74063	False	False		Ache	0.885978	0.0482756	0.796828	0.215089	-0.0233881	0.042301	False	False
ABHD12_+_25371393.23-P1P2|ABHD12_+_25371436.23-P1P2	ABHD12	0.545229	0.263421	-0.352436	0.215981	0.639532	0.194138	0.0791444	0.0408468	False	False		1700011E24Rik	0.842362	0.0745013	0.0964794	0.023766	0.714226	0.146164	-0.210266	0.0753692	False	False		Ackr3	0.0208137	0.0208149	0.00807117	0.478401	0.0589913	0.237311	False	False
ABHD12B_-_51338864.23-P1P2|ABHD12B_-_51338885.23-P1P2	ABHD12B	0.00481751	2.31718	0.220641	1.1894	0.00681123	2.16677	0.368871	2.12479	False	False		1700011H14Rik	0.583951	0.233623	-0.436576	0.337236	0.694229	0.158497	-0.0836954	0.0325317	False	False		Aco2	1.09783	0.0826328	1.69006	0.313372	-0.107843	0.284178	False	False
ABHD13_+_108871155.23-P1P2|ABHD13_+_108870795.23-P1P2	ABHD13	0.612146	0.213145	-0.0858581	0.0425735	0.0409884	1.38734	-0.390052	1.43858	False	False		1700011I03Rik	0.129507	0.887707	-0.521856	1.53172	0.132754	0.876953	0.958209	2.06073	False	False		Acot13	0.625204	0.0633615	0.738008	0.3337	-0.0809603	0.227178	False	False
ABHD14A_+_52009255.23-P1P2|ABHD14A_+_52009194.23-P1P2	ABHD14A	0.636255	0.196369	-0.115732	0.0528701	0.641577	0.192751	-0.223615	0.114585	False	False		1700011L22Rik	0.931095	0.0310058	0.0126995	0.00130193	0.751485	0.12408	-0.109425	0.0332967	False	False		Acox1	0.719733	0.0448931	0.601956	0.113418	-0.0520983	0.0496873	False	False
ABHD14B_+_52017350.23-P2|ABHD14B_-_52016965.23-P2	ABHD14B	0.380545	0.419594	-0.494597	0.482797	0.82149	0.0853979	-0.059807	0.0135777	False	False		1700012A03Rik	0.0227029	1.64392	-0.687647	3.73769	0.0800969	1.09638	0.618724	1.66358	False	False		Acp1	0.380531	0.0345443	0.244896	1.28413	-0.228293	2.46513	False	False
ABHD15_-_27894008.23-P1P2|ABHD15_-_27893980.23-P1P2	ABHD15	0.00948364	2.02303	-1.99127	9.37165	0.161679	0.791346	0.479638	1.00904	False	False		1700012B07Rik	0.326752	0.485781	-0.113473	0.182259	0.243508	0.613487	0.621299	0.934739	False	False		Acp2	0.122883	-0.0217287	0.049744	0.468675	0.0845599	0.333253	False	False
ABHD16A_-_31670764.23-P1P2|ABHD16A_+_31670831.23-P1P2	ABHD16A	0.216542	0.664457	0.13713	0.211974	0.982494	0.00766989	-0.0343614	0.00070063	False	False		1700012B09Rik	0.297447	0.52659	0.117635	0.204818	0.217758	0.662027	-0.580574	0.942578	False	False		Acp5	1.74389	-0.125555	4.07913	0.716941	0.121126	0.730228	False	False
ABHD16B_-_62492870.23-P1P2|ABHD16B_+_62492837.23-P1P2	ABHD16B	0.92926	0.031863	-0.142121	0.0105348	0.225902	0.64608	0.520367	0.893767	False	False		1700012P22Rik	0.993101	0.00300656	-0.0159533	0.000158591	0.298192	0.525505	0.307342	0.396079	False	False		Acp6	0.183357	0.0351962	0.120228	0.0758719	-0.0751544	0.0479484	False	False
ABHD17A_-_1885483.23-P1P2|ABHD17A_+_1885470.23-P1P2	ABHD17A	0.148848	0.827256	0.0728055	0.140116	0.654182	0.184301	0.0871085	0.0426793	False	False		1700013D24Rik	0.762169	0.117949	-0.216856	0.0845709	0.940227	0.0267673	-0.116199	0.00762763	False	False		Acpp	0.0771353	-0.0146104	0.0209956	0.00364947	0.0529472	0.00162484	False	False
ABHD17B_+_74526089.23-P1P2|ABHD17B_+_74525862.23-P1P2	ABHD17B	0.0348469	1.45784	0.365391	1.23923	0.527903	0.277446	-0.286413	0.211252	False	False		1700013F07Rik	0.331394	0.479655	-0.249463	0.395633	0.0218775	1.66	0.834493	3.39715	False	False		Acpt	0.502765	-0.113001	1.05843	0.00643833	-0.00412635	0.000223397	False	False
ABHD17C_+_80987703.23-P1P2|ABHD17C_+_80987662.23-P1P2	ABHD17C	0.0315723	1.50069	-0.777367	2.71395	0.0298809	1.52461	0.688706	2.79139	False	False		1700013G24Rik	0.110878	0.955157	0.340902	1.07662	0.120048	0.920645	-0.496502	1.12098	False	False		Acsbg1	0.346009	0.0390979	0.252032	0.282059	-0.0592662	0.140567	False	False
ABHD2_-_89631760.23-P1P2|ABHD2_-_89631738.23-P1P2	ABHD2	0.974587	0.0111793	-0.181366	0.00471687	0.0456214	1.34083	-0.524213	1.86857	False	False		1700013H16Rik	0.849131	0.0710251	-0.0215394	0.00505828	0.851014	0.0700635	0.155439	0.0267077	False	False		Acsl1	0.419849	-0.0571045	0.44666	0.275602	0.0941318	0.218151	False	False
ABHD3_-_19284770.23-P1P2|ABHD3_+_19284534.23-P1P2	ABHD3	0.063602	1.19653	-8.43187	23.471	0.93393	0.0296858	0.304515	0.0240318	True	False		1700015E13Rik	0.689755	0.161305	0.0829029	0.0442156	0.433004	0.363508	0.157853	0.140719	False	False		Acsl3	0.159878	-0.0229087	0.068234	0.0981102	-0.00365702	0.00301703	False	False
ABHD4_-_23067199.23-P1P2|ABHD4_+_23067144.23-P1P2	ABHD4	0.0402843	1.39486	-1.01857	3.30525	0.134525	0.871198	-0.886338	2.05279	False	False		1700015F17Rik	0.0487559	1.31197	-0.900797	3.90759	0.900352	0.0455877	-0.120911	0.0135175	False	False		Acsl4	1.01161	-0.12233	2.30548	0.130088	-0.0290085	0.0317323	False	False
ABHD5_-_43732464.23-P1P2|ABHD5_-_43732422.23-P1P2	ABHD5	0.107743	0.967611	-0.997301	2.24497	0.800324	0.0967341	-0.152141	0.039125	False	False		1700015G11Rik	0.0968822	1.01376	0.27509	0.922076	0.465275	0.332291	0.15712	0.128037	False	False		Acsl5	0.270957	-0.0351737	0.177554	0.0142451	-0.0363548	0.00435477	False	False
ABHD6_+_58223718.23-P1P2|ABHD6_-_58223594.23-P1P2	ABHD6	0.00377956	2.42256	0.217384	1.22514	0.103388	0.98553	-0.384349	1.00699	False	False		1700016C15Rik	0.410579	0.386603	-0.405598	0.518464	0.683507	0.165257	-0.141014	0.0571486	False	False		Acsl6	0.406326	-0.0746418	0.565029	0.563184	0.0992758	0.470145	False	False
ABHD8_-_17414201.23-P1P2|ABHD8_-_17414169.23-P1P2	ABHD8	0.789509	0.102643	-0.245366	0.0585904	0.451504	0.345338	0.232916	0.213832	False	False		1700016D06Rik	0.0795828	1.09918	0.334683	1.21636	0.117704	0.929208	-0.528636	1.20463	False	False		Acss1	0.283579	0.02245	0.118605	1.35148	-0.31312	3.55841	False	False
ABI1_-_27149837.23-P1P2|ABI1_-_27149855.23-P1P2	ABI1	0.113612	0.944574	0.141969	0.311971	0.174249	0.758831	-1.02955	2.07691	False	False		1700016H13Rik	0.562855	0.249604	-0.179783	0.148374	0.653302	0.184886	-0.196207	0.0889614	False	False		Acss2	0.0272463	-0.00797256	0.00404687	0.137114	-0.0433365	0.049966	False	False
ABI2_-_204193288.23-P1P2|ABI2_+_204193079.23-P1P2	ABI2	0.238951	0.621691	-0.0156428	0.0226242	0.964174	0.0158444	-0.0276609	0.00116512	False	False		1700016K19Rik	0.158715	0.799382	-0.320286	0.846545	0.0825122	1.08348	0.582454	1.54763	False	False		Acta1	1.52737	-0.118197	3.36331	0.948516	0.199389	1.59032	False	False
ABI3_-_47288028.23-P1P2|ABI3_+_47287798.23-P1P2	ABI3	0.0834802	1.07842	0.697722	1.75046	0.0692051	1.15986	-0.936858	2.88874	False	False		1700017B05Rik	0.336079	0.473559	0.226217	0.354207	0.736067	0.133083	0.244479	0.0797899	False	False		Acta2	0.500817	0.0553551	0.516476	0.824166	-0.222109	1.53928	False	False
ABI3BP_-_100712220.23-P1P2|ABI3BP_-_100712267.23-P1P2	ABI3BP	0.785363	0.104929	-0.0609193	0.0148709	0.326511	0.486102	0.161656	0.208904	False	False		1700017D01Rik	0.673372	0.171745	-0.160668	0.0912369	0.10653	0.972527	0.723045	1.72445	False	False		Actb	0.81045	0.109671	1.65589	1.06701	-0.2172	1.94881	False	False
ABL1_-_133589228.23-ENST00000372348.2|ABL1_-_133589216.23-ENST00000372348.2	ABL1	0.0685023	1.16429	0.231591	0.62729	0.678951	0.168161	-0.0780086	0.0348736	False	False		1700017N19Rik	0.570172	0.243994	0.041086	0.0331459	0.806195	0.0935599	-0.0796812	0.0182822	False	False		Actg1	0.165332	-0.0970193	0.298834	0.0568245	-0.00151851	0.00072559	False	False
ABL2_+_179111875.23-P1|ABL2_-_179112151.23-P1	ABL2	0.600415	0.221549	-0.0303829	0.0156596	0.798848	0.0975358	0.153846	0.0398913	False	False		1700018B08Rik	0.224146	0.649469	-0.376134	0.807716	0.119768	0.921658	0.332878	0.752382	False	False		Actl6b	0.315924	-0.0106479	0.0626702	0.500072	-0.134019	0.563557	False	False
ABL2_+_179198340.23-P2|ABL2_+_179198740.23-P2	ABL2	0.135165	0.869136	0.176006	0.355876	0.78757	0.103711	0.0153911	0.00424349	False	False		1700018C11Rik	0.699335	0.155315	-0.00513051	0.00263469	0.108119	0.9661	0.796414	1.88688	False	False		Actr2	0.946551	-0.066383	1.17062	0.0395741	-0.0446624	0.0148625	False	False
ABLIM1_+_116418018.23-ENST00000277895.5|ABLIM1_-_116417810.23-ENST00000277895.5	ABLIM1	0.985066	0.00653459	-0.171008	0.00259967	0.398573	0.399492	-0.410996	0.43649	False	False		1700018F24Rik	0.0905344	1.04319	-0.437561	1.50924	0.322132	0.491967	0.54555	0.658194	False	False		Actr3	0.675055	-0.146879	1.84719	0.322316	-0.101593	0.275348	False	False
ABLIM2_+_8160523.23-P1P2|ABLIM2_+_8160328.23-P1P2	ABLIM2	0.838053	0.0767283	-0.138729	0.0247632	0.452504	0.344378	-0.468769	0.429163	False	False		1700019A02Rik	0.684983	0.16432	-0.172059	0.0934818	0.825982	0.0830294	-0.753722	0.153471	False	False		Actr3b	0.106407	0.0153174	0.0303647	0.0544907	0.012341	0.00565472	False	False
ABLIM3_-_148521229.23-P1P2|ABLIM3_+_148521102.23-P1P2	ABLIM3	0.344365	0.462982	0.113184	0.121908	0.18745	0.727115	-0.386136	0.7464	False	False		1700019B03Rik	0.663406	0.178221	-0.330398	0.194694	0.467948	0.329802	-0.096838	0.0783218	False	False		Actr8	2.92142	-0.458785	24.9699	1.29437	0.123963	1.34925	True	False
ABO_-_136130921.23-P2|ABO_-_136130959.23-P2	ABO	0.347604	0.458916	-0.238048	0.254145	0.426043	0.370546	0.47672	0.469607	False	False		1700019D03Rik	0.304179	0.51687	-0.355604	0.607723	0.158927	0.798803	0.537822	1.05357	False	False		Acvr1	0.534349	-0.0626938	0.624113	0.17717	0.0100631	0.014992	False	False
ABO_+_136150601.23-P1|ABO_+_136150587.23-P1	ABO	0.048552	1.31379	0.0889097	0.271744	0.69206	0.159856	-0.00493454	0.00209703	False	False		1700019G17Rik	0.779803	0.108015	-0.115941	0.0414077	0.269111	0.570068	0.324161	0.45318	False	False		Acvr1b	0.690551	0.0599258	0.770945	0.290196	0.0424416	0.103567	False	False
ABR_+_1083212.23-P1P2|ABR_+_1082862.23-P1P2	ABR	0.0763443	1.11722	-1.28896	3.35014	0.551561	0.258406	-0.375518	0.257966	False	False		1700019L03Rik	0.863837	0.0635683	-0.170552	0.0358472	0.169521	0.770777	0.313021	0.591679	False	False		Acvr1c	0.473852	0.0401517	0.354454	0.108272	0.00549136	0.00499961	False	False
ABRA_+_107782422.23-P1P2|ABRA_+_107782407.23-P1P2	ABRA	0.732921	0.134943	-0.0703405	0.022082	0.725873	0.13914	0.0770914	0.0285158	False	False		1700019N19Rik	0.480995	0.31786	-0.135732	0.142651	0.406992	0.390414	0.246654	0.236155	False	False		Acvr2a	0.398227	0.0188507	0.139853	0.352712	-0.0777814	0.230693	False	False
ABRACL_+_139349876.23-P1P2|ABRACL_+_139349879.23-P1P2	ABRACL	0.495911	0.304596	-0.0299374	0.021214	0.0664906	1.17724	-0.38776	1.21355	False	False		1700019O17Rik	0.938544	0.0275452	0.241739	0.0220166	0.294153	0.531427	-0.549069	0.715574	False	False		Acvr2b	0.0299923	-0.00846027	0.00472725	0.272543	-0.0727571	0.166744	False	False
ABT1_-_26597263.23-P1P2|ABT1_+_26597412.23-P1P2	ABT1	0.00251169	2.60003	-4.72489	28.5795	0.0554805	1.25586	0.404949	1.35198	True	False		1700020A23Rik	0.438152	0.358375	-0.180662	0.214074	0.851584	0.0697723	-0.0559432	0.00957226	False	False		Acvrl1	0.0250923	-0.027863	0.0130252	0.143854	0.0414562	0.0501475	False	False
ABTB1_+_127391828.23-P1P2|ABTB1_+_127391831.23-P1P2	ABTB1	0.522733	0.28172	-0.297754	0.195146	0.177718	0.750269	0.221458	0.441709	False	False		1700020L24Rik	0.167628	0.775652	-0.444383	1.13968	0.861871	0.0645578	-0.0285053	0.00451293	False	False		Acy1	0.217835	-0.0369767	0.150062	0.490175	0.201237	0.829461	False	False
ABTB2_-_34379521.23-P1P2|ABTB2_-_34379465.23-P1P2	ABTB2	0.0218585	1.66038	-0.711939	2.75001	0.410405	0.386788	-0.157814	0.162273	False	False		1700020N15Rik	0.561883	0.250354	-0.0158595	0.0131281	0.925179	0.0337745	-0.186045	0.0154095	False	False		Acy3	0.00203821	-0.0275611	0.00104655	0.00574858	0.0417492	0.00201812	False	False
ACAA1_-_38178575.23-P1P2|ACAA1_+_38178488.23-P1P2	ACAA1	0.827431	0.0822682	-0.203676	0.0389812	0.823198	0.0844956	0.0383582	0.0086163	False	False		1700021F05Rik	0.132077	0.879173	-0.874146	2.54107	0.580128	0.236476	0.672131	0.389786	False	False		Acyp1	0.0977167	0.0157683	0.0287057	0.480355	0.0701293	0.28327	False	False
ACAA2_-_47339855.23-P1P2|ACAA2_-_47339858.23-P1P2	ACAA2	0.630775	0.200126	-0.0450479	0.020973	0.787183	0.103924	0.0990143	0.0273554	False	False		1700021F07Rik	0.0819606	1.08639	0.342584	1.23059	0.336935	0.472454	0.117015	0.135577	False	False		Acyp2	1.057	-0.0692409	1.36349	2.12965	0.259971	4.65555	False	False
ACACA_-_35716041.23-P1P2|ACACA_-_35716002.23-P1P2	ACACA	0.15235	0.817159	-0.564548	1.07323	0.855353	0.0678547	0.0590629	0.0106543	False	False		1700021K19Rik	0.445423	0.351228	0.247571	0.287506	0.0755583	1.12172	0.585027	1.60932	False	False		Ada	0.81045	-0.0718064	1.08418	1.25108	0.234193	2.46376	False	False
ACACB_-_109592519.23-P2|ACACB_-_109592496.23-P2	ACACB	0.496597	0.303996	0.100644	0.0711767	0.474804	0.323486	0.163309	0.140441	False	False		1700022I11Rik	0.0246597	1.60801	0.327357	1.74048	0.25487	0.593681	0.626675	0.912388	False	False		Adam12	0.389343	-0.038821	0.281587	0.0795184	-0.0394401	0.026372	False	False
ACACB_+_109569170.23-P1|ACACB_+_109569160.23-P1	ACACB	0.00462902	2.33451	0.424829	2.30724	0.0626126	1.20334	-0.768065	2.45705	False	False		1700022P22Rik	0.676531	0.169712	0.327093	0.183545	0.358993	0.444915	-0.232979	0.254201	False	False		Adam15	0.108913	0.0410089	0.0832096	0.146569	-0.0064102	0.00790045	False	False
ACAD10_-_112123907.23-P1P2|ACAD10_-_112123894.23-P1P2	ACAD10	0.49482	0.305552	-0.685464	0.487252	0.947444	0.0234463	-0.0805915	0.00502334	False	False		1700023E05Rik	0.530263	0.275508	-0.133865	0.121944	0.308105	0.511302	-0.445321	0.558385	False	False		Adam17	0.380531	0.028406	0.201379	0.998887	-0.226485	1.90237	False	False
ACAD11_+_132379379.23-P1P2|ACAD11_-_132379444.23-P1P2	ACAD11	0.0257848	1.58864	-2.76771	10.2289	0.111494	0.952749	1.17413	2.97389	True	False		1700023F06Rik	0.0912228	1.0399	-0.799706	2.74966	0.0990126	1.00431	0.984339	2.42435	False	False		Adam19	0.75175	0.0355496	0.497876	0.424932	-0.0413779	0.147852	False	False
ACAD8_-_134123507.23-P1P2|ACAD8_-_134123448.23-P1P2	ACAD8	0.393102	0.405495	0.0372368	0.035127	0.217477	0.662587	0.140659	0.247763	False	False		1700024G13Rik	0.754855	0.122137	0.108957	0.0440008	0.570688	0.243601	0.164698	0.0983901	False	False		Adam22	0.325849	-0.0457637	0.277813	0.0893593	0.00905607	0.00680484	False	False
ACAD9_-_128598508.23-P1P2|ACAD9_-_128598499.23-P1P2	ACAD9	0.0839985	1.07573	-0.844643	2.11378	0.520194	0.283835	-0.341773	0.257888	False	False		1700024P04Rik	0.626701	0.202939	-0.139107	0.093341	0.84531	0.0729838	-0.0664887	0.0119003	False	False		Adam28	1.57956	0.118303	3.48133	0.377437	0.110493	0.350684	False	False
ACADL_-_211090095.23-P1P2|ACADL_-_211090048.23-P1P2	ACADL	0.152441	0.816898	0.161395	0.30672	0.394321	0.40415	0.158596	0.170397	False	False		1700024P16Rik	0.964941	0.0154992	0.0300052	0.00153767	0.133506	0.874499	0.379184	0.813192	False	False		Adam33	0.458706	-0.0611192	0.522306	0.210616	-0.0715219	0.126668	False	False
ACADM_-_76190475.23-P1P2|ACADM_+_76190432.23-P1P2	ACADM	0.196981	0.705576	0.174981	0.287222	0.138703	0.857914	0.215168	0.490738	False	False		1700025F22Rik	0.241928	0.616315	0.0642257	0.130879	0.811836	0.0905315	-0.0739977	0.0164286	False	False		Adamts12	0.839325	0.0570643	0.892295	1.56129	-0.247623	3.25098	False	False
ACADS_-_121163671.23-P1P2|ACADS_+_121163685.23-P1P2	ACADS	0.658195	0.181645	-0.114332	0.0483145	0.331743	0.479199	-0.151576	0.193097	False	False		1700025G04Rik	0.00490741	2.30915	-0.714656	5.4564	0.0832871	1.07942	1.02309	2.70825	False	False		Adamts20	0.174981	0.0276253	0.0900559	0.464806	-0.156521	0.611763	False	False
ACADSB_-_124768552.23-P1P2|ACADSB_+_124768710.23-P1P2	ACADSB	0.926037	0.0333718	-0.136869	0.0106259	0.701674	0.153865	0.125349	0.0512731	False	False		1700026D08Rik	0.0515417	1.28784	-0.531027	2.26119	0.950078	0.0222406	-0.125113	0.00682389	False	False		Adamts5	0.407185	0.0132274	0.100342	0.085649	0.0101233	0.00729095	False	False
ACADVL_-_7123283.23-P1P2|ACADVL_-_7123242.23-P1P2	ACADVL	0.212384	0.672879	0.197779	0.309601	0.209467	0.678885	-0.28419	0.5129	False	False		1700026L06Rik	0.991376	0.00376144	-0.0201438	0.000250527	0.574102	0.241011	-0.318084	0.188002	False	False		Adamtsl1	1.08687	-0.126385	2.55911	1.49119	0.241498	3.0282	False	False
ACAN_-_89346701.23-P1P2|ACAN_+_89346671.23-P1P2	ACAN	0.586609	0.231651	-0.235341	0.126828	0.563155	0.249372	0.0906372	0.0600873	False	False		1700028K03Rik	0.151188	0.820482	-0.563854	1.52965	0.818053	0.0872184	0.741677	0.158638	False	False		Adamtsl3	0.510589	-0.0475308	0.452127	0.00364947	0.0420676	0.00129097	False	False
ACAP1_+_7239854.23-P1P2|ACAP1_+_7239956.23-P1P2	ACAP1	0.00512048	2.29069	-1.60146	8.53427	0.826194	0.0829179	0.126877	0.027968	False	False		1700028P14Rik	0.552687	0.25752	-0.331444	0.282214	0.241162	0.617692	0.324402	0.491405	False	False		Adamtsl5	0.370053	0.025928	0.17875	0.0943438	-0.0264673	0.0209972	False	False
ACAP2_+_195163707.23-P1P2|ACAP2_+_195163701.23-P1P2	ACAP2	0.09689	1.01372	0.140778	0.332	0.101082	0.995324	-0.213461	0.564822	False	False		1700029F12Rik	0.291804	0.534909	-0.534972	0.94617	0.884236	0.0534316	-0.316601	0.0414853	False	False		Adar	1.70342	-0.161252	5.11728	0.759036	0.214207	1.36721	False	False
ACAP3_+_1243258.23-P1P2|ACAP3_+_1243337.23-P1P2	ACAP3	0.0282645	1.54876	0.39801	1.43404	0.00962054	2.0168	-0.582114	3.12104	False	False		1700029H14Rik	0.686572	0.163314	-0.17601	0.0950426	0.243802	0.612963	0.76739	1.15354	False	False		Adc	0.00924721	0.0120079	0.00206867	0.0698473	-0.0228981	0.0134489	False	False
ACAT1_+_107992310.23-P1P2|ACAT1_+_107992321.23-P1P2	ACAT1	0.708231	0.149825	-0.0955319	0.0332978	0.419234	0.377544	-0.134466	0.134961	False	False		1700029I15Rik	0.807023	0.0931141	-0.13775	0.0424097	0.828251	0.0818381	0.0844385	0.0169465	False	False		Adck1	1.67238	-0.0785139	2.44622	0.393644	-0.0573867	0.189956	False	False
ACAT2_-_160183054.23-P1P2|ACAT2_-_160183042.23-P1P2	ACAT2	0.801395	0.0961531	-0.203577	0.0455381	0.990333	0.00421886	-0.0420221	0.000471304	False	False		1700029J07Rik	0.0561162	1.25091	0.352402	1.45755	0.265922	0.575245	-0.390693	0.551154	False	False		Adck2	0.536349	-0.0836224	0.835572	0.411942	0.180093	0.623835	False	False
ACBD3_-_226374411.23-P1P2|ACBD3_+_226374366.23-P1P2	ACBD3	0.141858	0.848147	0.098085	0.193534	0.442297	0.354286	0.11126	0.10479	False	False		1700029P11Rik	0.549318	0.260176	-0.194763	0.167545	0.61544	0.210814	-0.0502598	0.0259839	False	False		Adck3	0.138484	0.0232492	0.0599824	0.413788	-0.109486	0.380958	False	False
ACBD4_-_43213072.23-P1|ACBD4_-_43213050.23-P1	ACBD4	0.192082	0.716513	0.102032	0.170077	0.502185	0.299137	-0.186346	0.14819	False	False		1700030J22Rik	0.514734	0.288417	-0.200326	0.191037	0.684261	0.164778	0.159595	0.0644916	False	False		Adck4	1.75423	-0.107285	3.50622	1.67188	0.239985	3.37387	False	False
ACBD4_+_43210042.23-P2|ACBD4_+_43210060.23-P2	ACBD4	0.709313	0.149162	-0.244875	0.0849743	0.300375	0.522337	0.277196	0.384916	False	False		1700030K09Rik	0.337529	0.471689	0.28427	0.443348	0.486902	0.312559	-0.197109	0.151085	False	False		Adck5	0.105712	0.0117771	0.0231941	0.0356481	0.0372535	0.0111671	False	False
ACBD5_+_27529701.23-P1P2|ACBD5_+_27529710.23-P1P2	ACBD5	0.901716	0.0449301	-0.159127	0.0166328	0.229582	0.639062	-0.185127	0.314515	False	False		1700031F05Rik	0.0219006	1.65954	0.452271	2.48167	0.25396	0.595235	-0.593524	0.866384	False	False		Adcy1	1.74045	-0.13049	4.23108	0.726205	0.173348	1.05856	False	False
ACBD6_+_180471319.23-P1P2|ACBD6_+_180471354.23-P1P2	ACBD6	0.574276	0.240879	-0.371203	0.208015	0.532742	0.273483	-0.333749	0.242649	False	False		1700034E13Rik	0.375465	0.425431	0.129869	0.18268	0.982575	0.00763408	-0.276724	0.00518069	False	False		Adcy10	0.646678	-0.0468606	0.564559	0.884076	0.160033	1.1897	False	False
ACBD7_+_15130776.23-P1P2|ACBD7_+_15130765.23-P1P2	ACBD7	0.0020387	2.69065	-2.47975	15.522	0.465237	0.332326	0.297678	0.26299	True	False		1700034J05Rik	0.227736	0.642568	0.149798	0.318261	0.865305	0.0628308	0.0778631	0.0119974	False	False		Adcy2	1.61559	-0.0871732	2.62378	0.903172	0.177478	1.34788	False	False
ACCS_+_44088091.23-P1P2|ACCS_-_44088090.23-P1P2	ACCS	0.870575	0.0601937	-0.142875	0.0200075	0.786615	0.104238	-0.21977	0.0609005	False	False		1700034O15Rik	0.59289	0.227026	0.000176459	0.000132458	0.205252	0.687712	-0.347023	0.58526	False	False		Adcy3	0.213439	0.0525688	0.209034	0.32179	-0.095963	0.259666	False	False
ACCSL_-_44069582.23-ENST00000378832.1|ACCSL_+_44069616.23-ENST00000378832.1	ACCSL	0.845308	0.0729848	-0.128702	0.0218526	0.897462	0.0469839	-0.00617453	0.000771225	False	False		1700037C18Rik	0.0945856	1.02417	0.463312	1.56894	0.248845	0.604072	-0.577007	0.854778	False	False		Adcy4	1.64553	-0.11668	3.57697	1.29322	0.207032	2.25137	False	False
ACD_-_67694143.23-P1P2|ACD_+_67694124.23-P1P2	ACD	0.623129	0.205422	-0.327737	0.156623	0.11096	0.954833	-0.247411	0.628021	False	False		1700037H04Rik	0.77704	0.109557	0.163848	0.0593521	0.525071	0.279782	-0.359103	0.24639	False	False		Adcy5	0.272525	-0.0551221	0.279863	0.411942	-0.0779367	0.26997	False	False
ACE_-_61554428.23-P1|ACE_+_61554448.23-P1	ACE	0.188449	0.724807	0.221441	0.373391	0.146481	0.834219	-0.273364	0.606246	False	False		1700039E15Rik	0.565776	0.247355	0.11509	0.0941271	0.0979741	1.00889	0.67713	1.67533	False	False		Adcy6	0.25236	-0.0130805	0.0614976	0.55487	-0.0804942	0.375573	False	False
ACE_-_61562443.23-P2|ACE_+_61562272.23-P2	ACE	0.631589	0.199565	-0.315324	0.146395	0.216002	0.665541	0.427495	0.756369	False	False		1700040L02Rik	0.821003	0.085655	-0.137433	0.0389225	0.84588	0.072691	-0.181808	0.0324099	False	False		Adcy7	0.0712221	-0.0250471	0.0332343	0.0955966	-0.0469964	0.0377786	False	False
ACE2_-_15619013.23-P1P2|ACE2_-_15618975.23-P1P2	ACE2	0.9195	0.0364483	-0.212074	0.0179824	0.550138	0.259528	-0.324139	0.223637	False	False		1700042B14Rik	0.305878	0.514452	-0.209532	0.356412	0.131073	0.882485	0.407814	0.882578	False	False		Adcy8	0.332524	0.0418381	0.259184	1.8701	-0.261251	4.10829	False	False
ACER1_-_6333545.23-P1P2|ACER1_-_6333558.23-P1P2	ACER1	0.493377	0.306821	0.11986	0.0855547	0.939598	0.0270577	-0.102907	0.00740229	False	False		1700042G07Rik	0.747386	0.126455	0.0263124	0.0110016	0.216672	0.664196	0.739323	1.20424	False	False		Adcy9	0.179157	-0.0254719	0.0850177	0.397279	0.107074	0.357701	False	False
ACER2_+_19409007.23-P1P2|ACER2_-_19409274.23-P1P2	ACER2	0.143786	0.842283	0.0333023	0.0652553	0.28859	0.539719	0.119225	0.171067	False	False		1700047I17Rik2	0.56724	0.246233	-0.300194	0.244403	0.499764	0.301235	0.182107	0.134529	False	False		Adcyap1	0.131938	0.0110362	0.0271271	0.118608	0.0711584	0.0709705	False	False
ACER3_-_76572003.23-P1P2|ACER3_-_76571978.23-P1P2	ACER3	0.196412	0.706833	-0.0903548	0.148577	0.0421734	1.37496	-0.466295	1.70443	False	False		1700049G17Rik	0.474293	0.323953	-0.219281	0.234877	0.651203	0.186283	-0.0319462	0.0145941	False	False		Add1	0.0572876	-0.0560537	0.0598244	0.466739	0.0190125	0.0746193	False	False
ACHE_+_100493473.23-P1|ACHE_-_100493486.23-P1	ACHE	0.314301	0.502654	0.177528	0.207596	0.807678	0.0927616	0.0460249	0.0113498	False	False		1700052N19Rik	0.133191	0.875526	-0.421241	1.21943	0.27515	0.560431	0.319686	0.439369	False	False		Adh1	0.34941	-0.0105427	0.0686277	0.0250924	0.00918483	0.00193799	False	False
ACHE_+_100494559.23-P2|ACHE_-_100494578.23-P2	ACHE	0.982224	0.00778961	-0.195842	0.00354899	0.312523	0.505117	0.61647	0.827814	False	False		1700054O13Rik	0.0431144	1.36538	0.543556	2.45389	0.728397	0.137632	0.0873233	0.0294736	False	False		Adh4	0.065372	-0.0358573	0.04367	1.47497	0.217515	2.69782	False	False
ACIN1_-_23540292.23-P2|ACIN1_-_23540730.23-P2	ACIN1	0.923933	0.0343594	-0.240706	0.0192404	0.349239	0.456877	0.346777	0.42119	False	False		1700055N04Rik	0.710573	0.148391	-0.198025	0.0971597	0.532215	0.273913	0.162124	0.108904	False	False		Adh5	0.0315835	-0.00543984	0.00320081	0.248683	-0.0507979	0.106226	False	False
ACIN1_-_23564284.23-P1|ACIN1_+_23563962.23-P1	ACIN1	0.189355	0.722724	-0.695597	1.16954	0.881013	0.0550176	0.0608501	0.00890002	False	False		1700056E22Rik	0.68128	0.166674	0.147379	0.0812197	0.939648	0.0270349	0.32844	0.0217753	False	False		Adh7	0.54841	0.0306479	0.313126	0.544549	-0.078291	0.358499	False	False
ACKR2_-_42851020.23-P1P2|ACKR2_-_42850976.23-P1P2	ACKR2	0.0632363	1.19903	0.134241	0.374456	0.0961265	1.01716	-0.145855	0.394401	False	False		1700057G04Rik	0.121855	0.914156	0.0918996	0.277774	0.297516	0.52649	0.339644	0.438529	False	False		Adhfe1	0.288358	-0.0445157	0.239144	0.579963	-0.0820265	0.400031	False	False
ACKR3_-_237476505.23-P2|ACKR3_-_237476493.23-P2	ACKR3	0.123036	0.909969	0.196779	0.416572	0.429832	0.366702	-0.4364	0.425428	False	False		1700061G19Rik	0.292134	0.534418	-0.347064	0.613266	0.0661383	1.17955	0.801967	2.31982	False	False		Adk	0.620946	0.0577705	0.668304	0.569453	0.0844138	0.404212	False	False
ACKR3_+_237478500.23-P1|ACKR3_-_237478615.23-P1	ACKR3	0.386364	0.413003	0.00574678	0.00552156	0.117065	0.931575	0.422971	1.04751	False	False		1700065D16Rik	0.434754	0.361756	-0.0548901	0.065655	0.225742	0.646388	0.589084	0.9338	False	False		Adm	1.19595	0.128914	2.87229	0.0918462	-0.0833125	0.0643442	False	False
ACKR4_-_132316171.23-P1P2|ACKR4_-_132316167.23-P1P2	ACKR4	0.812232	0.0903201	-0.294222	0.0618219	0.350048	0.455872	0.561565	0.680568	False	False		1700065I17Rik	0.997125	0.00125022	0.172135	0.000711563	0.4203	0.376441	-0.313341	0.289267	False	False		Adm2	0.213439	-0.00792492	0.0315125	0.0770848	-0.0435478	0.0282275	False	False
ACLY_-_40075227.23-P1P2|ACLY_+_40075121.23-P1P2	ACLY	0.0282974	1.54825	-3.23435	11.6496	0.00682085	2.16616	0.599741	3.45368	True	False		1700066B19Rik	0.172337	0.763621	-0.240955	0.608374	0.200604	0.697661	0.170248	0.29128	False	False		Adora1	1.02753	0.0849657	1.62649	0.000519489	-0.149439	0.000652798	False	False
ACMSD_+_135596183.23-P1P2|ACMSD_-_135596200.23-P1P2	ACMSD	0.744349	0.128223	-0.0725163	0.0216315	0.626525	0.203061	0.0347828	0.0187768	False	False		1700066M21Rik	0.408125	0.389207	0.181964	0.234166	0.351792	0.453714	-0.413111	0.459656	False	False		Adora2a	1.10058	-0.0697176	1.42948	0.286932	0.0175639	0.0423777	False	False
ACN9_+_96747061.23-P1P2|ACN9_-_96747046.23-P1P2	ACN9	0.281109	0.551125	0.222614	0.285421	0.415876	0.381036	0.556112	0.563322	False	False		1700067K01Rik	0.989652	0.00451761	-0.225137	0.0033629	0.363588	0.439391	-0.106341	0.114587	False	False		Adora2b	0.822426	0.0754359	1.15582	0.00469778	0.0645001	0.00254795	False	False
ACO1_+_32384680.23-P1P2|ACO1_-_32384733.23-P1P2	ACO1	0.936472	0.0285051	-0.225199	0.0149339	0.344771	0.46247	0.321703	0.395519	False	False		1700067P10Rik	0.351805	0.453698	-0.263656	0.395514	0.12903	0.889308	-0.436944	0.952931	False	False		Adora3	0.197532	-0.0522215	0.192177	0.0317226	-0.0140221	0.00374042	False	False
ACO2_+_41865228.23-P1P2|ACO2_+_41865345.23-P1P2	ACO2	0.013615	1.86598	-2.99915	13.0194	0.66944	0.174288	0.416437	0.192951	True	False		1700074P13Rik	0.25794	0.588481	-0.948313	1.84519	0.501545	0.29969	0.290256	0.213323	False	False		Adprhl1	0.382452	-0.00897233	0.0639287	0.440602	0.0630263	0.233511	False	False
ACOT1_-_74004062.23-P1P2|ACOT1_-_74004076.23-P1P2	ACOT1	0.349246	0.456868	0.06986	0.0742512	0.389456	0.409541	-0.388689	0.423183	False	False		1700080E11Rik	0.756683	0.121086	0.137263	0.0549546	0.537966	0.269246	0.146506	0.096736	False	False		Adra1a	0.793816	0.104626	1.5473	0.39546	0.0757114	0.251769	False	False
ACOT11_-_55013950.23-P1|ACOT11_-_55013905.23-P1	ACOT11	0.860281	0.0653594	-0.124757	0.0189695	0.886206	0.0524652	-0.146206	0.0203923	False	False		1700080O16Rik	0.864403	0.0632836	0.00426377	0.000892158	0.255783	0.592129	-0.386735	0.561583	False	False		Adra1b	0.142444	-0.00310759	0.00824673	0.157541	0.0368013	0.0487522	False	False
ACOT11_+_55007963.23-P2|ACOT11_-_55008004.23-P2	ACOT11	0.0844876	1.07321	-1.25453	3.13218	0.399674	0.398294	-0.530616	0.561839	False	False		1700084C01Rik	0.676531	0.169712	-0.0738585	0.041445	0.692616	0.159507	0.176063	0.0688705	False	False		Adra1d	0.191829	-0.0556767	0.198977	0.0603447	0.0252229	0.0127989	False	False
ACOT12_-_80689897.23-P1P2|ACOT12_+_80689672.23-P1P2	ACOT12	0.0741145	1.1301	0.341682	0.8983	0.0452668	1.34422	-0.581161	2.0768	False	False		1700088E04Rik	0.651523	0.18607	-1.5902	0.978333	0.92658	0.0331171	0.227595	0.0184841	False	False		Adra2a	0.194675	-0.0337989	0.122582	0.0698473	0.0184431	0.0108323	False	False
ACOT13_-_24667371.23-P1P2|ACOT13_-_24667329.23-P1P2	ACOT13	0.0691776	1.16003	0.526943	1.42206	0.0738003	1.13194	-1.15479	3.475	False	False		1700092M07Rik	0.0358823	1.44512	0.439669	2.10081	0.424088	0.372544	-0.30698	0.28046	False	False		Adra2b	0.223735	0.024761	0.103208	0.033953	0.067534	0.0192814	False	False
ACOT2_+_74035740.23-P1P2|ACOT2_-_74036051.23-P1P2	ACOT2	0.315943	0.500391	0.0373227	0.0434476	0.833705	0.0789875	0.120066	0.025212	False	False		1700093K21Rik	0.956328	0.0193932	-0.121573	0.00779548	0.843031	0.0741562	-0.270469	0.0491868	False	False		Adra2c	0.201838	-0.0226311	0.0850983	0.272391	-0.116364	0.266533	False	False
ACOT4_+_74058647.23-P1P2|ACOT4_+_74058635.23-P1P2	ACOT4	0.0320998	1.4935	-3.60345	12.5201	0.260843	0.583622	-2.13294	3.30932	True	False		1700094D03Rik	0.92308	0.0347606	-0.057933	0.00665841	0.0557228	1.25397	-0.902578	2.77559	False	False		Adrb1	0.623073	0.0537149	0.623516	0.0993711	0.0804216	0.0672003	False	False
ACOT6_+_74077704.23-P1P2|ACOT6_+_74077926.23-P1P2	ACOT6	0.251321	0.599771	-0.394062	0.549837	0.117285	0.930756	0.384156	0.950543	False	False		1700101E01Rik	0.170532	0.768195	-0.49341	1.25325	0.285528	0.544351	0.517313	0.690583	False	False		Adrb2	0.59984	-0.0574214	0.641687	0.130443	0.0613934	0.0673413	False	False
ACOT7_-_6453406.23-P1P2|ACOT7_-_6453369.23-P1P2	ACOT7	0.878151	0.0564307	-0.15763	0.0206937	0.340838	0.467452	0.201501	0.250404	False	False		1700102P08Rik	0.445852	0.350809	0.166322	0.19292	0.731681	0.135678	0.69262	0.230457	False	False		Adrb3	0.129338	-0.034475	0.08307	0.135774	-0.0343096	0.0391717	False	False
ACOT8_-_44486001.23-P1P2|ACOT8_-_44485992.23-P1P2	ACOT8	0.927868	0.0325138	-0.19919	0.0150667	0.492767	0.307359	0.134573	0.109959	False	False		1700106J16Rik	0.34816	0.458221	0.160274	0.242825	0.774239	0.111125	0.0171307	0.00466842	False	False		Adrbk1	0.0283269	-0.0152006	0.00802181	0.28044	0.0634995	0.149744	False	False
ACOT9_+_23761360.23-P1P2|ACOT9_-_23761316.23-P1P2	ACOT9	0.0530414	1.27539	0.640256	1.89967	0.131586	0.880791	-0.506938	1.18702	False	False		1700109H08Rik	0.121335	0.916014	0.400311	1.21243	0.11925	0.923543	-0.296024	0.670452	False	False		Adrbk2	0.0165739	0.0144788	0.00447066	0.514059	-0.15713	0.679221	False	False
ACOX1_-_73975196.23-P1P2|ACOX1_-_73975193.23-P1P2	ACOX1	0.301372	0.520897	-0.209184	0.253492	0.0978618	1.00939	-0.615322	1.65116	False	False		1700110M21Rik	0.895094	0.0481315	0.052797	0.00840226	0.0543399	1.26488	-1.16302	3.60763	False	False		Adss	0.238676	0.0164901	0.0733239	0.46095	-0.111912	0.433779	False	False
ACOX2_+_58512428.23-P2|ACOX2_-_58512435.23-P2	ACOX2	0.136223	0.865748	0.0794727	0.160064	0.503133	0.298317	0.107566	0.0853065	False	False		1700112E06Rik	0.436451	0.360065	0.411244	0.489595	0.814661	0.0890232	0.169255	0.0369513	False	False		Adssl1	0.0977167	0.00688997	0.012543	0.366768	0.0735482	0.226831	False	False
ACOX2_+_58522893.23-P1|ACOX2_+_58522888.23-P1	ACOX2	0.130107	0.8857	-0.807164	1.66315	0.22487	0.648068	0.313192	0.539584	False	False		1700113H08Rik	0.264054	0.578308	-0.133057	0.254422	0.818619	0.0869182	0.421933	0.089937	False	False		Afap1l2	1.47309	-0.117239	3.21746	0.00785768	0.121349	0.00801803	False	False
ACOX3_-_8442435.23-P2|ACOX3_+_8442383.23-P2	ACOX3	0.335834	0.473875	0.17026	0.187698	0.715057	0.145659	0.0732666	0.0283708	False	False		1700122O11Rik	0.783122	0.10617	-0.169156	0.0593809	0.318233	0.497254	-0.162031	0.197588	False	False		Aff1	0.629474	0.0480441	0.563419	0.782879	-0.0937611	0.617243	False	False
ACOX3_+_8430113.23-P1|ACOX3_-_8430129.23-P1	ACOX3	0.647191	0.188967	-0.302635	0.133042	0.0795864	1.09916	0.401944	1.17451	False	False		1700123I01Rik	0.164543	0.783719	0.777156	2.01385	0.126673	0.897317	-0.930627	2.04788	False	False		Aff3	0.640517	-0.0441783	0.527173	0.305425	-0.0682402	0.17526	False	False
ACOXL_+_111490271.23-P1P2|ACOXL_+_111490261.23-P1P2	ACOXL	0.00935556	2.02893	-2.22337	10.4945	0.551497	0.258457	0.255469	0.175532	True	False		1700123K08Rik	0.447574	0.349135	0.0529874	0.0611679	0.35785	0.4463	0.106812	0.116904	False	False		Aff4	0.400013	-0.037048	0.276091	0.222602	0.122395	0.229102	False	False
ACP1_-_264970.23-P1P2|ACP1_-_264967.23-P1P2	ACP1	0.0927796	1.03255	-5.20307	12.4984	0.386858	0.412449	1.99499	2.18745	True	False		1700123O20Rik	0.743568	0.128679	0.0731238	0.0311118	0.445928	0.350735	-0.310186	0.2668	False	False		Afg3l2	0.451204	-0.0645698	0.54277	0.421205	0.153918	0.545155	False	False
ACP2_+_47270332.23-P1P2|ACP2_+_47270309.23-P1P2	ACP2	0.0246921	1.60744	0.698577	2.61236	0.149315	0.825896	0.468493	1.02862	False	False		1700125H20Rik	0.828296	0.0818143	0.115451	0.031231	0.436	0.360513	-0.301009	0.266124	False	False		Afmid	2.44288	-0.176064	8.01284	1.9473	0.27515	4.50548	True	False
ACP5_-_11688064.23-P1|ACP5_-_11688455.23-P1	ACP5	0.0141802	1.84832	-1.40968	6.06151	0.813932	0.0894121	0.0459391	0.0109196	False	False		1700129C05Rik	0.132262	0.878564	0.370162	1.07528	0.72239	0.141228	-0.444054	0.153795	False	False		Afp	1.56302	0.110088	3.20566	0.298406	0.149836	0.375979	False	False
ACP5_-_11689771.23-P2|ACP5_-_11689727.23-P2	ACP5	0.0667619	1.17547	0.416522	1.13903	0.037876	1.42164	0.100063	0.378171	False	False		1810009A15Rik	0.354865	0.449937	-0.247726	0.368537	0.320356	0.494367	-0.470607	0.570548	False	False		Agap2	0.0370601	-0.0719239	0.0496585	0.181448	-0.0551372	0.0841268	False	False
ACP6_-_147142356.23-P1P2|ACP6_-_147142348.23-P1P2	ACP6	0.258626	0.587328	0.104812	0.143211	0.119217	0.923662	-0.346891	0.851793	False	False		1810009J06Rik	0.233623	0.631485	0.297832	0.621859	0.774239	0.111125	0.282572	0.0770059	False	False		Agfg2	0.646678	0.0156132	0.188102	0.969577	-0.147164	1.19984	False	False
ACPL2_-_140950647.23-P1P2|ACPL2_+_140950963.23-P1P2	ACPL2	0.934851	0.0292575	-0.205967	0.0140191	0.531909	0.274163	0.233626	0.170278	False	False		1810011H11Rik	0.568065	0.245602	-0.213743	0.173573	0.39287	0.405751	0.21032	0.209278	False	False		Agpat2	0.301228	0.00564066	0.0316548	0.191527	-0.0640617	0.103173	False	False
ACPP_+_132036293.23-P1P2|ACPP_+_132036344.23-P1P2	ACPP	0.487735	0.311816	-0.00781287	0.00566752	0.483072	0.315988	-0.661935	0.556051	False	False		1810011O10Rik	0.0502594	1.29878	0.609754	2.61848	0.55199	0.258068	-0.219468	0.138896	False	False		Agt	0.620946	-0.0505462	0.584731	0.109555	-0.0143143	0.0131868	False	False
ACPT_+_51293697.23-ENST00000270593.1|ACPT_+_51293762.23-ENST00000270593.1	ACPT	0.0451593	1.34525	0.0650181	0.20348	0.164779	0.783098	0.29168	0.607226	False	False		1810013L24Rik	0.13375	0.873706	-0.391849	1.13199	0.402886	0.394818	0.471084	0.45612	False	False		Agtr1a	0.661893	-0.065147	0.803334	0.618461	0.154766	0.804868	False	False
ACR_-_51176666.23-P1P2|ACR_-_51176714.23-P1P2	ACR	0.115142	0.938766	0.445903	0.973825	0.670347	0.1737	0.17737	0.0819048	False	False		1810019J16Rik	0.695604	0.157638	-0.0964931	0.0502939	0.199326	0.700435	-0.420332	0.722012	False	False		Agtr2	0.0370601	0.00330252	0.00228016	0.410098	-0.18844	0.649831	False	False
ACRBP_+_6756569.23-P1P2|ACRBP_+_6756572.23-P1P2	ACRBP	0.0312829	1.50469	0.16358	0.572614	0.0941032	1.0264	-0.317486	0.866298	False	False		1810022K09Rik	0.788663	0.103108	0.00702137	0.00239372	0.566192	0.247036	0.136922	0.08295	False	False		Agxt	0.17083	-0.0164545	0.0523676	0.261246	-0.0886782	0.194807	False	False
ACRC_-_70798376.23-P1P2|ACRC_-_70798359.23-P1P2	ACRC	0.125929	0.899874	-0.0826249	0.172972	0.00549727	2.25985	0.225965	1.35753	False	False		1810024B03Rik	0.251696	0.599124	-0.326688	0.647154	0.202193	0.694233	0.380569	0.647922	False	False		Agxt2	0.0304955	0.00337813	0.00191923	0.156159	0.0273719	0.0359428	False	False
ACRV1_+_125550697.23-P1P2|ACRV1_-_125550695.23-P1P2	ACRV1	0.27345	0.563123	0.084808	0.111102	0.819351	0.08653	0.0400167	0.00920526	False	False		1810026J23Rik	0.00448837	2.34791	-0.953787	7.40441	0.738844	0.131447	-0.103361	0.033319	False	False		Ahcy	1.19595	-0.100988	2.25007	0.782879	0.0972487	0.640202	False	False
ACSBG1_+_78526846.23-P1P2|ACSBG1_-_78526810.23-P1P2	ACSBG1	0.447368	0.349335	0.234837	0.19085	0.77464	0.1109	0.0214417	0.0063215	False	False		1810030O07Rik	0.0543691	1.26465	0.408681	1.70888	0.543264	0.264989	-0.153869	0.0999914	False	False		Ahcyl2	0.74254	-0.0631159	0.873116	0.106993	0.0118782	0.0106867	False	False
ACSBG2_-_6135704.23-P1P2|ACSBG2_-_6135684.23-P1P2	ACSBG2	0.152825	0.815807	0.115822	0.219817	0.782371	0.106587	-0.146354	0.0414704	False	False		1810033B17Rik	0.876317	0.0573389	-0.33681	0.0638546	0.20086	0.697106	0.271686	0.464461	False	False		Ahnak	0.445609	0.0261964	0.217475	0.0698473	-0.0356162	0.0209187	False	False
ACSF2_-_48503625.23-P1P2|ACSF2_-_48503778.23-P1P2	ACSF2	0.0499215	1.30171	-1.53591	4.65119	0.719887	0.142736	0.149322	0.0566609	False	False		1810037I17Rik	0.04223	1.37438	0.631601	2.87016	0.599152	0.222463	-0.134412	0.0733297	False	False		Ahr	0.900949	-0.14631	2.45577	0.744887	-0.255609	1.60105	False	False
ACSF3_+_89160267.23-P1P2|ACSF3_-_89160263.23-P1P2	ACSF3	0.777056	0.109548	-0.28434	0.0724645	0.856152	0.0674492	0.0681289	0.0122162	False	False		1810041L15Rik	0.806465	0.0934145	0.0206277	0.00637123	0.2263	0.645315	0.43656	0.690875	False	False		AI314180	0.42167	0.0531308	0.417381	0.192979	0.064619	0.104859	False	False
ACSL1_+_185747071.23-P1P2|ACSL1_+_185747074.23-P1P2	ACSL1	0.673192	0.171861	-0.196972	0.078753	0.4718	0.326242	0.090715	0.0786769	False	False		1810043G02Rik	0.115725	0.936573	-0.499969	1.54825	0.124516	0.904774	0.494142	1.09642	False	False		Aicda	0.196102	-0.0361124	0.131933	0.0993711	0.0551876	0.0461147	False	False
ACSL3_-_223726162.23-P1P2|ACSL3_-_223725828.23-P1P2	ACSL3	0.0261401	1.58269	-0.688124	2.53365	0.452906	0.343992	-0.235029	0.214931	False	False		1810043H04Rik	0.171884	0.764763	0.461733	1.16755	0.911311	0.0403333	0.301853	0.0298567	False	False		Aif1	0.614582	-0.0673095	0.770673	0.0487018	0.0174838	0.00716011	False	False
ACSL4_-_108976106.23-P1P2|ACSL4_-_108976456.23-P1P2	ACSL4	0.352599	0.452719	-0.351456	0.370155	0.0270157	1.56838	-0.699995	2.9186	False	False		1810046K07Rik	0.575075	0.240275	0.19594	0.155665	0.940806	0.0264998	0.129091	0.00838926	False	False		Aifm1	0.2004	-0.0254306	0.0949439	0.571548	0.0891442	0.428434	False	False
ACSL5_-_114133956.23-P2|ACSL5_-_114133923.23-P2	ACSL5	0.156893	0.804397	0.0488032	0.0913278	0.990864	0.00398575	-0.0302759	0.000320801	False	False		1810055G02Rik	0.441565	0.355006	0.156508	0.183708	0.788211	0.103357	-0.0322592	0.00817671	False	False		Aifm2	0.324188	0.0324852	0.196199	0.415638	-0.202366	0.707279	False	False
ACSL5_-_114136040.23-P1|ACSL5_-_114136013.23-P1	ACSL5	0.134631	0.870856	0.326818	0.662118	0.919548	0.0364257	-0.0747452	0.00723802	False	False		1810062G17Rik	0.14197	0.847802	0.381412	1.06917	0.267537	0.572616	-0.332213	0.466513	False	False		Aim1	0.646678	0.0914356	1.10158	0.58419	-0.119572	0.587382	False	False
ACSL6_-_131310682.23-P2|ACSL6_+_131310427.23-P2	ACSL6	0.250341	0.601468	0.0855441	0.119698	0.04733	1.32486	0.645819	2.27463	False	False		1810065E05Rik	0.616522	0.210052	-0.401901	0.279128	0.363203	0.43985	0.172706	0.186293	False	False		Ajuba	0.931235	0.0622007	1.07912	0.891699	-0.132354	0.992415	False	False
ACSL6_-_131347437.23-P1|ACSL6_-_131347379.23-P1	ACSL6	0.180286	0.744038	-1.41563	2.45034	0.724063	0.140223	0.29437	0.109734	False	False		2010001E11Rik	0.834479	0.0785848	-0.0805987	0.0209423	0.19055	0.719991	0.378899	0.669012	False	False		Ak1	0.325849	-0.0421274	0.255738	0.344025	0.0314944	0.0911092	False	False
ACSM1_-_20687076.23-P1P2|ACSM1_-_20687521.23-P1P2	ACSM1	0.18809	0.725634	0.0392194	0.0662068	0.59838	0.223023	0.172497	0.102272	False	False		2010002M12Rik	0.831105	0.0803441	0.100238	0.0266284	0.898047	0.046701	0.414809	0.047507	False	False		Ak2	1.81689	-0.08798	2.97801	0.438072	0.111194	0.409606	False	False
ACSM2A_-_20463283.23-P1P2|ACSM2A_-_20462920.23-P1P2	ACSM2A	0.545942	0.262854	0.12086	0.073906	0.611624	0.213516	0.208934	0.118595	False	False		2010003K11Rik	0.775936	0.110174	0.0715477	0.0260635	0.987222	0.00558538	-0.0322379	0.000441574	False	False		Ak3	0.0723996	-0.0111451	0.0150327	0.67365	-0.122392	0.693308	False	False
ACSM2B_+_20587573.23-P1P2|ACSM2B_-_20587615.23-P1P2	ACSM2B	0.932745	0.0302372	-0.169829	0.0119464	0.47636	0.322065	0.276447	0.236692	False	False		2010005H15Rik	0.0156847	1.80452	0.42042	2.50844	0.899904	0.0458037	-0.0762208	0.00856167	False	False		Ak4	1.2103	-0.0799285	1.80222	0.0627046	0.01921	0.010129	False	False
ACSM3_+_20775331.23-P1P2|ACSM3_+_20775412.23-P1P2	ACSM3	0.074953	1.12521	0.332983	0.871646	0.474257	0.323986	-0.285676	0.246053	False	False		2010012O05Rik	0.394783	0.403642	0.135719	0.181132	0.881363	0.054845	0.104013	0.0139897	False	False		Ak5	0.0197501	-0.003252	0.00119656	0.000519489	0.0353584	0.000154457	False	False
ACSM4_-_7456922.23-ENST00000399422.4|ACSM4_+_7456915.23-ENST00000399422.4	ACSM4	0.902287	0.0446554	-0.269149	0.0279608	0.576474	0.23922	0.448688	0.285345	False	False		2010015L04Rik	0.708428	0.149704	0.0743211	0.0367878	0.891713	0.0497749	0.0261606	0.00319332	False	False		Ak7	0.631614	-0.0483791	0.569276	0.766155	0.154226	0.993602	False	False
ACSM5_-_20421144.23-P1P2|ACSM5_-_20420881.23-P1P2	ACSM5	0.000210465	3.67682	0.091921	0.786269	0.110625	0.956146	-0.40305	1.0245	False	False		2010106E10Rik	0.893954	0.0486849	-0.159169	0.0256218	0.99303	0.00303775	-0.0360982	0.000268919	False	False		Ak8	0.226701	0.0138712	0.0585843	0.149295	0.0308716	0.0387565	False	False
ACSS1_+_25038767.23-P1P2|ACSS1_+_25038734.23-P1P2	ACSS1	0.0883992	1.05355	-1.30808	3.20608	0.670362	0.173691	0.183989	0.0849563	False	False		2010107E04Rik	0.908787	0.0415378	-0.492434	0.0676315	0.154032	0.81239	1.14246	2.27609	False	False		Akap1	0.0561427	0.0186435	0.0195	0.248683	-0.0999303	0.208969	False	False
ACSS2_-_33464845.23-P1P2|ACSS2_-_33464420.23-P1P2	ACSS2	0.0561035	1.25101	-1.2336	3.5902	0.942489	0.0257238	-0.00967977	0.000661954	False	False		2010107G12Rik	0.554134	0.256385	-0.00792553	0.00671859	0.814096	0.0893245	-0.0807804	0.0176954	False	False		Akap10	0.209068	-0.0378832	0.147553	0.0533277	0.0500235	0.0224319	False	False
ACSS3_-_81471913.23-P1P2|ACSS3_-_81471886.23-P1P2	ACSS3	0.100584	0.99747	0.135453	0.314319	0.709585	0.148996	-0.121821	0.048253	False	False		2010107G23Rik	0.550761	0.259037	-0.09087	0.0778287	0.5227	0.281747	-0.0511183	0.03532	False	False		Akap11	0	0.00253039	0	0.328578	0.0613521	0.169514	False	False
ACTA1_-_229568745.23-P2|ACTA1_-_229568723.23-P2	ACTA1	0.78131	0.107177	-0.10662	0.0265842	0.812383	0.0902394	0.104759	0.0251313	False	False		2010109A12Rik	0.364312	0.438527	-0.433563	0.628646	0.113328	0.945664	0.733393	1.70082	False	False		Akap12	0.188994	0.00666509	0.0234676	0.19735	-0.000297851	0.000494281	False	False
ACTA1_+_229569796.23-P1|ACTA1_+_229569744.23-P1	ACTA1	0.0758986	1.11977	-6.01043	15.6573	0.169124	0.771794	-3.93038	8.06427	True	False		2010109I03Rik	0.472514	0.325585	0.192253	0.206964	0.827116	0.0824334	-0.0950544	0.0192158	False	False		Akap13	0.371792	0.0623025	0.431538	0.0544907	-0.0666279	0.0305293	False	False
ACTA2_-_90712506.23-P1|ACTA2_+_90712479.23-P1	ACTA2	0.456197	0.340848	-0.763299	0.605255	0.602953	0.219717	0.578832	0.338099	False	False		2010111I01Rik	0.361272	0.442166	-0.231356	0.338239	0.510407	0.292084	-0.167681	0.120108	False	False		Akap14	0.796182	0.0539084	0.799618	0.191527	0.0594966	0.0958211	False	False
ACTA2_+_90751072.23-P2|ACTA2_-_90751066.23-P2	ACTA2	0.777371	0.109371	-0.224916	0.057228	0.369678	0.432176	0.309059	0.355083	False	False		2010300C02Rik	0.23193	0.634643	-0.294374	0.617713	0.0368052	1.43409	0.548716	1.92978	False	False		Akap2	0.335878	-0.0786552	0.492178	0.315049	0.0626734	0.166035	False	False
ACTB_-_5570191.23-P1P2|ACTB_+_5570130.23-P1P2	ACTB	0.245398	0.610128	-0.849326	1.20553	0.506559	0.29537	-0.445219	0.349597	False	False		2010315B03Rik	0.694007	0.158636	-0.155534	0.0815804	0.149047	0.826677	0.511917	1.03781	False	False		Akap3	0.69199	-0.0501121	0.646036	0.192248	-0.0185738	0.0300263	False	False
ACTBL2_-_56778433.23-P1P2|ACTBL2_-_56778438.23-P1P2	ACTBL2	0.214958	0.667647	0.177988	0.276452	0.492334	0.30774	-0.456626	0.37357	False	False		2200002D01Rik	0.139638	0.854995	0.405994	1.14773	0.533171	0.273133	-0.249878	0.167373	False	False		Akap4	0.75406	-0.0654925	0.920049	0.203217	-0.0297305	0.0508044	False	False
ACTC1_-_35087711.23-P1P2|ACTC1_-_35087685.23-P1P2	ACTC1	0.766558	0.115455	-0.143101	0.038436	0.345249	0.461868	0.161073	0.197773	False	False		2200002J24Rik	0.175991	0.754511	-0.615445	1.53537	0.571795	0.24276	-0.0747057	0.0444748	False	False		Akap5	0.281991	0.0268776	0.141201	0.126473	-0.0309665	0.0329328	False	False
ACTG1_-_79479788.23-P1P2|ACTG1_-_79479780.23-P1P2	ACTG1	0.00396995	2.40121	-4.06613	22.7141	0.763767	0.117039	0.20848	0.0648669	True	False		2210010C04Rik	0.166301	0.779105	0.590429	1.52097	0.25275	0.597309	-0.239872	0.351368	False	False		Akap6	0.389343	-0.0446831	0.324108	0.131772	0.0317742	0.0352075	False	False
ACTG2_+_74120202.23-P1|ACTG2_-_74120192.23-P1	ACTG2	0.0238749	1.62206	0.0880744	0.332353	0.759124	0.119687	-0.0851391	0.0270898	False	False		2210016F16Rik	0.787	0.104025	-0.661989	0.227692	0.0461302	1.33602	-0.447754	1.46701	False	False		Akap7	0.0723996	0.0116675	0.0157372	1.01234	-0.17118	1.4572	False	False
ACTG2_+_74128454.23-P2|ACTG2_+_74128598.23-P2	ACTG2	0.845546	0.0728625	-0.126024	0.021362	0.656722	0.182619	-0.414833	0.201394	False	False		2210016L21Rik	0.0583712	1.2338	0.261785	1.06794	0.440732	0.355825	-0.292151	0.254934	False	False		Akap8	0.0272463	-0.020571	0.0104418	0.3201	0.0876919	0.236039	False	False
ACTL10_+_32254796.23-P1P2|ACTL10_-_32254768.23-P1P2	ACTL10	0.667164	0.175767	-0.490035	0.200378	0.195786	0.708217	0.542218	1.02087	False	False		2210018M11Rik	0.0338952	1.46986	-1.16946	5.68356	0.0699855	1.15499	1.19091	3.3732	False	False		Akap8l	0.320874	0.0146417	0.0875267	0.273995	0.0878475	0.2024	False	False
ACTL6A_-_179280784.23-P1P2|ACTL6A_+_179280755.23-P1P2	ACTL6A	0.122727	0.91106	-6.98668	14.8082	0.421241	0.375469	-1.89358	1.8901	True	False		2210404O07Rik	0.031035	1.50815	0.425504	2.1218	0.0965056	1.01545	-0.692168	1.72366	False	False		Akap9	0.261608	-0.0280411	0.136666	1.35458	0.184247	2.09866	False	False
ACTL6B_+_100253966.23-P1P2|ACTL6B_+_100253969.23-P1P2	ACTL6B	0.166651	0.778191	0.289118	0.523414	0.909135	0.0413718	-0.083209	0.00915171	False	False		2210404O09Rik	0.751757	0.123923	-0.0939208	0.0384831	0.422823	0.373842	0.339816	0.311541	False	False		Akp3	0.0855206	-0.00362819	0.00578062	0.0674559	-0.0321942	0.0182614	False	False
ACTL7A_-_111624608.23-P1P2|ACTL7A_-_111624563.23-P1P2	ACTL7A	0.908464	0.0416921	-0.136989	0.0132869	0.999895	4.55619e-05	-0.0378921	4.58965e-06	False	False		2210407C18Rik	0.78423	0.105557	0.120405	0.042023	0.078973	1.10252	-0.532342	1.43933	False	False		Akr1a1	0.103911	0.02258	0.0437119	0.496103	-0.121387	0.506386	False	False
ACTL7B_-_111618185.23-P1P2|ACTL7B_+_111618198.23-P1P2	ACTL7B	0.764971	0.116355	-0.24097	0.0652275	0.778412	0.10879	0.034822	0.010071	False	False		2210408I21Rik	0.719178	0.143163	-0.232635	0.11012	0.397179	0.401014	0.347775	0.342012	False	False		Akr1b3	0.203278	-0.0475133	0.179937	0.399101	-0.0710122	0.238317	False	False
ACTL8_-_18081836.23-P1P2|ACTL8_+_18081845.23-P1P2	ACTL8	0.170108	0.769275	0.0355883	0.0636902	0.456163	0.34088	-0.469651	0.425603	False	False		2300002M23Rik	0.30384	0.517355	-0.613597	1.04961	0.643878	0.191196	0.202973	0.0951705	False	False		Akr1b8	1.05431	0.0451043	0.885929	0.127794	0.0507188	0.0545026	False	False
ACTL9_-_8809073.23-P1P2|ACTL9_+_8808881.23-P1P2	ACTL9	0.46153	0.3358	-0.0869571	0.0679313	0.486932	0.312531	0.21088	0.175209	False	False		2300003K06Rik	0.299456	0.523667	-0.170506	0.295224	0.488271	0.311339	0.192418	0.146914	False	False		Akr1c18	0.554481	0.0400838	0.414066	0.0272922	0.0515323	0.0118265	False	False
ACTN1_-_69445956.23-P1P2|ACTN1_-_69445944.23-P1P2	ACTN1	0.484556	0.314656	-0.500824	0.366611	0.164593	0.783588	-0.64465	1.34289	False	False		2300005B03Rik	0.696136	0.157306	0.102949	0.0535457	0.465275	0.332291	-0.255629	0.208311	False	False		Akr1c21	0.281991	-0.0437496	0.229839	0.204691	-0.120098	0.206716	False	False
ACTN2_+_236849841.23-P1P2|ACTN2_+_236849796.23-P1P2	ACTN2	0.141199	0.85017	0.470853	0.931267	0.607458	0.216484	-0.569518	0.327764	False	False		2300009A05Rik	0.100261	0.998866	-0.817994	2.70156	0.809014	0.0920437	-0.0536503	0.0121102	False	False		Akr1c6	0.187581	0.0220537	0.0770698	0.112128	-0.0503166	0.047442	False	False
ACTN3_-_66314441.23-P1P2|ACTN3_+_66313715.23-P1P2	ACTN3	0.161855	0.790875	0.110163	0.202687	0.0624675	1.20435	0.288285	0.922999	False	False		2310002J15Rik	0.155965	0.806973	-0.258209	0.688951	0.0645438	1.19015	-0.739877	2.15945	False	False		Akr1d1	0.526381	0.0328038	0.32169	0.19589	-0.00875048	0.0144139	False	False
ACTN4_-_39138358.23-P1P2|ACTN4_-_39138303.23-P1P2	ACTN4	0.167951	0.774817	-0.568277	1.02434	0.341644	0.466426	-0.122034	0.151319	False	False		2310002L09Rik	0.0734763	1.13385	0.393499	1.47522	0.193527	0.713259	-0.437148	0.764645	False	False		Akt1	0.0723996	-0.0194615	0.0262498	0.033953	-0.0130607	0.00372892	False	False
ACTR10_+_58666892.23-P1P2|ACTR10_+_58666925.23-P1P2	ACTR10	0.128229	0.892013	-6.39345	13.2675	0.458901	0.338281	-2.69971	2.42786	True	False		2310003H01Rik	0.528376	0.277057	-0.0927377	0.0849537	0.342829	0.464923	-0.728828	0.830978	False	False		Akt2	1.42599	-0.104177	2.76758	0.41749	-0.0920385	0.323113	False	False
ACTR1A_+_104262452.23-P1P2|ACTR1A_+_104262449.23-P1P2	ACTR1A	0.848647	0.0712727	-0.210179	0.0348494	0.583674	0.23383	-0.227716	0.141554	False	False		2310005G13Rik	0.0971713	1.01246	0.25119	0.840889	0.928318	0.0323031	-0.137441	0.0108879	False	False		Akt3	0.039268	-0.00760539	0.00556383	0.809486	-0.00968865	0.0659494	False	False
ACTR1B_-_98280407.23-P1P2|ACTR1B_+_98280464.23-P1P2	ACTR1B	0.310255	0.508281	-0.0102326	0.0120997	0.534616	0.271958	0.101386	0.0733008	False	False		2310007B03Rik	0.870073	0.0604445	-0.230343	0.046035	0.491934	0.308094	0.118447	0.0894934	False	False		Alad	1.27144	0.0883348	2.09238	0.996206	-0.162568	1.36183	False	False
ACTR2_-_65454971.23-P1P2|ACTR2_-_65454953.23-P1P2	ACTR2	0.0199438	1.70019	-1.03969	4.11229	0.972389	0.0121601	-0.0264665	0.000855583	False	False		2310007L24Rik	0.00143748	2.8424	-0.804985	7.56537	0.0115311	1.93813	0.911072	4.33031	False	False		Alas1	0.304474	-0.0442633	0.251078	0.436186	-0.130769	0.479638	False	False
ACTR3_+_114648069.23-P1P2|ACTR3_+_114648124.23-P1P2	ACTR3	0.010129	1.99443	-1.58301	7.34491	0.562919	0.249554	-0.309528	0.205349	False	False		2310009B15Rik	0.170982	0.76705	-0.604467	1.53304	0.151524	0.819519	0.683832	1.37433	False	False		Alas2	0.451204	0.00805513	0.067711	0.259665	0.0171841	0.0375214	False	False
ACTR3B_-_152456898.23-P1P2|ACTR3B_-_152456932.23-P1P2	ACTR3B	0.852866	0.0691194	-0.150019	0.024123	0.893355	0.0489758	-0.0534292	0.00695647	False	False		2310011J03Rik	0.889966	0.0506264	-0.295062	0.0493909	0.585063	0.232797	0.168689	0.0963051	False	False		Alcam	1.52094	0.0749749	2.12442	0.00997678	0.0110418	0.000926338	False	False
ACTR3C_+_150020638.23-P1P2|ACTR3C_+_150020641.23-P1P2	ACTR3C	0.169103	0.771848	0.0683157	0.122669	0.396495	0.401763	0.248724	0.265653	False	False		2310014L17Rik	0.00144826	2.83915	0.52992	4.97459	0.514212	0.288857	-0.285297	0.202099	False	False		Aldh18a1	0.207617	0.00973498	0.037654	0.181448	-0.00937759	0.0143081	False	False
ACTR5_-_37377178.23-P1P2|ACTR5_+_37377152.23-P1P2	ACTR5	0.035069	1.45508	-3.48511	11.7974	0.693278	0.159093	-0.38912	0.164574	True	False		2310022A10Rik	0.0755863	1.12156	0.388143	1.43936	0.232791	0.633034	-0.0395277	0.0613639	False	False		Aldh1a1	0.0819116	0.0113159	0.0172683	0.282059	-0.064564	0.153133	False	False
ACTR6_-_100594606.23-P1P2|ACTR6_-_100594617.23-P1P2	ACTR6	0.0877485	1.05676	-8.52845	20.9667	0.162874	0.788147	4.40631	9.23231	True	False		2310022B05Rik	0.0897139	1.04714	-0.66193	2.29179	0.302267	0.519609	-0.253298	0.322768	False	False		Aldh1a2	0.0595849	-0.031844	0.035349	0.0131742	-0.0291135	0.00322521	False	False
ACTR8_+_53916142.23-P1P2|ACTR8_+_53916157.23-P1P2	ACTR8	0.0105604	1.97632	-3.24081	14.9003	0.252624	0.597525	-2.38783	3.79304	True	False		2310030G06Rik	0.948798	0.0228261	-0.0244911	0.00184841	0.528697	0.276793	-0.181071	0.12291	False	False		Aldh1a3	0.524397	0.0587027	0.573497	0.38641	0.051194	0.166344	False	False
ACTRT1_+_127186306.23-P1P2|ACTRT1_+_127186328.23-P1P2	ACTRT1	0.803284	0.0951309	-0.0572652	0.0126735	0.00732884	2.13497	0.199922	1.13469	False	False		2310033P09Rik	0.472514	0.325585	0.0674287	0.0725883	0.715856	0.145174	0.190138	0.0676929	False	False		Aldh1b1	0.377027	-0.0447349	0.314219	0.85638	0.138588	0.998	False	False
ACTRT2_-_2938118.23-P1P2|ACTRT2_+_2938135.23-P1P2	ACTRT2	0.581646	0.235342	-0.208223	0.114002	0.946414	0.023919	-0.0426456	0.00271172	False	False		2310035C23Rik	0.286558	0.542787	0.0231766	0.0415945	0.662254	0.178975	-0.258892	0.113631	False	False		Aldh1l1	0.0704551	0.00718105	0.00942572	0.118321	0.0476091	0.0473684	False	False
ACTRT3_+_169487327.23-P1P2|ACTRT3_+_169487342.23-P1P2	ACTRT3	0.117491	0.929997	0.124232	0.268781	0.669856	0.174018	0.0503003	0.0232698	False	False		2310036O22Rik	0.435178	0.361333	-0.339448	0.405545	0.625717	0.203622	-0.143644	0.0717291	False	False		Aldh2	0.00614327	0.0203667	0.00233096	0.0807392	-0.0855926	0.0581111	False	False
ACVR1_+_158732232.23-P1P2|ACVR1_+_158732079.23-P1P2	ACVR1	0.179179	0.746714	-0.524133	0.910499	0.256722	0.590537	-0.329854	0.517841	False	False		2310039H08Rik	0.616014	0.210409	0.139315	0.0969217	0.371327	0.430243	-0.422737	0.446034	False	False		Aldh3a1	0.0652221	0.00561298	0.00682028	0.496103	0.25308	1.05577	False	False
ACVR1B_-_52345530.23-P1P2|ACVR1B_+_52345561.23-P1P2	ACVR1B	0.114492	0.941225	0.302677	0.662759	0.187435	0.72715	0.320738	0.620016	False	False		2310042D19Rik	0.457983	0.339151	-0.287001	0.321836	0.243508	0.613487	0.253493	0.381378	False	False		Aldh3a2	0.679467	0.107619	1.36229	0.998887	-0.165693	1.39174	False	False
ACVR1C_+_158485339.23-P1P2|ACVR1C_-_158485307.23-P1P2	ACVR1C	0.116112	0.935122	0.0959984	0.208841	0.373431	0.42779	0.271185	0.308407	False	False		2310044G17Rik	0.212294	0.673062	-0.391829	0.871985	0.130332	0.884949	0.572478	1.2424	False	False		Aldh3b1	0.281991	0.00927031	0.0487016	0.571548	0.0759725	0.36513	False	False
ACVR2A_+_148602343.23-P1P2|ACVR2A_-_148602102.23-P1P2	ACVR2A	0.069795	1.15618	0.314713	0.846489	0.992515	0.00326278	-0.0345309	0.000299519	False	False		2310045N01Rik	0.309637	0.509147	-0.194117	0.326787	0.798314	0.0978263	-0.000639246	0.000153358	False	False		Aldh4a1	0.133242	-0.026065	0.0647013	0.203217	-0.0312034	0.0533212	False	False
ACVR2B_+_38495339.23-P1P2|ACVR2B_+_38495606.23-P1P2	ACVR2B	0.29942	0.52372	-0.0300765	0.0366446	0.593699	0.226434	-0.18913	0.113849	False	False		2310047M10Rik	0.528346	0.277082	0.0650498	0.0595952	0.133608	0.874169	0.524152	1.12366	False	False		Aldh5a1	0.117767	0.00339584	0.00745047	0.50206	0.0392273	0.165609	False	False
ACVRL1_-_52300776.23-P1P2|ACVRL1_+_52300726.23-P1P2	ACVRL1	0.430191	0.366338	-0.325958	0.277797	0.942128	0.0258902	-0.00296906	0.000204354	False	False		2310050C09Rik	0.140025	0.853795	0.596599	1.6842	0.18494	0.732969	0.409896	0.73679	False	False		Aldh6a1	0.351114	-0.102149	0.668183	0.215089	0.222429	0.402299	False	False
ACY1_-_52017547.23-P1P2|ACY1_-_52017631.23-P1P2	ACY1	0.0189483	1.72243	0.967551	3.87703	0.150567	0.82227	-0.665885	1.4556	False	False		2310057J18Rik	0.373914	0.427228	0.363126	0.512949	0.20086	0.697106	-0.420556	0.718963	False	False		Aldh7a1	0.418031	-0.0427242	0.332733	0.222602	0.0295808	0.0553702	False	False
ACY3_-_67418149.23-P1|ACY3_+_67418110.23-P1	ACY3	0.136067	0.866249	0.200725	0.404509	0.585215	0.232685	-0.19728	0.122034	False	False		2310057M21Rik	0.155755	0.807559	-0.234371	0.625799	0.678702	0.168321	-0.0201505	0.00831777	False	False		Aldh9a1	0.115224	0.0025935	0.0055673	0.0698473	-0.0406469	0.0238735	False	False
ACY3_+_67414985.23-P2|ACY3_-_67414970.23-P2	ACY3	0.028904	1.53904	0.594561	2.12878	0.977781	0.00975835	-0.046366	0.00120283	False	False		2310057N15Rik	0.149961	0.824023	0.379071	1.0328	0.118561	0.926059	-0.528794	1.20091	False	False		Aldoa	0.749443	-0.128185	1.78973	0.428671	0.100526	0.362361	False	False
ACYP1_-_75530711.23-P1|ACYP1_-_75530695.23-P1	ACYP1	0.908767	0.0415474	-0.138926	0.013428	0.00152266	2.8174	-0.516483	3.86841	False	False		2310061I04Rik	0.0548224	1.26104	-0.676095	2.819	0.881938	0.054562	-0.249975	0.0334481	False	False		Aldob	1.68251	-0.104891	3.28783	0.0147695	-0.0322727	0.00400811	False	False
ACYP1_-_75536179.23-P2|ACYP1_-_75536194.23-P2	ACYP1	0.772908	0.111872	-0.106973	0.0278407	0.841649	0.074869	0.0551608	0.0109789	False	False		2310061N02Rik	0.478755	0.319887	-0.198357	0.209798	0.668072	0.175176	0.285593	0.122689	False	False		Aldoc	0.281991	-0.0231218	0.12147	0.0544907	0.0448482	0.0205497	False	False
ACYP2_-_54342821.23-P1P2|ACYP2_+_54342748.23-P1P2	ACYP2	0.727013	0.138458	-0.286749	0.092364	0.013736	1.86214	0.579867	2.87057	False	False		2310067B10Rik	0.788663	0.103108	0.0616558	0.0210196	0.885386	0.0528674	0.088677	0.0114969	False	False		Alg12	0.129338	-0.020476	0.0493384	1.2214	0.102792	1.05574	False	False
ADA_+_43280285.23-P1P2|ADA_+_43280282.23-P1P2	ADA	0.052477	1.28003	-0.118712	0.353508	0.682945	0.165614	-0.190049	0.0836742	False	False		2310079G19Rik	0.393183	0.405405	-0.400822	0.537276	0.0214201	1.66918	0.699188	2.86207	False	False		Alk	0.635902	-0.0688565	0.815735	0.19735	0.00486493	0.00807331	False	False
ADAD1_-_123300726.23-P1P2|ADAD1_-_123300755.23-P1P2	ADAD1	0.0893349	1.04898	0.260703	0.636204	0.336956	0.472427	-0.829734	1.04208	False	False		2410002F23Rik	0.213618	0.670363	-0.215287	0.477183	0.702851	0.153137	0.181482	0.0681547	False	False		Alkbh2	2.03001	-0.133967	5.06654	0.682667	0.103272	0.592827	False	False
ADAD2_-_84224870.23-P1P2|ADAD2_+_84224814.23-P1P2	ADAD2	0.0654681	1.18397	0.258109	0.710932	0.867289	0.061836	-0.070676	0.0116183	False	False		2410004B18Rik	0.36279	0.440345	0.0897138	0.13062	0.680302	0.167298	-0.249777	0.102477	False	False		Alkbh3	0.908477	0.0678775	1.14882	0.0746617	-0.0396052	0.024865	False	False
ADAL_-_43623140.23-P1P2|ADAL_-_43623106.23-P1P2	ADAL	0.0568665	1.24514	-0.663276	1.92131	0.139815	0.854447	0.381878	0.867438	False	False		2410004P03Rik	0.171884	0.764763	-0.317658	0.803239	0.541817	0.266148	0.458994	0.29958	False	False		Allc	1.39809	0.0810276	2.11048	0.150663	-0.00531527	0.00673394	False	False
ADAM10_+_59041886.23-P1P2|ADAM10_-_59041703.23-P1P2	ADAM10	0.0161379	1.79215	-3.74927	15.6317	0.877976	0.0565174	-0.205845	0.0309279	True	False		2410012M07Rik	0.0556462	1.25456	0.317661	1.31769	0.368995	0.43298	0.136953	0.14542	False	False		Alms1	0.44004	-0.0682998	0.559919	0.766155	0.132424	0.853141	False	False
ADAM11_+_42836787.23-P1P2|ADAM11_-_42836572.23-P1P2	ADAM11	0.404862	0.392693	0.00966564	0.00883013	0.916105	0.0380547	-0.0606373	0.00613446	False	False		2410015M20Rik	0.0135361	1.86851	-0.965514	5.96501	0.104649	0.980267	0.780917	1.8773	False	False		Alox12	0.46815	0.0481036	0.419543	0.44375	-0.125337	0.467688	False	False
ADAM12_-_128077031.23-P1P2|ADAM12_-_128077010.23-P1P2	ADAM12	0.373543	0.42766	-0.0464702	0.0462335	0.603067	0.219634	0.0901779	0.0526536	False	False		2410016O06Rik	0.0347527	1.45901	0.608677	2.93632	0.0841985	1.0747	-0.573921	1.51259	False	False		Alox15	0.861281	-0.0563367	0.903962	1.26305	0.221722	2.35488	False	False
ADAM15_+_155023841.23-P1P2|ADAM15_+_155023860.23-P1P2	ADAM15	0.00127933	2.89302	-3.15049	21.2037	0.617007	0.20971	-0.314726	0.175461	True	False		2410018M08Rik	0.713796	0.146426	-0.145774	0.0705759	0.295831	0.528956	-0.447968	0.5811	False	False		Alox5	0.54841	0.0369943	0.377967	0.747237	-0.144639	0.90883	False	False
ADAM17_-_9695930.23-P1P2|ADAM17_+_9695837.23-P1P2	ADAM17	0.916607	0.0378169	-0.162093	0.0142605	0.500203	0.300853	-0.231566	0.185207	False	False		2410066E13Rik	0.403603	0.394046	-0.250736	0.326679	0.246826	0.607609	0.383842	0.571953	False	False		Alox8	0.493053	-0.0606035	0.556679	1.06701	0.187768	1.68473	False	False
ADAM18_-_39442196.23-P1P2|ADAM18_+_39442286.23-P1P2	ADAM18	0.0430887	1.36564	-2.34064	7.43624	0.638976	0.194515	0.276524	0.142993	False	False		2410076I21Rik	0.181343	0.741499	0.0782737	0.191904	0.952397	0.0211818	0.00780668	0.00040552	False	False		Alpi	0.0459508	0.0125353	0.0107311	0.20913	-0.0497594	0.0875045	False	False
ADAM19_+_157002746.23-P1P2|ADAM19_+_157002739.23-P1P2	ADAM19	0.965571	0.0152158	-0.178634	0.00632331	0.639125	0.194414	-0.0906022	0.0468268	False	False		2410089E03Rik	0.944278	0.0249001	0.0243326	0.0020033	0.868742	0.0611094	0.293599	0.0439994	False	False		Alpk1	0.0712221	-0.0175158	0.0232411	0.275602	0.0427275	0.0990211	False	False
ADAM2_-_39695737.23-P1P2|ADAM2_-_39695635.23-P1P2	ADAM2	0.0390151	1.40877	-1.34616	4.41184	0.511774	0.290921	0.148538	0.114879	False	False		2410124H12Rik	0.359003	0.444903	0.107213	0.157714	0.742662	0.129209	0.217494	0.0689165	False	False		Alpk2	0.183357	-0.0115065	0.0393054	0.185751	0.0331809	0.0518271	False	False
ADAM20_-_71001696.23-P1P2|ADAM20_+_71001702.23-P1P2	ADAM20	0.974608	0.0111701	-0.197119	0.00512235	0.945831	0.0241866	-0.0657837	0.00422982	False	False		2410127L17Rik	0.291804	0.534909	-0.147119	0.2602	0.248546	0.604593	-0.663896	0.984344	False	False		Alpk3	0.0712221	-0.00844514	0.0112056	0.58419	0.0397443	0.195239	False	False
ADAM21_+_70918885.23-P1P2|ADAM21_-_70918928.23-P1P2	ADAM21	0.334492	0.475614	0.0438188	0.0484841	0.688312	0.162215	-0.312479	0.134753	False	False		2410131K14Rik	0.620585	0.207199	-0.211682	0.14502	0.585564	0.232426	-0.38439	0.219099	False	False		Alpl	0.179157	0.0173527	0.057918	0.266005	-0.0661449	0.147953	False	False
ADAM22_+_87563621.23-P1P2|ADAM22_-_87563632.23-P1P2	ADAM22	0.0172011	1.76444	0.462051	1.89663	0.0790798	1.10193	-0.415532	1.21727	False	False		2410137M14Rik	0.770971	0.112962	-0.228777	0.0854479	0.819185	0.0866181	-0.163798	0.0347937	False	False		Alppl2	0.102667	-0.0172106	0.0329185	0.0142451	-0.0809301	0.00969424	False	False
ADAM23_+_207308275.23-P1P2|ADAM23_-_207308295.23-P1P2	ADAM23	0.246877	0.607519	0.132795	0.187683	0.530327	0.275456	0.306362	0.224344	False	False		2410141K09Rik	0.223597	0.650534	-0.315186	0.677945	0.158282	0.800569	0.441677	0.867136	False	False		Als2	0.967152	0.0765177	1.3787	0.466739	-0.206454	0.810283	False	False
ADAM28_+_24151604.23-P1P2|ADAM28_+_24151646.23-P1P2	ADAM28	0.108513	0.964516	-0.0323163	0.0725128	0.700523	0.154578	-0.189178	0.0777403	False	False		2510002D24Rik	0.842362	0.0745013	-0.0125819	0.00309932	0.936173	0.0286438	-0.185603	0.0130377	False	False		Ambp	0.72427	-0.0368911	0.497779	0.164488	-0.0358447	0.049579	False	False
ADAM29_+_175839643.23-P1P2|ADAM29_+_175839773.23-P1P2	ADAM29	0.958624	0.0183515	-0.196443	0.00838673	0.873925	0.058526	-0.156443	0.0243407	False	False		2510003E04Rik	0.844617	0.0733401	0.324127	0.0785985	0.479633	0.319091	-0.311979	0.244132	False	False		Amd1	0.744838	-0.0553823	0.768504	0.382812	-0.0444487	0.143081	False	False
ADAM30_+_120439094.23-P1P2|ADAM30_-_120439090.23-P1P2	ADAM30	0.0844187	1.07356	0.164872	0.411774	0.845418	0.0729287	-0.0836489	0.0162176	False	False		2510009E07Rik	0.91736	0.0374603	-0.0324591	0.00402036	0.900352	0.0455877	-0.0582735	0.00651483	False	False		Amer1	0.87359	0.0686561	1.11738	0.266005	-0.076542	0.171209	False	False
ADAM32_+_38965299.23-P1P2|ADAM32_+_38965287.23-P1P2	ADAM32	0.0586958	1.23139	0.018591	0.0532578	0.307731	0.511828	-0.145653	0.198185	False	False		2510039O18Rik	0.985053	0.00654043	-0.0206259	0.000446042	0.114996	0.939319	-0.154574	0.356067	False	False		Amer2	0.0370601	-0.0160175	0.0110589	1.25706	-0.222992	2.35713	False	False
ADAM33_-_3662638.23-P1P2|ADAM33_+_3662647.23-P1P2	ADAM33	0.487676	0.311869	0.0429537	0.0311642	0.21927	0.659022	-0.505257	0.885197	False	False		2510049J12Rik	0.761071	0.118575	-0.0880446	0.0345185	0.721845	0.141556	0.378694	0.131462	False	False		Amfr	0.102667	-0.00326501	0.00624496	0.538395	0.0542562	0.245634	False	False
ADAM7_-_24298561.23-P1P2|ADAM7_-_24298558.23-P1P2	ADAM7	0.718859	0.143356	-0.0510006	0.0170089	0.128537	0.890972	0.411955	0.975757	False	False		2610002J02Rik	0.916788	0.0377311	-0.124651	0.0155508	0.791575	0.101508	-0.101428	0.0252488	False	False		Amh	1.68589	0.0823082	2.58515	0.112128	0.0176627	0.0166536	False	False
ADAM8_-_135090331.23-P1P2|ADAM8_-_135090322.23-P1P2	ADAM8	0.0137113	1.86292	0.0619343	0.268417	0.296386	0.528142	0.147516	0.207118	False	False		2610002M06Rik	0.88712	0.0520177	0.0847689	0.0145796	0.156998	0.804107	0.682051	1.34498	False	False		Amhr2	0.0359599	0.0153055	0.0102537	0.0153185	0.00138338	0.000178194	False	False
ADAM9_-_38854499.23-P1P2|ADAM9_-_38854561.23-P1P2	ADAM9	0.242052	0.616092	-0.0504113	0.0722533	0.235028	0.62888	0.311286	0.520423	False	False		2610008E11Rik	0.93396	0.0296718	-0.0173589	0.00170303	0.258534	0.587483	0.406554	0.58573	False	False		Amn	0.690551	0.0751191	0.966406	0.342297	0.0804183	0.231471	False	False
ADAMDEC1_+_24242054.23-P1P2|ADAMDEC1_+_24242051.23-P1P2	ADAMDEC1	0.482434	0.316562	-0.01689	0.0124386	0.154265	0.811734	-0.95691	2.06497	False	False		2610015P09Rik	0.726737	0.138623	0.122596	0.0561912	0.991868	0.0035461	-0.759278	0.00660292	False	False		Ampd1	0.412595	-0.0782788	0.601702	0.164488	-0.126218	0.17458	False	False
ADAMTS1_+_28216554.23-P2|ADAMTS1_+_28216594.23-P2	ADAMTS1	0.10879	0.963413	0.235762	0.528408	0.145575	0.836912	-0.46777	1.04074	False	False		2610018G03Rik	0.782016	0.106785	0.152844	0.0539652	0.839046	0.076214	0.145044	0.0271092	False	False		Ampd2	0.491119	0.0407257	0.372623	0.410098	-0.020374	0.0702592	False	False
ADAMTS1_+_28217664.23-P1|ADAMTS1_+_28217658.23-P1	ADAMTS1	0.104591	0.980505	-0.592695	1.35196	0.179181	0.746708	0.345427	0.685701	False	False		2610020H08Rik	0.118249	0.927202	-0.180878	0.55452	0.496993	0.30365	0.107352	0.0799405	False	False		Ampd3	1.01161	-0.0543281	1.02389	0.156159	-0.0862363	0.113239	False	False
ADAMTS10_+_8675562.23-P1P2|ADAMTS10_+_8675559.23-P1P2	ADAMTS10	0.234476	0.629901	0.117203	0.17175	0.737006	0.132529	-0.106775	0.0376192	False	False		2610028H24Rik	0.185137	0.732506	0.462575	1.12034	0.888836	0.0511783	-0.106034	0.013308	False	False		Amt	0.130637	-0.00435775	0.0106057	2.09098	-0.208965	3.6742	False	False
ADAMTS12_-_33892078.23-P1P2|ADAMTS12_+_33892096.23-P1P2	ADAMTS12	0.444862	0.351775	0.0406831	0.0332938	0.770118	0.113443	-0.216351	0.0652476	False	False		2610034B18Rik	0.538321	0.268959	0.310222	0.275878	0.182539	0.738644	-0.508446	0.921008	False	False		Amy1	0.670655	0.0523133	0.653619	0.421205	-0.0755392	0.26755	False	False
ADAMTS13_+_136287556.23-P1P2|ADAMTS13_-_136287562.23-P1P2	ADAMTS13	0.402541	0.39519	0.215855	0.19845	0.853738	0.0686755	-0.0015687	0.000286397	False	False		2610034M16Rik	0.10191	0.991781	-0.446379	1.46378	0.181348	0.741488	0.910514	1.65567	False	False		Anapc1	1.18738	-0.131627	2.91172	0.496103	-0.18791	0.783901	False	False
ADAMTS14_-_72432303.23-P1P2|ADAMTS14_-_72432297.23-P1P2	ADAMTS14	0.396363	0.401907	-0.0248627	0.0232465	0.370103	0.431677	0.312164	0.358237	False	False		2610044O15Rik8	0.991951	0.00350967	-0.0599707	0.000695926	0.0905294	1.04321	0.703923	1.80086	False	False		Anapc10	0.084315	0.0298495	0.0468874	1.15156	0.206742	2.00195	False	False
ADAMTS15_+_130318737.23-P1P2|ADAMTS15_+_130318578.23-P1P2	ADAMTS15	0.727605	0.138104	-0.289503	0.0930129	0.686786	0.163179	0.317389	0.137684	False	False		2610301B20Rik	0.77428	0.111102	0.230693	0.0847449	0.507194	0.294826	0.309473	0.223754	False	False		Anapc11	0.301228	0.0319179	0.17912	0.86892	-0.222973	1.62919	False	False
ADAMTS16_+_5140497.23-P2|ADAMTS16_+_5140486.23-P2	ADAMTS16	0.449656	0.347119	0.339022	0.273773	0.731949	0.135519	0.135887	0.0489563	False	False		2610318N02Rik	0.473403	0.324769	-0.0473883	0.0508866	0.79382	0.100278	-0.0831217	0.0204411	False	False		Anapc13	0.25236	-0.0558283	0.262475	0.0758719	-0.0272302	0.0173728	False	False
ADAMTS16_+_5146341.23-P1|ADAMTS16_+_5146377.23-P1	ADAMTS16	0.182455	0.738844	0.179387	0.308338	0.180608	0.743263	0.613722	1.21267	False	False		2610507B11Rik	0.0249375	1.60315	0.532889	2.82467	0.0944794	1.02466	-0.651651	1.63749	False	False		Anapc2	0.311	0.0312206	0.18089	0.775692	-0.197171	1.28608	False	False
ADAMTS17_+_100882122.23-P1P2|ADAMTS17_-_100882166.23-P1P2	ADAMTS17	0.0365037	1.43766	-0.786689	2.63114	0.480919	0.317928	0.0205769	0.0173915	False	False		2610524H06Rik	0.136006	0.866441	0.302123	0.865528	0.18111	0.742058	-0.357009	0.649681	False	False		Anapc4	1.03553	-0.136845	2.63999	0.149295	0.0554937	0.0696672	False	False
ADAMTS18_+_77468890.23-P1P2|ADAMTS18_-_77468873.23-P1P2	ADAMTS18	0.58152	0.235435	-0.0838646	0.0459339	0.0200323	1.69827	-0.591726	2.6715	False	False		2610528A11Rik	0.32782	0.484365	0.123119	0.197177	0.201887	0.694891	-0.142679	0.243141	False	False		Anapc5	3.38578	-0.605787	38.2114	0.28701	0.233209	0.562834	True	False
ADAMTS19_+_128796021.23-P1P2|ADAMTS19_+_128796013.23-P1P2	ADAMTS19	0.201871	0.694926	0.0620957	0.100388	0.283261	0.547813	0.0694795	0.101185	False	False		2610528J11Rik	0.0763005	1.11747	-0.690094	2.54978	0.662782	0.178629	-0.452172	0.198079	False	False		Anapc7	2.69381	-0.141321	7.0923	1.36079	0.202156	2.31321	True	False
ADAMTS2_-_178772408.23-P1P2|ADAMTS2_-_178772444.23-P1P2	ADAMTS2	0.877208	0.0568974	-0.128318	0.016985	0.763438	0.117226	0.0645389	0.0201129	False	False		2700029M09Rik	0.912215	0.0399028	0.0377311	0.00497805	0.0784776	1.10525	-0.595699	1.61463	False	False		Ang	0.812839	-0.0659239	0.9983	1.15443	0.209674	2.0354	False	False
ADAMTS20_+_43945953.23-P1P2|ADAMTS20_+_43945912.23-P1P2	ADAMTS20	0.0923069	1.03477	0.394625	0.949972	0.843308	0.0740136	-0.145259	0.0285813	False	False		2700049A03Rik	0.72836	0.137654	0.220599	0.100404	0.00390405	2.40848	-1.08638	6.41666	False	False		Angel1	0.793816	0.0787591	1.16475	0.32179	0.0549622	0.148722	False	False
ADAMTS3_-_73434891.23-P1P2|ADAMTS3_-_73434871.23-P1P2	ADAMTS3	0.051702	1.28649	-0.0602933	0.180451	0.452911	0.343987	0.18035	0.164925	False	False		2700050L05Rik	0.617029	0.209695	-0.444334	0.308073	0.933857	0.0297194	0.0190513	0.00138851	False	False		Angpt1	0.320874	0.0119139	0.0712198	0.0795184	0.0178806	0.011956	False	False
ADAMTS4_+_161168828.23-P1P2|ADAMTS4_-_161168836.23-P1P2	ADAMTS4	0.938455	0.0275865	-0.162554	0.0104322	0.952389	0.0211856	-0.0574312	0.00323457	False	False		2700060E02Rik	0.0127916	1.89308	-0.638502	3.99657	0.416949	0.379917	0.23817	0.221901	False	False		Angpt2	0.0723996	0.0376984	0.0508479	0.730856	-0.167263	1.02794	False	False
ADAMTS5_-_28339372.23-P1P2|ADAMTS5_-_28339421.23-P1P2	ADAMTS5	0.138753	0.857759	0.47456	0.946979	0.0673532	1.17164	-0.335877	1.04617	False	False		2700062C07Rik	0.000453283	3.34363	-2.67725	29.5982	0.00461613	2.33572	2.03856	11.6769	True	True		Angptl1	0.1626	0.0286713	0.086852	0.0395741	-0.00180066	0.000599215	False	False
ADAMTS6_+_64777661.23-P1P2|ADAMTS6_-_64777602.23-P1P2	ADAMTS6	0.0145609	1.83681	0.321879	1.37543	0.267936	0.571968	-0.171879	0.261351	False	False		2700081O15Rik	0.164325	0.784297	0.407361	1.05637	0.266283	0.574657	-0.416604	0.587106	False	False		Ankk1	0.453075	-0.0588206	0.496493	0.256513	0.0550436	0.118728	False	False
ADAMTS7_-_79103729.23-P1P2|ADAMTS7_+_79103613.23-P1P2	ADAMTS7	0.826276	0.0828747	-0.11848	0.0228429	0.176761	0.752615	0.19616	0.392475	False	False		2700089E24Rik	0.0447765	1.34895	-0.584331	2.60623	0.659616	0.180709	-0.156725	0.0694547	False	False		Anln	1.97837	-0.216205	7.96869	0.945898	0.194431	1.5465	True	False
ADAMTS8_-_130298510.23-P1P2|ADAMTS8_+_130298490.23-P1P2	ADAMTS8	0.306779	0.513174	0.183106	0.218601	0.525656	0.279299	-0.372483	0.276569	False	False		2700094K13Rik	0.608594	0.215672	-0.129098	0.0920604	0.347683	0.458817	-0.309355	0.348081	False	False		Ano3	0.56058	0.0266165	0.277973	0.171506	0.046469	0.0670163	False	False
ADAMTS9_+_64673035.23-P1P2|ADAMTS9_-_64673170.23-P1P2	ADAMTS9	0.612464	0.212919	-0.264231	0.130883	0.0163118	1.7875	-0.877758	4.17108	False	False		2700097O09Rik	0.6561	0.18303	-0.131175	0.0793837	0.834497	0.0785752	-0.0604202	0.0116426	False	False		Anp32b	0.640203	0.0601268	0.717132	0.143854	-0.0584993	0.0707637	False	False
ADAMTSL1_+_18474201.23-P1P2|ADAMTSL1_-_18474157.23-P1P2	ADAMTSL1	0.85737	0.0668316	-0.260598	0.0405169	0.738304	0.131765	0.0203985	0.00714536	False	False		2810004N23Rik	0.0318303	1.49716	-1.37777	6.82031	0.116344	0.934257	0.929972	2.13069	False	False		Anpep	0.133242	0.017904	0.0444432	0.809486	0.192674	1.31151	False	False
ADAMTSL2_-_136399861.23-P1P2|ADAMTSL2_+_136399841.23-P1P2	ADAMTSL2	0.379631	0.420639	-0.367089	0.359223	0.0762565	1.11772	0.386577	1.14868	False	False		2810006K23Rik	0.820443	0.0859515	-0.062021	0.0176258	0.809014	0.0920437	-0.0458488	0.0103492	False	False		Anxa1	1.04088	-0.142243	2.75831	0.612817	0.187951	0.968532	False	False
ADAMTSL3_-_84323067.23-P1P2|ADAMTSL3_-_84322944.23-P1P2	ADAMTSL3	0.0840076	1.07568	-0.985363	2.46583	0.0277158	1.55727	0.741589	3.07012	False	False		2810007J24Rik	0.947146	0.023583	0.130852	0.0102033	0.762559	0.117727	0.0200836	0.00579829	False	False		Anxa2	0.247774	-0.00742892	0.0342922	0.52617	0.136303	0.603073	False	False
ADAMTSL4_-_150521934.23-P1P2|ADAMTSL4_+_150521916.23-P1P2	ADAMTSL4	0.353843	0.451189	-0.0461294	0.0484195	0.836377	0.0775978	-0.106454	0.0219603	False	False		2810021J22Rik	0.288518	0.539827	-0.443115	0.790913	0.20163	0.695445	0.155098	0.264517	False	False		Anxa3	1.2103	0.116175	2.6195	0.510047	-0.1323	0.567425	False	False
ADAMTSL5_-_1512947.23-P1P2|ADAMTSL5_-_1512963.23-P1P2	ADAMTSL5	0.617866	0.209106	-0.0461754	0.0224626	0.89157	0.0498444	-0.0844456	0.0111898	False	False		2810403A07Rik	0.650902	0.186484	0.218666	0.134828	0.20163	0.695445	0.277737	0.473675	False	False		Anxa4	1.63552	-0.0973769	2.96706	0.228663	0.0215179	0.0413748	False	False
ADAP1_+_994282.23-P1P2|ADAP1_+_994276.23-P1P2	ADAP1	0.000430954	3.36557	0.232119	1.81741	0.674674	0.170906	-0.0708215	0.0321774	False	False		2810408A11Rik	0.313081	0.504343	-0.10091	0.168275	0.668602	0.174832	0.157491	0.0675244	False	False		Anxa5	0.956826	0.0682006	1.21572	0.1425	0.0233877	0.0280247	False	False
ADAP2_-_29249001.23-P1P2|ADAP2_+_29249009.23-P1P2	ADAP2	0.0188786	1.72403	-2.32032	9.30629	0.847911	0.0716496	-0.0880903	0.0167792	False	False		2810408M09Rik	0.322505	0.491463	0.217979	0.354212	0.79382	0.100278	-0.0558234	0.013728	False	False		Anxa8	1.66229	-0.0985146	3.05085	0.917325	-0.133454	1.02942	False	False
ADAR_-_154580658.23-P1|ADAR_-_154580605.23-P1	ADAR	0.0245966	1.60913	-4.09094	15.3143	0.0538905	1.26849	1.60274	5.40477	True	False		2810417H13Rik	0.48324	0.315837	-0.217286	0.22691	0.833361	0.079167	0.136589	0.0265183	False	False		Aoc2	0.103911	-0.000590358	0.00114286	0.51607	0.11379	0.4938	False	False
ADAR_-_154599983.23-P2|ADAR_+_154600408.23-P2	ADAR	0.267697	0.572356	-0.0043401	0.00577896	0.0967603	1.0143	-0.737045	1.98742	False	False		2810428I15Rik	0.527434	0.277832	-0.535388	0.491822	0.116513	0.933625	-0.551045	1.26166	False	False		Aoc3	0.690551	0.0488251	0.628135	0.851388	-0.138928	0.994617	False	False
ADARB1_-_46494561.23-P1P2|ADARB1_+_46494897.23-P1P2	ADARB1	0.523086	0.281427	-0.116762	0.0764451	0.968867	0.013736	-0.0246693	0.000900837	False	False		2810459M11Rik	0.487296	0.312207	0.194599	0.200882	0.176406	0.753488	-0.681324	1.25896	False	False		Apaf1	1.49532	-0.0927359	2.58343	0.0686503	-0.0200117	0.0115522	False	False
ADARB2_+_1779687.23-ENST00000381312.1|ADARB2_-_1779460.23-ENST00000381312.1	ADARB2	0.183801	0.735651	-0.788191	1.34892	0.315976	0.500346	0.524705	0.697934	False	False		2810474O19Rik	0.116226	0.934695	0.438538	1.3553	0.632437	0.198983	-0.403879	0.197083	False	False		Apbb1	0.150434	-0.00537997	0.0150779	0.500072	-0.0860913	0.362018	False	False
ADAT1_+_75657125.23-P1P2|ADAT1_+_75656919.23-P1P2	ADAT1	0.391258	0.407537	-0.429933	0.407616	0.218487	0.660575	-0.533089	0.936159	False	False		2900011O08Rik	0.753398	0.122976	0.0947755	0.0385365	0.296841	0.527476	0.564424	0.730115	False	False		Apbb1ip	0.0807137	-0.0349585	0.0525671	0.0142451	-0.0676764	0.00810663	False	False
ADAT2_-_143771826.23-P1P2|ADAT2_+_143771740.23-P1P2	ADAT2	0.00485858	2.31349	-3.35789	18.0725	0.755614	0.1217	-0.290632	0.0940289	True	False		2900026A02Rik	0.0158783	1.79919	-0.564936	3.36074	0.168618	0.773096	0.474202	0.899044	False	False		Apbb2	0.246251	0.011033	0.0506155	0.770917	0.108505	0.703388	False	False
ADAT3_-_1905438.23-P1|ADAT3_+_1905424.23-P1	ADAT3	0.193085	0.714251	-5.42412	9.01288	0.892151	0.0495614	0.672685	0.0886306	False	False		2900092C05Rik	0.21655	0.664441	-0.436055	0.957978	0.310877	0.507411	0.447192	0.556465	False	False		Apc	0.317571	-0.0230174	0.13618	0.873958	0.169055	1.24239	False	False
ADAT3_+_1907955.23-P2|ADAT3_+_1908004.23-P2	ADAT3	0.0571238	1.24318	-0.467167	1.35111	0.521346	0.282874	-0.280742	0.21112	False	False		3010026O09Rik	0.0146953	1.83282	0.684206	4.14633	0.577579	0.238388	-0.359565	0.210206	False	False		Apc2	0.1626	-0.0591262	0.179107	0.121219	-0.0845851	0.0862188	False	False
ADC_-_33546826.23-P1P2|ADC_-_33546829.23-P1P2	ADC	0.295437	0.529535	-0.0149621	0.0184319	0.400085	0.397848	-0.287903	0.304503	False	False		3110001I22Rik	0.970111	0.0131785	-0.0670057	0.00291968	0.70826	0.149808	-0.140056	0.0514541	False	False		Apcs	0.522415	-0.0500014	0.486644	0.0163943	0.0418446	0.00576861	False	False
ADCK1_-_78266523.23-P1P2|ADCK1_-_78266512.23-P1P2	ADCK1	0.170709	0.767744	-0.499237	0.891675	0.310403	0.508074	0.284286	0.383982	False	False		3110002H16Rik	0.0894417	1.04846	0.552018	1.91365	0.264409	0.577725	-0.381856	0.541008	False	False		Apex1	0.927424	-0.0614369	1.0615	0.22206	0.0563544	0.105229	False	False
ADCK2_+_140372748.23-P1P2|ADCK2_+_140372768.23-P1P2	ADCK2	0.224751	0.648299	0.132169	0.199337	0.52543	0.279486	0.0421914	0.0313481	False	False		3110007F17Rik	0.549318	0.260176	0.256684	0.220813	0.184699	0.733536	-0.413209	0.743317	False	False		Apex2	0.250829	-0.0287482	0.134339	0.504052	-0.0563231	0.238727	False	False
ADCK3_-_227128046.23-P1P2|ADCK3_-_227128055.23-P1P2	ADCK3	0.270393	0.568005	-0.237904	0.314367	0.325108	0.487973	0.0800425	0.103835	False	False		3110009E18Rik	0.445423	0.351228	-0.266703	0.309723	0.831657	0.080056	-0.00750446	0.00147332	False	False		Api5	1.46992	-0.122057	3.3425	0.763779	0.121097	0.777746	False	False
ADCK4_+_41222752.23-P1P2|ADCK4_-_41222769.23-P1P2	ADCK4	0.546509	0.262403	-0.0209031	0.0127604	0.876497	0.0572498	0.000736946	0.00011216	False	False		3110021N24Rik	0.346681	0.460069	0.223765	0.340387	0.440301	0.356251	0.121506	0.106154	False	False		Aplf	0.104316	0.0523617	0.10176	0.669453	0.215982	1.21584	False	False
ADCK5_+_145597793.23-P1P2|ADCK5_-_145597781.23-P1P2	ADCK5	0.0322396	1.49161	-3.41503	11.8504	0.714107	0.146237	-0.463061	0.18002	True	False		3110035E14Rik	0.123778	0.907356	-0.680753	2.04232	0.0357029	1.4473	0.893626	3.17174	False	False		Apobec4	1.15904	-0.0695125	1.50098	0.0384448	-0.0583708	0.01887	False	False
ADCY1_+_45614267.23-P1P2|ADCY1_-_45614293.23-P1P2	ADCY1	0.386289	0.413088	0.0269812	0.0259291	0.152531	0.816642	0.80248	1.74219	False	False		3110040N11Rik	0.826612	0.0826983	-0.0230186	0.00629409	0.744314	0.128244	-0.132604	0.041704	False	False		Apod	0.544378	-0.0480612	0.487426	0.256513	-0.038153	0.0822955	False	False
ADCY10_+_167883329.23-P1P2|ADCY10_-_167882911.23-P1P2	ADCY10	0.202297	0.694011	0.127159	0.205305	0.362973	0.440125	-0.322797	0.377689	False	False		3110043O21Rik	0.246597	0.608012	-0.270072	0.542937	0.558335	0.253105	-0.247215	0.153447	False	False		Apoe	0.161237	-0.0200362	0.0601858	0.0418405	-0.0846644	0.0297877	False	False
ADCY2_-_7396414.23-P1P2|ADCY2_-_7396463.23-P1P2	ADCY2	0.00148738	2.82758	-3.68964	24.2707	0.106056	0.974466	-1.74659	4.52467	True	False		3110047P20Rik	0.438578	0.357954	-0.218707	0.258849	0.484624	0.314595	0.293249	0.226242	False	False		Apoh	0.961983	-0.058271	1.04432	0.46095	-0.151814	0.588441	False	False
ADCY3_-_25143044.23-P1P2|ADCY3_-_25142849.23-P1P2	ADCY3	0.399496	0.398487	-0.0288831	0.0267757	0.405738	0.391754	-0.00234976	0.00244717	False	False		3110052M02Rik	0.767117	0.115139	-0.0269086	0.010244	0.02796	1.55346	-0.916875	3.49297	False	False		App	0.489189	-0.0572978	0.522189	0.191527	-0.018859	0.030373	False	False
ADCY4_-_24804227.23-P1P2|ADCY4_-_24804233.23-P1P2	ADCY4	0.145939	0.83583	0.296337	0.576219	0.361522	0.441865	-0.360016	0.422902	False	False		3110057O12Rik	0.964367	0.0157578	0.207901	0.010832	0.35557	0.449074	-0.245668	0.270551	False	False		Appl1	0.868657	0.0980883	1.58737	0.286932	-0.0548598	0.132364	False	False
ADCY5_+_123168382.23-P1P2|ADCY5_-_123168354.23-P1P2	ADCY5	0.0942903	1.02553	-0.755008	1.80129	0.585695	0.232328	-0.150425	0.0929076	False	False		3110062M04Rik	0.888828	0.0511824	-0.0604224	0.0102253	0.221311	0.654996	-0.933103	1.49883	False	False		Appl2	1.28029	-0.0936236	2.2331	0.338849	0.085349	0.243189	False	False
ADCY6_+_49182840.23-P1P2|ADCY6_+_49182614.23-P1P2	ADCY6	0.907929	0.041948	-0.155748	0.0151991	0.804537	0.0944542	-0.142844	0.0358685	False	False		3110079O15Rik	0.713258	0.146753	-0.116747	0.0566489	0.630884	0.200051	-0.32747	0.160655	False	False		Aprt	0.301228	-0.029452	0.165282	0.328578	0.0515078	0.142315	False	False
ADCY7_-_50300524.23-P1P2|ADCY7_-_50300498.23-P1P2	ADCY7	0.694178	0.158529	-0.077531	0.0285935	0.291858	0.534829	-0.486747	0.692064	False	False		3110082I17Rik	0.818763	0.086842	0.237588	0.0682199	0.435143	0.361368	-0.0761232	0.0674607	False	False		Aptx	0.0229482	-0.0399243	0.0170686	0.611973	0.203066	1.04498	False	False
ADCY8_-_132053083.23-P1P2|ADCY8_-_132053093.23-P1P2	ADCY8	0.0826211	1.08291	-0.662127	1.66808	0.372094	0.429347	0.100791	0.115043	False	False		3110082J24Rik	0.263438	0.579322	0.108654	0.208125	0.241162	0.617692	-0.555911	0.842094	False	False		Aqp1	0.277245	0.00330644	0.0170781	0.0943438	0.112509	0.0892561	False	False
ADCY9_-_4166392.23-P1P2|ADCY9_+_4166432.23-P1P2	ADCY9	0.357051	0.44727	0.419152	0.436139	0.160207	0.795318	0.529199	1.11889	False	False		3300002I08Rik	0.91736	0.0374603	-0.041393	0.00512691	0.972705	0.012019	-0.177033	0.00521802	False	False		Aqr	0.980132	-0.0845691	1.54422	0.040706	-0.0127095	0.00435035	False	False
ADCYAP1_-_904591.23-P1P2|ADCYAP1_-_904647.23-P1P2	ADCYAP1	0.0853844	1.06862	-0.918104	2.28244	0.450518	0.346288	-0.212669	0.195781	False	False		3425401B19Rik	0.803677	0.0949187	0.0400015	0.0125541	0.1702	0.769041	-0.65783	1.24064	False	False		Ar	1.316	-0.0914846	2.24294	0.174332	0.0963171	0.141195	False	False
ADCYAP1R1_-_31091992.23-P1P2|ADCYAP1R1_-_31092299.23-P1P2	ADCYAP1R1	0.710912	0.148184	-0.0711166	0.0245164	0.0737887	1.13201	0.187284	0.56361	False	False		3632451O06Rik	0.0290149	1.53738	0.427617	2.17367	0.919975	0.0362238	0.0705515	0.00626734	False	False		Araf	0.60614	0.0494864	0.55882	2.12189	-0.264163	4.71337	False	False
ADD1_-_2845605.23-P1P2|ADD1_-_2845599.23-P1P2	ADD1	0.551745	0.258262	0.0437874	0.0263083	0.172851	0.762328	0.43847	0.888608	False	False		3830403N18Rik	0.457983	0.339151	-0.3586	0.402125	0.887686	0.0517407	-0.0275819	0.00349978	False	False		Arap1	0.169451	0.0320461	0.101166	0.488204	0.0601963	0.247121	False	False
ADD2_+_70995263.23-P1P2|ADD2_+_70995300.23-P1P2	ADD2	0.187085	0.727961	0.0513981	0.087044	0.564365	0.24844	-0.22271	0.147092	False	False		3830406C13Rik	0.103734	0.984079	0.612299	1.99228	0.906695	0.042539	-0.247471	0.0258163	False	False		Arf2	0.466255	0.0270343	0.23483	0.19589	-0.0986422	0.162485	False	False
ADD3_-_111767767.23-P1P2|ADD3_-_111767783.23-P1P2	ADD3	0.743992	0.128432	-0.316868	0.0946748	0.785427	0.104894	-0.11543	0.0321882	False	False		3830417A13Rik	0.682337	0.166001	-0.410903	0.225531	0.391924	0.406799	0.153292	0.152927	False	False		Arf4	0.261608	-0.0459466	0.223933	1.07256	-0.167996	1.51515	False	False
ADGB_+_146920153.23-P1P2|ADGB_-_146920345.23-P1P2	ADGB	0.297615	0.526346	0.239789	0.293618	0.939049	0.0273117	-0.0584351	0.00424279	False	False		4430402I18Rik	0.114893	0.939706	-0.762634	2.36955	0.741011	0.130175	-0.227215	0.0725353	False	False		Arf6	1.43535	-0.108242	2.89444	0.204691	0.0234207	0.0403123	False	False
ADH1A_+_100212094.23-P1P2|ADH1A_-_100212162.23-P1P2	ADH1A	0.636559	0.196161	-0.212582	0.0970115	0.194918	0.710149	0.225508	0.425736	False	False		4632428N05Rik	0.0955576	1.01973	0.297662	1.00362	0.155064	0.809489	-0.415233	0.824303	False	False		Arg1	0.432657	0.0183366	0.147801	1.28413	0.165339	1.78535	False	False
ADH1B_+_100242511.23-P1P2|ADH1B_-_100242333.23-P1P2	ADH1B	0.677446	0.169125	-0.218738	0.0860628	0.272502	0.56463	0.275613	0.413706	False	False		4632434I11Rik	0.0797065	1.09851	0.261995	0.951597	0.703932	0.15247	-0.274299	0.102563	False	False		Arg2	0.12032	0.00480936	0.0107805	0.843924	0.140133	0.994451	False	False
ADH1C_-_100273879.23-P1P2|ADH1C_-_100273923.23-P1P2	ADH1C	0.15424	0.811804	0.239388	0.452102	0.458025	0.339111	0.138378	0.124749	False	False		4732456N10Rik	0.894524	0.0484081	-0.12925	0.0206875	0.49884	0.302039	0.263299	0.195028	False	False		Arglu1	0.447471	0.0229924	0.191674	0.838965	-0.128676	0.907775	False	False
ADH4_+_100065429.23-P1P2|ADH4_+_100065433.23-P1P2	ADH4	0.872307	0.0593308	-0.172093	0.0237534	0.393909	0.404604	0.172415	0.185452	False	False		4833403I15Rik	0.711647	0.147735	-0.202835	0.0990798	0.797752	0.0981322	0.302587	0.0728191	False	False		Arhgap11a	0.690551	0.035237	0.453324	1.04498	-0.174145	1.53024	False	False
ADH5_+_100009821.23-P1P2|ADH5_+_100009684.23-P1P2	ADH5	0.197001	0.705532	0.0185827	0.0305006	0.518583	0.285182	-0.292871	0.222037	False	False		4833420G17Rik	0.418824	0.377969	-0.275909	0.344809	0.362435	0.440769	-0.00198654	0.0021473	False	False		Arhgap20	0.278824	-0.058049	0.301536	0.486237	-0.162572	0.664711	False	False
ADH6_-_100140386.23-P1P2|ADH6_+_100140286.23-P1P2	ADH6	0.978804	0.00930411	-0.17221	0.00372749	0.0775007	1.11069	0.543528	1.60489	False	False		4833423E24Rik	0.558486	0.252987	-0.202671	0.169531	0.0393047	1.40556	0.511766	1.76402	False	False		Arhgap25	0.491119	0.0456159	0.417366	0.462877	-0.0599878	0.233489	False	False
ADH7_+_100356481.23-P1P2|ADH7_+_100356385.23-P1P2	ADH7	0.267346	0.572927	0.0859638	0.114577	0.531309	0.274653	-0.348231	0.254261	False	False		4833424O15Rik	0.173018	0.761909	-1.26518	3.18722	0.986684	0.0058218	0.0663819	0.000947742	False	False		Arhgap26	0.113957	-0.00586934	0.0124607	0.256513	-0.0549223	0.118467	False	False
ADHFE1_-_67344732.23-P1P2|ADHFE1_-_67344792.23-P1P2	ADHFE1	0.563883	0.248811	-0.138944	0.0804251	0.116792	0.932587	-0.554071	1.37367	False	False		4833427G06Rik	0.636952	0.195893	-0.219818	0.142377	0.0852501	1.06931	-0.568826	1.49164	False	False		Arhgap29	0.502765	-0.0431419	0.40409	1.01505	0.170806	1.4579	False	False
ADI1_+_3523275.23-P1P2|ADI1_-_3523293.23-P1P2	ADI1	0.0972411	1.01215	-0.0616647	0.1452	0.0115565	1.93717	0.825976	4.25368	False	False		4833439L19Rik	0.243963	0.612676	0.154013	0.311993	0.455543	0.34147	0.327646	0.274373	False	False		Arhgef12	0.332524	-0.120458	0.746226	0.0142451	-0.0444932	0.00532963	False	False
ADIG_+_37209911.23-P1P2|ADIG_+_37209902.23-P1P2	ADIG	0.926447	0.0331794	-0.151904	0.0117252	0.760039	0.119164	0.148641	0.0470881	False	False		4921501E09Rik	0.72836	0.137654	0.0384058	0.0174801	0.658562	0.181403	-0.0819217	0.0364441	False	False		Arhgef25	0.491119	0.0291354	0.266576	0.105716	0.0544257	0.0483818	False	False
ADIPOQ_+_186560526.23-P1P2|ADIPOQ_+_186560448.23-P1P2	ADIPOQ	0.305335	0.515224	0.402544	0.482495	0.880504	0.0552686	-0.204491	0.0300456	False	False		4921504E06Rik	0.680224	0.167348	0.137061	0.0758393	0.490101	0.309715	-0.453953	0.344792	False	False		Arhgef40	0.264713	-0.0360712	0.177889	0.275602	0.0288608	0.0668849	False	False
ADIPOR1_+_202927394.23-P1P2|ADIPOR1_-_202927375.23-P1P2	ADIPOR1	0.268059	0.57177	0.215405	0.286524	0.390675	0.408184	-0.451868	0.490339	False	False		4921507P07Rik	0.659749	0.180621	-0.476867	0.284789	0.197295	0.704884	0.793458	1.37159	False	False		Arhgef6	1.057	-0.106716	2.10145	0.618461	-0.224287	1.16642	False	False
ADIPOR2_-_1800242.23-P1P2|ADIPOR2_-_1800278.23-P1P2	ADIPOR2	0.958487	0.0184136	-0.181543	0.00777681	0.203732	0.690942	0.212718	0.390727	False	False		4921509C19Rik	0.696669	0.156973	-0.0883111	0.0458352	0.973866	0.0115009	-0.0023641	6.66776e-05	False	False		Arhgef7	0.247774	0.0140257	0.0647431	0.133103	-0.0684834	0.07665	False	False
ADIRF_-_88728314.23-P1P2|ADIRF_-_88728245.23-P1P2	ADIRF	0.223414	0.650889	0.110952	0.168007	0.182375	0.739034	-0.521736	1.02505	False	False		4921511H03Rik	0.905932	0.0429044	-0.0509789	0.00723186	0.26597	0.575168	0.220503	0.311023	False	False		Arid1a	1.77847	-0.134065	4.44196	1.48794	0.219555	2.74705	False	False
ADK_-_75911025.23-P2|ADK_-_75911021.23-P2	ADK	0.407463	0.389912	-0.513384	0.465685	0.28489	0.545323	0.865486	1.25471	False	False		4921517D22Rik	0.854216	0.0684323	0.204818	0.0463432	0.0985664	1.00627	-0.56707	1.39938	False	False		Arl1	0.0630496	-0.0101609	0.0119352	0.74254	0.159684	0.997058	False	False
ADK_-_75936578.23-P1|ADK_+_75936517.23-P1	ADK	0.678842	0.168232	-0.131791	0.0515793	0.347449	0.459109	0.179734	0.219369	False	False		4921524J17Rik	0.509235	0.293082	-0.16493	0.159826	0.972705	0.012019	0.0854421	0.00251839	False	False		Arl2bp	0.500817	0.0315875	0.294719	0.357961	-0.0772195	0.232435	False	False
ADM_+_10327266.23-P1P2|ADM_+_10326660.23-P1P2	ADM	0.13858	0.858301	0.19331	0.385991	0.56381	0.248867	0.0783604	0.0518433	False	False		4921524L21Rik	0.937971	0.0278105	-0.158409	0.0145662	0.436858	0.359659	-0.170123	0.150051	False	False		Arl3	0.0642095	-0.035133	0.0420271	0.470614	0.0728162	0.288158	False	False
ADM2_-_50920028.23-P1P2|ADM2_+_50920011.23-P1P2	ADM2	0.0818758	1.08684	0.0827422	0.209208	0.44739	0.349313	-0.277039	0.257267	False	False		4921530D09Rik	0.525553	0.279384	0.0845612	0.0781142	0.22742	0.643172	-0.397849	0.627523	False	False		Arl5a	0.642358	-0.0558098	0.667885	0.55487	-0.0853976	0.398452	False	False
ADM5_+_50191862.23-P1P2|ADM5_+_50191867.23-P1P2	ADM5	0.426349	0.370235	0.0250791	0.0216009	0.72748	0.138179	-0.068975	0.0253374	False	False		4921530L21Rik	0.862137	0.0644235	-0.107237	0.0228427	0.997677	0.00101024	0.0797864	0.000197668	False	False		Arl5b	0.0759476	-0.00880827	0.0124629	0.0142451	-0.0157518	0.00188683	False	False
ADNP_+_49547361.23-P1P2|ADNP_-_49547707.23-P1P2	ADNP	0.0219494	1.65858	-3.29458	12.7122	0.464613	0.332908	-0.435797	0.385689	True	False		4921536K21Rik	0.495007	0.305388	0.239006	0.241334	0.0749614	1.12516	-0.717797	1.98062	False	False		Arl9	0.01552	0.00130758	0.000378071	0.310025	-0.0732021	0.190836	False	False
ADNP2_-_77867648.23-P1P2|ADNP2_-_77867365.23-P1P2	ADNP2	0.0658429	1.18149	-2.03626	5.59688	0.848445	0.0713762	-0.117597	0.022314	False	False		4921539E11Rik	0.017279	1.76248	0.610352	3.55682	0.394748	0.40368	-0.454885	0.450321	False	False		Armc6	0.190411	-0.0206154	0.0731302	0.285305	0.0090828	0.0217905	False	False
ADO_-_64564781.23-P1P2|ADO_-_64564623.23-P1P2	ADO	0.0243991	1.61263	-3.69334	13.856	0.623877	0.204901	0.314125	0.17111	True	False		4922501C03Rik	0.653499	0.184755	-0.0752596	0.0459743	0.585063	0.232797	0.419238	0.239344	False	False		Arnt	1.95644	-0.157913	5.7557	1.892	-0.24478	3.89436	False	False
ADORA1_+_203097472.23-P1P2|ADORA1_+_203097450.23-P1P2	ADORA1	0.846732	0.0722538	-0.148293	0.0249267	0.30551	0.514974	0.344773	0.472005	False	False		4922501L14Rik	0.924797	0.0339535	0.0728081	0.00817376	0.030717	1.51262	-0.844355	3.13212	False	False		Arnt2	0.0747624	0.0295031	0.0410928	0.222602	0.184134	0.344668	False	False
ADORA2A_-_24819888.23-P1P2|ADORA2A_-_24819903.23-P1P2	ADORA2A	0.00519358	2.28453	-1.99156	10.5846	0.698331	0.155939	0.14767	0.0612174	True	False		4922502D21Rik	0.019906	1.70102	0.452235	2.54349	0.823148	0.0845219	0.0494402	0.0102479	False	False		Arpc1a	0.27263	0.0109138	0.0554326	0.158918	-0.08064	0.107761	False	False
ADORA2B_-_15848791.23-P1P2|ADORA2B_+_15848650.23-P1P2	ADORA2B	0.299089	0.5242	0.00161908	0.00197446	0.465157	0.3324	-0.388852	0.343617	False	False		4922505E12Rik	0.150778	0.821661	-0.549571	1.49305	0.446797	0.34989	-0.575288	0.493628	False	False		Arpc1b	1.07869	-0.0679454	1.36543	0.198812	-0.0745687	0.124663	False	False
ADORA3_-_112046251.23-P2|ADORA3_+_112046115.23-P2	ADORA3	0.37986	0.420377	0.362517	0.354528	0.621259	0.206727	-0.304369	0.167273	False	False		4930402F06Rik	0.690286	0.160971	0.0237851	0.0126593	0.789332	0.10274	-0.257484	0.0648746	False	False		Arpc2	0.380531	-0.0322797	0.228841	0.300057	-0.0415854	0.104926	False	False
ADORA3_+_112031411.23-P1|ADORA3_+_112031386.23-P1	ADORA3	0.529829	0.275865	0.0823376	0.0528418	0.288121	0.540425	-0.526852	0.756923	False	False		4930402H24Rik	0.264362	0.577801	-0.153361	0.292989	0.307069	0.512764	0.343839	0.432371	False	False		Arpc3	1.26849	-0.0983791	2.3249	0.428671	0.0796163	0.286988	False	False
ADPGK_+_73076082.23-P1P2|ADPGK_+_73076066.23-P1P2	ADPGK	0.104632	0.980336	-7.24115	16.5145	0.555599	0.255238	2.11256	1.43345	True	False		4930402K13Rik	0.221684	0.654266	-0.302722	0.654872	0.253354	0.596272	0.323971	0.473733	False	False		Arpc4	2.06731	-0.195395	7.52545	0.0807392	0.00287101	0.00194921	True	False
ADPRH_+_119298604.23-P1P2|ADPRH_+_119298812.23-P1P2	ADPRH	0.395974	0.402333	0.0754895	0.0706572	0.740082	0.13072	0.140858	0.0489499	False	False		4930404A10Rik	0.875181	0.0579022	-0.0415253	0.00794996	0.328938	0.482886	0.114037	0.135044	False	False		Arpc5	0.34941	-0.0275831	0.179553	0.135774	0.0559156	0.0638394	False	False
ADPRHL1_-_114103424.23-P2|ADPRHL1_-_114103435.23-P2	ADPRHL1	0.46073	0.336553	0.0831406	0.0650955	0.682304	0.166022	-0.224707	0.0991772	False	False		4930404N11Rik	0.842362	0.0745013	-0.332634	0.0819385	0.859583	0.0657123	-0.0537687	0.00866482	False	False		Arrdc4	1.5306	-0.0834141	2.37856	0.0579953	-0.0750421	0.0365962	False	False
ADPRHL1_+_114107736.23-P1|ADPRHL1_+_114107533.23-P1	ADPRHL1	0.196227	0.707241	0.076668	0.126144	0.332304	0.478465	-0.737049	0.937507	False	False		4930407I10Rik	0.0353137	1.45206	0.518999	2.49177	0.851014	0.0700635	-0.169426	0.029111	False	False		Arsa	0.183357	-0.0112652	0.0384811	0.0686503	0.0669217	0.038632	False	False
ADPRHL2_+_36554555.23-P1P2|ADPRHL2_-_36554523.23-P1P2	ADPRHL2	0.0405531	1.39198	-0.661412	2.14184	0.874458	0.0582611	-0.0839319	0.0129997	False	False		4930412D23Rik	0.939691	0.027015	-0.0520466	0.00464894	0.770897	0.113004	-0.216346	0.0599551	False	False		Arsj	0.612467	-0.0591642	0.67508	0.726205	-0.0924558	0.564588	False	False
ADPRM_-_10600988.23-P1P2|ADPRM_+_10600958.23-P1P2	ADPRM	0.0289648	1.53813	-1.10594	3.9574	0.833704	0.0789884	0.000665398	0.000139725	False	False		4930415F15Rik	0.458856	0.338323	-0.156561	0.175135	0.336203	0.473398	0.185237	0.215049	False	False		Art1	0.275669	-0.0474386	0.243631	0.841443	0.112271	0.794382	False	False
ADRA1A_-_26724797.23-P1P2|ADRA1A_+_26724406.23-P1P2	ADRA1A	0.838773	0.0763556	-0.229157	0.040706	0.675852	0.170148	-0.228918	0.103547	False	False		4930415L06Rik	0.223049	0.651599	0.104431	0.224991	0.070098	1.15429	0.459578	1.30095	False	False		Ascc3	0.910993	-0.0568799	0.965356	0.350969	0.0299703	0.0884501	False	False
ADRA1B_+_159343520.23-P1P2|ADRA1B_-_159343504.23-P1P2	ADRA1B	0.253075	0.59675	0.0490674	0.0681191	0.393378	0.40519	-0.240604	0.259173	False	False		4930415O20Rik	0.34816	0.458221	-0.556852	0.843668	0.999675	0.000141077	-0.0237541	8.21823e-06	False	False		Asf1a	0.070047	-0.0959175	0.12517	0.101901	-0.0334178	0.0286348	False	False
ADRA1D_-_4229926.23-P1P2|ADRA1D_-_4229650.23-P1P2	ADRA1D	0.497164	0.3035	0.00460741	0.00325311	0.570834	0.24349	0.183753	0.118944	False	False		4930422G04Rik	0.931095	0.0310058	-0.103276	0.0105876	0.401251	0.396584	-0.489859	0.476421	False	False		Asgr2	0.460589	0.0542483	0.465493	0.691735	-0.134224	0.780746	False	False
ADRA2A_+_112836769.23-P1P2|ADRA2A_+_112836955.23-P1P2	ADRA2A	0.864181	0.0633955	-0.151903	0.022403	0.542806	0.265355	-0.22678	0.159978	False	False		4930427A07Rik	0.528848	0.276669	0.155872	0.142589	0.895167	0.0480959	0.0182275	0.0021499	False	False		Asl	0.786734	0.113325	1.66099	0.846409	-0.218673	1.55637	False	False
ADRA2B_-_96782246.23-P1P2|ADRA2B_-_96782243.23-P1P2	ADRA2B	0.0915358	1.03841	0.294474	0.711374	0.198668	0.701872	-0.567296	1.05851	False	False		4930428D18Rik	0.343002	0.464704	0.214106	0.328975	0.537485	0.269634	-0.267368	0.176794	False	False		Asna1	0.191829	-0.0284513	0.101679	0.0993711	-0.0504325	0.0421414	False	False
ADRA2C_-_3767700.23-P1P2|ADRA2C_-_3767703.23-P1P2	ADRA2C	0.0336176	1.47343	-0.988986	3.39003	0.174548	0.758084	-0.533892	1.07597	False	False		4930430A15Rik	0.288845	0.539335	0.452903	0.807645	0.408642	0.388657	-0.4252	0.405269	False	False		Asns	3.75719	-0.262982	18.4078	0.38081	0.0429627	0.137575	True	False
ADRB1_+_115803641.23-P1P2|ADRB1_-_115803895.23-P1P2	ADRB1	0.327452	0.484852	0.061797	0.0697044	0.183613	0.736097	0.263244	0.515136	False	False		4930430D24Rik	0.336441	0.473091	-0.339343	0.530812	0.525071	0.279782	0.364418	0.250036	False	False		Aspa	0.17083	0.00848157	0.0269932	0.0196371	-0.0223914	0.00369741	False	False
ADRB2_-_148206186.23-P1P2|ADRB2_+_148206227.23-P1P2	ADRB2	0.0831914	1.07992	-0.300039	0.753796	0.900506	0.0455132	0.00639447	0.000773695	False	False		4930430F08Rik	0.873478	0.0587482	-0.0844297	0.0164001	0.56324	0.249307	-0.244532	0.149504	False	False		Asph	0.493053	-0.0311339	0.285983	0.0229027	0.0762822	0.0146909	False	False
ADRB3_+_37824097.23-P1P2|ADRB3_-_37823993.23-P1P2	ADRB3	0.123152	0.90956	0.259958	0.550071	0.254379	0.594519	-0.29055	0.459213	False	False		4930432K09Rik	0.856478	0.0672839	-0.026286	0.0058478	0.778703	0.108628	-0.0580867	0.015474	False	False		Aspm	0.566706	-0.0294203	0.310612	0.187191	-0.212773	0.334919	False	False
ADRBK1_-_67033953.23-P1P2|ADRBK1_+_67033933.23-P1P2	ADRBK1	0.0372849	1.42847	0.208359	0.692414	0.291502	0.535359	-0.403821	0.574727	False	False		4930432K21Rik	0.776996	0.109581	-0.390267	0.141402	0.199328	0.700432	0.377304	0.648098	False	False		Aspscr1	0.210523	-0.0118598	0.0465145	0.0710469	0.101538	0.0606614	False	False
ADRBK2_+_25960616.23-P1P2|ADRBK2_-_25960625.23-P1P2	ADRBK2	0.057415	1.24098	-1.20663	3.48355	0.105091	0.978434	-0.749274	1.94895	False	False		4930432M17Rik	0.524144	0.28055	-0.0333852	0.0309686	0.363972	0.438932	0.0130954	0.0140961	False	False		Asrgl1	0.805681	0.0797243	1.19665	0.130443	-0.0606908	0.0665706	False	False
ADRM1_+_60878013.23-P1P2|ADRM1_-_60878073.23-P1P2	ADRM1	0.822333	0.0849522	-0.136645	0.0270055	0.789761	0.102504	-0.105422	0.0287276	False	False		4930433I11Rik	0.115225	0.938452	0.550638	1.70858	0.963418	0.0161851	0.54238	0.0215279	False	False		Ass1	0.151775	0.017276	0.0488494	0.512051	-0.105662	0.454955	False	False
ADSL_-_40742737.23-P1P2|ADSL_-_40742729.23-P1P2	ADSL	0.00129662	2.88719	-1.49797	10.0615	0.06787	1.16832	-1.16089	3.60565	True	False		4930435E12Rik	0.337166	0.472156	-0.172891	0.269908	0.169295	0.771357	0.47739	0.903051	False	False		Astn1	0.278824	-0.0312616	0.162388	0.129117	-0.0449338	0.048786	False	False
ADSS_-_244615160.23-P1P2|ADSS_-_244615191.23-P1P2	ADSS	0.144527	0.840052	-2.03215	3.97142	0.357684	0.446501	-2.18763	2.59672	False	False		4930444G20Rik	0.847438	0.0718921	-0.0299787	0.0071261	0.400842	0.397026	-0.557642	0.542948	False	False		Atf1	0.534349	0.045694	0.454881	0.104441	-0.0150262	0.0131965	False	False
ADSSL1_-_105190615.23-P1P2|ADSSL1_-_105190666.23-P1P2	ADSSL1	0.0749032	1.1255	0.175204	0.458747	0.256862	0.5903	-0.429245	0.673605	False	False		4930444P10Rik	0.324978	0.488146	-0.351723	0.567685	0.284216	0.546351	-0.398308	0.533672	False	False		Atf2	0.817626	-0.0608064	0.926227	0.388214	0.229154	0.74806	False	False
ADTRP_-_11779009.23-P1P2|ADTRP_-_11778993.23-P1P2	ADTRP	0.167851	0.775076	-0.465447	0.839263	0.517896	0.285758	-0.151631	0.11519	False	False		4930447A16Rik	0.0161311	1.79234	0.422898	2.50618	0.562748	0.249686	-0.0344128	0.0210716	False	False		Atf3	0.173595	0.0258447	0.0835837	0.766155	-0.182961	1.17873	False	False
AEBP1_+_44143999.23-P1P2|AEBP1_+_44144026.23-P1P2	AEBP1	0.18111	0.742058	0.0584342	0.100876	0.200355	0.6982	0.221168	0.410515	False	False		4930447C04Rik	0.960476	0.0175135	-0.0558452	0.00323382	0.665819	0.176644	-0.170187	0.073724	False	False		Atf5	1.56954	-0.385804	11.2812	0.866266	0.0764849	0.557141	True	False
AEBP2_+_19592658.23-P1P2|AEBP2_+_19592704.23-P1P2	AEBP2	0.42474	0.371877	-0.36783	0.318222	0.0860067	1.06547	-0.381573	1.0808	False	False		4930451C15Rik	0.24807	0.605426	-0.506763	1.01443	0.227139	0.643708	0.509493	0.804286	False	False		Atg10	0.00924721	-0.0212808	0.00366617	0.324211	-0.0958176	0.261223	False	False
AEN_-_89164606.23-P1P2|AEN_-_89164638.23-P1P2	AEN	0.0414149	1.38284	0.189142	0.608479	0.904625	0.0435315	-0.0731154	0.00846138	False	False		4930451G09Rik	0.00993313	2.00291	-0.743925	4.92662	0.852155	0.0694813	0.43831	0.074685	False	False		Atg12	0.125457	-0.00116498	0.00272288	0.0229027	0.0432967	0.00833833	False	False
AES_-_3062479.23-P1P2|AES_-_3062476.23-P1P2	AES	0.950658	0.0219758	-0.206161	0.0105399	0.457033	0.340052	0.119185	0.107744	False	False		4930451I11Rik	0.0101633	1.99296	-1.08029	7.11865	0.896319	0.0475375	0.0658142	0.00767254	False	False		Atg14	1.45101	-0.170509	4.60927	0.138457	0.0469083	0.0546136	False	False
AFAP1_+_7941515.23-P1P2|AFAP1_-_7941481.23-P1P2	AFAP1	0.163262	0.787115	-0.390825	0.715655	0.672441	0.172346	0.233468	0.106969	False	False		4930452B06Rik	0.353742	0.451313	-0.147114	0.219527	0.659089	0.181056	0.117533	0.0521863	False	False		Atg3	0.91856	0.0971964	1.6633	0.381017	-0.0621246	0.199043	False	False
AFAP1L1_+_148651466.23-P1P2|AFAP1L1_-_148651676.23-P1P2	AFAP1L1	0.0838418	1.07654	0.100363	0.251354	0.494765	0.305601	-0.295215	0.23984	False	False		4930453N24Rik	0.62517	0.204002	-0.114727	0.0773852	0.613393	0.212261	-0.00056583	0.000294537	False	False		Atg4a	0.220779	-0.0118911	0.0489095	0.119912	0.010767	0.0108566	False	False
AFAP1L2_+_116164197.23-P1P2|AFAP1L2_-_116164240.23-P1P2	AFAP1L2	0.0663378	1.17824	0.265173	0.726853	0.693021	0.159253	0.141968	0.0601044	False	False		4930467E23Rik	0.049754	1.30317	-0.555997	2.39569	0.0997597	1.00104	0.529219	1.29919	False	False		Atg5	0.772655	0.0376028	0.541277	0.0306111	-0.0365993	0.00942085	False	False
AFF1_+_87856192.23-P1P2|AFF1_-_87856182.23-P1P2	AFF1	0.0929226	1.03188	0.442343	1.06187	0.183265	0.73692	-0.286478	0.561228	False	False		4930468A15Rik	0.531208	0.274735	-0.105389	0.095734	0.988383	0.00507468	0.00730314	9.0887e-05	False	False		Atg7	0.666268	0.0692928	0.860104	0.224113	0.0469113	0.0884061	False	False
AFF2_+_147582328.23-P1P2|AFF2_+_147582325.23-P1P2	AFF2	0.0895338	1.04801	0.227092	0.553671	0.751519	0.12406	-0.19872	0.0655393	False	False		4930474N05Rik	0.122552	0.91168	0.365077	1.10049	0.550531	0.259218	-0.161752	0.102825	False	False		Atic	0.317644	-0.0412468	0.244087	0.70754	-0.144307	0.858573	False	False
AFF3_+_100758974.23-P1P2|AFF3_-_100758793.23-P1P2	AFF3	0.969425	0.0134856	-0.170218	0.00534025	0.319495	0.495536	-0.344656	0.454035	False	False		4930480E11Rik	0.672846	0.172085	-0.0404093	0.0229922	0.376805	0.423883	-0.438148	0.455461	False	False		Atm	0.184762	0.0100431	0.0345695	1.72739	-0.215071	3.12399	False	False
AFF4_-_132299252.23-P1P2|AFF4_+_132299267.23-P1P2	AFF4	0.179568	0.745772	0.259772	0.450694	0.0869519	1.06072	0.366039	1.03218	False	False		4930486L24Rik	0.64515	0.190339	-0.169349	0.106579	0.711974	0.147536	0.0775216	0.0280481	False	False		Atoh7	0.959403	-0.0406145	0.725932	0.445649	-0.128388	0.481122	False	False
AFG3L2_-_12377212.23-P1P2|AFG3L2_-_12377232.23-P1P2	AFG3L2	0.0729655	1.13688	-6.34629	16.7849	0.167487	0.776019	-4.17075	8.60427	True	False		4930502E18Rik	0.0468102	1.32966	0.588733	2.58831	0.851014	0.0700635	0.0280554	0.0048205	False	False		Atox1	0.286762	0.0128636	0.0687226	0.32179	0.0374294	0.10128	False	False
AFM_+_74347558.23-P1P2|AFM_+_74347685.23-P1P2	AFM	0.282543	0.548916	-0.0432313	0.0552062	0.175826	0.754918	-0.422452	0.847822	False	False		4930503B20Rik	0.69188	0.15997	-0.119621	0.0632709	0.757569	0.120578	0.0337567	0.00998184	False	False		Atp11a	0.0879393	0.0101957	0.0167038	1.84834	-0.249859	3.88342	False	False
AFMID_+_76183477.23-P1P2|AFMID_+_76183490.23-P1P2	AFMID	0.498052	0.302726	0.05256	0.0370159	0.319844	0.495062	-0.617469	0.812648	False	False		4930503E14Rik	0.534047	0.27242	0.342652	0.308638	0.800001	0.0969095	0.0975284	0.0231783	False	False		Atp13a1	0.00203821	-0.0201921	0.000766732	0.0686503	-0.0366829	0.021176	False	False
AFP_-_74301991.23-P1|AFP_-_74301988.23-P1	AFP	0.479098	0.319576	0.0385493	0.0286599	0.252309	0.598067	0.738699	1.17448	False	False		4930503L19Rik	0.229128	0.639921	-0.336297	0.711554	0.677636	0.169003	-0.028774	0.0119256	False	False		Atp1a1	0.432657	0.0249692	0.201262	0.377437	0.0442387	0.140406	False	False
AFP_+_74316357.23-P2|AFP_+_74316369.23-P2	AFP	0.298875	0.52451	0.0345863	0.0422028	0.23652	0.626133	-0.434711	0.723594	False	False		4930504O13Rik	0.326397	0.486254	-0.623465	1.00238	0.0251809	1.59893	0.598692	2.34756	False	False		Atp2a1	0.494989	-0.0653533	0.602666	0.0906014	0.0322798	0.0245926	False	False
AFTPH_-_64751594.23-P1P2|AFTPH_-_64751572.23-P1P2	AFTPH	0.574969	0.240356	-0.123152	0.0688618	0.592284	0.22747	-0.242719	0.146776	False	False		4930505A04Rik	0.0389123	1.40991	-0.473638	2.20799	0.87677	0.0571143	-0.00464157	0.00065012	False	False		Atp2c1	0.923621	-0.0925322	1.59221	1.63765	0.219555	3.02346	False	False
AGA_+_178363535.23-P1P2|AGA_-_178363567.23-P1P2	AGA	0.334903	0.475081	-0.907402	1.00288	0.689798	0.161278	0.408561	0.17517	False	False		4930506M07Rik	0.848567	0.0713139	0.0268417	0.00632909	0.599658	0.222096	0.299547	0.163151	False	False		Atp4a	0.255432	0.0345824	0.164567	0.198812	-0.000313574	0.00052423	False	False
AGAP1_+_236403013.23-P1P2|AGAP1_-_236402788.23-P1P2	AGAP1	0.283635	0.547241	0.0667404	0.0849671	0.291192	0.535821	-0.260614	0.371233	False	False		4930511M11Rik	0.526023	0.278996	-0.0776537	0.0716336	0.762004	0.118043	-0.129937	0.0376147	False	False		Atp5a1	0.737953	-0.0499259	0.686386	0.588429	0.0320924	0.158794	False	False
AGAP11_-_88730150.23-P1P2|AGAP11_+_88730713.23-P1P2	AGAP11	0.0888484	1.05135	0.155011	0.379135	0.82366	0.0842523	-0.127496	0.0285567	False	False		4930513O06Rik	0.388806	0.410267	0.12316	0.167069	0.757016	0.120895	0.136686	0.0405243	False	False		Atp5b	0.196102	0.0319361	0.116675	0.149295	0.03838	0.0481826	False	False
AGAP2_+_58135895.23-P1P2|AGAP2_+_58135858.23-P1P2	AGAP2	0.322958	0.490854	-0.350543	0.400293	0.000941773	3.02605	0.34333	2.76196	False	False		4930519G04Rik	0.13906	0.856798	0.301054	0.852865	0.216131	0.665282	0.425922	0.694895	False	False		Atp5c1	2.44288	-0.210507	9.58038	2.52337	0.383698	8.1416	True	True
AGAP3_-_150783602.23-P1P2|AGAP3_+_150783556.23-P1P2	AGAP3	0.956561	0.0192874	-0.158099	0.00709392	0.873094	0.0589388	0.0318712	0.00499377	False	False		4930522H14Rik	0.841798	0.074792	-0.140949	0.0348557	0.912466	0.0397834	0.128906	0.0125765	False	False		Atp5d	1.13102	-0.0620031	1.30647	0.579963	0.0446966	0.217978	False	False
AGBL1_+_86685262.23-ENST00000441037.2|AGBL1_+_86685489.23-ENST00000441037.2	AGBL1	0.0810846	1.09106	0.195551	0.496356	0.668358	0.174991	-0.121574	0.056557	False	False		4930523C07Rik	0.352248	0.453151	-0.625513	0.937211	0.957617	0.0188082	-0.538297	0.0248287	False	False		Atp5j2	1.03019	-0.0489229	0.938951	0.811924	0.0501106	0.342124	False	False
AGBL1_+_86686989.23-ENST00000421325.2|AGBL1_+_86687018.23-ENST00000421325.2	AGBL1	0.825006	0.0835429	-0.122636	0.0238348	0.126401	0.898249	0.740654	1.76864	False	False		4930524B15Rik	0.744113	0.128361	0.176047	0.0747169	0.741011	0.130175	0.0625698	0.0199745	False	False		Atp6v0a1	1.46361	-0.0973577	2.65466	0.590554	0.0817784	0.406103	False	False
AGBL2_+_47736890.23-P1P2|AGBL2_+_47736896.23-P1P2	AGBL2	0.318151	0.497367	0.389965	0.451217	0.0957299	1.01895	-0.958688	2.59692	False	False		4930524N10Rik	0.855347	0.0678578	-0.0557754	0.0125141	0.0466308	1.33133	0.533944	1.74327	False	False		Atp6v0a4	0.241698	0.0210557	0.0948105	0.0350721	0.0590516	0.0174154	False	False
AGBL3_-_134671328.23-P1P2|AGBL3_-_134671452.23-P1P2	AGBL3	0.326967	0.485497	-0.276824	0.312661	0.0133546	1.87437	0.307024	1.52988	False	False		4930525M21RIK	0.5148	0.288362	0.0987712	0.0941728	0.407817	0.389535	-0.203953	0.194832	False	False		Atp6v1a	3.66122	-0.339777	23.1757	0.429885	0.0802848	0.290218	True	False
AGBL4_-_50489570.23-P1P2|AGBL4_-_50489541.23-P1P2	AGBL4	0.29882	0.52459	0.0627905	0.0766299	0.341047	0.467186	0.357194	0.443631	False	False		4930526D03Rik	0.53547	0.271265	-0.40082	0.359501	0.755355	0.121849	-0.147108	0.0439582	False	False		Atp6v1b2	3.78776	-0.537659	37.9405	0.437182	0.0665924	0.244808	True	False
AGBL5_+_27274578.23-P1|AGBL5_+_27274969.23-P1	AGBL5	0.0142198	1.84711	-2.04715	8.79679	0.209882	0.678025	-0.790374	1.42464	False	False		4930529M08Rik	0.267458	0.572744	0.318438	0.603035	0.473322	0.324844	-0.334292	0.266308	False	False		Atp6v1c1	0.20678	0.0254167	0.0979133	0.374807	-0.0787763	0.24828	False	False
AGBL5_+_27276183.23-P2|AGBL5_+_27275965.23-P2	AGBL5	0.513396	0.289547	0.00233083	0.00157005	0.67248	0.172321	-0.140382	0.06431	False	False		4930538K18Rik	0.737038	0.13251	-0.0227999	0.00998942	0.540853	0.266921	-0.2779	0.18191	False	False		Atp6v1d	0.878535	-0.0952631	1.55918	0.134437	0.0680484	0.0769266	False	False
AGER_+_32151968.23-P1P2|AGER_+_32151976.23-P1P2	AGER	0.517096	0.286429	0.2007	0.133736	0.61005	0.214635	-0.392021	0.223686	False	False		4930539E08Rik	0.826051	0.0829933	-0.0654457	0.017959	0.42156	0.375141	-0.319446	0.293883	False	False		Atp6v1e1	1.39192	-0.0587143	1.52255	0.616295	-0.123593	0.640502	False	False
AGFG1_-_228336893.23-P1P2|AGFG1_-_228336896.23-P1P2	AGFG1	0.603836	0.219081	-0.134733	0.0686694	0.99144	0.00373348	-0.0410947	0.000407876	False	False		4930544D05Rik	0.58891	0.229951	-0.390597	0.296977	0.173167	0.761535	0.256566	0.479151	False	False		Atp6v1g1	0.93378	-0.136574	2.37589	0.508046	0.114472	0.489037	False	False
AGFG2_-_100136951.23-P1P2|AGFG2_-_100136848.23-P1P2	AGFG2	0.458647	0.338521	0.0218053	0.0171725	0.187427	0.727167	0.196959	0.380749	False	False		4930544G11Rik	0.415102	0.381845	-0.280072	0.353602	0.910157	0.0408838	-0.115898	0.0116201	False	False		Atp6v1g2	0.309364	0.0371898	0.214342	0.0955966	-0.00826439	0.00664341	False	False
AGGF1_+_76326273.23-P1P2|AGGF1_+_76326308.23-P1P2	AGGF1	0.0898329	1.04656	-0.851858	2.07404	0.343513	0.464057	-0.698696	0.861961	False	False		4930547C10Rik	0.354491	0.450395	-0.23932	0.356395	0.658562	0.181403	0.0375465	0.0167032	False	False		Atp6v1g3	0.464363	0.0530083	0.45858	1.14011	-0.203871	1.95452	False	False
AGK_-_141251386.23-P1P2|AGK_-_141251280.23-P1P2	AGK	0.828784	0.0815585	-0.121359	0.0230264	0.0221911	1.65382	0.280332	1.23251	False	False		4930548H24Rik	0.833354	0.0791706	-0.215646	0.0564499	0.693154	0.15917	-0.0738318	0.0288197	False	False		Atp8a1	0.494989	-0.135327	1.24794	0.714634	0.0693938	0.417006	False	False
AGL_-_100315679.23-P1P2|AGL_-_100315704.23-P1P2	AGL	0.238869	0.62184	0.42015	0.607808	0.575926	0.239633	0.0449032	0.0286057	False	False		4930549C01Rik	0.415102	0.381845	-0.216766	0.273675	0.599658	0.222096	0.121299	0.0660665	False	False		Atp8a2	0.317571	0.013911	0.0823023	0.590554	0.00263255	0.013073	False	False
AGMAT_-_15911533.23-P1P2|AGMAT_+_15911485.23-P1P2	AGMAT	0.0870412	1.06027	0.0671703	0.165684	0.876947	0.0570266	0.00556041	0.000842971	False	False		4930550C14Rik	0.214681	0.668207	-0.448935	0.991864	0.120115	0.920403	0.641736	1.4485	False	False		Atr	3.43415	-0.307009	19.6419	0.0522394	-0.0285712	0.0125506	True	False
AGMO_+_15601600.23-P1P2|AGMO_-_15601543.23-P1P2	AGMO	0.378403	0.422045	-0.0224855	0.0220772	0.292534	0.533824	0.233287	0.331068	False	False		4930550L24Rik	0.941984	0.0259564	-0.0529401	0.00454345	0.787651	0.103666	0.096577	0.0245524	False	False		Atraid	0.225216	-0.0117127	0.0491441	0.242471	-0.26436	0.539006	False	False
AGO1_-_36349067.23-P1P2|AGO1_-_36349041.23-P1P2	AGO1	0.156873	0.804453	-0.799001	1.49531	0.176528	0.753186	-0.419554	0.840076	False	False		4930557A04Rik	0.33216	0.478652	0.140847	0.222908	0.91862	0.0368643	-0.0390381	0.00352922	False	False		Atrnl1	0.97753	-0.122147	2.22446	0.814366	0.22285	1.52605	False	False
AGO2_-_141645534.23-P1P2|AGO2_+_141645724.23-P1P2	AGO2	0.347371	0.459207	-0.673638	0.719646	0.207718	0.682526	0.512945	0.930717	False	False		4930558K02Rik	0.325687	0.487199	0.269404	0.433979	0.539889	0.267695	0.165547	0.108679	False	False		Atrx	0.791452	0.0420668	0.620266	0.436186	0.0411779	0.151034	False	False
AGO3_+_36396775.23-P1P2|AGO3_-_36396745.23-P1P2	AGO3	0.0713049	1.14688	0.389702	1.03976	0.199476	0.70011	-0.743911	1.38457	False	False		4930562C15Rik	0.0905344	1.04319	0.357065	1.23159	0.228824	0.640498	1.06224	1.66849	False	False		Atxn10	0.297994	-0.0456231	0.253283	0.638098	-0.205532	1.10282	False	False
AGO4_+_36273634.23-P1P2|AGO4_+_36273598.23-P1P2	AGO4	0.163103	0.787539	-0.83548	1.53071	0.495583	0.304883	-0.149943	0.121531	False	False		4930563D23Rik	0.88712	0.0520177	-0.224031	0.0385316	0.344313	0.463047	-0.298388	0.338837	False	False		Atxn3	0.246251	0.0194816	0.0893748	0.0844176	-0.0715972	0.0508238	False	False
AGPAT1_+_32143853.23-P1|AGPAT1_+_32143856.23-P1	AGPAT1	0.13461	0.870923	-0.784237	1.58895	0.910929	0.0405153	-0.0983879	0.0105971	False	False		4930564B18Rik	0.0532053	1.27405	0.444904	1.87417	0.694767	0.158161	-0.191339	0.0742141	False	False		Aurka	3.21456	-0.516663	30.9416	0.244012	-0.00541419	0.0111092	True	False
AGPAT1_+_32144829.23-P2|AGPAT1_+_32145529.23-P2	AGPAT1	0.378604	0.421815	0.423968	0.416044	0.591029	0.228391	-0.533429	0.323881	False	False		4930564D02Rik	0.477414	0.321105	-0.196512	0.208639	0.799439	0.0972149	-0.211974	0.0505359	False	False		Aurkaip1	1.18738	-0.087648	1.93886	0.182879	0.0498777	0.0767023	False	False
AGPAT2_+_139581621.23-P1P2|AGPAT2_-_139581678.23-P1P2	AGPAT2	0.498848	0.302032	-0.00768378	0.00539897	0.124068	0.906342	0.468296	1.12834	False	False		4930567H17Rik	0.873478	0.0587482	-0.167938	0.0326213	0.807322	0.092953	0.100306	0.0228652	False	False		Aurkb	2.47973	-0.59457	27.4676	0.655377	0.106335	0.586009	True	False
AGPAT3_+_45285114.23-P1P2|AGPAT3_+_45285099.23-P1P2	AGPAT3	0.0628362	1.20179	0.147147	0.411401	0.715131	0.145615	0.00343673	0.00133039	False	False		4930568D16Rik	0.278491	0.555189	0.313512	0.575509	0.133318	0.875112	-1.52943	3.28229	False	False		Aurkc	0.214902	-0.018771	0.0751522	0.0244802	-0.0164221	0.0033805	False	False
AGPAT4_+_161694832.23-P1P2|AGPAT4_-_161695108.23-P1P2	AGPAT4	0.5665	0.2468	-0.301828	0.173296	0.328122	0.483964	-0.252964	0.325462	False	False		4930571K23Rik	0.573602	0.241389	-0.186388	0.148762	0.292147	0.534399	-0.358928	0.470388	False	False		Aven	0.216367	0.0362433	0.146094	0.361475	-0.124577	0.378664	False	False
AGPAT5_+_6566209.23-P1P2|AGPAT5_+_6566173.23-P1P2	AGPAT5	0.0302584	1.51915	0.486541	1.71951	0.252316	0.598056	0.199628	0.317388	False	False		4930578C19Rik	0.187538	0.72691	0.303612	0.729722	0.00822579	2.08482	-0.627735	3.20944	False	False		Avpi1	0.145097	-0.0247596	0.0669291	0.889154	-0.203993	1.52522	False	False
AGPAT6_+_41435781.23-P1P2|AGPAT6_-_41435749.23-P1P2	AGPAT6	0.00572159	2.24248	-0.8697	4.53714	0.0463919	1.33356	0.193245	0.685091	False	False		4930578I06Rik	0.691348	0.160303	0.0870446	0.0461362	0.294488	0.530933	0.399433	0.520076	False	False		Avpr1a	0.356244	-0.0632956	0.420083	0.520101	0.145023	0.634252	False	False
AGPAT9_+_84457483.23-P1P2|AGPAT9_+_84457464.23-P1P2	AGPAT9	0.0395112	1.40328	-0.0228409	0.074566	0.441182	0.355382	0.300622	0.284017	False	False		4930579F01Rik	0.493642	0.306588	0.172763	0.175131	0.732777	0.135028	-0.211404	0.070004	False	False		Avpr1b	0.296381	-0.0502376	0.277391	0.0239962	-0.0342013	0.00690119	False	False
AGPS_-_178257526.23-P1P2|AGPS_-_178257523.23-P1P2	AGPS	0.739573	0.131019	-0.118117	0.0360022	0.696892	0.156834	0.259153	0.10805	False	False		4930579G24Rik	0.530263	0.275508	-0.226473	0.206304	0.365899	0.436639	0.506583	0.542447	False	False		Avpr2	0.247774	0.0206713	0.0954193	0.00469778	-0.0448215	0.00177059	False	False
AGR2_+_16844571.23-P1P2|AGR2_+_16844579.23-P1P2	AGR2	0.510281	0.29219	-0.0797326	0.0541982	0.642601	0.192059	-0.172896	0.0882769	False	False		4930590J08Rik	0.737038	0.13251	0.0930016	0.0407472	0.31894	0.496291	0.261693	0.318502	False	False		Axin1	0.74254	0.0681792	0.943161	0.470614	-0.116356	0.460458	False	False
AGR3_+_16921530.23-P1P2|AGR3_-_16921591.23-P1P2	AGR3	0.15779	0.801921	0.730592	1.36298	0.563004	0.249489	-0.17798	0.118045	False	False		4930595M18Rik	0.172883	0.762248	-0.387477	0.976563	0.292682	0.533605	0.294958	0.385979	False	False		Axin2	0.129338	0.0368932	0.0888966	0.330282	0.037368	0.103782	False	False
AGRN_+_955534.23-P1P2|AGRN_+_955472.23-P1P2	AGRN	0.1801	0.744487	0.414999	0.718765	0.893532	0.0488899	0.0171417	0.00222793	False	False		4930596D02Rik	0.968962	0.0136932	-0.0210338	0.000952314	0.141407	0.849528	-0.413378	0.86121	False	False		Axl	1.3613	-0.127325	3.22911	0.482313	0.0849788	0.34465	False	False
AGRP_+_67517230.23-P1P2|AGRP_+_67517365.23-P1P2	AGRP	0.398669	0.399387	0.129446	0.120272	0.0722411	1.14122	-0.540604	1.64012	False	False		4931406B18Rik	0.217624	0.662293	-0.359128	0.786424	0.026539	1.57611	0.700762	2.70858	False	False		Azgp1	0.213439	-0.0194282	0.0772538	0.149295	0.1422	0.178519	False	False
AGT_+_230849819.23-P1P2|AGT_-_230849666.23-P1P2	AGT	0.09229	1.03485	0.032999	0.0794437	0.485441	0.313863	-0.137597	0.11481	False	False		4931406C07Rik	0.263438	0.579322	0.0891388	0.170743	0.841892	0.0747434	-0.206617	0.0378724	False	False		Azi1	0.928694	0.0881935	1.52589	1.21845	-0.239561	2.4545	False	False
AGTPBP1_-_88356703.23-P1P2|AGTPBP1_-_88356586.23-P1P2	AGTPBP1	0.73403	0.134286	-0.255931	0.0799536	0.808137	0.0925152	-0.188466	0.0463526	False	False		4931406P16Rik	0.00124832	2.90367	-1.32839	12.7535	0.09848	1.00665	1.2189	3.00905	True	False		B2m	0.168076	0.014802	0.0463489	0.642497	-0.199148	1.07593	False	False
AGTR1_-_148415748.23-P1P2|AGTR1_-_148415793.23-P1P2	AGTR1	0.590352	0.228889	-0.029871	0.0159059	0.563863	0.248826	-0.370963	0.245389	False	False		4931408C20Rik	0.36355	0.439435	-0.153347	0.222807	0.283562	0.547352	-0.268525	0.360442	False	False		B3galt4	0.00101791	-0.00277352	5.25964e-05	0.122528	0.0784723	0.080852	False	False
AGTR2_-_115301994.23-P1P2|AGTR2_-_115302232.23-P1P2	AGTR2	0.495456	0.304995	0.00778221	0.00552178	0.145423	0.837366	0.239716	0.533632	False	False		4931409K22Rik	0.279451	0.553695	-0.199678	0.36556	0.606763	0.216981	-0.292975	0.155896	False	False		B3gat1	1.39809	-0.125586	3.27105	0.945898	0.30714	2.44297	False	False
AGTRAP_+_11796247.23-P1P2|AGTRAP_+_11796254.23-P1P2	AGTRAP	0.663044	0.178457	-0.147769	0.061348	0.0401003	1.39685	0.832132	3.09009	False	False		4931414P19Rik	0.361651	0.44171	-0.269184	0.393138	0.191539	0.717744	-0.608325	1.07075	False	False		B3gat3	0.232666	0.0236154	0.102363	0.100635	-0.0684603	0.0579328	False	False
AGXT_-_241808273.23-P1P2|AGXT_+_241808483.23-P1P2	AGXT	0.769718	0.113668	-0.111144	0.0293906	0.786764	0.104156	0.017307	0.00479218	False	False		4931417E11Rik	0.778698	0.108631	-0.106438	0.0382303	0.130332	0.884949	-0.817429	1.77399	False	False		B3gnt3	0.428982	-0.0740333	0.591671	0.909602	0.382513	2.92574	False	False
AGXT2_-_35047966.23-P1P2|AGXT2_-_35047958.23-P1P2	AGXT2	0.316189	0.500053	-0.277646	0.322992	0.666416	0.176254	0.0798138	0.0373978	False	False		4931423N10Rik	0.687632	0.162644	-0.362081	0.194716	0.643356	0.191548	-0.17153	0.0805754	False	False		B3gnt6	0.270957	-0.00988547	0.0499012	0.0615234	-0.0579212	0.0299651	False	False
AHCTF1_-_247095134.23-P1P2|AHCTF1_+_247094988.23-P1P2	AHCTF1	0.0051705	2.28647	-3.80492	20.2392	0.134421	0.871532	-1.76406	4.0872	True	False		4931428F04Rik	0.372754	0.428578	-0.287651	0.407618	0.417785	0.379047	0.277506	0.257958	False	False		B3gnt7	0.00101791	-0.0151402	0.000287115	0.0498543	-0.0160702	0.00673696	False	False
AHCY_-_32891145.23-P1P2|AHCY_-_32890950.23-P1P2	AHCY	0.0025128	2.59984	-2.14009	12.9438	0.513717	0.289276	0.0463784	0.0356662	True	False		4931429I11Rik	0.764367	0.116698	0.131034	0.0505597	0.827683	0.0821357	0.0946968	0.0190744	False	False		B4galt1	1.37964	-0.0853492	2.1937	0.700856	0.0881021	0.519222	False	False
AHCYL1_-_110527422.23-P1|AHCYL1_-_110527436.23-P1	AHCYL1	0.194586	0.710889	-0.553013	0.914578	0.364078	0.438805	-0.344713	0.402123	False	False		4931429L15Rik	0.51155	0.291112	-0.19947	0.191997	0.0549463	1.26006	0.460429	1.42278	False	False		B4galt2	0.774994	-0.0428313	0.618406	0.705435	0.127123	0.754087	False	False
AHCYL1_-_110546765.23-P2|AHCYL1_+_110546691.23-P2	AHCYL1	0.268848	0.570493	0.124778	0.165604	0.710503	0.148434	-0.0858351	0.033871	False	False		4931431F19Rik	0.267769	0.57224	-0.345662	0.654014	0.503472	0.298025	-0.232073	0.169614	False	False		B4galt3	0.207617	-0.0377912	0.146173	0.490175	0.0432479	0.17826	False	False
AHCYL2_+_128864979.23-P1P2|AHCYL2_-_128864878.23-P1P2	AHCYL2	0.100828	0.996421	-0.972973	2.25542	0.277377	0.556929	0.727112	1.07654	False	False		4931440F15Rik	0.769319	0.113894	0.0813304	0.0306274	0.936752	0.0283753	0.0183634	0.00127784	False	False		B4galt4	0.066537	-0.0216546	0.0268428	0.0295023	-0.0553594	0.0137336	False	False
AHDC1_+_27930650.23-P1P2|AHDC1_+_27930664.23-P1P2	AHDC1	0.867033	0.0619645	-0.213148	0.0307261	0.957294	0.0189545	-0.0675325	0.00340293	False	False		4931440L10Rik	0.280092	0.5527	-0.403071	0.736594	0.754249	0.122485	0.202619	0.0608622	False	False		B4galt5	0.470048	-0.0470041	0.411615	0.19589	-0.0131248	0.0216193	False	False
AHI1_-_135818658.23-P1P2|AHI1_-_135818819.23-P1P2	AHI1	0.742312	0.129414	-0.276493	0.0832431	0.279283	0.553956	-0.558093	0.821883	False	False		4932411E22Rik	0.137527	0.861614	0.35382	1.00798	0.350288	0.455575	-0.231633	0.258788	False	False		B4galt6	0.901086	0.0773298	1.29816	1.12993	-0.197205	1.87373	False	False
AHNAK_-_62314257.23-P1|AHNAK_-_62314203.23-P1	AHNAK	0.0468828	1.32899	0.194958	0.60276	0.957629	0.0188028	-0.0238001	0.00118967	False	False		4932411N23Rik	0.290486	0.536874	0.0918062	0.162968	0.239995	0.619799	0.477435	0.725685	False	False		Baat	0.0771353	-0.00527659	0.00758263	0.191527	0.0273235	0.0440054	False	False
AHNAK_+_62313083.23-P2|AHNAK_+_62313086.23-P2	AHNAK	0.188717	0.724189	-0.112396	0.189359	0.802447	0.0955834	0.00352217	0.000894995	False	False		4932414N04Rik	0.751757	0.123923	-0.0671807	0.0275266	0.829386	0.0812435	0.0334187	0.00665828	False	False		Bace1	0.60614	-0.0234844	0.265195	0.0844176	-0.0708757	0.0503117	False	False
AHNAK2_-_105436753.23-P1|AHNAK2_-_105436781.23-P1	AHNAK2	0.0445575	1.35108	0.0229569	0.0721569	0.862816	0.064082	-0.0538553	0.00917472	False	False		4932418E24Rik	0.218971	0.659613	-0.278175	0.606686	0.653828	0.184537	0.148899	0.0673844	False	False		Bad	0.115224	0.00686139	0.0147289	0.11084	0.0282451	0.0263256	False	False
AHNAK2_+_105444688.23-P2|AHNAK2_-_105444648.23-P2	AHNAK2	0.201464	0.695802	0.186801	0.302376	0.424134	0.372497	0.0887296	0.0878657	False	False		4932429P05Rik	0.213883	0.669824	0.307564	0.681167	0.876196	0.0573987	-0.0972156	0.0136843	False	False		Bag1	0.604037	-0.0824624	0.927968	0.247791	0.0209971	0.0437505	False	False
AHR_-_17338343.23-P1P2|AHR_+_17338317.23-P1P2	AHR	0.023777	1.62384	0.602962	2.27781	0.708294	0.149786	0.0494986	0.0197103	False	False		4932438A13Rik	0.554134	0.256385	-0.202884	0.171987	0.19055	0.719991	-0.646502	1.14151	False	False		Bai1	0.648842	0.0260721	0.315159	1.63425	-0.2851	3.91789	False	False
AHRR_+_321892.23-P1P2|AHRR_+_322709.23-P1P2	AHRR	0.166542	0.778477	-0.842735	1.52623	0.104671	0.980172	-0.27351	0.712695	False	False		4932438H23Rik	0.983903	0.00704757	-0.010616	0.000247376	0.0825122	1.08348	0.624137	1.65839	False	False		Bai3	0.0940309	-0.0206445	0.036165	0.55487	-0.0110182	0.0514092	False	False
AHSA1_-_77924482.23-P1P2|AHSA1_-_77924875.23-P1P2	AHSA1	0.171805	0.764965	0.125235	0.22287	0.201129	0.696525	0.642778	1.19022	False	False		4932443I19Rik	0.207578	0.682818	-0.296722	0.669904	0.775355	0.1105	0.14441	0.0391328	False	False		Baiap2l1	1.23632	0.0727432	1.67547	0.655771	-0.161854	0.892512	False	False
AHSA2_+_61404654.23-P1P2|AHSA2_+_61404634.23-P1P2	AHSA2	0.250936	0.600437	0.200608	0.28022	0.481792	0.317141	0.292548	0.246647	False	False		4933402D24Rik	0.764917	0.116386	-0.175255	0.0674418	0.835065	0.0782795	0.0868245	0.0166676	False	False		Bak1	0.267829	-0.0610116	0.304428	0.217011	-0.106202	0.193799	False	False
AHSG_+_186330893.23-P1P2|AHSG_+_186330836.23-P1P2	AHSG	0.0420308	1.37643	0.0575581	0.184308	0.68969	0.161346	0.170181	0.072996	False	False		4933402E13Rik	0.632843	0.198704	-0.105877	0.0695607	0.921131	0.0356784	-0.320625	0.0280535	False	False		Banp	0.0515881	0.0339817	0.0326594	0.603367	-0.170393	0.864514	False	False
AHSP_-_31539252.23-P1P2|AHSP_+_31539439.23-P1P2	AHSP	0.788168	0.103381	-0.102692	0.024698	0.610624	0.214226	0.113677	0.0647404	False	False		4933402J07Rik	0.838418	0.0765393	-0.0673007	0.0170318	0.286514	0.542854	0.210493	0.280223	False	False		Bard1	0.462474	-0.0861742	0.74247	1.33602	-0.502348	5.64361	False	False
AICDA_+_8765390.23-P1P2|AICDA_+_8765359.23-P1P2	AICDA	0.304097	0.516988	-0.0469582	0.0564775	0.558469	0.253001	-0.408699	0.274886	False	False		4933402N03Rik	0.287537	0.541306	-0.173836	0.311129	0.875622	0.0576832	0.0352562	0.00498734	False	False		Bax	0.479581	0.0309959	0.276937	0.122528	-0.196887	0.202858	False	False
AIF1_+_31583079.23-P1P2|AIF1_-_31583032.23-P1P2	AIF1	0.451054	0.345772	-0.0171897	0.0138274	0.0367055	1.43527	0.53415	2.0381	False	False		4933402P03Rik	0.521799	0.282496	-0.0976548	0.0912145	0.35785	0.4463	-0.181433	0.198575	False	False		Bbox1	0.163965	-0.00845756	0.025835	0.272391	-0.110753	0.25368	False	False
AIF1L_+_133971957.23-P1P2|AIF1L_+_133971935.23-P1P2	AIF1L	0.0780779	1.10747	-0.88205	2.27253	0.109398	0.96099	-0.494197	1.26255	False	False		4933403O08Rik	0.505083	0.296638	-0.0177139	0.0173739	0.440732	0.355825	-0.237152	0.206942	False	False		Bbs4	0.0348621	0.00105816	0.000687255	0.382812	0.0518089	0.166774	False	False
AIFM1_-_129299770.23-P1P2|AIFM1_+_129299638.23-P1P2	AIFM1	0.115394	0.937817	-1.16004	2.5309	0.92026	0.0360894	0.0123034	0.00118041	False	False		4933405L10Rik	0.34816	0.458221	-0.216007	0.327266	0.392326	0.406352	0.353211	0.351983	False	False		BC021891	1.30302	0.061404	1.4906	1.00002	-0.18146	1.52591	False	False
AIFM2_+_71892557.23-P1P2|AIFM2_+_71892542.23-P1P2	AIFM2	0.964424	0.0157318	-0.193922	0.00709724	0.66536	0.176943	0.00290591	0.00136693	False	False		4933405O20Rik	0.272464	0.564691	0.232082	0.433322	0.76478	0.116464	-0.0694742	0.0198426	False	False		BC037034	0.820024	0.0811521	1.23977	0.532268	-0.0974847	0.43632	False	False
AIFM3_-_21321575.23-P1|AIFM3_-_21321616.23-P1	AIFM3	0.33909	0.469685	0.106552	0.116427	0.820054	0.0861573	-0.0967132	0.0221517	False	False		4933406J08Rik	0.0908451	1.0417	-0.431504	1.48622	0.865211	0.0628782	-0.00582547	0.000898286	False	False		BC052040	0.206168	-0.03808	0.146262	0.254941	-0.0874734	0.187523	False	False
AIFM3_+_21319479.23-P2|AIFM3_+_21319522.23-P2	AIFM3	0.00390142	2.40878	-0.527019	2.95329	0.32423	0.489147	-0.26761	0.347992	False	False		4933406M09Rik	0.389203	0.409824	0.160553	0.217557	0.411538	0.38559	0.342528	0.323895	False	False		BC053749	0.108913	0.0153363	0.0311182	0.0328365	0.00828142	0.00228665	False	False
AIG1_+_143382079.23-P1P2|AIG1_+_143382050.23-P1P2	AIG1	0.271089	0.566888	0.0440194	0.058053	0.589298	0.229665	0.0161495	0.00986012	False	False		4933408B17Rik	0.340258	0.468192	-0.321611	0.497865	0.657555	0.182068	0.0811731	0.0362434	False	False		Bcar1	0.54841	-0.0406714	0.415536	0.131772	0.0260682	0.028885	False	False
AIM1_-_106960473.23-P1P2|AIM1_-_106960486.23-P1P2	AIM1	0.852058	0.0695309	-0.275478	0.0445604	0.311186	0.50698	0.361129	0.486722	False	False		4933409G03Rik	0.285582	0.544269	0.406478	0.731489	0.719665	0.14287	-0.0269927	0.00945737	False	False		Bcas1	0.430818	0.0604569	0.485237	0.80219	0.0883716	0.596112	False	False
AIM1L_+_26662903.23-P2|AIM1L_+_26662898.23-P2	AIM1L	0.565054	0.24791	-0.267205	0.154107	0.487197	0.312295	0.135661	0.112629	False	False		4933411G11Rik	0.417581	0.379259	0.15755	0.197566	0.89344	0.0489347	0.06634	0.00796116	False	False		Bcas2	3.84415	-0.510091	36.531	2.42974	0.661561	13.5166	True	True
AIM1L_+_26680595.23-P1|AIM1L_+_26680576.23-P1	AIM1L	0.544544	0.263967	-0.126213	0.077506	0.824953	0.0835707	-0.115082	0.0255676	False	False		4933411K16Rik	0.593389	0.226661	0.148147	0.111026	0.470183	0.327733	0.290941	0.233835	False	False		Bcas3	0.0403756	-0.0169162	0.0127244	0.0844176	-0.0223341	0.015854	False	False
AIM2_-_159046491.23-P1P2|AIM2_+_159046458.23-P1P2	AIM2	0.954662	0.0201504	-0.192574	0.00902741	0.797562	0.0982358	0.13208	0.0344933	False	False		4933411K20Rik	0.641588	0.192743	-0.0152565	0.00972283	0.885386	0.0528674	0.0434818	0.0056374	False	False		Bcat1	0.445609	-0.0525176	0.435986	0.70773	-0.215071	1.27993	False	False
AIMP1_+_107237731.23-P1P2|AIMP1_+_107237742.23-P1P2	AIMP1	0.817957	0.0872695	-0.135372	0.0274837	0.627854	0.202141	0.0850959	0.045729	False	False		4933412E24Rik	0.0318303	1.49716	-0.457045	2.26248	0.0532542	1.27365	0.934625	2.91924	False	False		Bcat2	0.829649	0.0504132	0.779206	1.29018	-0.2144	2.32603	False	False
AIMP2_+_6048922.23-P1P2|AIMP2_-_6048940.23-P1P2	AIMP2	0.205107	0.68802	0.0731834	0.117138	0.221291	0.655036	-0.372018	0.647824	False	False		4933413G19Rik	0.670796	0.17341	-0.0754991	0.0432884	0.823164	0.0845137	-0.00839901	0.00174076	False	False		Bccip	2.41037	-0.37497	16.8381	0.451238	0.0254651	0.096625	True	False
AIP_+_67250544.23-P1P2|AIP_-_67250576.23-P1P2	AIP	0.101903	0.991815	0.403402	0.930792	0.438992	0.357543	-1.11243	1.05738	False	False		4933415F23Rik	0.375853	0.424982	-0.218723	0.307342	0.418204	0.378612	0.446805	0.414855	False	False		Bche	0.0867286	-0.0171991	0.0277896	0.80219	-0.0997159	0.672635	False	False
AIPL1_-_6338440.23-P1P2|AIPL1_-_6338416.23-P1P2	AIPL1	0.0716676	1.14468	-0.0520456	0.138596	0.857215	0.0669101	-0.0303264	0.00539436	False	False		4933416C03Rik	0.148538	0.828162	-0.319716	0.875461	0.543264	0.264989	0.16387	0.106491	False	False		Bckdk	1.83097	-0.0801673	2.73458	0.0556563	-0.00730824	0.00342031	False	False
AIRE_-_45705829.23-P1P2|AIRE_+_45705833.23-P1P2	AIRE	0.459558	0.33766	-0.453878	0.356535	0.875432	0.0577777	0.0630197	0.00967977	False	False		4933417A18Rik	0.0660421	1.18018	0.458433	1.78888	0.0481768	1.31716	-0.650565	2.10142	False	False		Bcl10	0.119042	0.0050929	0.0112948	0.0452595	0.0590463	0.0224719	False	False
AJAP1_-_4714684.23-P1P2|AJAP1_-_4714913.23-P1P2	AJAP1	0.330597	0.480701	0.0700764	0.0783664	0.572792	0.242003	-0.111129	0.071495	False	False		4933421I07Rik	0.664452	0.177536	0.0324358	0.0190401	0.753696	0.122804	-0.170776	0.0514308	False	False		Bcl11a	1.057	0.118599	2.33545	1.46529	-0.326299	4.02047	False	False
AJUBA_+_23451323.23-P1P2|AJUBA_+_23451722.23-P1P2	AJUBA	0.984994	0.00656662	-0.17974	0.0027458	0.0691821	1.16001	-0.251585	0.775842	False	False		4933422H20Rik	0.651421	0.186138	0.155937	0.0959713	0.964579	0.0156622	-0.0195587	0.000751237	False	False		Bcl11b	2.18127	-0.103399	4.20185	0.532268	0.113612	0.508504	False	False
AK1_-_130639906.23-P1P2|AK1_+_130639940.23-P1P2	AK1	0.812757	0.0900394	-0.109243	0.0228828	0.468753	0.329056	0.0963952	0.0843244	False	False		4933425L06Rik	0.803119	0.09522	0.188042	0.0592027	0.974446	0.0112421	-0.0649681	0.00179114	False	False		Bcl2	0.0470733	-0.00515117	0.00451746	0.0831888	-0.0211321	0.0147825	False	False
AK2_+_33502475.23-P1P2|AK2_+_33502042.23-P1P2	AK2	0.409996	0.38722	-0.264228	0.238024	0.657318	0.182225	-0.178597	0.0865187	False	False		4933426M11Rik	0.366602	0.435805	0.239688	0.34538	0.0915042	1.03856	-0.358158	0.912198	False	False		Bcl2a1b	0.294771	0.0313648	0.172242	0.614132	-0.178443	0.921512	False	False
AK3_-_4741156.23-P1P2|AK3_-_4741205.23-P1P2	AK3	0.257298	0.589563	0.404309	0.554534	0.612934	0.212587	-0.289996	0.163892	False	False		4933427D06Rik	0.234472	0.629908	-0.592233	1.23347	0.115668	0.936786	0.978437	2.2478	False	False		Bcl2a1d	0.0940309	0.0053661	0.00940033	0.254941	-0.0785339	0.168359	False	False
AK4_-_65613902.23-P1P2|AK4_+_65613321.23-P1P2	AK4	0.199017	0.70111	0.27376	0.446519	0.261721	0.582161	-0.265184	0.410411	False	False		4933427D14Rik	0.177375	0.751107	-0.317508	0.788521	0.714226	0.146164	-0.0817955	0.0293194	False	False		Bcl2l1	0.967152	-0.0615592	1.10918	0.290196	-0.0605662	0.147795	False	False
AK5_-_77747738.23-P1P2|AK5_-_77747887.23-P1P2	AK5	0.684396	0.164692	-0.116436	0.0446114	0.492338	0.307736	0.267034	0.218461	False	False		4933427G17Rik	0.57852	0.237682	-0.0667915	0.0524898	0.587067	0.231313	0.323452	0.183482	False	False		Bcl2l10	0.443749	-0.0561382	0.464099	0.488204	0.0798221	0.32769	False	False
AK7_+_96858485.23-P1P2|AK7_-_96858538.23-P1P2	AK7	0.485974	0.313387	-0.0899865	0.0656057	0.785312	0.104958	0.158782	0.0443043	False	False		4933430I17Rik	0.26964	0.569215	-0.330405	0.621844	0.38831	0.410821	0.506867	0.510659	False	False		Bcl2l11	0.238676	-0.0349122	0.155239	0.228663	0.0340498	0.0654712	False	False
AK8_+_135753659.23-P1P2|AK8_-_135753634.23-P1P2	AK8	0.465993	0.33162	-0.153821	0.11867	0.994319	0.00247417	-0.0388496	0.000255531	False	False		4933433C11Rik	0.959198	0.0180915	-0.142857	0.00854546	0.814096	0.0893245	-0.157711	0.0345476	False	False		Bcl2l12	0.206168	0.0352369	0.135342	0.161701	0.002714	0.00369029	False	False
AK9_+_110012406.23-P1P2|AK9_-_110012454.23-P1P2	AK9	0.630876	0.200056	0.124055	0.0577361	0.406659	0.39077	-0.307651	0.319601	False	False		4933434E20Rik	0.432216	0.364299	0.408519	0.492072	0.665954	0.176556	0.256752	0.111168	False	False		Bcl2l13	0.686108	-0.0677071	0.865446	0.490175	0.301806	1.24399	False	False
AKAP1_-_55162653.23-P1P2|AKAP1_-_55162661.23-P1P2	AKAP1	0.0585625	1.23238	0.466864	1.3385	0.340111	0.468379	-0.771362	0.96047	False	False		4933434I20Rik	0.357871	0.446273	0.455541	0.672181	0.361285	0.44215	-0.322515	0.349705	False	False		Bcl2l14	0.084315	-0.0488833	0.0767856	1.10328	0.15503	1.43827	False	False
AKAP10_+_19881078.23-P1P2|AKAP10_+_19881106.23-P1P2	AKAP10	0.909079	0.0413984	-0.1538	0.0148123	0.508267	0.293908	-0.53913	0.421243	False	False		4933436I01Rik	0.431372	0.365149	-0.133694	0.161413	0.755908	0.121531	0.0363086	0.0108213	False	False		Bcl2l2	0.608246	-0.0596552	0.675992	0.028396	0.0153127	0.00365635	False	False
AKAP11_+_42846479.23-P1P2|AKAP11_+_42846688.23-P1P2	AKAP11	0.00173636	2.76036	-2.41321	15.4969	0.584607	0.233136	-0.413628	0.256358	True	False		5031414D18Rik	0.529791	0.275895	-0.648824	0.591873	0.0619878	1.20769	-0.501279	1.48464	False	False		Bcl3	0.510589	-0.0908329	0.86403	0.109555	0.0247894	0.0228369	False	False
AKAP12_-_151561599.23-P1|AKAP12_-_151561609.23-P1	AKAP12	0.137307	0.862307	0.0634144	0.127213	0.535462	0.271271	0.140684	0.101456	False	False		5031439G07Rik	0.34044	0.467959	-0.120925	0.187104	0.342829	0.464923	-0.424055	0.483489	False	False		Bcl6	0.401802	-0.0618126	0.462704	0.0783003	0.00847451	0.00557977	False	False
AKAP12_+_151646850.23-P2|AKAP12_-_151646835.23-P2	AKAP12	0.0392552	1.4061	0.0813907	0.266241	0.585667	0.232349	0.0261431	0.0161483	False	False		5033411D12Rik	0.300464	0.522207	0.288139	0.497511	0.641792	0.192606	0.239656	0.113199	False	False		Bcl7a	0.187581	-0.0142126	0.0496679	0.27079	0.0312412	0.0711375	False	False
AKAP13_+_85923863.23-P1P2|AKAP13_+_85923876.23-P1P2	AKAP13	0.239314	0.621031	0.0380015	0.0549033	0.690046	0.161122	-0.161952	0.0693695	False	False		5330417C22Rik	0.862704	0.0641383	0.100645	0.0213436	0.577579	0.238388	-0.116918	0.0683517	False	False		Bcl7b	0.161237	-0.0249216	0.0748608	0.028396	0.00846112	0.00202033	False	False
AKAP14_+_119030185.23-P1P2|AKAP14_+_119030176.23-P1P2	AKAP14	0.582403	0.234776	-0.475379	0.259643	0.337551	0.47166	0.664287	0.832939	False	False		5430401F13Rik	0.378188	0.422292	-0.21917	0.306022	0.271008	0.567018	0.327382	0.455234	False	False		Bcl9	0.0272463	0.0168497	0.00855291	1.07533	-0.228776	2.06867	False	False
AKAP17A_+_1710540.23-P1P2|AKAP17A_-_1710549.23-P1P2	AKAP17A	0.0566055	1.24714	-1.38397	4.01538	0.119677	0.92199	-0.524194	1.28483	False	False		5430402E10Rik	0.37975	0.420502	0.177181	0.246344	0.922866	0.0348615	-0.0517104	0.00442088	False	False		Bclaf1	0.861281	-0.0732584	1.17548	1.11455	0.182305	1.70858	False	False
AKAP2_+_112811051.23-P1P2|AKAP2_+_112811196.23-P1P2	AKAP2	0.881362	0.0548459	-0.207201	0.0264375	0.823877	0.0841378	-0.119585	0.0267482	False	False		5430419D17Rik	0.234756	0.629383	0.226477	0.4713	0.638667	0.194725	-0.0691442	0.0330189	False	False		Bcmo1	0.237169	-0.095992	0.424139	0.666921	0.24721	1.38637	False	False
AKAP3_-_4754248.23-P2|AKAP3_-_4754290.23-P2	AKAP3	0.193371	0.713608	-0.655175	1.08768	0.0100268	1.99884	0.643911	3.42162	False	False		5430421N21Rik	0.424235	0.372394	-0.101249	0.124667	0.115331	0.938052	-0.514812	1.18429	False	False		Bcr	0.774994	0.0596802	0.861673	0.365001	0.0927369	0.284632	False	False
AKAP3_-_4758224.23-P1|AKAP3_-_4758021.23-P1	AKAP3	0.154779	0.810287	-0.921122	1.73636	0.146885	0.833021	-0.447604	0.991239	False	False		5430427O19Rik	0.422982	0.373678	-0.0988155	0.12209	0.198817	0.701546	0.391827	0.674116	False	False		Bdh1	0.717103	-0.0835019	1.11556	1.33544	0.248342	2.78877	False	False
AKAP4_+_49964995.23-P1P2|AKAP4_+_49964966.23-P1P2	AKAP4	0.907948	0.0419392	-0.228613	0.0223051	0.702079	0.153614	0.117705	0.0480678	False	False		5430435G22Rik	0.313773	0.503385	-0.327938	0.545819	0.0429103	1.36744	0.98899	3.31653	False	False		Bdkrb2	0.340931	0.0279553	0.177559	0.370312	0.0559521	0.17423	False	False
AKAP5_+_64932289.23-P1P2|AKAP5_-_64932236.23-P1P2	AKAP5	0.726373	0.13884	-0.0700032	0.0226108	0.917842	0.037232	0.0376574	0.00372731	False	False		5530400C23Rik	0.889966	0.0506264	0.0438638	0.00734244	0.0975317	1.01085	-0.443493	1.09941	False	False		Bdnf	0.351114	-0.0716421	0.46863	0.217011	0.0431512	0.078743	False	False
AKAP6_-_32798545.23-P1P2|AKAP6_+_32798551.23-P1P2	AKAP6	0.124997	0.9031	0.209881	0.440952	0.757002	0.120903	-0.18576	0.0597057	False	False		5730409E04Rik	0.659227	0.180965	-0.575273	0.344211	0.841892	0.0747434	-0.173473	0.0317972	False	False		Begain	0.827238	0.0579116	0.892504	0.397279	-0.147939	0.494216	False	False
AKAP7_+_131456600.23-P1P2|AKAP7_-_131456599.23-P1P2	AKAP7	0.592689	0.227173	-0.00992076	0.00524307	0.958894	0.0182293	-0.0690785	0.00334766	False	False		5730455P16Rik	0.0653025	1.18507	-0.573955	2.24895	0.759231	0.119626	-0.246924	0.072439	False	False		Bhmt	0.180554	0.00807085	0.0271482	0.123841	0.0119783	0.0124737	False	False
AKAP8_+_15490555.23-P1P2|AKAP8_+_15490566.23-P1P2	AKAP8	0.339878	0.468678	-0.346985	0.378328	0.0657456	1.18213	0.275593	0.86609	False	False		5730507C01Rik	0.514335	0.288754	-0.306386	0.29252	0.955877	0.0195981	-0.100206	0.00481606	False	False		Bhmt2	1.13939	0.0850116	1.80454	0.365001	-0.145034	0.445146	False	False
AKAP8L_-_15529435.23-P1P2|AKAP8L_-_15529375.23-P1P2	AKAP8L	0.0133311	1.87513	-1.08972	4.75368	0.482769	0.316261	0.215359	0.181066	False	False		5730508B09Rik	0.146724	0.833498	-0.144584	0.398459	0.434287	0.362224	-0.251048	0.223006	False	False		Bid	0.255432	-0.0417502	0.198677	0.747237	-0.13684	0.859825	False	False
AKAP9_+_91570225.23-P1P2|AKAP9_+_91570248.23-P1P2	AKAP9	0.71507	0.145651	-0.096229	0.0326065	0.363265	0.439776	0.178285	0.208437	False	False		5730559C18Rik	0.345206	0.461921	-0.339344	0.518282	0.0275475	1.55992	1.23758	4.73435	False	False		Bik	0.0783256	0.0265068	0.038679	0.237842	-0.00520403	0.010408	False	False
AKIP1_-_8932793.23-P1P2|AKIP1_-_8932799.23-P1P2	AKIP1	0.177368	0.751124	0.190351	0.332621	0.181903	0.74016	0.367061	0.722259	False	False		5830403L16Rik	0.534995	0.27165	0.0737013	0.0661976	0.506262	0.295624	-0.203897	0.14782	False	False		Bin1	0.18617	0.0168781	0.0585394	0.0328365	-0.0679023	0.0187491	False	False
AKIRIN1_+_39456935.23-P1P2|AKIRIN1_-_39457004.23-P1P2	AKIRIN1	0.0656903	1.1825	-1.62867	4.4804	0.768828	0.114171	0.150582	0.0457043	False	False		5830411N06Rik	0.502324	0.299016	0.172028	0.170079	0.883087	0.0539965	-0.200345	0.0265295	False	False		Bin3	0.00306089	-0.00140206	7.99517e-05	0.101901	-0.0343241	0.0294114	False	False
AKIRIN2_-_88411464.23-P1P2|AKIRIN2_+_88411936.23-P1P2	AKIRIN2	0.00702963	2.15307	-4.01544	20.1129	0.939791	0.0269688	0.0688363	0.00493523	True	False		5830415F09Rik	0.512013	0.290719	0.243552	0.234112	0.834497	0.0785752	0.0462847	0.00891881	False	False		Birc3	0.301228	0.0363853	0.204191	0.894246	-0.117287	0.88195	False	False
AKNA_+_117150220.23-P1|AKNA_+_117150244.23-P1	AKNA	0.234504	0.629851	0.161763	0.237028	0.239287	0.621081	0.274354	0.452989	False	False		5830418K08Rik	0.896234	0.0475787	-0.00428165	0.000673569	0.44506	0.351582	0.065024	0.056064	False	False		Birc5	2.93036	-0.376066	20.5305	0.180966	0.207675	0.316024	True	False
AKNA_+_117160706.23-P2|AKNA_+_117160729.23-P2	AKNA	0.377248	0.423373	-0.478115	0.470912	0.313535	0.503714	0.319784	0.428223	False	False		5830473C10Rik	0.0393231	1.40535	-1.43594	6.67236	0.966557	0.0147727	0.0564401	0.00204471	False	False		Birc6	0.0304955	0.0418557	0.0237796	0.137114	-0.116026	0.133776	False	False
AKNAD1_+_109399657.23-ENST00000370001.3|AKNAD1_+_109399646.23-ENST00000370001.3	AKNAD1	0.151796	0.818739	0.368678	0.702224	0.857987	0.0665194	-0.139578	0.0246827	False	False		6030419C18Rik	0.468084	0.329676	-0.0585379	0.063809	0.874475	0.0582527	0.119739	0.0171055	False	False		Bivm	0.961983	0.0714033	1.27967	0.819259	-0.0912681	0.628751	False	False
AKR1A1_+_46016701.23-P1P2|AKR1A1_-_46016592.23-P1P2	AKR1A1	0.0580303	1.23635	-1.80078	5.17946	0.99777	0.000969749	-0.03593	9.26285e-05	False	False		6030458C11Rik	0.000597542	3.22363	-1.33991	14.2817	0.691542	0.160181	0.0686469	0.026966	True	False		Blk	0.661893	0.0507616	0.625946	0.571548	-0.133886	0.643468	False	False
AKR1B1_+_134143839.23-P1P2|AKR1B1_-_134143848.23-P1P2	AKR1B1	0.792044	0.101251	-0.103774	0.024444	0.544134	0.264294	-0.217972	0.15315	False	False		6030468B19Rik	0.423399	0.37325	-0.096415	0.118988	0.235079	0.628786	-0.68353	1.05401	False	False		Blm	2.16973	-0.112785	4.55902	0.871437	0.267104	1.95729	False	False
AKR1B10_+_134212317.23-P1P2|AKR1B10_+_134212298.23-P1P2	AKR1B10	0.4468	0.349887	0.0244035	0.0198639	0.575448	0.239994	0.096778	0.0617455	False	False		6030498E09Rik	0.859873	0.0655658	0.0675257	0.0146387	0.314366	0.502564	-0.433079	0.533756	False	False		Blnk	0.169451	0.00820269	0.025895	1.0286	-0.180359	1.56	False	False
AKR1B15_+_134234041.23-P1P2|AKR1B15_-_134233853.23-P1P2	AKR1B15	0.2252	0.647431	0.419336	0.631595	0.0684273	1.16477	-0.698319	2.16233	False	False		6330403A02Rik	0.505083	0.296638	-0.45138	0.442717	0.416949	0.379917	0.578917	0.539372	False	False		Bloc1s2	0.646678	0.0526297	0.634063	0.415638	-0.115852	0.404909	False	False
AKR1C1_+_5005615.23-P1P2|AKR1C1_+_5005619.23-P1P2	AKR1C1	0.298951	0.5244	0.162475	0.198213	0.251821	0.598908	0.36915	0.587747	False	False		6330408A02Rik	0.439856	0.356689	-0.2277	0.268541	0.530305	0.275474	0.192005	0.129711	False	False		Bloc1s3	0.188994	0.0260321	0.0916584	0.455189	-0.225136	0.861736	False	False
AKR1C2_-_5046012.23-P1|AKR1C2_+_5046039.23-P1	AKR1C2	0.0727036	1.13844	0.197088	0.521981	0.21161	0.674464	0.19104	0.342539	False	False		6330409D20Rik	0.735951	0.133151	-0.180875	0.0796307	0.710969	0.148149	-0.181265	0.0658561	False	False		Blvra	0.384047	-0.0384035	0.27477	2.00717	0.242652	4.09549	False	False
AKR1C2_-_5060075.23-P2|AKR1C2_+_5059865.23-P2	AKR1C2	0.6892	0.161655	-0.0202661	0.00762155	0.320628	0.493999	0.130817	0.171798	False	False		6330416G13Rik	0.704144	0.152339	-0.0443674	0.0223477	0.485534	0.31378	0.236863	0.182266	False	False		Blvrb	0.107659	0.0259703	0.0520884	0.0591687	0.0147099	0.00731878	False	False
AKR1C3_-_5136634.23-P1P2|AKR1C3_-_5136639.23-P1P2	AKR1C3	0.187286	0.727494	0.182812	0.309398	0.698289	0.155965	-0.11014	0.0456668	False	False		6430531B16Rik	0.512477	0.290325	0.332398	0.319081	0.291814	0.534894	0.202337	0.265416	False	False		Bmf	0.493053	0.0454738	0.417704	0.961654	-0.185172	1.49738	False	False
AKR1C4_+_5239007.23-P1P2|AKR1C4_-_5239039.23-P1P2	AKR1C4	0.970162	0.0131559	-0.20426	0.00625155	0.97847	0.00945238	-0.0254891	0.000640508	False	False		6430548M08Rik	0.444564	0.352066	-0.579618	0.674721	0.99303	0.00303775	-0.172136	0.00128235	False	False		Bmp2	0.0795184	0.0197206	0.0292147	0.778084	-0.144878	0.947913	False	False
AKR1D1_+_137761243.23-P1P2|AKR1D1_+_137761259.23-P1P2	AKR1D1	0.546126	0.262707	-0.0991808	0.0606155	0.460098	0.33715	0.169315	0.151756	False	False		6430550D23Rik	0.0199826	1.69935	0.512678	2.88061	0.0434367	1.36214	-0.801864	2.6786	False	False		Bmp2k	0.329181	0.0304699	0.186861	0.345307	-0.0385373	0.111899	False	False
AKR1E2_+_4868442.23-P1P2|AKR1E2_+_4868462.23-P1P2	AKR1E2	0.174709	0.757685	0.198616	0.350096	0.539726	0.267826	0.0362106	0.025782	False	False		6430571L13Rik	0.74684	0.126772	-0.124337	0.0521173	0.262854	0.580286	0.574299	0.817267	False	False		Bmp4	0.401802	-0.0275987	0.206592	0.500072	0.107323	0.451298	False	False
AKR7A2_-_19638583.23-P1P2|AKR7A2_-_19638512.23-P1P2	AKR7A2	0.343478	0.464102	-0.361856	0.39069	0.303414	0.517964	0.425801	0.58632	False	False		6430573F11Rik	0.314119	0.502906	0.117753	0.195801	0.240286	0.619272	-0.587015	0.891484	False	False		Bmp7	0.403593	-0.0206834	0.155518	1.09206	0.318474	2.92454	False	False
AKR7A3_+_19615549.23-P1P2|AKR7A3_-_19614864.23-P1P2	AKR7A3	0.44871	0.348034	-0.514955	0.416941	0.875549	0.0577193	0.0595834	0.00914271	False	False		6720489N17Rik	0.250735	0.600785	0.379596	0.754046	0.61544	0.210814	-0.133199	0.0688626	False	False		Bmpr1a	0.128042	0.0246351	0.058765	0.123841	-0.0471296	0.049079	False	False
AKT1_+_105261633.23-P1P2|AKT1_+_105262011.23-P1P2	AKT1	0.768432	0.114395	-0.215991	0.057481	0.184794	0.733313	0.234031	0.456237	False	False		6820408C15Rik	0.168741	0.77278	0.420768	1.07512	0.201117	0.696552	-0.606335	1.03574	False	False		Bmpr1b	0.699474	0.0427536	0.557132	0.56527	-0.112227	0.533449	False	False
AKT1S1_+_50379848.23-P1P2|AKT1S1_+_50379851.23-P1P2	AKT1S1	0.780492	0.107631	-0.233692	0.0585149	0.746318	0.127076	0.0344163	0.0116267	False	False		7420426K07Rik	0.844053	0.0736302	-0.0401866	0.00978352	0.57113	0.243265	-0.182805	0.109057	False	False		Bmpr2	1.05162	0.130354	2.55384	0.00469778	0.0951791	0.00375987	False	False
AKT2_+_40791298.23-P1P2|AKT2_-_40791096.23-P1P2	AKT2	0.484201	0.314974	-0.106739	0.0782136	0.344199	0.46319	-0.465386	0.57306	False	False		7420461P10Rik	0.177375	0.751107	0.439314	1.09102	0.325344	0.487657	-0.184008	0.220057	False	False		Bmx	0.297994	-0.0479274	0.266075	0.188633	0.0291242	0.0461966	False	False
AKT3_-_244013539.23-P1P2|AKT3_-_244013349.23-P1P2	AKT3	0.657796	0.181909	-0.261686	0.110743	0.677644	0.168998	0.0093803	0.00421432	False	False		7530416G11Rik	0.196622	0.706368	0.36174	0.844862	0.334377	0.475763	-0.561849	0.655532	False	False		Bnip1	0.655353	-0.0630016	0.769203	0.0429776	-0.0249991	0.00903453	False	False
AKTIP_+_53537096.23-P1P2|AKTIP_+_53536913.23-P1P2	AKTIP	0.0323778	1.48975	0.00391319	0.0135621	0.760837	0.118708	-0.0269533	0.00850591	False	False		8030411F24Rik	0.455803	0.341223	0.130727	0.147489	0.723481	0.140573	-0.227606	0.0784638	False	False		Bnip2	0.0940309	0.0221848	0.0388634	0.927668	-0.137921	1.07587	False	False
ALAD_+_116163528.23-P1P2|ALAD_-_116163505.23-P1P2	ALAD	0.0832442	1.07965	-0.566854	1.42376	0.0303934	1.51722	-0.649955	2.62156	False	False		8030423J24Rik	0.688163	0.162309	-0.0373427	0.0200403	0.909003	0.0414349	0.0886687	0.00900991	False	False		Bnip3	0.0574672	-0.00531201	0.00568712	0.894592	0.132298	0.995215	False	False
ALAS1_+_52232365.23-P1P2|ALAS1_-_52232170.23-P1P2	ALAS1	0.0221614	1.6544	-4.39814	16.9275	0.17193	0.764649	-4.83803	9.83465	True	False		8030462N17Rik	0.150574	0.822251	-0.511783	1.39139	0.325702	0.487179	-0.456727	0.545668	False	False		Bnip3l	0.475759	-0.0290333	0.257333	0.561101	-0.0485175	0.228917	False	False
ALAS2_-_55057349.23-P1P2|ALAS2_+_55057338.23-P1P2	ALAS2	0.513974	0.289059	0.260071	0.174889	0.796085	0.0990403	0.158246	0.0416651	False	False		8430408G22Rik	0.338619	0.470289	-0.324902	0.505213	0.588571	0.230201	0.526564	0.297264	False	False		Bod1	0.640203	-0.079705	0.950642	0.0662641	-0.0340318	0.0189628	False	False
ALB_-_74270053.23-P1|ALB_+_74270025.23-P1	ALB	0.124751	0.903955	0.194099	0.408181	0.676214	0.169916	0.174035	0.0786137	False	False		8430419L09Rik	0.831852	0.0799537	0.012165	0.00321594	0.441928	0.354648	-0.191459	0.166517	False	False		Bok	0.749443	-0.0813118	1.13529	0.296758	0.0110023	0.0274552	False	False
ALB_+_74275112.23-P2|ALB_+_74275099.23-P2	ALB	0.345202	0.461927	0.245409	0.263722	0.282217	0.549417	0.0994707	0.145287	False	False		8430427H17Rik	0.698268	0.155978	0.0388433	0.0200325	0.247652	0.606159	-0.415101	0.617055	False	False		Bora	0.612467	-0.158391	1.80728	3.03432	-0.444111	11.3316	False	True
ALCAM_+_105085800.23-P1P2|ALCAM_+_105085743.23-P1P2	ALCAM	0.460663	0.336617	-0.154309	0.12084	0.0517924	1.28573	0.372686	1.27386	False	False		9030025P20Rik	0.244839	0.61112	0.347722	0.702612	0.42832	0.368232	-0.24546	0.221659	False	False		Bpgm	0.0283269	0.0337361	0.0178036	0.575749	-0.127046	0.615084	False	False
ALDH16A1_+_49956535.23-P1P2|ALDH16A1_-_49956532.23-P1P2	ALDH16A1	0.667049	0.175842	-0.444736	0.181932	0.457122	0.339967	-0.621668	0.561855	False	False		9030617O03Rik	0.425908	0.370685	-0.0434968	0.0533113	0.417367	0.379482	-0.452477	0.421086	False	False		Bphl	0.670655	-0.0362948	0.453479	1.17462	0.155778	1.53865	False	False
ALDH18A1_+_97416133.23-P1P2|ALDH18A1_+_97416448.23-P1P2	ALDH18A1	0.320785	0.493785	-0.637274	0.732062	0.594353	0.225956	0.146433	0.0879611	False	False		9030619P08Rik	0.341902	0.466098	0.151861	0.234035	0.568659	0.245148	-0.221047	0.132892	False	False		Bpi	0.829649	-0.0598182	0.924575	0.863894	-0.169885	1.23411	False	False
ALDH1A1_-_75567941.23-P1P2|ALDH1A1_-_75567897.23-P1P2	ALDH1A1	0.781868	0.106867	-0.144142	0.0358358	0.229505	0.639209	-0.442777	0.752412	False	False		9030624G23Rik	0.600387	0.221569	-0.279813	0.204991	0.909003	0.0414349	0.387681	0.0393935	False	False		Braf	0.024019	-0.0124309	0.00556251	0.295113	0.0669787	0.166212	False	False
ALDH1A2_-_58357877.23-P1P2|ALDH1A2_+_58357872.23-P1P2	ALDH1A2	0.0346211	1.46066	-0.796581	2.70684	0.00795682	2.09926	0.529392	2.95442	False	False		9030624J02Rik	0.00118486	2.92633	-0.687726	6.65422	0.782614	0.106452	-0.210416	0.0549309	False	False		Brat1	0.01552	-0.00983999	0.00284511	1.03133	-0.161697	1.40229	False	False
ALDH1A3_-_101419689.23-P1|ALDH1A3_-_101419642.23-P1	ALDH1A3	0.0523411	1.28116	-1.32378	3.94549	0.142824	0.8452	-1.22039	2.74213	False	False		9130008F23Rik	0.861005	0.0649944	-0.280251	0.0602255	0.439008	0.357528	-0.44846	0.393204	False	False		Brca1	0.0964855	0.0114905	0.0206545	1.05322	-0.23137	2.04911	False	False
ALDH1A3_+_101438401.23-P2|ALDH1A3_-_101438643.23-P2	ALDH1A3	0.169726	0.770251	0.279169	0.500245	0.863288	0.0638442	-0.111151	0.0188653	False	False		9130011E15Rik	0.0016555	2.78107	-1.58134	14.541	0.0125744	1.90051	1.58637	7.39367	True	False		Brca2	2.25113	-0.191437	8.02858	2.99623	-0.886825	22.3435	True	True
ALDH1B1_+_38392764.23-P1P2|ALDH1B1_+_38392957.23-P1P2	ALDH1B1	0.120718	0.918228	0.572737	1.22346	0.370837	0.430817	-0.257588	0.295017	False	False		9130019O22Rik	0.450596	0.346213	-0.210361	0.240806	0.87964	0.0556948	-0.0790777	0.0108007	False	False		Brcc3	0.201838	0.0330726	0.124361	0.0487018	-0.0200938	0.00822897	False	False
ALDH1L1_-_125899391.23-P1P2|ALDH1L1_-_125899333.23-P1P2	ALDH1L1	0.447161	0.349536	-0.0978657	0.0795805	0.189245	0.722976	-0.344681	0.662474	False	False		9130023H24Rik	0.0152011	1.81813	-0.779047	4.68322	0.801126	0.096299	0.318509	0.075219	False	False		Brd1	0.655353	-0.0570457	0.696486	1.34219	-0.259261	2.92611	False	False
ALDH1L2_-_105478237.23-P1P2|ALDH1L2_+_105477985.23-P1P2	ALDH1L2	0.408019	0.389319	0.122659	0.111094	0.0327869	1.4843	-0.735228	2.90116	False	False		9130204L05Rik	0.89901	0.0462356	0.00466803	0.000713622	0.83141	0.0801849	-0.115794	0.0227699	False	False		Brd2	0.71521	-0.0844683	1.12549	1.12304	0.140977	1.33132	False	False
ALDH2_+_112204799.23-P1P2|ALDH2_+_112204778.23-P1P2	ALDH2	0.169774	0.770129	0.0177579	0.0318156	0.249676	0.602623	0.100969	0.161757	False	False		9130401M01Rik	0.372367	0.429029	0.252751	0.358539	0.197548	0.704327	-0.563832	0.973886	False	False		Brd3	0.635902	-0.036041	0.426973	0.291832	-0.104087	0.255426	False	False
ALDH3A1_+_19651582.23-P1P2|ALDH3A1_-_19651612.23-P1P2	ALDH3A1	0.0424904	1.37171	-1.25969	4.01985	0.726548	0.138736	0.0706253	0.0260482	False	False		9130409I23Rik	0.647792	0.188565	-0.0708938	0.0442004	0.204732	0.688814	-0.396397	0.669602	False	False		Brd4	0.312638	-0.0611503	0.356168	0.1425	-0.0558904	0.0669718	False	False
ALDH3A2_-_19552119.23-P1P2|ALDH3A2_+_19552078.23-P1P2	ALDH3A2	0.528942	0.276592	-0.382632	0.246209	0.346781	0.459944	0.327826	0.400845	False	False		9230104L09Rik	0.568216	0.245486	-0.0270522	0.0219578	0.998257	0.000757458	0.0194985	3.62196e-05	False	False		Brdt	0.832064	0.0678079	1.05112	0.318414	-0.0383999	0.102816	False	False
ALDH3B1_+_67777809.23-P1P2|ALDH3B1_+_67777830.23-P1P2	ALDH3B1	0.202953	0.692605	-0.699753	1.12749	0.645354	0.190202	0.297319	0.150337	False	False		9230110C19Rik	0.187297	0.727469	-1.27016	3.05512	0.260687	0.58388	1.06869	1.53024	False	False		Bre	1.28917	0.0804894	1.93314	0.0131742	-0.0938518	0.010397	False	False
ALDH3B2_+_67442058.23-P1P2|ALDH3B2_+_67442070.23-P1P2	ALDH3B2	0.109095	0.962197	-0.00345072	0.00772427	0.482529	0.316477	-0.416995	0.350834	False	False		9230110F15Rik	0.196372	0.70692	0.255266	0.596652	0.0972376	1.01217	0.240824	0.59777	False	False		Brinp2	0.414404	-0.0369219	0.285051	0.83649	0.251613	1.76983	False	False
ALDH4A1_-_19228972.23-P1P2|ALDH4A1_-_19229032.23-P1P2	ALDH4A1	0.243907	0.612776	0.0882977	0.125874	0.654879	0.183839	-0.236307	0.11549	False	False		9230112D13Rik	0.350015	0.455914	0.261763	0.394592	0.385912	0.413511	0.140281	0.142256	False	False		Brinp3	1.31001	-0.144102	3.51689	0.390889	0.00961077	0.03159	False	False
ALDH5A1_+_24495207.23-P1P2|ALDH5A1_+_24495537.23-P1P2	ALDH5A1	0.287555	0.541279	0.178629	0.224935	0.573945	0.241129	-0.254735	0.163293	False	False		9330159F19Rik	0.0513692	1.2893	0.287495	1.22558	0.165044	0.7824	0.454483	0.872027	False	False		Brip1	0.895946	-0.127866	2.13427	0.534307	0.0879936	0.395349	False	False
ALDH6A1_+_74551093.23-P1P2|ALDH6A1_+_74551090.23-P1P2	ALDH6A1	0.134358	0.871738	-0.434985	0.882153	0.45507	0.341921	-0.235906	0.214434	False	False		9330182L06Rik	0.137145	0.862819	-0.874781	2.49561	0.824282	0.0839244	0.196036	0.0403467	False	False		Brms1	0.172211	0.0299306	0.0960262	0.876483	0.227452	1.67638	False	False
ALDH7A1_+_125930884.23-P1P2|ALDH7A1_-_125930901.23-P1P2	ALDH7A1	0.673643	0.17157	-0.121821	0.0486235	0.292784	0.533452	0.4568	0.647814	False	False		9330182O14Rik	0.775384	0.110483	-0.0666973	0.0243648	0.908425	0.0417107	-0.104902	0.0107304	False	False		Brsk1	0.289957	0.0255732	0.138144	0.0272922	-0.00136187	0.000312546	False	False
ALDH8A1_+_135271208.23-P1P2|ALDH8A1_-_135271197.23-P1P2	ALDH8A1	0.144483	0.840183	-0.663263	1.29641	0.534065	0.272406	0.298741	0.216341	False	False		9430007A20Rik	0.226904	0.644157	-0.303851	0.647158	0.787651	0.103666	-0.13199	0.0335554	False	False		Brsk2	0.187581	0.018515	0.0647032	0.0498543	0.0247093	0.0103586	False	False
ALDH9A1_-_165667740.23-P1P2|ALDH9A1_-_165667800.23-P1P2	ALDH9A1	0.720234	0.142526	-0.263847	0.0874844	0.219553	0.658461	0.469026	0.821023	False	False		9430015G10Rik	0.727278	0.1383	-0.0453791	0.0207508	0.0081378	2.08949	-1.13073	5.79407	False	False		Bsg	0.052723	0.00888231	0.00872448	0.191527	-0.111036	0.178827	False	False
ALDOA_+_30077139.23-P1P2|ALDOA_+_30077177.23-P1P2	ALDOA	0.0113296	1.94579	-2.31066	10.4596	0.0244955	1.61091	-2.19172	9.38612	True	False		9430016H08Rik	0.156807	0.804634	-0.529986	1.41	0.400026	0.397911	0.213447	0.208286	False	False		Bst1	0.253894	-0.0499114	0.236084	0.201746	0.147784	0.25071	False	False
ALDOB_-_104187759.23-P2|ALDOB_-_104187762.23-P2	ALDOB	0.392748	0.405886	-0.423512	0.399902	0.499626	0.301355	0.029806	0.0238787	False	False		9430020K01Rik	0.00551032	2.25882	-0.715457	5.34347	0.294488	0.530933	-0.557325	0.725658	False	False		Btg1	0.530359	-0.0530948	0.52461	0.0615234	0.0700047	0.0362164	False	False
ALDOB_-_104197973.23-P1|ALDOB_-_104198032.23-P1	ALDOB	0.213493	0.670617	0.153606	0.239644	0.722471	0.141179	-0.132783	0.0498359	False	False		9430023L20Rik	0.969537	0.0134358	-0.0222689	0.000989281	0.644923	0.190492	-0.55552	0.259514	False	False		Btg2	0.784224	-0.0472486	0.690308	0.217011	-0.0727768	0.132804	False	False
ALDOC_+_26903892.23-P1P2|ALDOC_-_26903885.23-P1P2	ALDOC	0.249631	0.602702	0.265807	0.372695	0.191239	0.718424	-0.737373	1.4083	False	False		9430038I01Rik	0.415514	0.381414	0.283556	0.357597	0.680836	0.166958	-0.175468	0.0718436	False	False		Btg3	1.07869	0.0198413	0.398731	1.21256	-0.223192	2.27573	False	False
ALG1_+_5122098.23-P1P2|ALG1_+_5121857.23-P1P2	ALG1	0.132174	0.878854	-5.96564	12.1971	0.364044	0.438846	-2.70129	3.15146	True	False		9430069I07Rik	0.951162	0.0217454	0.0291016	0.00209238	0.174088	0.759232	-0.633921	1.1803	False	False		Btg4	0.336273	-0.0389626	0.244093	0.127126	-0.0559719	0.0598331	False	False
ALG10_+_34175434.23-P1P2|ALG10_+_34175364.23-P1P2	ALG10	0.290626	0.536665	0.331677	0.414097	0.503396	0.29809	-0.393336	0.311702	False	False		9530002B09Rik	0.818203	0.0871391	-0.0498118	0.0143517	0.933857	0.0297194	0.0340961	0.00248501	False	False		Btk	0.964566	0.08098	1.4552	0.546607	0.0489458	0.224972	False	False
ALG10B_+_38710525.23-P1P2|ALG10B_+_38710933.23-P1P2	ALG10B	0.365552	0.437051	0.0565853	0.0575333	0.78921	0.102807	0.0108665	0.0029699	False	False		9530003J23Rik	0.0105941	1.97494	-0.645661	4.21614	0.0105158	1.97816	0.658207	3.19306	False	False		Bub1	1.63552	-0.227439	6.93004	0.116008	0.0954783	0.0931386	False	False
ALG12_+_50312054.23-P1P2|ALG12_-_50312053.23-P1P2	ALG12	0.508235	0.293935	-0.311434	0.212961	0.233644	0.631445	0.125823	0.211214	False	False		9530053A07Rik	0.495919	0.304589	0.0738883	0.0744128	0.49423	0.306071	0.289526	0.217317	False	False		Bub1b	3.91653	-0.591649	43.1697	0.629235	0.0719878	0.380899	True	False
ALG13_+_110924898.23-P1P2|ALG13_+_110924465.23-P1P2	ALG13	0.0219093	1.65937	-5.55989	21.4631	0.88592	0.0526053	-0.183516	0.0256644	True	False		9530068E07Rik	0.0398071	1.40004	-1.31281	6.07713	0.690251	0.160993	0.294977	0.11646	False	False		Bub3	3.76228	-0.531354	37.2434	0.191631	0.0603679	0.0972769	True	False
ALG14_+_95538155.23-P1P2|ALG14_+_95538302.23-P1P2	ALG14	0.00260473	2.58424	-3.43094	20.6267	0.716917	0.144531	-0.195149	0.0749819	True	False		9530077C05Rik	0.433484	0.363027	-0.249901	0.299961	0.859583	0.0657123	-0.101265	0.0163189	False	False		C1qa	0.131938	-0.013573	0.0333626	1.05873	0.12679	1.12878	False	False
ALG1L_-_125655482.23-ENST00000340333.3|ALG1L_-_125655452.23-ENST00000340333.3	ALG1L	0.300437	0.522247	0.121977	0.148197	0.144936	0.838823	-0.797285	1.77792	False	False		9630033F20Rik	0.449299	0.347464	-0.396061	0.455019	0.353678	0.451392	1.25378	1.3879	False	False		C1qb	0.0493257	0.0147095	0.0135172	0.0295023	-0.0126212	0.00313108	False	False
ALG2_-_101984133.23-P1P2|ALG2_+_101984159.23-P1P2	ALG2	0.0242509	1.61527	-4.23486	15.9136	0.858096	0.0664642	0.218526	0.0386116	True	False		9830107B12Rik	0.818763	0.086842	0.0403756	0.0115933	0.913043	0.0395086	-0.182215	0.0176547	False	False		C1qc	0.052723	-0.0642605	0.0631186	0.372089	0.258589	0.809086	False	False
ALG3_-_183966701.23-P1P2|ALG3_+_183966721.23-P1P2	ALG3	0.385121	0.414403	0.05694	0.0548938	0.0927095	1.03288	-0.720736	1.97903	False	False		9830147E19Rik	0.237606	0.624142	0.264333	0.545497	0.161964	0.790583	0.622417	1.20674	False	False		C1ql1	0.142444	-0.0470292	0.124803	1.34838	0.244731	2.77484	False	False
ALG5_+_37573440.23-P1P2|ALG5_-_37573057.23-P1P2	ALG5	0.629339	0.201116	-0.330875	0.154808	0.0505753	1.29606	0.476056	1.64026	False	False		9930012K11Rik	0.612976	0.212557	0.15747	0.11067	0.691542	0.160181	-0.332043	0.130434	False	False		C1qtnf9	0.00821016	-0.019518	0.00298539	0.436186	-0.175021	0.641949	False	False
ALG6_+_63833373.23-P1P2|ALG6_-_63833380.23-P1P2	ALG6	0.000631456	3.19966	-1.07196	7.97928	0.981206	0.00823962	-0.0229565	0.000502853	False	False		9930013L23Rik	0.842362	0.0745013	-0.295878	0.0728843	0.396368	0.401902	-0.200715	0.197826	False	False		C1ra	0.822426	0.041557	0.636729	1.03951	-0.105468	0.921907	False	False
ALG8_+_77850627.23-P1P2|ALG8_-_77850641.23-P1P2	ALG8	0.45462	0.342351	-0.378093	0.30113	0.329682	0.481905	0.551489	0.706522	False	False		9930021J03Rik	0.24748	0.60646	-0.675928	1.35538	0.176872	0.752341	-0.478541	0.882913	False	False		C1rb	0.235666	-0.0246122	0.108059	0.484274	0.0720013	0.293204	False	False
ALG9_-_111742019.23-P1P2|ALG9_+_111742236.23-P1P2	ALG9	0.601014	0.221115	-0.36586	0.188199	0.509054	0.293236	0.344589	0.268625	False	False		9930111J21Rik1	0.640531	0.19346	0.125601	0.0803419	0.645822	0.189887	0.115592	0.053828	False	False		C1s	0.115224	0.064553	0.138572	0.350969	-0.197668	0.58337	False	False
ALK_+_30144436.23-P1P2|ALK_-_30144395.23-P1P2	ALK	0.62485	0.204225	-0.0671522	0.0319045	0.841239	0.0750808	0.0369555	0.00737626	False	False		9930111J21Rik2	0.640531	0.19346	0.125601	0.0803419	0.645822	0.189887	0.115592	0.053828	False	False		C230052I12Rik	0.309364	0.0443279	0.255482	0.504052	-0.0395659	0.167701	False	False
ALKBH1_+_78174341.23-P1P2|ALKBH1_-_78174295.23-P1P2	ALKBH1	0.0231938	1.63463	-1.77416	6.74678	0.160956	0.793294	0.493173	1.04007	False	False		A130010J15Rik	0.489557	0.310196	-0.461602	0.473437	0.469736	0.328146	-0.492102	0.39601	False	False		C230081A13Rik	0.747138	-0.0771825	1.07432	0.466739	0.10479	0.411274	False	False
ALKBH2_+_109531250.23-P1P2|ALKBH2_+_109531240.23-P1P2	ALKBH2	0.475063	0.323249	0.121082	0.0910541	0.300608	0.522	-0.412167	0.571968	False	False		A1bg	0.357118	0.447188	-0.239203	0.353683	0.108119	0.9661	0.680267	1.6117	False	False		C2cd4b	0.346009	0.0478945	0.308736	0.574667	0.0168573	0.0814598	False	False
ALKBH3_-_43902421.23-P1P2|ALKBH3_+_43902434.23-P1P2	ALKBH3	0.237469	0.624393	-0.0680436	0.0988392	0.922145	0.0352007	-0.00809593	0.00075761	False	False		A1cf	0.135817	0.867046	-0.763668	2.18929	0.122197	0.912939	-0.423944	0.949148	False	False		C3	0.524397	-0.0627829	0.613359	0.730856	0.141934	0.87228	False	False
ALKBH4_-_102105260.23-P1P2|ALKBH4_-_102105269.23-P1P2	ALKBH4	0.478422	0.320189	-0.359876	0.268067	0.94957	0.0224732	-0.0697014	0.00416423	False	False		A230046K03Rik	0.0818341	1.08707	-0.481945	1.73225	0.258227	0.587999	0.665955	0.960296	False	False		C4b	0.407185	0.0289557	0.219654	0.607663	0.183884	0.939606	False	False
ALKBH5_-_18087161.23-P1P2|ALKBH5_-_18087178.23-P1P2	ALKBH5	0.416907	0.379961	-0.00591101	0.00522498	0.280927	0.551407	-0.469434	0.688137	False	False		A230050P20Rik	0.534995	0.27165	-0.537505	0.48278	0.619542	0.207929	-0.271367	0.138375	False	False		C7	0.107659	-0.0388678	0.0779566	1.01505	-0.129959	1.10925	False	False
ALKBH6_+_36505031.23-P1P2|ALKBH6_+_36505140.23-P1P2	ALKBH6	0.446723	0.349962	0.204252	0.166291	0.290123	0.537418	0.327887	0.468452	False	False		A230065H16Rik	0.138483	0.858602	-0.546314	1.55093	0.638667	0.194725	0.121247	0.0579001	False	False		C77370	1.03286	-0.0625239	1.2031	0.160311	0.0199793	0.0269328	False	False
ALKBH7_+_6372803.23-P1P2|ALKBH7_+_6372823.23-P1P2	ALKBH7	0.337454	0.471785	-0.0305681	0.0335503	0.665751	0.176688	0.0880109	0.0413402	False	False		A2m	0.222229	0.653199	0.289028	0.624227	0.814096	0.0893245	-0.00922412	0.0020206	False	False		C8g	0.0208137	0.0146588	0.0056841	0.0328365	0.0231691	0.00639743	False	False
ALKBH8_+_107436405.23-P1P2|ALKBH8_+_107436425.23-P1P2	ALKBH8	0.0604537	1.21858	-0.783655	2.22158	0.836244	0.0776668	-0.127299	0.0262838	False	False		A330021E22Rik	0.104655	0.980239	0.131024	0.42466	0.134072	0.872661	-0.894967	1.9153	False	False		Cab39	0.719733	-0.0326305	0.437532	0.561101	0.0563225	0.265743	False	False
ALLC_-_3705821.23-P1P2|ALLC_+_3706035.23-P1P2	ALLC	0.263954	0.578472	-0.0136729	0.0184004	0.989831	0.00443905	-0.040364	0.000476335	False	False		A330050F15Rik	0.236178	0.62676	0.258769	0.536255	0.118389	0.926688	-0.490873	1.11554	False	False		Cables1	0.261608	-0.0209146	0.101933	0.00364947	-0.00889726	0.000273039	False	False
ALMS1_+_73612991.23-P1P2|ALMS1_-_73612999.23-P1P2	ALMS1	0.136442	0.865052	-0.695701	1.40007	0.548827	0.260565	-0.247751	0.171617	False	False		A330070K13Rik	0.897944	0.0467507	-0.100923	0.0156004	0.90958	0.0411593	-0.0163717	0.00165252	False	False		Cables2	1.28325	0.10008	2.39261	0.0361938	-0.0487784	0.0148457	False	False
ALOX12_+_6899415.23-P1P2|ALOX12_+_6899409.23-P1P2	ALOX12	0.444619	0.352012	0.0503831	0.0412598	0.490755	0.309135	-0.269916	0.221823	False	False		A3galt2	0.368518	0.433542	0.179299	0.25702	0.809579	0.091741	0.135911	0.0305775	False	False		Cacna1a	0.0964855	0.0144221	0.0259241	0.100635	0.0418395	0.0354056	False	False
ALOX12B_+_7990948.23-P1P2|ALOX12B_-_7991020.23-P1P2	ALOX12B	0.223182	0.65134	0.0120329	0.0182331	0.256305	0.591243	-0.280788	0.44134	False	False		A430005L14Rik	0.406086	0.391382	-0.181188	0.23447	0.234792	0.629316	-0.424062	0.654458	False	False		Cacna1b	0.14776	0.0215515	0.0593265	1.12587	0.133532	1.2642	False	False
ALOX15_-_4544920.23-P1P2|ALOX15_+_4544912.23-P1P2	ALOX15	0.730733	0.136241	-0.243097	0.07705	0.360258	0.443387	0.301559	0.355454	False	False		A430033K04Rik	0.74957	0.125188	0.0309863	0.0128259	0.737165	0.132435	-0.107431	0.0348914	False	False		Cacna1c	0.0688745	-0.0218849	0.0280813	0.190079	0.0704375	0.112584	False	False
ALOX15B_-_7942419.23-P1P2|ALOX15B_-_7942393.23-P1P2	ALOX15B	0.14623	0.834964	-1.09238	2.1219	0.61848	0.208675	0.145815	0.0808909	False	False		A430078G23Rik	0.489105	0.310598	-0.173871	0.17856	0.176173	0.754061	0.471755	0.872383	False	False		Cacna1d	0.2493	-0.142416	0.661447	0.0783003	-0.103875	0.0683934	False	False
ALOX5_+_45869730.23-P1P2|ALOX5_+_45869734.23-P1P2	ALOX5	0.924761	0.0339703	-0.160351	0.0126723	0.643826	0.191232	-0.363265	0.184676	False	False		A430105I19Rik	0.298116	0.525615	-0.354803	0.616612	0.985479	0.00635254	-0.463488	0.00722053	False	False		Cacna1f	0.297994	-0.0168361	0.0934677	0.201746	0.0807627	0.137011	False	False
ALOX5AP_+_31309673.23-P1P2|ALOX5AP_+_31309779.23-P1P2	ALOX5AP	0.76201	0.118039	-0.0906223	0.0248855	0.928102	0.0324042	-0.0104262	0.000898163	False	False		A4galt	0.385641	0.413817	-0.887225	1.21395	0.203177	0.692126	0.392389	0.666017	False	False		Cacna1g	1.16186	-0.120754	2.61378	0.325178	-0.115533	0.315912	False	False
ALOXE3_-_8021474.23-P1P2|ALOXE3_-_8021463.23-P1P2	ALOXE3	0.131583	0.880799	0.127554	0.261369	0.954015	0.0204448	-0.0721247	0.00392007	False	False		A4gnt	0.945425	0.0243728	0.00564726	0.000455094	0.527923	0.27743	0.155114	0.105533	False	False		Cacna1h	0.387575	-0.0810965	0.58556	0.28368	-0.0172091	0.0410511	False	False
ALPI_+_233320899.23-P1P2|ALPI_+_233320877.23-P1P2	ALPI	0.0974981	1.011	0.185246	0.435698	0.709589	0.148993	0.175085	0.0693498	False	False		A530016L24Rik	0.602895	0.219758	-0.103206	0.0749907	0.650155	0.186983	-0.279626	0.128222	False	False		Cacna1i	0.198965	0.0272341	0.100949	0.085649	-0.059767	0.043045	False	False
ALPK1_+_113218559.23-P1P2|ALPK1_-_113218809.23-P1P2	ALPK1	0.673915	0.171395	-0.0515178	0.0205418	0.834527	0.0785594	0.118427	0.024733	False	False		A530032D15Rik	0.727278	0.1383	0.00971765	0.00444365	0.830521	0.0806494	-0.0775043	0.0153289	False	False		Cacna1s	0.42532	-0.057051	0.452057	0.147931	0.0333793	0.0415215	False	False
ALPK2_+_56296241.23-ENST00000361673.3|ALPK2_-_56296111.23-ENST00000361673.3	ALPK2	0.290133	0.537402	-0.691093	0.864012	0.245524	0.609906	-0.497306	0.806334	False	False		A530054K11Rik	0.997125	0.00125022	0.0101469	4.19447e-05	0.705013	0.151803	0.123133	0.0458394	False	False		Cacna2d1	1.17601	0.0649451	1.42289	0.207648	0.0150638	0.0263027	False	False
ALPK3_-_85360424.23-P1P2|ALPK3_-_85360414.23-P1P2	ALPK3	0.268478	0.571092	0.392243	0.521129	0.612719	0.212738	-0.201218	0.1138	False	False		A530064D06Rik	0.74684	0.126772	-0.276067	0.115717	0.0489574	1.31018	-0.579493	1.86193	False	False		Cacna2d2	0.216367	0.0207207	0.0835236	0.470614	-0.0316106	0.125094	False	False
ALPL_+_21835978.23-P1|ALPL_+_21835943.23-P1	ALPL	0.0193107	1.7142	0.0573201	0.228588	0.754462	0.122363	-0.119224	0.0387829	False	False		A530099J19Rik	0.884275	0.0534127	-0.060689	0.010718	0.907271	0.0422627	0.0865267	0.00896791	False	False		Cacna2d3	0.0561427	0.106533	0.111427	0.237842	0.0564298	0.112859	False	False
ALPL_+_21877779.23-P2|ALPL_-_21877787.23-P2	ALPL	0.496899	0.303732	-0.115586	0.081673	0.0394165	1.40432	0.794645	2.96666	False	False		A630001G21Rik	0.259764	0.585421	0.11844	0.229259	0.9327	0.0302581	-0.119718	0.00888356	False	False		Cacnb1	0.75869	-0.0943499	1.33358	0.74959	0.0939736	0.592336	False	False
ALPP_+_233243502.23-P1P2|ALPP_+_233243599.23-P1P2	ALPP	0.857774	0.066627	-0.255409	0.0395886	0.823179	0.0845057	-0.22464	0.0504664	False	False		A630007B06Rik	0.279451	0.553695	0.274475	0.502493	0.748172	0.125998	-0.177948	0.0549847	False	False		Cacnb2	0.342621	-0.0517507	0.330326	0.342297	0.0661693	0.190457	False	False
ALPPL2_+_233271581.23-P1P2|ALPPL2_+_233271588.23-P1P2	ALPPL2	0.499934	0.301088	-0.0126081	0.00883134	0.393099	0.405499	0.244008	0.26304	False	False		A630023A22Rik	0.0517148	1.28639	0.380705	1.61926	0.322488	0.491487	-0.361744	0.436011	False	False		Cacnb3	0.151775	-0.0117327	0.0331752	0.90447	0.172614	1.31283	False	False
ALS2_+_202645584.23-P1P2|ALS2_-_202645613.23-P1P2	ALS2	0.128986	0.889459	0.503167	1.04117	0.403374	0.394292	-1.17397	1.23056	False	False		A630033H20Rik	0.209142	0.679559	-0.116686	0.262181	0.113494	0.945028	0.538282	1.24749	False	False		Cacnb4	0.0977167	-0.0385995	0.0702691	0.323482	-0.0705133	0.191805	False	False
ALS2CL_+_46735125.23-P1P2|ALS2CL_+_46735113.23-P1P2	ALS2CL	0.443699	0.352912	0.0419334	0.0344278	0.437457	0.359065	0.175925	0.16793	False	False		A630073D07Rik	0.192655	0.71522	-0.273792	0.647468	0.580069	0.23652	0.21984	0.127514	False	False		Cacng1	0.389343	-0.0191491	0.138898	0.0121059	0.0564669	0.00574817	False	False
ALS2CR11_+_202483870.23-P1P2|ALS2CR11_+_202483880.23-P1P2	ALS2CR11	0.029299	1.53315	0.23469	0.83707	0.62708	0.202677	-0.185163	0.0997668	False	False		A630076J17Rik	0.779803	0.108015	0.05631	0.0201107	0.128675	0.890505	-0.707519	1.54511	False	False		Cacul1	0.101426	-0.0651589	0.123122	0.439962	-0.127896	0.473164	False	False
ALS2CR12_+_202222032.23-P1P2|ALS2CR12_+_202222077.23-P1P2	ALS2CR12	0.127565	0.894267	-0.27069	0.563148	0.584043	0.233555	-0.289261	0.179601	False	False		A630095E13Rik	0.885982	0.0525752	-0.00102582	0.000178325	0.41946	0.377309	0.222223	0.205622	False	False		Cacybp	0.844182	-0.0735583	1.15686	0.167287	-0.0525899	0.073978	False	False
ALX1_+_85674007.23-P1P2|ALX1_+_85674064.23-P1P2	ALX1	0.362932	0.440175	-0.38657	0.395855	0.131929	0.87966	0.703486	1.64512	False	False		A630095N17Rik	0.667595	0.175487	-0.0542877	0.0314995	0.0397935	1.40019	0.714955	2.45498	False	False		Cad	0.66846	-0.0697214	0.86827	0.272391	0.0865924	0.198341	False	False
ALX3_-_110613186.23-P1P2|ALX3_-_110613212.23-P1P2	ALX3	0.660887	0.179873	-0.327899	0.137211	0.13469	0.870665	0.131398	0.304135	False	False		A730017C20Rik	0.36967	0.432186	-0.19257	0.27518	0.460837	0.336453	0.337042	0.278094	False	False		Cadm1	0.71521	0.0297098	0.395865	0.32179	0.158942	0.430079	False	False
ALX4_-_44331565.23-P1P2|ALX4_-_44331571.23-P1P2	ALX4	0.21188	0.67391	0.165359	0.259247	0.312259	0.505485	0.0826254	0.111032	False	False		A830010M20Rik	0.64417	0.190999	0.212405	0.134139	0.794381	0.0999711	-0.137969	0.0338252	False	False		Cadm4	0.344314	-0.00163184	0.0104675	0.0638885	-0.011392	0.00612012	False	False
ALYREF_-_79849458.23-P1P2|ALYREF_-_79849452.23-P1P2	ALYREF	0.0117439	1.93019	-2.33751	10.4963	0.162492	0.789167	-4.26085	8.9391	True	False		A830018L16Rik	0.167407	0.776227	0.0944445	0.242395	0.416949	0.379917	-0.232194	0.216333	False	False		Calca	0.30285	0.0341106	0.192456	0.0746617	0.0202488	0.0127126	False	False
AMACR_+_34008110.23-P1P2|AMACR_-_34008125.23-P1P2	AMACR	0.0276368	1.55851	0.276681	1.00317	0.346607	0.460163	0.269725	0.32996	False	False		A830080D01Rik	0.674424	0.171067	-0.0859392	0.0486088	0.724572	0.139918	0.170808	0.0586093	False	False		Calcr	0.441893	0.0287124	0.236374	0.0452595	-0.0258176	0.00982573	False	False
AMBN_+_71458058.23-P1P2|AMBN_+_71457964.23-P1P2	AMBN	0.217557	0.662428	-0.00113784	0.00175348	0.264189	0.578086	0.35822	0.550516	False	False		A930009A15Rik	0.775384	0.110483	-0.260531	0.0951731	0.0336435	1.4731	-0.973009	3.51506	False	False		Calr	0.066537	-0.00666739	0.00826481	0.0746617	0.0213814	0.0134237	False	False
AMBP_+_116840506.23-P1P2|AMBP_-_116840545.23-P1P2	AMBP	0.90675	0.0425126	-0.148499	0.0146867	0.622593	0.205796	0.208564	0.114105	False	False		A930018P22Rik	0.604403	0.218674	0.104228	0.0753594	0.448975	0.347778	-0.427075	0.364242	False	False		Caly	0.1216	-0.0177719	0.0402608	0.131772	-0.00813399	0.0090129	False	False
AMBRA1_+_46615541.23-P1P2|AMBRA1_-_46615538.23-P1P2	AMBRA1	0.0453767	1.34317	-1.28629	4.01931	0.131623	0.880669	0.472474	1.10616	False	False		AA386476	0.642104	0.192394	0.416385	0.264877	0.965159	0.015401	-0.513683	0.0194012	False	False		Camk1	0.416216	-0.0134736	0.104476	0.0807392	-0.0433429	0.0294267	False	False
AMD1_-_111196001.23-P1P2|AMD1_-_111196005.23-P1P2	AMD1	0.0929861	1.03158	-0.611288	1.46701	0.530487	0.275325	0.440751	0.322602	False	False		AA415398	0.938544	0.0275452	-0.0572969	0.00521836	0.454665	0.342309	-0.249786	0.209686	False	False		Camk1d	0.2004	-0.0328862	0.122779	0.439962	-0.0601362	0.222479	False	False
AMDHD1_+_96337113.23-P1P2|AMDHD1_-_96337132.23-P1P2	AMDHD1	0.704257	0.152269	-0.108133	0.0383048	0.920826	0.0358225	-0.0114406	0.00108952	False	False		AA467197	0.636952	0.195893	0.117843	0.0763271	0.569153	0.244771	-0.180889	0.108582	False	False		Camk1g	0.926476	0.0747201	1.28969	0.176183	-0.0669904	0.0992466	False	False
AMDHD2_-_2570401.23-P1P2|AMDHD2_+_2570434.23-P1P2	AMDHD2	0.061992	1.20766	0.0261042	0.0733398	0.798682	0.097626	0.111498	0.0289374	False	False		AA474331	0.316202	0.500035	0.17072	0.282255	0.18494	0.732969	0.337212	0.60614	False	False		Camk2a	0.168076	-0.0437311	0.136933	0.579963	0.0585283	0.285434	False	False
AMELX_+_11311720.23-P1P2|AMELX_+_11311546.23-P1P2	AMELX	0.218101	0.661343	0.144064	0.221648	0.816014	0.0883023	0.0715357	0.0167928	False	False		AA474408	0.504622	0.297034	0.241232	0.236918	0.647013	0.189087	0.289601	0.13429	False	False		Camk2d	0.398227	0.0329091	0.244152	0.131772	0.065525	0.0726052	False	False
AMELY_+_6742063.23-P1P2|AMELY_-_6742053.23-P1P2	AMELY	0.528606	0.276868	0.0916071	0.0590046	0.28762	0.541181	-0.509512	0.733035	False	False		AA986860	0.504622	0.297034	-0.226171	0.222126	0.663311	0.178283	0.151391	0.0661903	False	False		Camk2g	1.9528	0.117111	4.26059	0.310025	-0.0288414	0.0751885	False	False
AMER1_+_63425562.23-P1P2|AMER1_+_63425598.23-P1P2	AMER1	0.938727	0.0274609	-0.16779	0.0107193	0.442627	0.353962	0.295812	0.278356	False	False		AA987161	0.36967	0.432186	-0.281314	0.401994	0.94776	0.0233018	-0.0344327	0.00196764	False	False		Camk2n1	0.1626	0.0165642	0.0501768	0.347491	-0.097979	0.286296	False	False
AMER2_-_25745692.23-P1P2|AMER2_+_25745684.23-P1P2	AMER2	0.000967111	3.01452	0.357997	2.51063	0.379984	0.420235	-0.647679	0.723569	False	False		AB041803	0.951736	0.0214834	-0.330829	0.0234999	0.970383	0.0130569	0.131056	0.00419645	False	False		Camk2n2	0.198965	0.00669268	0.0248079	0.000519489	-0.131497	0.000574422	False	False
AMER3_+_131513347.23-P1P2|AMER3_+_131513159.23-P1P2	AMER3	0.308222	0.511136	-0.336411	0.400027	0.390402	0.408488	0.207027	0.22482	False	False		AB041806	0.316202	0.500035	-0.196516	0.324904	0.706521	0.150875	0.13269	0.0490954	False	False		Camk4	0.179713	-0.0170107	0.056953	0.0406949	0.0137205	0.00469513	False	False
AMFR_+_56459315.23-P1P2|AMFR_-_56459192.23-P1P2	AMFR	0.73515	0.133624	-0.221887	0.0689765	0.6528	0.18522	0.0439498	0.0216408	False	False		AB099516	0.899085	0.0461994	-0.0475239	0.0072595	0.601684	0.220631	-0.0830341	0.044927	False	False		Camkk1	0.1216	-0.0390403	0.0884426	0.0930937	-0.088132	0.0689909	False	False
AMH_+_2248626.23-P1P2|AMH_-_2248783.23-P1P2	AMH	0.756485	0.121199	-0.0364889	0.0102883	0.425738	0.370858	-0.175402	0.17293	False	False		AB124611	0.432638	0.363875	-0.22645	0.272448	0.896895	0.0472585	0.0566611	0.00656672	False	False		Camkk2	0.0989504	0.00644172	0.011875	0.282059	0.0592595	0.140552	False	False
AMHR2_+_53818923.23-P1P2|AMHR2_+_53819137.23-P1P2	AMHR2	0.29631	0.528253	0.142641	0.175295	0.532242	0.273891	0.0936286	0.0681733	False	False		AC110575.1	0.914501	0.0388157	0.262006	0.0336261	0.53126	0.274693	0.35571	0.239622	False	False		Camkv	0.876061	-0.0588822	0.96102	0.472556	0.0748323	0.297359	False	False
AMICA1_-_118095677.23-P1P2|AMICA1_-_118095755.23-P1P2	AMICA1	0.414231	0.382758	-0.227331	0.202426	0.38871	0.410375	0.179899	0.196263	False	False		AC163993.1	0.722414	0.141214	-0.3107	0.145069	0.146196	0.835063	0.432189	0.885069	False	False		Caml	0.491119	-0.0143953	0.131711	0.816811	0.123984	0.851578	False	False
AMIGO1_-_110052323.23-P1P2|AMIGO1_-_110052326.23-P1P2	AMIGO1	0.0330679	1.48059	0.0233057	0.0802753	0.379038	0.421318	-0.550211	0.616264	False	False		ACE3	0.10952	0.960507	0.272797	0.866357	0.562257	0.250065	-0.194426	0.119231	False	False		Camp	0.881013	0.0770116	1.26401	0.237842	-0.0689584	0.137916	False	False
AMIGO2_+_47473698.23-P1P2|AMIGO2_-_47473651.23-P1P2	AMIGO2	0.882384	0.0543424	-0.216852	0.0274148	0.416184	0.380715	0.10452	0.105786	False	False		AF067061	0.123076	0.909826	-0.491936	1.47987	0.0926286	1.03325	0.545762	1.38291	False	False		Camta1	0.31428	0.0687821	0.402722	0.0544907	-0.0654585	0.0299935	False	False
AMIGO3_-_49757076.23-P2|AMIGO3_-_49757052.23-P2	AMIGO3	0.0620956	1.20694	-1.14319	3.20987	0.387891	0.411291	0.719038	0.786192	False	False		AF067063	0.890536	0.0503486	-0.0641419	0.0106779	0.46128	0.336036	-0.147096	0.121219	False	False		Cant1	0.885978	0.0289741	0.478242	0.218085	-0.133124	0.244129	False	False
AMIGO3_+_49761355.23-P1|AMIGO3_-_49761366.23-P1	AMIGO3	0.0209137	1.67957	-4.58255	17.9056	0.0998509	1.00065	0.501419	1.33386	True	False		AF251705	0.631306	0.19976	-0.151552	0.100099	0.503472	0.298025	0.425589	0.311047	False	False		Canx	0.070047	-0.0489942	0.0639363	0.419346	0.102048	0.359844	False	False
AMMECR1_+_109561105.23-P1P2|AMMECR1_+_109560923.23-P1P2	AMMECR1	0.0172342	1.76361	-2.62154	10.7558	0.829944	0.0809513	-0.213025	0.045844	True	False		AF366264	0.285582	0.544269	0.159188	0.286472	0.170654	0.767884	-0.421465	0.793672	False	False		Capn1	0.0470733	0.00419201	0.0036763	0.117306	-0.0631544	0.0622964	False	False
AMMECR1L_+_128643208.23-P1P2|AMMECR1L_-_128643556.23-P1P2	AMMECR1L	0.263603	0.57905	-0.533535	0.718725	0.0352826	1.45244	-0.871688	3.36579	False	False		AF529169	0.133377	0.874919	-0.410347	1.18707	0.168843	0.772516	-0.507661	0.961756	False	False		Capns1	0.407185	0.0259181	0.196612	0.689463	0.046492	0.269543	False	False
AMN_+_103389039.23-P1|AMN_-_103389029.23-P1	AMN	0.00915521	2.03833	-0.650689	3.08555	0.740688	0.130364	-0.189275	0.0655964	False	False		AI118078	0.224696	0.648405	-0.93491	2.00435	0.915389	0.0383942	-0.0811611	0.00764183	False	False		Capns2	0.522415	-0.0353298	0.343851	0.185751	-0.0681741	0.106485	False	False
AMN_+_103395231.23-P2|AMN_-_103395024.23-P2	AMN	0.0856609	1.06722	0.281088	0.697876	0.545395	0.263289	0.179228	0.125449	False	False		AI182371	0.532154	0.273963	-0.184981	0.167563	0.747069	0.126639	0.364631	0.113242	False	False		Car1	0.851491	-0.044226	0.701571	0.122528	0.0195524	0.0201453	False	False
AMN1_-_31881933.23-P1P2|AMN1_-_31881912.23-P1P2	AMN1	0.748332	0.125906	-0.0940789	0.0275564	0.039732	1.40086	-0.393306	1.46471	False	False		AI314180	0.948293	0.0230573	-0.0254105	0.00193722	0.014354	1.84303	-0.967352	4.3722	False	False		Car10	0.209068	0.014242	0.0554718	0.040706	-0.0322042	0.0110233	False	False
AMOT_-_112084054.23-P1P2|AMOT_-_112084018.23-P1P2	AMOT	0.572365	0.242327	-0.0620155	0.0349611	0.207774	0.68241	0.529326	0.960277	False	False		AI317395	0.485491	0.313819	0.215418	0.223521	0.134072	0.872661	0.550135	1.17733	False	False		Car11	0.655353	0.0477807	0.583367	0.881541	-0.0700352	0.519155	False	False
AMOTL1_-_94501700.23-P1P2|AMOTL1_-_94501686.23-P1P2	AMOTL1	0.956132	0.019482	-0.190452	0.00863184	0.362349	0.440872	-0.427023	0.500486	False	False		AI413582	0.0768998	1.11407	-1.06257	3.91409	0.10892	0.962893	0.602631	1.42303	False	False		Car12	0.97493	0.0610356	1.10859	0.370312	0.04603	0.143333	False	False
AMOTL2_+_134093279.23-P1P2|AMOTL2_-_134093230.23-P1P2	AMOTL2	0.378645	0.421767	0.356474	0.349771	0.0380882	1.41921	-0.653611	2.46601	False	False		AI427809	0.442849	0.353745	-0.0956319	0.111854	0.401659	0.396142	0.329413	0.320019	False	False		Car13	0.352821	-0.0224474	0.147549	0.201746	-0.0191922	0.0325587	False	False
AMPD1_-_115238088.23-P1P2|AMPD1_-_115238116.23-P1P2	AMPD1	0.173158	0.761557	0.257927	0.456965	0.0064022	2.19367	0.218305	1.2731	False	False		AI429214	0.785337	0.104944	-0.0879299	0.0305106	0.148433	0.828471	-0.324865	0.66003	False	False		Car14	0.17637	0.00753292	0.0247516	0.889154	0.0935409	0.699386	False	False
AMPD2_-_110162501.23-P1|AMPD2_+_110162524.23-P1	AMPD2	0.361264	0.442176	-0.0898395	0.0924157	0.502975	0.298454	0.130896	0.103856	False	False		AI462493	0.307856	0.511652	-0.255617	0.432436	0.771013	0.112938	-0.0280038	0.00775607	False	False		Car2	0.102667	-0.00123393	0.00236013	0.119912	-0.0993105	0.100137	False	False
AMPD2_+_110163780.23-P2|AMPD2_-_110163800.23-P2	AMPD2	0.00817533	2.08749	0.143088	0.694885	0.527936	0.277419	-0.113555	0.0837474	False	False		AI464131	0.535944	0.27088	-0.192986	0.172846	0.0843294	1.07402	-0.68632	1.80769	False	False		Car3	0.203278	-0.0273443	0.103555	0.0844176	-0.00607332	0.00431119	False	False
AMPD3_-_10476823.23-P1P2|AMPD3_-_10476980.23-P1P2	AMPD3	0.138304	0.859167	0.266286	0.532242	0.0867395	1.06178	-0.666223	1.88055	False	False		AI467606	0.65246	0.185446	-0.0811725	0.0497719	0.934436	0.0294503	0.0191839	0.00138551	False	False		Car4	0.407185	0.0286512	0.217344	0.0510095	-0.0460905	0.0197698	False	False
AMPH_+_38670931.23-P1P2|AMPH_-_38670993.23-P1P2	AMPH	6.38196e-05	4.19505	0.300507	2.93275	0.0225682	1.6465	0.277169	1.21321	False	False		AI481877	0.828711	0.081597	-0.114189	0.0308076	0.927024	0.0329088	0.0557565	0.00449978	False	False		Car5a	0.066537	0.00980033	0.0121484	0.797343	0.127661	0.855935	False	False
AMT_+_49459848.23-P1P2|AMT_-_49459857.23-P1P2	AMT	0.00643549	2.19142	-1.87146	9.54091	0.643181	0.191667	-0.265757	0.135413	False	False		AI593442	0.474738	0.323546	-0.246478	0.263677	0.273233	0.563467	0.342286	0.472978	False	False		Car5b	0.0928075	-0.0122945	0.0212573	1.8267	0.22407	3.44183	False	False
AMTN_+_71384334.23-P1P2|AMTN_+_71384355.23-P1P2	AMTN	0.828698	0.0816039	0.0828656	0.0157315	0.816699	0.087938	0.318928	0.0745585	False	False		AI597468	0.708428	0.149704	-0.279875	0.138534	0.139058	0.856803	0.859274	1.80549	False	False		Car6	0.82483	-0.0665613	1.02282	0.323482	-0.045424	0.123559	False	False
AMY1B_-_104239004.23-ENST00000330330.5,ENST00000370080.3|AMY1B_-_104238984.23-ENST00000330330.5,ENST00000370080.3	AMY1B	0.735744	0.133274	-0.102616	0.0318158	0.554024	0.256472	-0.116884	0.0796935	False	False		AI597479	0.208881	0.680102	-0.424949	0.955583	0.442028	0.35455	0.227297	0.197632	False	False		Car7	0.264713	-0.040661	0.200525	0.213595	0.0379885	0.068231	False	False
AMY2B_-_104104409.23-P1P2|AMY2B_-_104104404.23-P1P2	AMY2B	0.629008	0.201344	0.108982	0.0510479	0.301863	0.520191	0.314687	0.43518	False	False		AI606181	0.973559	0.0116379	-0.0732733	0.00281955	0.481445	0.317454	-0.00151986	0.00118323	False	False		Car8	0.712952	-0.0367504	0.48813	0.40642	0.0627141	0.214328	False	False
AMZ1_-_2728358.23-P1P2|AMZ1_+_2727832.23-P1P2	AMZ1	0.0168457	1.77351	-5.35618	22.099	0.539737	0.267818	-0.226246	0.161083	True	False		AI607873	0.630793	0.200113	-0.13802	0.091322	0.861299	0.0648462	-0.140365	0.0223218	False	False		Car9	0.6167	-0.0495281	0.569035	0.382812	-0.099692	0.320911	False	False
AMZ2_-_66244231.23-P1P2|AMZ2_-_66244242.23-P1P2	AMZ2	0.198822	0.701535	0.151856	0.247837	0.661805	0.17927	-0.119412	0.0569093	False	False		AI661453	0.697735	0.156309	0.220947	0.114191	0.707177	0.150472	-0.269241	0.0993529	False	False		Card10	0.150434	-0.00629426	0.0176403	0.945898	0.141329	1.12412	False	False
ANAPC1_-_112641691.23-P1P2|ANAPC1_-_112641707.23-P1P2	ANAPC1	0.0568495	1.24527	-8.06337	23.3596	0.280937	0.551391	3.53653	5.184	True	False		AI747448	0.29445	0.530988	-0.188799	0.331469	0.28128	0.550861	-0.470338	0.635382	False	False		Card11	0.0481983	-0.0132655	0.0119116	0.172917	-0.0163023	0.0237042	False	False
ANAPC10_+_146019314.23-P1P2|ANAPC10_+_146019317.23-P1P2	ANAPC10	0.0444277	1.35235	-9.8517	30.9944	0.752202	0.123665	1.4201	0.466868	True	False		AI836003	0.32889	0.48295	-0.51144	0.816684	0.0163521	1.78643	0.747133	3.27316	False	False		Card14	0.347708	0.0548475	0.355292	0.28368	-0.0685257	0.163464	False	False
ANAPC11_-_79849637.23-P1P2|ANAPC11_+_79849685.23-P1P2	ANAPC11	0.000537299	3.26978	-2.83675	21.5786	0.294307	0.5312	-3.23716	4.57141	True	False		AI837181	0.840108	0.075665	0.0708559	0.0177267	0.705013	0.151803	-0.453218	0.168722	False	False		Card6	0.0587518	-0.0172883	0.0189229	0.0196371	-0.0836073	0.0138058	False	False
ANAPC13_-_134204795.23-P1P2|ANAPC13_+_134204787.23-P1P2	ANAPC13	0.019202	1.71665	-2.00099	7.99116	0.244557	0.61162	-1.50775	2.45154	False	False		AI846148	0.692411	0.159636	-0.0541993	0.0286076	0.765891	0.115833	-0.00558108	0.00158539	False	False		Card9	0.456826	-0.0404252	0.344046	0.00574858	0.0239695	0.00115867	False	False
ANAPC15_+_71823713.23-P1P2|ANAPC15_-_71823727.23-P1P2	ANAPC15	0.0830974	1.08041	0.147209	0.370006	0.647318	0.188882	-0.083292	0.0418237	False	False		AI848285	0.490463	0.309393	-0.628762	0.643213	0.176639	0.752914	0.713052	1.31659	False	False		Carm1	0.238676	-0.00271354	0.0120659	0.651333	-0.0943749	0.51689	False	False
ANAPC16_+_73975790.23-P1P2|ANAPC16_+_73975820.23-P1P2	ANAPC16	0.27738	0.556925	0.026792	0.0347125	0.629422	0.201058	-0.235493	0.125872	False	False		AI987944	0.482524	0.316481	0.0842881	0.0882005	0.575121	0.240241	0.186596	0.109934	False	False		Cars	0.226701	-0.224847	0.94963	0.0535384	0.00714015	0.00321448	False	False
ANAPC2_+_140082989.23-P1P2|ANAPC2_+_140082980.23-P1P2	ANAPC2	0.00957388	2.01891	-4.73165	22.2236	0.349434	0.456635	-3.28636	3.98944	True	False		AK010878	0.954606	0.0201759	-0.0221236	0.00147586	0.0864457	1.06326	0.479934	1.25142	False	False		Cars2	0.756373	-0.0902961	1.27239	0.70773	0.187793	1.1176	False	False
ANAPC4_+_25378934.23-P1P2|ANAPC4_-_25378954.23-P1P2	ANAPC4	0.0457726	1.33939	-8.59638	26.786	0.421245	0.375465	-1.84774	1.84433	True	False		AK129341	0.258851	0.58695	0.009093	0.0176468	0.76478	0.116464	0.379583	0.108413	False	False		Cartpt	0.0144685	0.00195168	0.000526074	0.150663	0.00925681	0.0117275	False	False
ANAPC5_+_121790181.23-P1P2|ANAPC5_-_121790201.23-P1P2	ANAPC5	0.00092317	3.03472	-11.818	83.4342	0.163108	0.787525	1.56186	3.26991	True	False		AK157302	0.188505	0.724677	-0.159306	0.381711	0.722935	0.140901	0.252636	0.0872955	False	False		Casc5	3.81334	-0.383847	27.2695	0.829952	0.173291	1.2094	True	False
ANAPC7_-_110841548.23-P1P2|ANAPC7_+_110841268.23-P1P2	ANAPC7	0.0743398	1.12878	-0.931371	2.44577	0.963067	0.0163434	-0.0578542	0.00251365	False	False		ATF7	0.46676	0.330907	-0.256411	0.280543	0.267223	0.573126	-0.512806	0.720753	False	False		Cask	0.0735798	-0.0623805	0.0855109	0.675899	0.223705	1.27144	False	False
ANGEL1_+_77278971.23-P1P2|ANGEL1_+_77278828.23-P1P2	ANGEL1	0.942358	0.0257841	-0.181557	0.0108905	0.129816	0.886671	0.488764	1.1521	False	False		AU015836	0.385641	0.413817	-0.18492	0.253017	0.292815	0.533407	0.212002	0.277321	False	False		Casp1	0.1216	-0.038516	0.0872549	0.216586	-0.050869	0.0926449	False	False
ANGEL2_+_213188508.23-P1P2|ANGEL2_+_213188808.23-P1P2	ANGEL2	0.0561375	1.25075	-3.20918	9.33786	0.52043	0.283638	-2.73371	2.06132	False	False		AU016765	0.646238	0.189607	-0.33365	0.209172	0.394344	0.404125	0.290516	0.287919	False	False		Casp12	0.172211	-0.0577843	0.185389	0.0981102	-0.0362542	0.0299096	False	False
ANGPT1_+_108510112.23-P1P2|ANGPT1_+_108510118.23-P1P2	ANGPT1	0.41606	0.380844	-0.240402	0.212994	0.264953	0.576832	0.415572	0.63727	False	False		AU018091	0.915644	0.0382731	0.0106796	0.00135147	0.152356	0.81714	-0.321005	0.643267	False	False		Casp3	0.309364	-0.0328815	0.189511	0.0686503	-0.0169729	0.00979798	False	False
ANGPT2_+_6420744.23-P1P2|ANGPT2_+_6420752.23-P1P2	ANGPT2	0.286388	0.543045	0.200914	0.253822	0.14804	0.829622	0.250738	0.553004	False	False		AU019823	0.86667	0.0621461	0.13577	0.0278982	0.20266	0.693231	0.378496	0.643463	False	False		Casp4	0.0283269	0.0224331	0.0118386	0.138457	-0.0448871	0.0522605	False	False
ANGPT4_+_896929.23-P1P2|ANGPT4_+_896968.23-P1P2	ANGPT4	0.548915	0.260495	0.0296737	0.0179827	0.44501	0.351631	0.331187	0.30959	False	False		AU021092	0.326752	0.485781	-0.201982	0.324423	0.680302	0.167298	0.16949	0.0695376	False	False		Casp7	0.414404	-0.0449326	0.346896	0.266005	0.0994374	0.222422	False	False
ANGPTL1_+_178840213.23-P1P2|ANGPTL1_-_178840143.23-P1P2	ANGPTL1	0.998864	0.000493621	-0.184741	0.000212149	0.704303	0.15224	0.155361	0.0628779	False	False		AU022252	0.631818	0.199408	-0.503557	0.332008	0.114493	0.94122	-0.709475	1.63762	False	False		Casp8	0.172211	-0.0018577	0.00596005	0.0121059	-0.0648106	0.00659754	False	False
ANGPTL2_-_129884872.23-P1P2|ANGPTL2_+_129884905.23-P1P2	ANGPTL2	0.949585	0.0224664	-0.162776	0.0085076	0.0666035	1.1765	0.165653	0.518108	False	False		AU022751	0.834479	0.0785848	0.442332	0.114933	0.197042	0.705441	-0.170802	0.295486	False	False		Casp8ap2	1.04088	-0.0773183	1.49932	0.286932	-0.0944529	0.227894	False	False
ANGPTL3_-_63063180.23-P1P2|ANGPTL3_+_63063286.23-P1P2	ANGPTL3	0.814908	0.0888913	-0.110815	0.0229162	0.691687	0.16009	-0.267428	0.113815	False	False		AU023871	0.0397376	1.4008	0.477136	2.20992	0.332921	0.477659	-0.71361	0.835915	False	False		Casr	0.206168	0.00647738	0.024879	0.556944	0.0153706	0.0719847	False	False
ANGPTL4_-_8429281.23-P1P2|ANGPTL4_+_8429075.23-P1P2	ANGPTL4	0.173018	0.761909	0.0784773	0.139101	0.679683	0.167693	-0.141138	0.0629198	False	False		AU040320	0.0145494	1.83715	0.49664	3.01679	0.709343	0.149144	0.128558	0.0470206	False	False		Cast	0.0165739	0.0180101	0.00556102	0.106993	-0.0378313	0.0340364	False	False
ANGPTL5_+_101778543.23-P1P2|ANGPTL5_+_101778356.23-P1P2	ANGPTL5	0.802775	0.0954063	-0.142868	0.03171	0.472117	0.32595	0.22665	0.196397	False	False		AU041133	0.671794	0.172764	0.330027	0.188521	0.486902	0.312559	-0.613185	0.470009	False	False		Cat	1.17601	-0.0763454	1.67266	0.402755	0.0715769	0.242411	False	False
ANGPTL6_-_10213594.23-P1P2|ANGPTL6_-_10213591.23-P1P2	ANGPTL6	0.0715801	1.14521	0.197473	0.526109	0.691822	0.160005	-0.366132	0.15574	False	False		AW011738	0.25462	0.594107	-0.337182	0.662348	0.542299	0.265761	-0.402572	0.262373	False	False		Cav1	0.534349	0.0178911	0.178105	0.121219	-0.0637476	0.0649788	False	False
ANGPTL7_+_11249437.23-P1P2|ANGPTL7_-_11249433.23-P1P2	ANGPTL7	0.169945	0.769691	-0.718628	1.28678	0.567282	0.246201	0.253009	0.165598	False	False		AW112010	0.246891	0.607494	-0.172568	0.346625	0.682438	0.165937	0.319477	0.130007	False	False		Cbfa2t3	0.591483	-0.0696165	0.767129	0.678152	-0.0631416	0.360065	False	False
ANHX_+_133812391.23-P1P2|ANHX_+_133812402.23-P1P2	ANHX	0.486718	0.312722	-0.0384886	0.028001	0.941641	0.0261146	-0.0500261	0.00347302	False	False		AW146154	0.0291211	1.53579	-0.431099	2.1891	0.108599	0.964175	0.848949	2.00734	False	False		Cbfb	0.839325	-0.0516905	0.808266	0.153405	-0.0615665	0.0794188	False	False
ANK1_-_41655052.23-P1P2|ANK1_-_41655095.23-P1P2	ANK1	0.505158	0.296572	0.100648	0.0694418	0.563807	0.24887	0.150145	0.099337	False	False		AW209491	0.337529	0.471689	-0.315053	0.491357	0.150281	0.823095	0.505294	1.01995	False	False		Cbl	0.44004	-0.037614	0.308359	1.73439	0.305007	4.44831	False	False
ANK2_-_113970949.23-ENST00000264366.6|ANK2_-_113970921.23-ENST00000264366.6	ANK2	0.615699	0.210631	0.165013	0.0808586	0.312487	0.505168	0.42616	0.572318	False	False		AW549877	0.596383	0.224474	0.188125	0.139627	0.287173	0.541856	0.414723	0.551094	False	False		Cbr1	0.0977167	-0.0208456	0.0379487	0.38641	-0.107999	0.350918	False	False
ANK3_+_62149513.23-P1P2|ANK3_+_62149538.23-P1P2	ANK3	0.969011	0.0136712	-0.170938	0.0054366	0.369701	0.43215	0.316365	0.363456	False	False		AW551984	0.616522	0.210052	0.195191	0.135564	0.627265	0.202549	-0.0551906	0.0274144	False	False		Cbs	0.426625	-0.0440519	0.350126	0.0734155	-0.0199934	0.0123428	False	False
ANKAR_+_190539422.23-P1P2|ANKAR_-_190539475.23-P1P2	ANKAR	0.973891	0.0114899	-0.194016	0.00518605	0.536763	0.270217	-0.333388	0.239492	False	False		AW554918	0.45711	0.339979	-0.255956	0.287723	0.215861	0.665825	0.176443	0.288103	False	False		Cbx4	0.56058	0.0287587	0.300345	0.506047	-0.151788	0.645901	False	False
ANKDD1A_-_65204135.23-P1P2|ANKDD1A_-_65204113.23-P1P2	ANKDD1A	0.154697	0.810519	-0.0405807	0.0765185	0.962358	0.0166632	-0.0256611	0.00113674	False	False		AW822073	0.113408	0.945358	0.357929	1.1188	0.0736618	1.13276	-0.506871	1.40805	False	False		Ccar1	1.20168	0.097242	2.17699	0.41749	-0.116894	0.410372	False	False
ANKDD1B_+_74907371.23-P1P2|ANKDD1B_-_74907546.23-P1P2	ANKDD1B	0.0594443	1.22589	0.349093	0.995579	0.92851	0.0322136	-0.12404	0.0106226	False	False		AY074887	0.0524995	1.27985	-2.42888	10.2783	0.343934	0.463525	0.364531	0.414373	True	False		Ccar2	0.0723996	-0.00314779	0.00424577	0.622802	-0.179754	0.941384	False	False
ANKEF1_+_10015769.23-P1P2|ANKEF1_-_10015901.23-P1P2	ANKEF1	0.471702	0.326332	-0.278077	0.21111	0.150318	0.822989	0.454975	0.995427	False	False		AY358078	0.300128	0.522694	-0.4656	0.80467	0.919975	0.0362238	0.283953	0.0252246	False	False		Ccbl1	0.0771353	-0.0174163	0.0250278	0.222602	0.106093	0.198589	False	False
ANKFN1_-_54231022.23-P1P2|ANKFN1_-_54230873.23-P1P2	ANKFN1	0.842345	0.0745102	-0.216978	0.0376111	0.351452	0.454134	-0.796282	0.961345	False	False		AY702102	0.578027	0.238052	0.269323	0.211984	0.477825	0.320731	-0.383389	0.301554	False	False		Ccbl2	0.181954	0.0183354	0.0621534	0.040706	0.0295116	0.0101016	False	False
ANKFY1_+_4166925.23-P1P2|ANKFY1_-_4167096.23-P1P2	ANKFY1	0.750138	0.124859	-0.241966	0.0702844	0.123409	0.908653	-0.312849	0.755719	False	False		AY761185	0.552687	0.25752	0.0845763	0.0720142	0.185907	0.730705	0.925695	1.6588	False	False		Ccdc103	0.954253	0.0277682	0.493657	0.375651	-0.113655	0.359015	False	False
ANKH_-_14871820.23-P1P2|ANKH_-_14871737.23-P1P2	ANKH	0.0844135	1.07359	-0.97125	2.42578	0.295463	0.529497	-0.891321	1.25466	False	False		Aaas	0.911644	0.0401749	-0.0383322	0.00509185	0.687788	0.162545	-0.249463	0.099441	False	False		Ccdc176	0.0607373	-0.0259569	0.0293712	1.30458	-0.201857	2.21439	False	False
ANKIB1_-_91875700.23-P1P2|ANKIB1_+_91875590.23-P1P2	ANKIB1	0.000451737	3.34511	-4.53391	35.2832	0.24568	0.60963	-1.32834	2.1528	True	False		Aacs	0.208881	0.680102	0.286718	0.644742	0.206035	0.68606	-0.5071	0.853177	False	False		Ccdc32	0.149096	-0.0120933	0.033591	0.28044	-0.0411803	0.097111	False	False
ANKK1_+_113258562.23-P1P2|ANKK1_+_113258540.23-P1P2	ANKK1	0.0903031	1.0443	0.244261	0.593419	0.779166	0.10837	0.0378391	0.0109013	False	False		Aadac	0.256428	0.591035	0.35281	0.689464	0.851014	0.0700635	-0.153428	0.0263621	False	False		Ccdc6	1.29214	-0.106425	2.56192	0.258087	-0.0687829	0.149275	False	False
ANKLE1_-_17392727.23-P1P2|ANKLE1_+_17392722.23-P1P2	ANKLE1	0.0675316	1.17049	0.201819	0.549558	0.285465	0.544447	-0.459916	0.665676	False	False		Aadacl2	0.813167	0.0898202	0.0117292	0.00348339	0.852726	0.0691905	0.0385176	0.00653566	False	False		Cck	1.46045	0.110799	3.01466	0.357961	-0.109417	0.32935	False	False
ANKLE2_+_133338375.23-P1P2|ANKLE2_+_133338404.23-P1P2	ANKLE2	0.0375619	1.42525	-4.08495	13.5445	0.955558	0.019743	0.0520388	0.00273129	True	False		Aadacl3	0.259459	0.585931	-0.248029	0.480513	0.319647	0.495329	0.138212	0.167889	False	False		Cckar	0.214902	0.0213654	0.085539	0.00364947	0.0710253	0.00217962	False	False
ANKMY1_+_241497155.23-P1P2|ANKMY1_+_241497400.23-P1P2	ANKMY1	0.340408	0.468	0.131833	0.143533	0.196386	0.70689	-0.264699	0.497431	False	False		Aadat	0.334272	0.4759	0.106059	0.166886	0.263786	0.578749	0.524871	0.744949	False	False		Cckbr	0.070047	-0.0135514	0.0176843	0.00469778	-0.00235473	9.3019e-05	False	False
ANKMY2_+_16685345.23-P1P2|ANKMY2_-_16685324.23-P1P2	ANKMY2	0.0349752	1.45624	0.210535	0.713248	0.441884	0.354691	-0.225727	0.212844	False	False		Aaed1	0.198125	0.703061	-0.296294	0.688768	0.676039	0.170029	0.753579	0.31422	False	False		Ccl12	0.407185	-0.0250779	0.190238	0.108272	-0.100933	0.0918942	False	False
ANKRA2_+_72861001.23-P1P2|ANKRA2_-_72861459.23-P1P2	ANKRA2	0.0113635	1.94449	-2.93804	13.2907	0.601784	0.220559	0.351716	0.206227	True	False		Aagab	0.00272837	2.5641	-0.642472	5.44685	0.738812	0.131466	-0.478636	0.154313	False	False		Ccl22	0.964566	-0.0702474	1.26234	0.664684	0.126707	0.708198	False	False
ANKRD1_+_92680828.23-P1P2|ANKRD1_+_92680850.23-P1P2	ANKRD1	0.813427	0.0896812	-0.0790608	0.0164948	0.352638	0.452671	-0.211975	0.255092	False	False		Aak1	0.672846	0.172085	-0.567286	0.322776	0.740688	0.130365	-0.112814	0.0360665	False	False		Ccl4	0.231171	-0.0295995	0.127477	0.326876	0.030183	0.0829629	False	False
ANKRD10_+_111567378.23-P1P2|ANKRD10_-_111567334.23-P1P2	ANKRD10	0.509476	0.292876	0.0007657	0.000521706	0.46809	0.329671	0.252956	0.221694	False	False		Aamdc	0.590898	0.228487	-0.133709	0.101014	0.717488	0.144186	-0.381932	0.135049	False	False		Ccl5	0.329181	0.0435053	0.266803	0.0930937	-0.0354932	0.0277846	False	False
ANKRD11_+_89556932.23-P1P2|ANKRD11_-_89556765.23-P1P2	ANKRD11	0.153522	0.813831	-0.779541	1.4759	0.248888	0.603997	-0.386138	0.620019	False	False		Aamp	0.441992	0.354585	-0.721779	0.846218	0.339874	0.468682	-0.297728	0.342201	False	False		Ccna1	0.0250923	-0.00893222	0.00417556	1.29322	0.232144	2.52445	False	False
ANKRD12_-_9136808.23-P1P2|ANKRD12_+_9137050.23-P1P2	ANKRD12	0.569189	0.244744	-0.0477677	0.0271975	0.893575	0.0488688	-0.00028824	3.74467e-05	False	False		Aanat	0.0578936	1.23737	-0.358323	1.46599	0.604221	0.218804	0.260686	0.13988	False	False		Ccna2	1.5306	-0.141244	4.02759	0.935461	-0.233821	1.83928	False	False
ANKRD13A_+_110437696.23-P1P2|ANKRD13A_+_110437230.23-P1P2	ANKRD13A	0.0426858	1.36972	0.0418501	0.133355	0.922919	0.0348365	0.0234205	0.00216899	False	False		Aar2	0.510623	0.291899	-0.144423	0.139389	0.779261	0.108317	0.373779	0.0992876	False	False		Ccnb1ip1	1.7646	0.085438	2.80873	0.365001	-0.0975367	0.299364	False	False
ANKRD13B_+_27920377.23-P1P2|ANKRD13B_+_27920172.23-P1P2	ANKRD13B	0.266129	0.574907	-0.100829	0.134854	0.357988	0.446131	0.105636	0.125286	False	False		Aard	0.643653	0.191348	-0.197121	0.124713	0.601178	0.220997	0.38694	0.209708	False	False		Ccnb2	0.893449	-0.0889895	1.48123	0.19735	0.0818833	0.135884	False	False
ANKRD13C_+_70820351.23-P1P2|ANKRD13C_-_70820382.23-P1P2	ANKRD13C	0.992299	0.00335726	-0.180924	0.00141307	0.963255	0.0162587	0.000115937	5.01112e-06	False	False		Aars	0.0523862	1.28078	-0.84797	3.59099	0.104947	0.979031	0.784265	1.88297	False	False		Ccnb3	0.0867286	0.012825	0.0207221	0.0893593	0.0692784	0.0520566	False	False
ANKRD13D_+_67056813.23-P1P2|ANKRD13D_-_67056373.23-P1P2	ANKRD13D	0.0328664	1.48325	-2.3102	7.97163	0.608977	0.215399	0.249709	0.14299	False	False		Aars2	0.000517294	3.28626	-2.15084	23.3705	0.000356794	3.44758	1.37735	11.6451	True	True		Ccnc	1.58591	0.110812	3.274	1.27207	-0.165052	1.7655	False	False
ANKRD16_+_5931865.23-P1P2|ANKRD16_+_5931814.23-P1P2	ANKRD16	0.401589	0.396218	-0.443832	0.409107	0.492725	0.307395	-0.533083	0.435632	False	False		Aarsd1	0.0680845	1.16695	0.343814	1.32658	0.0861789	1.0646	-0.587175	1.53298	False	False		Ccnd1	0.38581	-0.10583	0.76067	0.488204	0.133336	0.547377	False	False
ANKRD17_+_74124528.23-P1P2|ANKRD17_+_74124315.23-P1P2	ANKRD17	0.0747721	1.12626	-5.82678	15.2669	0.644034	0.191091	-1.35141	0.686524	True	False		Aasdh	0.689224	0.16164	-0.124476	0.066526	0.576088	0.239511	-0.2168	0.127341	False	False		Ccnd2	2.96628	-0.157224	8.6885	0.464806	0.133986	0.523686	True	False
ANKRD18A_-_38577100.23-ENST00000564591.1,ENST00000566717.2|ANKRD18A_+_38576705.23-ENST00000564591.1,ENST00000566717.2	ANKRD18A	0.0108707	1.96374	0.238608	1.09007	0.201082	0.696628	-0.574146	1.06329	False	False		Aasdhppt	0.00427661	2.3689	-1.88441	14.7598	0.00871587	2.05969	1.0034	5.06829	True	False		Ccnd3	0.0618922	-0.0222033	0.0256016	0.649119	0.115803	0.632095	False	False
ANKRD18B_-_33524277.23-P1P2|ANKRD18B_-_33524270.23-P1P2	ANKRD18B	0.449247	0.347515	0.122251	0.0988342	0.664513	0.177497	-0.126483	0.0596832	False	False		Aass	0.260985	0.583385	0.109685	0.211572	0.125411	0.901664	-0.582394	1.28779	False	False		Ccne1	1.60566	-0.130842	3.91396	0.0306111	-0.0200194	0.0051531	False	False
ANKRD2_-_99332575.23-P1P2|ANKRD2_-_99332572.23-P1P2	ANKRD2	0.753705	0.122798	-0.107314	0.0306572	0.936062	0.0286952	-0.0562319	0.00428964	False	False		Aatf	0.00013679	3.86395	-2.84761	36.3805	0.0421067	1.37565	1.2424	4.19135	True	False		Ccne2	0.1626	0.0358944	0.108733	0.605514	-0.177746	0.905028	False	False
ANKRD22_-_90611584.23-P1P2|ANKRD22_+_90611514.23-P1P2	ANKRD22	0.801086	0.0963209	-0.236848	0.0530731	0.847662	0.0717772	-0.217312	0.0414666	False	False		Aatk	0.153251	0.814596	0.138979	0.374325	0.44506	0.351582	-0.667049	0.575133	False	False		Ccnf	0.556511	-0.050699	0.525638	0.876483	-0.161075	1.18716	False	False
ANKRD23_-_97523606.23-P1|ANKRD23_+_97523642.23-P1	ANKRD23	0.920029	0.0361987	-0.20468	0.0172367	0.194064	0.712055	0.507372	0.960435	False	False		Abat	0.355991	0.448561	-0.216807	0.321554	0.236517	0.626137	0.392313	0.602401	False	False		Ccng1	0.566706	0.0258239	0.272642	0.0556563	-0.0262715	0.0122952	False	False
ANKRD23_+_97509682.23-P2|ANKRD23_-_97509672.23-P2	ANKRD23	0.209016	0.67982	0.19142	0.302736	0.0486981	1.31249	0.474024	1.65396	False	False		Abca1	0.177607	0.75054	-0.339257	0.8419	0.384717	0.414859	-0.254359	0.258781	False	False		Ccng2	0.827238	0.0542828	0.836578	0.449455	-0.0961537	0.363405	False	False
ANKRD24_+_4198441.23-P1P2|ANKRD24_+_4198444.23-P1P2	ANKRD24	0.108612	0.964124	-0.376766	0.845062	0.540328	0.267343	0.113404	0.0805978	False	False		Abca12	0.553652	0.256763	0.0689413	0.0585288	0.555891	0.255011	-0.302888	0.189419	False	False		Ccnh	1.23342	-0.147245	3.38349	0.253372	0.0993643	0.211703	False	False
ANKRD26_-_27389221.23-P1P2|ANKRD26_+_27389387.23-P1P2	ANKRD26	0.430229	0.3663	0.0117322	0.00999774	0.605992	0.217533	-0.202503	0.117108	False	False		Abca13	0.595884	0.224838	0.0228419	0.0169808	0.530305	0.275474	-0.18382	0.124182	False	False		Ccni	0.389343	0.04893	0.354913	0.38641	0.0985376	0.320176	False	False
ANKRD27_+_33166026.23-P1P2|ANKRD27_+_33166056.23-P1P2	ANKRD27	0.884086	0.0535055	-0.233558	0.0290722	0.59664	0.224287	-0.168957	0.100741	False	False		Abca14	0.720796	0.142188	0.0526795	0.0247663	0.90958	0.0411593	-0.0742929	0.00749893	False	False		Ccnj	0.346009	-0.0472617	0.304657	0.285305	0.0614258	0.147366	False	False
ANKRD28_-_15839402.23-P1P2|ANKRD28_+_15839382.23-P1P2	ANKRD28	0.482431	0.316565	0.0832234	0.0612903	0.145078	0.838399	0.98103	2.18656	False	False		Abca15	0.404866	0.392689	0.182846	0.237406	0.280955	0.551363	-0.380636	0.514672	False	False		Ccnk	1.76806	-0.219538	7.23137	0.421205	-0.0300252	0.106345	True	False
ANKRD29_-_21242795.23-P1P2|ANKRD29_+_21242843.23-P1P2	ANKRD29	0.883995	0.0535502	-0.26324	0.0327941	0.117473	0.930062	0.302778	0.748625	False	False		Abca16	0.511087	0.291506	-0.1091	0.105154	0.930964	0.0310673	-0.304837	0.023225	False	False		Ccnl1	0.149096	0.00583863	0.0162178	0.0229027	-0.0847558	0.0163228	False	False
ANKRD30A_+_37414734.23-P1P2|ANKRD30A_+_37414731.23-P1P2	ANKRD30A	0.03907	1.40816	0.16865	0.552485	0.752337	0.123588	0.0744923	0.0244745	False	False		Abca17	0.0670032	1.1739	0.410953	1.59508	0.221311	0.654996	-0.427201	0.686207	False	False		Ccno	0.0113285	0.0025939	0.000547443	0.449455	0.151365	0.57207	False	False
ANKRD30B_+_14748218.23-P1P2|ANKRD30B_-_14748199.23-P1P2	ANKRD30B	0.410914	0.386249	0.273142	0.245437	0.197411	0.70463	-0.226312	0.423932	False	False		Abca2	0.703609	0.152669	0.122271	0.0617207	0.170881	0.767306	-0.477859	0.899191	False	False		Ccnt1	0.27263	0.00210457	0.0106893	0.542495	0.158119	0.721303	False	False
ANKRD31_-_74532673.23-P1P2|ANKRD31_-_74532663.23-P1P2	ANKRD31	0.0333012	1.47754	-2.7805	9.55753	0.318033	0.497528	-1.43536	1.89848	False	False		Abca3	0.991376	0.00376144	0.0749426	0.000932053	0.873328	0.0588228	-0.00728221	0.00105049	False	False		Ccnt2	0.728818	-0.0508301	0.690167	0.44755	0.0569281	0.214243	False	False
ANKRD32_+_93954429.23-P1P2|ANKRD32_+_93954716.23-P1P2	ANKRD32	0.0148037	1.82963	-2.53667	10.7972	0.815259	0.0887042	-0.1262	0.0297599	True	False		Abca4	0.954032	0.0204371	0.0342385	0.00231362	0.717488	0.144186	0.0014491	0.000512393	False	False		Ccny	0.0572876	0.0635617	0.0678374	0.457106	-0.123343	0.474099	False	False
ANKRD33_+_52282089.23-P1P2|ANKRD33_+_52282132.23-P1P2	ANKRD33	0.942665	0.0256428	-0.171241	0.0102154	0.231927	0.634648	0.412521	0.695997	False	False		Abca5	0.482341	0.316646	-0.150364	0.157426	0.971544	0.0125377	0.309836	0.00952646	False	False		Ccp110	2.88579	-0.154271	8.29398	1.17462	0.0447469	0.441976	True	False
ANKRD33B_+_10564429.23-P1P2|ANKRD33B_+_10564449.23-P1P2	ANKRD33B	0.0359777	1.44397	0.178859	0.600832	0.197965	0.703411	-0.188435	0.35237	False	False		Abca6	0.293125	0.532947	0.297955	0.525041	0.352546	0.452784	-0.220407	0.244738	False	False		Ccpg1	2.07857	0.0873497	3.38251	0.222602	0.0481978	0.0902181	False	False
ANKRD34A_-_145470559.23-P2|ANKRD34A_-_145470579.23-P2	ANKRD34A	0.6487	0.187956	-0.321247	0.140469	0.327902	0.484256	0.286657	0.369033	False	False		Abca7	0.795883	0.099151	0.117409	0.0384907	0.422402	0.374274	-0.197148	0.180953	False	False		Ccr1	0.286762	-0.0390824	0.208793	0.0441173	-0.00115449	0.000428288	False	False
ANKRD34A_-_145472547.23-P1|ANKRD34A_+_145472473.23-P1	ANKRD34A	0.469959	0.32794	0.0671906	0.0512609	0.86102	0.0649869	0.0839762	0.0145081	False	False		Abca8a	0.814285	0.0892233	0.0830401	0.0244976	0.078725	1.10389	-0.518538	1.40375	False	False		Ccr5	1.06782	0.0830656	1.65247	0.370312	-0.158322	0.493	False	False
ANKRD34B_-_79864939.23-P2|ANKRD34B_-_79864923.23-P2	ANKRD34B	0.815747	0.0884446	-0.0843367	0.0173529	0.681366	0.16662	0.194976	0.0863645	False	False		Abca8b	0.429686	0.366849	0.05298	0.0642624	0.654353	0.184188	-0.487419	0.220165	False	False		Cct3	1.79588	-0.180533	6.04015	0.974876	0.23213	1.90291	False	False
ANKRD34B_+_79866043.23-P1|ANKRD34B_-_79866050.23-P1	ANKRD34B	0.916085	0.0380642	-0.225596	0.0199771	0.4911	0.30883	0.150211	0.123325	False	False		Abca9	0.711647	0.147735	-0.0363187	0.0177408	0.456864	0.340213	0.243958	0.20354	False	False		Ccz1	0.65318	0.0048743	0.0593142	0.147931	0.0385394	0.0479404	False	False
ANKRD34C_+_79575155.23-P1P2|ANKRD34C_-_79575161.23-P1P2	ANKRD34C	0.295181	0.529912	0.11445	0.141092	0.819545	0.0864271	-0.125112	0.028746	False	False		Abcb10	0.869505	0.0607277	0.0217634	0.00436989	0.880215	0.0554114	0.0784059	0.0106545	False	False		Cd109	0.366584	0.00677564	0.046274	0.814366	-0.21075	1.4432	False	False
ANKRD35_-_145562333.23-P1P2|ANKRD35_-_145562352.23-P1P2	ANKRD35	0.788457	0.103222	-0.265922	0.0638572	0.639377	0.194243	0.176925	0.0913615	False	False		Abcb11	0.386826	0.412484	-0.17812	0.242927	0.377198	0.42343	-0.155818	0.161801	False	False		Cd160	0.00511342	-0.0128755	0.00122657	0.311697	-0.0612485	0.160534	False	False
ANKRD36_+_97779467.23-P1P2|ANKRD36_-_97779499.23-P1P2	ANKRD36	0.857965	0.0665303	-0.219495	0.0339726	0.732498	0.135194	-0.114554	0.0411712	False	False		Abcb1a	0.0553705	1.25672	0.581704	2.41712	0.248248	0.605115	-0.432383	0.641638	False	False		Cd180	0.998439	0.0725721	1.34991	0.472556	0.172949	0.687241	False	False
ANKRD36C_-_96657460.23-P1P2|ANKRD36C_-_96657464.23-P1P2	ANKRD36C	0.44996	0.346826	0.0274184	0.0221227	0.763937	0.116943	-0.11375	0.0353632	False	False		Abcb1b	0.109799	0.959401	0.389442	1.23538	0.827602	0.0821787	0.0732112	0.0147543	False	False		Cd19	0.0712221	-0.0177864	0.0236003	0.504052	0.088667	0.375817	False	False
ANKRD37_-_186317926.23-P1P2|ANKRD37_+_186317774.23-P1P2	ANKRD37	0.890171	0.0505268	-0.139061	0.0163459	0.100701	0.996964	-0.648436	1.7186	False	False		Abcb4	0.937971	0.0278105	-0.165931	0.0152579	0.240578	0.618745	0.421302	0.639277	False	False		Cd1d1	0.130637	0.0116287	0.0283014	0.569453	0.126971	0.607995	False	False
ANKRD39_+_97523562.23-P1P2|ANKRD39_-_97523708.23-P1P2	ANKRD39	0.00792301	2.10111	-2.81838	13.7763	0.89564	0.0478663	-0.263602	0.0335434	True	False		Abcb5	0.897944	0.0467507	-0.0247924	0.00383234	0.145994	0.835664	-0.787584	1.61403	False	False		Cd2	0.346009	-0.0108991	0.0702572	0.0722492	-0.000796518	0.000483913	False	False
ANKRD40_+_48785164.23-P1P2|ANKRD40_+_48785242.23-P1P2	ANKRD40	0.148031	0.829647	-0.501601	0.968135	0.67963	0.167728	0.190677	0.0850219	False	False		Abcb6	0.558486	0.252987	-0.0818009	0.068425	0.333285	0.477185	0.220853	0.258448	False	False		Cd209e	0.612467	0.0655135	0.747528	0.300057	0.104252	0.263044	False	False
ANKRD42_-_82904842.23-P1P2|ANKRD42_+_82905009.23-P1P2	ANKRD42	0.138532	0.858451	-0.520733	1.03995	0.117364	0.930466	-0.570757	1.41182	False	False		Abcb7	0.000113714	3.94419	-3.49298	45.5524	0.0889256	1.05097	-1.49222	3.846	True	False		Cd247	0.196102	0.0119158	0.043533	0.127794	-0.0563379	0.0605409	False	False
ANKRD44_-_198062864.23-ENST00000328737.2|ANKRD44_-_198062882.23-ENST00000328737.2	ANKRD44	0.530048	0.275685	-0.0733196	0.0470237	0.624143	0.204716	-0.128159	0.0697474	False	False		Abcb8	0.251628	0.599241	-0.179267	0.35519	0.177728	0.750245	0.518927	0.954758	False	False		Cd27	0.418031	0.0308441	0.240212	0.3201	0.0755889	0.203462	False	False
ANKRD44_+_198051801.23-ENST00000450567.1|ANKRD44_-_198051829.23-ENST00000450567.1	ANKRD44	0.518453	0.28529	0.0716335	0.047543	0.00559579	2.25214	-0.512733	3.06983	False	False		Abcb9	0.7317	0.135667	0.0671732	0.0301319	0.785998	0.104578	0.0451977	0.0115916	False	False		Cd28	0.274095	0.0120409	0.0614855	1.28716	0.211055	2.28436	False	False
ANKRD45_+_173638942.23-P1P2|ANKRD45_+_173638762.23-P1P2	ANKRD45	0.0165651	1.78081	0.273459	1.1329	0.449278	0.347485	-0.183247	0.169279	False	False		Abcc1	0.745203	0.127725	0.132558	0.055981	0.350288	0.455575	-0.658879	0.73612	False	False		Cd2ap	0.827238	-0.0851357	1.31207	0.0306111	0.106173	0.0273295	False	False
ANKRD46_-_101571968.23-P1P2|ANKRD46_-_101571982.23-P1P2	ANKRD46	0.394647	0.403792	-0.0783729	0.0736219	0.210817	0.676094	0.110042	0.197785	False	False		Abcc10	0.459731	0.337496	-0.0821288	0.0916479	0.849872	0.0706463	-0.0282403	0.00489263	False	False		Cd36	0.191829	-0.0241142	0.0861792	0.624978	-0.130012	0.683259	False	False
ANKRD49_+_94226755.23-P1P2|ANKRD49_-_94226994.23-P1P2	ANKRD49	0.00621918	2.20627	-4.32513	22.1994	0.445515	0.351138	-2.49733	2.33122	True	False		Abcc12	0.889966	0.0506264	-0.0295976	0.00495439	0.729491	0.13698	-0.21781	0.0731675	False	False		Cd38	0.29037	0.0426481	0.230709	0.556944	-0.301792	1.41338	False	False
ANKRD50_+_125633644.23-P1P2|ANKRD50_+_125633864.23-P1P2	ANKRD50	0.566392	0.246883	0.0466641	0.0268014	0.535975	0.270856	0.150944	0.108688	False	False		Abcc2	0.267147	0.573249	0.0986446	0.186971	0.426201	0.370386	-0.261867	0.237859	False	False		Cd3d	0.0315835	0.024906	0.0146547	0.476449	-0.0976084	0.391059	False	False
ANKRD52_-_56652125.23-P1P2|ANKRD52_-_56651964.23-P1P2	ANKRD52	0.00145804	2.83623	-10.6755	70.4394	0.93199	0.030589	0.0335438	0.00272776	True	False		Abcc3	0.192163	0.716329	0.547333	1.29635	0.948339	0.0230363	-0.237678	0.0134272	False	False		Cd3e	0.0618922	-0.0417381	0.0481263	0.430545	-0.0833286	0.301683	False	False
ANKRD53_-_71205788.23-P1P2|ANKRD53_+_71206088.23-P1P2	ANKRD53	0.599806	0.221989	0.0169934	0.00877596	0.456137	0.340905	-0.220779	0.200087	False	False		Abcc4	0.568216	0.245486	0.12545	0.101825	0.196285	0.707113	-0.572254	0.992343	False	False		Cd3g	0.217835	-0.0151001	0.0612804	0.113418	-0.000250546	0.000238951	False	False
ANKRD54_+_38240313.23-P1P2|ANKRD54_+_38240316.23-P1P2	ANKRD54	0.259733	0.585473	-0.304102	0.4142	0.594249	0.226032	0.109932	0.0660575	False	False		Abcc5	0.041361	1.38341	-0.534549	2.44509	0.663311	0.178283	-0.516132	0.22566	False	False		Cd4	0.0102866	-0.024766	0.00474617	0.556944	-0.145547	0.681636	False	False
ANKRD55_-_55529169.23-ENST00000341048.4|ANKRD55_+_55529195.23-ENST00000341048.4	ANKRD55	0.0638888	1.19458	0.175791	0.488534	0.223118	0.651465	-0.617464	1.06938	False	False		Abcc6	0.952884	0.02096	0.00124995	8.66249e-05	0.263786	0.578749	0.592123	0.8404	False	False		Cd40	0.0414857	0.0137955	0.0106623	0.382812	0.0592117	0.190604	False	False
ANKRD6_-_90142922.23-P1P2|ANKRD6_-_90142974.23-P1P2	ANKRD6	0.72212	0.14139	-0.0759576	0.0249847	0.593533	0.226555	-0.242216	0.145883	False	False		Abcc8	0.41181	0.385303	0.158952	0.2025	0.0528073	1.27731	-0.506861	1.5877	False	False		Cd40lg	0.373534	-0.0692732	0.482069	0.116008	0.0265752	0.025924	False	False
ANKRD60_+_56803320.23-ENST00000457363.1|ANKRD60_+_56803339.23-ENST00000457363.1	ANKRD60	0.272902	0.563993	0.046648	0.0612055	0.765949	0.1158	-0.107516	0.0330988	False	False		Abcc9	0.152423	0.816948	0.168112	0.454099	0.111679	0.952028	-0.506601	1.18277	False	False		Cd44	1.67238	-0.0773383	2.40959	0.451363	-0.0280017	0.106279	False	False
ANKRD61_-_6071023.23-P1P2|ANKRD61_+_6071171.23-P1P2	ANKRD61	0.33081	0.480421	0.0976377	0.109125	0.229825	0.638603	0.170675	0.289754	False	False		Abcd1	0.909358	0.0412649	-0.0287083	0.00391693	0.77034	0.113317	-0.265262	0.0737149	False	False		Cd46	0.449336	0.0269032	0.22521	0.884076	0.115346	0.85749	False	False
ANKRD62_-_12094120.23-P1P2|ANKRD62_-_12094092.23-P1P2	ANKRD62	0.774635	0.110903	-0.106351	0.027439	0.661143	0.179704	0.105227	0.0502705	False	False		Abcd2	0.4882	0.311402	0.182599	0.188008	0.976188	0.0104665	-0.00828554	0.00021267	False	False		Cd5	1.12824	-0.0869959	1.82858	0.871437	0.0999038	0.732077	False	False
ANKRD63_+_40575241.23-P1P2|ANKRD63_-_40575214.23-P1P2	ANKRD63	0.237737	0.623903	0.143788	0.208701	0.771427	0.112705	-0.114856	0.0344134	False	False		Abcd3	0.244839	0.61112	0.139481	0.281839	0.349163	0.456972	-0.530664	0.594693	False	False		Cd5l	0.585248	-0.0437437	0.476946	0.00680188	0.0115377	0.000659913	False	False
ANKRD65_-_1356630.23-P1|ANKRD65_+_1356462.23-P1	ANKRD65	0.148567	0.828076	-0.836568	1.61159	0.951002	0.0218185	-0.0563849	0.00327051	False	False		Abcd4	0.618044	0.208981	0.126199	0.0872007	0.0430601	1.36592	0.724136	2.42566	False	False		Cd70	1.0597	-0.112231	2.2157	0.285305	-0.0483563	0.116011	False	False
ANKRD65_+_1355480.23-P2|ANKRD65_-_1355292.23-P2	ANKRD65	0.0498593	1.30225	-0.892107	2.70269	0.0830589	1.08061	0.91367	2.62475	False	False		Abce1	0.00724189	2.14015	-1.7236	12.1965	0.00879065	2.05598	1.26858	6.39617	True	False		Cd79a	0.827238	-0.0612265	0.943591	0.629338	0.147469	0.780409	False	False
ANKRD66_-_46714675.23-P1P2|ANKRD66_-_46714684.23-P1P2	ANKRD66	0.0991031	1.00391	0.606236	1.41586	0.231402	0.635632	0.333888	0.564202	False	False		Abcf1	0.0790894	1.10188	-0.649466	2.36619	0.0909461	1.04122	0.660593	1.68678	False	False		Cd80	0.447471	0.0745701	0.621646	0.761406	-0.139451	0.892845	False	False
ANKRD7_-_117854724.23-P2|ANKRD7_-_117854746.23-P2	ANKRD7	0.441752	0.354822	-0.305922	0.252525	0.593213	0.226789	0.0729001	0.043952	False	False		Abcf2	0.687632	0.162644	-0.00588731	0.00316601	0.634757	0.197393	-0.162291	0.0785612	False	False		Cd86	0.165332	0.0141448	0.0435679	0.74959	0.124834	0.786858	False	False
ANKRD7_+_117864793.23-P1|ANKRD7_-_117864809.23-P1	ANKRD7	0.160618	0.794207	0.3185	0.588473	0.152142	0.817751	0.102586	0.223017	False	False		Abcf3	0.589904	0.229219	0.250285	0.189689	0.32966	0.481934	-0.490073	0.579205	False	False		Cd9	1.25968	-0.0989297	2.32167	0.804619	0.37674	2.549	False	False
ANKRD9_-_102976042.23-P1P2|ANKRD9_+_102976027.23-P1P2	ANKRD9	0.0759397	1.11953	-0.278492	0.725325	0.148855	0.827235	0.153982	0.338631	False	False		Abcg1	0.646756	0.18926	-0.143217	0.0896211	0.264409	0.577725	0.397539	0.563228	False	False		Cda	0.363126	0.0391177	0.264633	0.0452595	-0.065238	0.0248284	False	False
ANKS1A_+_34857078.23-P1P2|ANKS1A_+_34857121.23-P1P2	ANKS1A	0.988226	0.00514382	-0.191128	0.00228714	0.0183288	1.73687	-0.657418	3.03554	False	False		Abcg2	0.220325	0.656937	-0.223656	0.485805	0.948919	0.0227709	-0.190801	0.0106548	False	False		Cdan1	2.62144	-0.154741	7.55715	0.56527	0.144081	0.684861	True	False
ANKS1B_+_100378180.23-ENST00000329257.7,ENST00000547776.2|ANKS1B_+_100377870.23-ENST00000329257.7,ENST00000547776.2	ANKS1B	0.893543	0.0488848	-0.228883	0.0260297	0.104225	0.982028	0.217423	0.567621	False	False		Abcg3	0.649865	0.187177	0.340363	0.210646	0.851014	0.0700635	-0.262203	0.045052	False	False		Cdc123	0.961983	-0.156574	2.80608	0.187191	0.12215	0.192271	False	False
ANKS3_+_4784206.23-P1P2|ANKS3_+_4784180.23-P1P2	ANKS3	0.0319397	1.49567	-0.940549	3.27266	0.175436	0.75588	-0.793289	1.59409	False	False		Abcg4	0.229966	0.638336	-0.315424	0.665736	0.979091	0.00917681	-0.0128863	0.000290005	False	False		Cdc14a	0.993192	-0.0926958	1.71517	0.134437	-0.00131659	0.00148836	False	False
ANKS4B_+_21245002.23-P1P2|ANKS4B_-_21245045.23-P1P2	ANKS4B	0.561119	0.250945	0.11869	0.0692911	0.927989	0.0324571	-0.0644279	0.00555919	False	False		Abcg5	0.280413	0.552202	-0.657666	1.20077	0.904964	0.0433686	-0.127075	0.0135151	False	False		Cdc14b	0.75175	0.0752322	1.05364	1.76607	-0.288584	4.28567	False	False
ANKS6_+_101558408.23-P1P2|ANKS6_-_101558384.23-P1P2	ANKS6	0.660909	0.179859	-0.124209	0.0519717	0.284103	0.546524	0.237441	0.344979	False	False		Abcg8	0.224696	0.648405	-0.3273	0.701697	0.883087	0.0539965	-0.171245	0.0226761	False	False		Cdc16	1.01161	-0.166204	3.13234	0.296171	-0.0503822	0.125475	False	False
ANKUB1_-_149510608.23-ENST00000446160.1|ANKUB1_-_149510259.23-ENST00000446160.1	ANKUB1	0.125719	0.9006	0.0683543	0.143213	0.0287115	1.54194	-0.812115	3.329	False	False		Abhd10	0.682337	0.166001	-0.117924	0.0647247	0.169521	0.770777	0.137944	0.260745	False	False		Cdc20	1.53705	-0.146803	4.20375	0.345757	-0.132897	0.386389	False	False
ANKZF1_+_220094583.23-P1P2|ANKZF1_+_220094518.23-P1P2	ANKZF1	0.0320826	1.49373	-1.71353	5.95453	0.840198	0.0756186	-0.210577	0.0423318	False	False		Abhd11	0.919647	0.0363786	-0.169324	0.0203668	0.122564	0.911636	-0.60783	1.3589	False	False		Cdc23	3.59629	-0.255005	17.0851	0.279747	0.141536	0.332944	True	False
ANO1_-_69924499.23-P1P2|ANO1_-_69924717.23-P1P2	ANO1	0.120169	0.920207	-0.609575	1.30496	0.428651	0.367896	0.154975	0.15157	False	False		Abhd12	0.860439	0.06528	-0.235055	0.0507349	0.79382	0.100278	0.0836293	0.0205659	False	False		Cdc25a	0.00306089	-0.00764585	0.000436001	0.85638	-0.226196	1.62888	False	False
ANO10_-_43663459.23-P1P2|ANO10_-_43663456.23-P1P2	ANO10	0.00485527	2.31379	0.332904	1.79195	0.456407	0.340648	0.162246	0.146929	False	False		Abhd12b	0.50049	0.300605	0.180838	0.17974	0.0304368	1.5166	0.53503	1.98991	False	False		Cdc25b	0.392888	-0.0434586	0.318096	0.0153185	-0.0140466	0.00180936	False	False
ANO2_-_6054389.23-P1P2|ANO2_+_6054306.23-P1P2	ANO2	0.182943	0.737685	-0.522273	0.896298	0.589968	0.229171	0.133118	0.081101	False	False		Abhd13	0.506926	0.295055	0.0958533	0.0935122	0.312967	0.504501	0.793739	0.982027	False	False		Cdc25c	0.058435	-0.00697269	0.00759079	0.0328365	-0.0640026	0.0176723	False	False
ANO3_+_26353776.23-P1P2|ANO3_-_26353758.23-P1P2	ANO3	0.067848	1.16846	0.220633	0.599748	0.0193235	1.71392	0.19521	0.889448	False	False		Abhd14a	0.901937	0.0448239	-0.384172	0.0569368	0.535086	0.271576	0.211315	0.140736	False	False		Cdc26	0.359679	0.0560148	0.375346	1.16595	-0.203145	1.9917	False	False
ANO4_+_101188701.23-P1P2|ANO4_+_101188698.23-P1P2	ANO4	0.0713262	1.14675	-0.0253904	0.0677363	0.11949	0.922669	-0.182715	0.448176	False	False		Abhd14b	0.0604129	1.21887	0.376805	1.51856	0.598647	0.222829	-0.243565	0.133098	False	False		Cdc27	3.10756	-0.197956	11.4604	0.354459	-0.136755	0.407612	True	False
ANO5_-_22214662.23-P1P2|ANO5_-_22214643.23-P1P2	ANO5	0.248149	0.605287	-0.813908	1.14609	0.0192288	1.71605	-1.09237	4.98342	False	False		Abhd15	0.439004	0.357532	-0.121809	0.143997	0.45951	0.337705	-0.120763	0.100012	False	False		Cdc34	0.301228	-0.0371993	0.208758	0.914747	0.180421	1.3878	False	False
ANO6_-_45609917.23-P1P2|ANO6_-_45609946.23-P1P2	ANO6	0.408618	0.388682	0.184206	0.166564	0.815243	0.0887128	-0.127752	0.0301287	False	False		Abhd16a	0.00928966	2.032	-0.88587	5.95184	0.900928	0.0453098	0.167754	0.0186401	False	False		Cdc37	0.675055	-0.187693	2.36048	0.87901	0.20747	1.53351	False	False
ANO7_+_242157675.23-P1P2|ANO7_+_242157714.23-P1P2	ANO7	0.00818809	2.08682	-0.855937	4.15537	0.377263	0.423355	0.316359	0.356052	False	False		Abhd16b	0.487296	0.312207	-0.21927	0.226349	0.980253	0.00866198	0.0548877	0.00116594	False	False		Cdc37l1	0.961983	-0.0769149	1.37845	0.347247	0.0710473	0.207455	False	False
ANO8_-_17445166.23-P1P2|ANO8_-_17445502.23-P1P2	ANO8	0.0293413	1.53252	-1.95313	6.96341	0.404631	0.39294	-1.17688	1.22938	False	False		Abhd17a	0.55028	0.259416	-0.335895	0.28811	0.401251	0.396584	0.379491	0.36908	False	False		Cdc42	0.25236	0.017324	0.0814482	1.23394	0.185866	1.92855	False	False
ANO9_+_441993.23-P1P2|ANO9_+_441978.23-P1P2	ANO9	0.0325763	1.4871	0.278328	0.962899	0.769214	0.113953	0.00409302	0.00123993	False	False		Abhd17b	0.985053	0.00654043	-0.467329	0.0101062	0.116006	0.935521	0.845503	1.93978	False	False		Cdc42bpa	0.113957	-0.0126612	0.0268799	0.390021	-0.0674176	0.221106	False	False
ANP32A_-_69112836.23-P1P2|ANP32A_-_69113252.23-P1P2	ANP32A	0.0574957	1.24036	0.178386	0.514746	0.0748664	1.12571	-0.39983	1.19655	False	False		Abhd17c	0.00400332	2.39758	0.58833	4.66392	0.763114	0.117411	-0.166877	0.0480493	False	False		Cdc42bpb	0.107659	0.00890068	0.017852	0.38641	-0.0944658	0.306946	False	False
ANP32B_+_100745631.23-P1P2|ANP32B_-_100745885.23-P1P2	ANP32B	0.0265666	1.57566	-0.41129	1.50763	0.936726	0.0283872	-0.0214791	0.00162094	False	False		Abhd2	0.791993	0.101279	-0.861969	0.288647	0.887111	0.0520221	-0.107448	0.0137079	False	False		Cdc42bpg	0.576977	-0.0482452	0.518592	0.219588	0.0109665	0.0202495	False	False
ANP32D_-_48866393.23-P1P2|ANP32D_-_48866604.23-P1P2	ANP32D	0.118895	0.924838	-0.0505855	0.108837	0.771617	0.112598	0.105431	0.0315593	False	False		Abhd3	0.880863	0.0550917	-0.00392423	0.000714824	0.294488	0.530933	-0.365225	0.475537	False	False		Cdc42se2	0.87359	-0.0730121	1.18827	0.0568245	-0.0683626	0.0326657	False	False
ANP32E_+_150208436.23-P1P2|ANP32E_-_150208476.23-P1P2	ANP32E	0.2707	0.567512	-0.0195292	0.0257836	0.630977	0.199986	-0.161684	0.0859598	False	False		Abhd4	0.5551	0.255629	0.125961	0.106464	0.26597	0.575168	0.0309976	0.0437226	False	False		Cdc45	3.77756	-0.37112	26.118	0.00761908	0.0567494	0.00363582	True	False
ANPEP_-_90349821.23-P2|ANPEP_-_90349839.23-P2	ANPEP	0.178142	0.749234	0.3072	0.535454	0.636894	0.195933	-0.286643	0.149306	False	False		Abhd5	0.581973	0.235097	0.0453448	0.0352478	0.175708	0.755209	-0.684844	1.26836	False	False		Cdc5l	0.473852	0.045327	0.400142	0.721566	-0.23964	1.45403	False	False
ANPEP_+_90358037.23-P1|ANPEP_-_90358028.23-P1	ANPEP	0.214925	0.667713	0.0976522	0.151689	0.437215	0.359305	0.131653	0.125754	False	False		Abhd6	0.341171	0.467028	0.346495	0.535054	0.957617	0.0188082	-0.0456538	0.00210576	False	False		Cdc6	3.84415	-0.395334	28.3125	2.11272	0.263131	4.67468	True	False
ANTXR1_+_69240562.23-P1P2|ANTXR1_+_69240935.23-P1P2	ANTXR1	0.629622	0.20092	-0.0282104	0.0131861	0.654195	0.184293	0.231887	0.113609	False	False		Abhd8	0.808139	0.0925138	-0.0358977	0.0109807	0.480086	0.318681	-0.154158	0.120478	False	False		Cdc7	0.065372	0.00825547	0.0100542	1.18623	-0.169559	1.69133	False	False
ANTXR2_-_80994347.23-P1P2|ANTXR2_+_80994354.23-P1P2	ANTXR2	0.256354	0.591159	0.00430347	0.00591844	0.488938	0.310746	0.0207793	0.0171658	False	False		Abi1	0.0608371	1.21583	-0.527617	2.12104	0.105647	0.976145	0.584276	1.39867	False	False		Cdc73	0.286762	-0.0104236	0.055687	0.250243	0.0370602	0.0779844	False	False
ANXA1_-_75766840.23-P1P2|ANXA1_+_75766778.23-P1P2	ANXA1	0.750897	0.12442	-0.13333	0.0385923	0.888377	0.0514026	-0.0612165	0.0083653	False	False		Abi2	0.152837	0.815772	-1.13279	3.05546	0.974995	0.0109975	0.0742112	0.00200145	False	False		Cdca2	0.134321	0.0311446	0.0779361	1.08892	-0.136743	1.2521	False	False
ANXA10_+_169013714.23-P1P2|ANXA10_-_169013780.23-P1P2	ANXA10	0.0779345	1.10827	0.384894	0.992364	0.647444	0.188798	-0.266309	0.133663	False	False		Abi3	0.464997	0.33255	-0.206316	0.226854	0.066031	1.18025	-1.06342	3.07797	False	False		Cdca3	0.477334	0.0325382	0.289355	0.252071	0.0425398	0.0901688	False	False
ANXA11_-_81965250.23-P1P2|ANXA11_-_81965296.23-P1P2	ANXA11	0.288079	0.540488	0.141378	0.177767	0.0100406	1.99824	0.465122	2.47083	False	False		Abi3bp	0.143148	0.844216	0.520939	1.45411	0.783733	0.105832	-0.0430176	0.0111647	False	False		Cdca5	3.85445	-0.402447	28.8991	1.50626	-0.259516	3.28703	True	False
ANXA13_+_124749624.23-P1P2|ANXA13_+_124749651.23-P1P2	ANXA13	0.264698	0.577249	0.306905	0.412145	0.328516	0.483444	-0.43928	0.564568	False	False		Abl1	0.323564	0.49004	0.230503	0.373479	0.726757	0.138611	0.148953	0.0506326	False	False		Cdca8	1.76806	-0.403199	13.281	0.598391	0.220793	1.11099	True	False
ANXA2_-_60690116.23-P1P2|ANXA2_-_60690106.23-P1P2	ANXA2	0.372151	0.429281	0.0407593	0.0407054	0.372776	0.428552	0.209653	0.238855	False	False		Abl2	0.767117	0.115139	-0.13279	0.0505525	0.46483	0.332706	0.212769	0.173602	False	False		Cdh1	0.0403756	0.011248	0.00846075	0.296758	0.0859547	0.214492	False	False
ANXA2R_-_43040242.23-P1P2|ANXA2R_-_43040188.23-P1P2	ANXA2R	0.201754	0.695179	0.0356929	0.0577248	0.743518	0.128708	-0.111954	0.0383067	False	False		Ablim1	0.474738	0.323546	0.244737	0.261814	0.904387	0.0436455	0.139112	0.0148898	False	False		Cdh11	0.504717	-0.0517955	0.487027	0.216586	-0.0750966	0.136769	False	False
ANXA3_+_79472940.23-P1P2|ANXA3_-_79472946.23-P1P2	ANXA3	0.767727	0.114793	-0.127589	0.0340733	0.931929	0.0306172	-0.0581149	0.00473022	False	False		Ablim2	0.7095	0.149047	-0.0545371	0.0268766	0.0836767	1.0774	-0.628084	1.6595	False	False		Cdh13	0.430818	-0.0462163	0.370939	1.4015	-0.217528	2.56359	False	False
ANXA4_-_69969324.23-P1P2|ANXA4_+_69969241.23-P1P2	ANXA4	0.0149837	1.82438	-3.98389	16.9085	0.20327	0.691926	-3.76469	6.92496	True	False		Ablim3	0.971835	0.0124076	-0.662232	0.0271678	0.801689	0.0959941	-0.100483	0.0236549	False	False		Cdh2	0.893449	-0.0772618	1.28602	0.0142451	0.118687	0.014217	False	False
ANXA5_-_122618118.23-P1P2|ANXA5_-_122618086.23-P1P2	ANXA5	0.513046	0.289843	0.0810582	0.0546567	0.831078	0.0803583	-0.13486	0.0288099	False	False		Abo	0.961495	0.0170528	-0.0383746	0.00216371	0.337302	0.471982	0.222459	0.257489	False	False		Cdh4	0.805681	-0.0598195	0.897884	0.455189	0.0537476	0.205726	False	False
ANXA6_-_150537278.23-P1P2|ANXA6_+_150537317.23-P1P2	ANXA6	0.574191	0.240944	0.0194259	0.0108888	0.271005	0.567022	0.290545	0.437967	False	False		Abr	0.918504	0.0369192	0.0045179	0.000551501	0.557357	0.253867	0.116304	0.0724078	False	False		Cdh5	0.22482	0.0103584	0.0433851	0.187392	-0.0264589	0.0416927	False	False
ANXA7_+_75173793.23-P1P2|ANXA7_-_75173729.23-P1P2	ANXA7	0.0151084	1.82078	-2.40742	10.1975	0.270287	0.568174	-1.49557	2.25901	True	False		Abra	0.865537	0.0627146	0.0939581	0.0194832	0.377198	0.42343	-0.305983	0.317734	False	False		Cdip1	1.55326	-0.137138	3.9684	0.506047	0.280672	1.19434	False	False
ANXA9_-_150954803.23-P1P2|ANXA9_+_150954830.23-P1P2	ANXA9	0.30319	0.518285	-0.460218	0.554901	0.655779	0.183242	0.0692448	0.0337319	False	False		Abracl	0.836729	0.0774151	0.0946235	0.0242204	0.30638	0.513739	0.128135	0.161433	False	False		Cdipt	0.462474	-0.0123192	0.106141	0.468675	-0.0933706	0.367977	False	False
AOAH_-_36764004.23-P1P2|AOAH_-_36764000.23-P1P2	AOAH	0.0480655	1.31817	-0.562703	1.72557	0.56474	0.248151	-0.345783	0.228112	False	False		Abt1	0.34447	0.462848	-0.50808	0.777549	0.348414	0.457905	-0.252084	0.283077	False	False		Cdk1	0.44004	-0.0633799	0.519586	0.182879	-0.0566971	0.0871892	False	False
AOC1_-_150549631.23-P1|AOC1_-_150549683.23-P1	AOC1	0.294149	0.531432	0.042916	0.053058	0.42608	0.370509	-0.38414	0.378371	False	False		Abtb1	0.892245	0.049516	0.0227993	0.00373271	0.0253712	1.59566	-1.19925	4.69283	False	False		Cdk10	0.250829	-0.0272359	0.127272	0.899352	-0.148748	1.12492	False	False
AOC1_-_150553650.23-P2|AOC1_+_150553853.23-P2	AOC1	0.0100966	1.99582	0.274668	1.27531	0.314721	0.502074	-0.203263	0.271303	False	False		Abtb2	0.943131	0.0254279	-0.327655	0.0275477	0.869888	0.0605368	-0.237821	0.0353063	False	False		Cdk11b	0.320874	-0.13141	0.785555	0.90447	0.124669	0.948177	False	False
AOC2_+_40996638.23-P1P2|AOC2_+_40996660.23-P1P2	AOC2	0.625497	0.203775	-0.0858715	0.0407083	0.511986	0.290742	-0.145295	0.112302	False	False		Acaa1a	0.920792	0.0358387	-0.0790888	0.00937183	0.216402	0.664739	-0.62712	1.02232	False	False		Cdk12	1.54029	-0.156904	4.50246	0.290196	-0.0801911	0.195684	False	False
AOC3_+_41003290.23-P1P2|AOC3_-_41003258.23-P1P2	AOC3	0.00404521	2.39306	0.388698	2.16396	0.388538	0.410567	-0.299814	0.327238	False	False		Acaa1b	0.9977	0.000999888	-0.313123	0.0010352	0.52602	0.278997	-0.00181234	0.00124001	False	False		Cdk13	0.0304955	0.0031317	0.00177922	1.30538	0.172612	1.89472	False	False
AOX1_+_201450796.23-P1|AOX1_-_201450834.23-P1	AOX1	0.155792	0.807456	-1.18983	2.23504	0.946103	0.0240614	-0.0683553	0.00437242	False	False		Acaa2	0.0650924	1.18647	0.444183	1.74251	0.852726	0.0691905	-0.326546	0.0554083	False	False		Cdk14	0.0370601	-0.00434208	0.0029979	0.308357	-0.00414777	0.0107549	False	False
AOX1_+_201474091.23-P2|AOX1_+_201474232.23-P2	AOX1	0.133954	0.873045	0.332192	0.674697	0.213553	0.670494	-0.533239	0.950485	False	False		Acaca	0.195625	0.708576	-0.499828	1.17102	0.788211	0.103357	0.122054	0.0309368	False	False		Cdk15	0.171938	0.0184052	0.058956	0.116865	0.0126991	0.0124795	False	False
AP1AR_-_113152975.23-P1P2|AP1AR_-_113152987.23-P1P2	AP1AR	0.0494935	1.30545	0.268227	0.814606	0.518647	0.285128	-0.177126	0.134262	False	False		Acacb	0.709387	0.149117	0.365047	0.179983	0.915389	0.0383942	-0.118972	0.0112019	False	False		Cdk16	0.66846	0.0429899	0.535371	0.0110401	0.047366	0.00439722	False	False
AP1B1_+_29784481.23-P1P2|AP1B1_+_29784492.23-P1P2	AP1B1	0.412132	0.384964	-0.097983	0.0877515	0.361535	0.44185	0.166266	0.195301	False	False		Acad10	0.533574	0.272806	0.0144492	0.0130333	0.175012	0.756932	-1.05983	1.96733	False	False		Cdk17	0.335878	0.0140688	0.0880341	0.0556563	-0.0234456	0.0109727	False	False
AP1G1_-_71842702.23-P1P2|AP1G1_-_71842491.23-P1P2	AP1G1	0.826283	0.0828713	-0.130262	0.0251135	0.216058	0.66543	-0.663036	1.17292	False	False		Acad11	0.67864	0.16836	0.0967169	0.0538394	0.647536	0.188736	0.1263	0.0584577	False	False		Cdk18	0.17083	0.0269072	0.0856341	0.638098	0.0907787	0.48709	False	False
AP1G2_+_24036742.23-P1P2|AP1G2_+_24036800.23-P1P2	AP1G2	0.256918	0.590205	-0.34173	0.469212	0.0715847	1.14518	0.62163	1.89249	False	False		Acad12	0.767117	0.115139	-0.0898729	0.0342142	0.448539	0.3482	0.207201	0.176931	False	False		Cdk19	0.135858	-0.020239	0.0512256	2.03745	-0.215777	3.69684	False	False
AP1M1_+_16308778.23-P1P2|AP1M1_-_16308748.23-P1P2	AP1M1	0.456541	0.340521	-0.389469	0.308532	0.90796	0.0419334	0.00184214	0.000205358	False	False		Acad8	0.451895	0.344963	-0.231582	0.26414	0.0737791	1.13207	0.449807	1.24877	False	False		Cdk2	1.23632	-0.0872065	2.0086	0.0640476	-0.00126567	0.000681649	False	False
AP1M2_-_10697754.23-P1P2|AP1M2_-_10697911.23-P1P2	AP1M2	0.08728	1.05909	-1.32395	3.26201	0.403097	0.39459	0.367792	0.385813	False	False		Acad9	0.247059	0.607199	0.234781	0.471358	0.0176164	1.75408	1.03759	4.46333	False	False		Cdk20	0.25236	0.0280003	0.131643	0.0591687	0.0532783	0.0265082	False	False
AP1S1_-_100797802.23-P1P2|AP1S1_-_100797757.23-P1P2	AP1S1	0.184096	0.734955	0.0412638	0.0705527	0.794156	0.100094	0.0675316	0.0179699	False	False		Acadl	0.149553	0.825204	-1.38096	3.76791	0.0766745	1.11535	0.825009	2.25659	False	False		Cdk2ap1	0.084315	-0.00592636	0.00930908	0.829086	-0.258041	1.79898	False	False
AP1S2_-_15872939.23-P1P2|AP1S2_-_15872932.23-P1P2	AP1S2	0.000634105	3.19784	-0.741692	5.51777	0.258317	0.587847	0.666693	1.04188	False	False		Acadm	0.906503	0.0426308	-0.351392	0.0495305	0.458627	0.33854	0.257293	0.21361	False	False		Cdk4	2.07481	-0.115141	4.45065	0.33713	-0.103632	0.293784	False	False
AP1S3_-_224702252.23-P1P2|AP1S3_-_224702284.23-P1P2	AP1S3	0.0395952	1.40236	0.354245	1.1557	0.346725	0.460015	0.153834	0.188127	False	False		Acads	0.0412176	1.38492	-0.364708	1.67004	0.144787	0.83927	0.723634	1.48938	False	False		Cdk5	1.15622	0.066817	1.43927	0.282059	-0.0779611	0.184908	False	False
AP2A1_-_50270622.23-P1P2|AP2A1_+_50270300.23-P1P2	AP2A1	0.0086153	2.06473	-4.66882	22.4261	0.752894	0.123266	-0.371892	0.121868	True	False		Acadsb	0.878021	0.0564951	0.0586586	0.0109572	0.889987	0.0506165	-0.180862	0.0224504	False	False		Cdk5r1	0.26627	0.0364374	0.180752	0.10317	-0.0371427	0.0322229	False	False
AP2A2_-_925877.23-P1P2|AP2A2_+_925897.23-P1P2	AP2A2	0.461916	0.335437	0.0853723	0.066621	0.483379	0.315713	-0.294948	0.247551	False	False		Acadvl	0.552205	0.257899	-0.097807	0.0834023	0.557357	0.253867	0.100246	0.0624101	False	False		Cdk5r2	0.340931	-0.00997364	0.0633481	0.434302	-0.16284	0.594691	False	False
AP2B1_-_33914780.23-P1P2|AP2B1_-_33914544.23-P1P2	AP2B1	0.014581	1.83621	-2.63754	11.2669	0.00226112	2.64568	-1.36456	9.59746	True	False		Acan	0.0897139	1.04714	0.208747	0.722741	0.979091	0.00917681	-0.14779	0.00332599	False	False		Cdk5rap2	1.67913	-0.147843	4.62485	0.510047	0.134108	0.575177	False	False
AP2M1_-_183892660.23-P1|AP2M1_-_183892679.23-P1	AP2M1	0.0104955	1.979	-4.75273	21.8812	0.142569	0.845975	-4.92161	11.0686	True	True		Acap1	0.210189	0.67739	0.296164	0.663328	0.0466308	1.33133	0.467298	1.52568	False	False		Cdk6	0.868657	-0.0723343	1.17059	0.1425	-0.041035	0.0491709	False	False
AP2M1_+_183894722.23-P2|AP2M1_+_183894728.23-P2	AP2M1	0.474726	0.323557	-0.500186	0.376501	0.444957	0.351682	-0.214806	0.200828	False	False		Acap2	0.782569	0.106477	-0.173812	0.061192	0.59612	0.224666	0.776488	0.427815	False	False		Cdk7	1.84156	-0.104875	3.59809	0.573647	0.0623171	0.300601	False	False
AP2S1_-_47354086.23-P1P2|AP2S1_-_47354099.23-P1P2	AP2S1	0.0986471	1.00592	-7.35536	17.2127	0.547181	0.261869	1.12529	0.78339	True	False		Acap3	0.518381	0.285351	0.240131	0.226561	0.161547	0.791702	-0.484601	0.94087	False	False		Cdk8	0.32253	0.0430777	0.258843	0.065075	-0.0246486	0.0134879	False	False
AP3B1_-_77590315.23-P1P2|AP3B1_-_77590427.23-P1P2	AP3B1	0.00326428	2.48621	-1.86504	10.7872	0.419502	0.377266	0.0756839	0.0759065	True	False		Acat1	0.35113	0.454532	0.182848	0.274797	0.00615359	2.21087	-0.834613	4.52514	False	False		Cdk9	0.570805	-0.0411868	0.437985	0.50206	0.107042	0.451905	False	False
AP3B2_-_83378565.23-P1P2|AP3B2_+_83378423.23-P1P2	AP3B2	0.38886	0.410207	-0.579299	0.552828	0.599404	0.22228	-0.295869	0.174835	False	False		Acat2	0.0426703	1.36987	-0.430813	1.95131	0.941965	0.0259653	-0.0589719	0.00375511	False	False		Cdkl1	0.644516	0.062707	0.752946	0.00574858	-0.0068187	0.00032961	False	False
AP3D1_-_2151147.23-P1P2|AP3D1_-_2151563.23-P1P2	AP3D1	0.0431973	1.36454	-9.67109	30.7006	0.513768	0.289233	-2.13572	1.64218	True	False		Acat3	0.559456	0.252234	-0.0691305	0.0576542	0.751485	0.12408	-0.104932	0.0319294	False	False		Cdkl2	0.502765	0.037703	0.353146	0.300057	0.0879689	0.221958	False	False
AP3M1_+_75910607.23-P1P2|AP3M1_+_75910525.23-P1P2	AP3M1	0.0685564	1.16395	-0.463731	1.2557	0.14652	0.834103	0.303968	0.674024	False	False		Acbd3	0.0181775	1.74046	-0.850582	4.89484	0.574102	0.241011	0.526251	0.311038	False	False		Cdkl3	0.508629	0.0243035	0.230294	0.200278	0.0341792	0.0575615	False	False
AP3M2_-_42010600.23-P1P2|AP3M2_-_42010635.23-P1P2	AP3M2	0.160222	0.795279	0.324816	0.600954	0.376191	0.424592	-0.354067	0.399655	False	False		Acbd4	0.527434	0.277832	-0.0937676	0.0861375	0.324271	0.489092	-0.610972	0.732816	False	False		Cdkl4	1.12546	-0.0594951	1.24745	1.2481	0.201815	2.11808	False	False
AP3S1_+_115177971.23-P1P2|AP3S1_+_115178026.23-P1P2	AP3S1	0.010541	1.97712	-2.5201	11.5914	0.938957	0.0273545	-0.0780536	0.00567609	True	False		Acbd5	0.315854	0.500513	-0.220742	0.365307	0.970963	0.0127972	-0.311299	0.00976962	False	False		Cdkl5	0.394665	0.0278524	0.204788	0.104441	-0.0438916	0.0385472	False	False
AP4B1_-_114447335.23-P1P2|AP4B1_+_114447589.23-P1P2	AP4B1	0.796325	0.0989096	-0.131136	0.0301747	0.181582	0.740927	-0.55802	1.09914	False	False		Acbd6	0.150574	0.822251	-0.512179	1.39246	0.607272	0.216617	0.14904	0.0791732	False	False		Cdkn1a	3.25221	0.16967	10.2801	1.34219	-0.170615	1.92562	True	False
AP4E1_-_51200948.23-P1P2|AP4E1_-_51200945.23-P1P2	AP4E1	0.200358	0.698193	0.17153	0.278612	0.497733	0.303004	0.0555031	0.0447089	False	False		Acbd7	0.970111	0.0131785	-0.19494	0.00849426	0.985479	0.00635254	-0.0028263	4.40301e-05	False	False		Cdkn1b	1.30703	-0.0774796	1.88662	0.0418405	-0.0177017	0.00622802	False	False
AP4M1_+_99699365.23-P1P2|AP4M1_+_99699307.23-P1P2	AP4M1	0.0417975	1.37885	-3.64801	11.7019	0.615564	0.210727	-1.62237	0.908859	True	False		Accs	0.766567	0.11545	0.0748268	0.0285634	0.273871	0.562454	-0.471348	0.650149	False	False		Cdkn1c	0.646678	0.0863823	1.0407	0.0686503	-0.0404537	0.0233528	False	False
AP4S1_+_31495279.23-P1P2|AP4S1_+_31495234.23-P1P2	AP4S1	0.030712	1.51269	-2.1991	7.73889	0.443538	0.35307	-1.04427	0.980169	False	False		Accsl	0.549799	0.259796	0.198816	0.170782	0.219393	0.658778	-0.57861	0.934778	False	False		Cdkn2a	3.91653	0.270029	19.7027	2.34058	-0.233252	4.59078	True	False
AP5B1_+_65548161.23-P1P2|AP5B1_+_65548202.23-P1P2	AP5B1	0.674749	0.170858	-0.226937	0.0902038	0.203	0.692504	0.690243	1.27073	False	False		Acd	0.0254539	1.59425	-2.71083	14.2894	0.713795	0.146426	0.220421	0.0791507	True	False		Cdkn2b	0.749443	0.0463541	0.647202	0.993528	-0.112684	0.941416	False	False
AP5M1_-_57735937.23-P1P2|AP5M1_-_57735787.23-P1P2	AP5M1	0.0784531	1.10539	-1.36959	3.522	0.195862	0.70805	-0.586489	1.10396	False	False		Ace	0.639011	0.194492	-0.0729069	0.0468843	0.592089	0.227613	-0.0741787	0.0414057	False	False		Cdkn2c	0.34941	0.0249976	0.162722	0.156159	-0.104172	0.136791	False	False
AP5S1_-_3801224.23-P1P2|AP5S1_+_3801197.23-P1P2	AP5S1	0.164957	0.78263	0.188901	0.343934	0.608112	0.216017	0.168376	0.0966931	False	False		Ace2	0.023575	1.62755	0.492325	2.64938	0.0395834	1.40249	-0.715112	2.45956	False	False		Cdkn2d	0.253894	-0.0230968	0.109249	0.0196371	-0.0345995	0.00571328	False	False
AP5Z1_-_4815293.23-P1P2|AP5Z1_-_4815338.23-P1P2	AP5Z1	0.68208	0.166165	-0.270574	0.104594	0.177345	0.751182	-0.549802	1.09794	False	False		Ace3	0.10952	0.960507	0.272797	0.866357	0.562257	0.250065	-0.194426	0.119231	False	False		Cdkn3	0.491119	-0.0341105	0.312096	0.130443	-0.0183363	0.0201128	False	False
APAF1_-_99039085.23-P1P2|APAF1_-_99039071.23-P1P2	APAF1	0.259657	0.5856	0.0191256	0.0260555	0.176893	0.75229	0.302645	0.605266	False	False		Acer1	0.261596	0.582368	0.191379	0.368509	0.182778	0.738075	-0.688809	1.24676	False	False		Cdo1	0.371792	-0.0366829	0.254084	0.804619	0.0887183	0.600263	False	False
APBA1_+_72287177.23-P1P2|APBA1_+_72287235.23-P1P2	APBA1	0.0288743	1.53949	-4.26733	15.2833	0.351113	0.454553	-3.24593	3.9224	True	False		Acer2	0.639011	0.194492	0.328417	0.211195	0.915353	0.0384113	0.371237	0.0349699	False	False		Cdpf1	0.241698	0.0358387	0.161376	0.0674559	-0.0234644	0.0133097	False	False
APBA2_+_29131551.23-P1P2|APBA2_-_29131600.23-P1P2	APBA2	0.472177	0.325895	-0.325786	0.246998	0.305373	0.515169	0.270618	0.370624	False	False		Acer3	0.16107	0.792985	-1.90006	4.98183	0.309035	0.509993	-0.518937	0.649027	False	False		Cdr2	0.623073	0.0333466	0.387083	0.0174727	0.0443406	0.0065148	False	False
APBA3_+_3761594.23-P1P2|APBA3_+_3761583.23-P1P2	APBA3	0.912711	0.0396666	-0.142702	0.0131686	0.994813	0.00225851	-0.0349725	0.000209979	False	False		Ache	0.573602	0.241389	0.111828	0.0892538	0.695843	0.157489	-0.107678	0.0415874	False	False		Cdt1	0.065372	-0.062344	0.0759277	0.829086	-0.249025	1.73613	False	False
APBB1_-_6440248.23-P1P2|APBB1_-_6440251.23-P1P2	APBB1	0.302818	0.518818	0.0116929	0.014113	0.191975	0.716756	-0.387487	0.738342	False	False		Acin1	0.531208	0.274735	-0.253995	0.230726	0.616977	0.209731	0.114463	0.0588724	False	False		Cdx2	0.00821016	0.0115241	0.00176268	0.113418	-0.0783817	0.0747543	False	False
APBB1IP_+_26727301.23-P1P2|APBB1IP_+_26727562.23-P1P2	APBB1IP	0.126445	0.898097	0.290305	0.606542	0.990589	0.00410635	-0.0424998	0.00046395	False	False		Ackr2	0.945999	0.0241094	-0.0304925	0.00243073	0.0812337	1.09026	0.563905	1.50772	False	False		Cebpa	0.470048	-0.0103734	0.0908398	0.0868831	-0.0368997	0.0269585	False	False
APBB2_+_41216527.23-P1P2|APBB2_+_41216456.23-P1P2	APBB2	0.84508	0.0731024	-0.132506	0.0225346	0.31114	0.507044	0.297269	0.400705	False	False		Ackr3	0.861005	0.0649944	0.0336245	0.00722586	0.613393	0.212261	0.36922	0.192194	False	False		Cebpb	0.57904	-0.0158061	0.170509	0.212104	-0.0160786	0.028677	False	False
APBB3_+_139943875.23-P1P2|APBB3_-_139943965.23-P1P2	APBB3	0.466258	0.331374	-0.318129	0.245248	0.727736	0.138026	-0.120463	0.0442022	False	False		Ackr4	0.311701	0.506262	-0.549949	0.920568	0.109924	0.958908	-0.643049	1.51218	False	False		Cebpg	0.447471	0.057419	0.478668	0.152033	0.0860628	0.110025	False	False
APC_-_112073585.23-P1|APC_-_112073620.23-P1	APC	0.802351	0.0956354	-0.0559957	0.0124582	0.772487	0.112109	-0.187862	0.0559898	False	False		Acly	0.000506298	3.29559	-1.68864	18.4004	0.00935017	2.02918	2.2961	11.426	True	True		Cel	0.356244	0.0361246	0.239754	0.105716	0.0615054	0.0546753	False	False
APC_+_112043273.23-P2|APC_+_112043639.23-P2	APC	0.045909	1.3381	-1.03951	3.23594	0.840797	0.0753087	0.0670726	0.0134282	False	False		Acmsd	0.319857	0.495044	0.167894	0.274813	0.851785	0.0696702	0.00602084	0.0010287	False	False		Cela1	0.0359599	0.0161945	0.0108493	0.0579953	0.0140148	0.00683466	False	False
APC2_-_1446291.23-P2|APC2_-_1446345.23-P2	APC2	0.766299	0.115602	-0.117263	0.0315362	0.686143	0.163585	-0.109724	0.0477171	False	False		Acn9	0.380532	0.419609	0.110025	0.152648	0.50208	0.299227	0.332941	0.244316	False	False		Cela2a	0.389343	0.0296619	0.215152	0.476449	0.118087	0.473104	False	False
APC2_-_1450147.23-P1|APC2_+_1450166.23-P1	APC2	0.347251	0.459356	0.252944	0.270308	0.960665	0.0174282	-0.0224197	0.00103875	False	False		Acnat1	0.170982	0.76705	0.310866	0.788415	0.535566	0.271187	0.204766	0.136179	False	False		Cenpe	2.61299	-0.200336	9.75237	1.02419	0.182782	1.57418	True	False
APCDD1_-_10454694.23-P1P2|APCDD1_+_10454664.23-P1P2	APCDD1	0.045084	1.34598	0.258723	0.810135	0.424224	0.372405	-0.164007	0.16237	False	False		Acnat2	0.195625	0.708576	0.25084	0.587679	0.732229	0.135353	-0.0102108	0.0033893	False	False		Cenpf	0.058435	-0.00804364	0.00875668	0.974876	-0.197464	1.61873	False	False
APCDD1L_+_57090390.23-P1P2|APCDD1L_+_57090384.23-P1P2	APCDD1L	0.904995	0.0433539	-0.233369	0.0235372	0.464368	0.333138	-0.212648	0.188327	False	False		Aco1	0.855347	0.0678578	-0.37385	0.0838793	0.0562841	1.24961	-1.18052	3.61769	False	False		Cenpi	3.88542	-0.538077	38.9491	0.594769	0.143403	0.717208	True	False
APCS_+_159557645.23-P1P2|APCS_+_159557663.23-P1P2	APCS	0.284591	0.545778	0.109511	0.139046	0.108488	0.964617	-0.459497	1.17833	False	False		Aco2	0.355615	0.44902	-0.253546	0.376427	0.27547	0.559925	0.236774	0.325124	False	False		Cenpj	3.26639	-0.192036	11.686	2.2478	0.450337	8.51205	True	True
APEH_-_49711852.23-P1P2|APEH_+_49711858.23-P1P2	APEH	0.135374	0.868464	-0.909819	1.83819	0.947648	0.0233529	-0.00745913	0.000463082	False	False		Acot1	0.824928	0.0835837	-0.253949	0.070182	0.258227	0.587999	-0.444249	0.640599	False	False		Cenpl	1.325	-0.150007	3.7029	0.247791	-0.124704	0.25984	False	False
APEX1_-_20923425.23-P1P2|APEX1_+_20923418.23-P1P2	APEX1	0.063479	1.19737	-0.717722	1.99925	0.954642	0.0201594	-0.0593265	0.00317946	False	False		Acot10	0.236749	0.625712	0.0992948	0.205428	0.990706	0.00405504	0.212813	0.0021163	False	False		Cenpm	2.21994	-0.274319	11.3452	0.0475518	0.325352	0.130094	True	False
APEX2_+_55026846.23-P1P2|APEX2_+_55026814.23-P1P2	APEX2	0.156314	0.806003	-0.505941	0.94868	0.581983	0.23509	-0.245051	0.153151	False	False		Acot11	0.498659	0.302197	-0.179614	0.179469	0.536045	0.270799	0.52904	0.351333	False	False		Cenpn	3.8493	-0.361797	25.9454	0.268422	-0.0415337	0.0937469	True	False
APH1A_-_150241347.23-P1P2|APH1A_+_150241051.23-P1P2	APH1A	0.539233	0.268224	-0.140211	0.0874908	0.959105	0.018134	-0.0463863	0.0022362	False	False		Acot12	0.888258	0.0514607	-0.289763	0.0493033	0.993611	0.0027838	-0.253101	0.00172789	False	False		Cenpq	0.203278	0.0142921	0.0541252	0.161701	0.0457636	0.0622258	False	False
APH1B_-_63569831.23-P1P2|APH1B_+_63569877.23-P1P2	APH1B	0.467437	0.330277	0.0021596	0.00165934	0.0828973	1.08146	0.132146	0.379919	False	False		Acot13	0.695604	0.157638	0.0732869	0.0381984	0.921709	0.035406	-0.0647002	0.0056178	False	False		Cenpv	0.237169	0.00176905	0.00781652	0.0943438	0.108048	0.0857171	False	False
API5_-_43333564.23-P1P2|API5_-_43333590.23-P1P2	API5	0.0667017	1.17586	-0.335262	0.917116	0.547672	0.261479	0.167219	0.116239	False	False		Acot2	0.818913	0.0867624	0.0274523	0.0078753	0.247453	0.606508	0.286387	0.425965	False	False		Cep110	0.363126	-0.0407118	0.275417	0.573647	-0.1322	0.637696	False	False
APIP_-_34938012.23-P1P2|APIP_-_34937854.23-P1P2	APIP	0.123908	0.906899	0.0710085	0.149814	0.186322	0.729737	-0.611833	1.18694	False	False		Acot3	0.0838783	1.07635	-0.449304	1.59901	0.506262	0.295624	0.11684	0.0847063	False	False		Cep128	0.356244	-0.0637601	0.423166	1.16883	0.214741	2.1106	False	False
APLF_-_68694726.23-P1P2|APLF_+_68694742.23-P1P2	APLF	0.38592	0.413502	0.076845	0.0739226	0.21995	0.657677	-0.576638	1.00819	False	False		Acot4	0.681809	0.166337	-0.0779549	0.0428737	0.694229	0.158497	0.328072	0.127519	False	False		Cep135	0.0515881	-0.0161325	0.0155047	1.67188	0.142962	2.00986	False	False
APLN_+_128788911.23-P1P2|APLN_+_128788902.23-P1P2	APLN	0.0626214	1.20328	0.137944	0.386148	0.152361	0.817127	0.192717	0.418636	False	False		Acot5	0.790883	0.101888	0.0379751	0.0127932	0.247354	0.606681	-0.521419	0.775766	False	False		Cep152	0.342621	-0.0814221	0.51972	0.242471	0.15846	0.323086	False	False
APLNR_+_57004653.23-P1P2|APLNR_+_57004672.23-P1P2	APLNR	0.182984	0.737587	-0.0149196	0.0256008	0.784217	0.105564	0.0882194	0.0247575	False	False		Acot6	0.0245677	1.60964	0.568076	3.02337	0.711512	0.147818	-0.196406	0.0711977	False	False		Cep192	2.4266	-0.180031	8.13878	0.5282	0.30552	1.35699	True	False
APLP1_-_36359530.23-P1P2|APLP1_-_36359489.23-P1P2	APLP1	0.045297	1.34393	0.486661	1.52155	0.424515	0.372107	-0.300839	0.297598	False	False		Acot7	0.156487	0.805522	-0.367424	0.978593	0.832045	0.0798533	0.0252877	0.00495205	False	False		Cep250	0.274095	0.0326603	0.166777	0.542495	0.0526806	0.240317	False	False
APLP2_-_129939875.23-P1P2|APLP2_-_129939865.23-P1P2	APLP2	0.0739105	1.13129	0.178495	0.469769	0.686703	0.163231	0.120162	0.0521433	False	False		Acot8	0.71111	0.148063	-0.15851	0.0775999	0.0599494	1.22221	-0.705437	2.11441	False	False		Cep290	0.101426	-0.00169872	0.00320983	0.0844176	-0.0168649	0.0119717	False	False
APMAP_+_24973306.23-P1P2|APMAP_+_24973353.23-P1P2	APMAP	0.114209	0.942301	0.519336	1.13847	0.123134	0.909621	-0.782974	1.89337	False	False		Acot9	0.117234	0.930945	-0.307815	0.947483	0.730586	0.136329	0.0357383	0.0119483	False	False		Cep350	0.151775	-0.0781148	0.220876	0.0509437	0.0634232	0.0271692	False	False
APOA1_-_116708302.23-P1P2|APOA1_-_116708285.23-P1P2	APOA1	0.610169	0.21455	-0.077132	0.0384988	0.229504	0.639209	0.146445	0.248855	False	False		Acox1	0.636952	0.195893	0.0746777	0.048369	0.443759	0.352853	0.0769083	0.0665504	False	False		Cep41	0.219306	-0.027874	0.113884	0.0153185	0.00635213	0.000818224	False	False
APOA1BP_-_156561604.23-P1P2|APOA1BP_-_156561782.23-P1P2	APOA1BP	0.551177	0.258709	-0.390861	0.235243	0.28688	0.542299	0.497617	0.717401	False	False		Acox2	0.956328	0.0193932	0.0768946	0.00493063	0.616977	0.209731	-0.238005	0.122414	False	False		Cep55	0.508629	-0.186971	1.7717	0.213595	-0.0665851	0.119593	False	False
APOA2_+_161193373.23-P1P2|APOA2_+_161193370.23-P1P2	APOA2	0.00946588	2.02384	0.228637	1.07648	0.348012	0.458405	0.10078	0.122815	False	False		Acox3	0.260985	0.583385	0.0794913	0.153332	0.961098	0.0172325	0.035519	0.00150105	False	False		Cep57	0.0304955	-0.0341814	0.0194196	0.0807392	-0.013314	0.00903922	False	False
APOA4_+_116693985.23-P1P2|APOA4_+_116693941.23-P1P2	APOA4	0.00254613	2.59412	-1.8109	10.9287	0.287243	0.54175	0.702477	1.01172	True	False		Acoxl	0.271206	0.5667	-0.387065	0.725261	0.755355	0.121849	0.24432	0.0730071	False	False		Cep63	0.0723996	-0.0411053	0.0554431	0.161701	0.00158796	0.00215918	False	False
APOA5_+_116662572.23-P1P2|APOA5_+_116662545.23-P1P2	APOA5	0.258829	0.586986	0.307569	0.420005	0.38871	0.410375	-0.253518	0.276579	False	False		Acp1	0.0494194	1.3061	0.445595	1.92431	0.45291	0.343989	0.300952	0.253878	False	False		Cep68	0.131938	0.0308931	0.0759357	0.940673	0.0854488	0.6759	False	False
APOB_-_21266915.23-P1P2|APOB_-_21266941.23-P1P2	APOB	0.256128	0.591542	0.342197	0.470919	0.822962	0.08462	0.0102775	0.002312	False	False		Acp2	0.194383	0.711341	0.272325	0.640507	0.211571	0.674544	-0.390033	0.645201	False	False		Cep70	0.544378	0.0666531	0.675981	0.206168	-0.0674749	0.116977	False	False
APOBEC1_+_7818434.23-P1P2|APOBEC1_+_7818491.23-P1P2	APOBEC1	0.0891307	1.04997	0.0964493	0.235592	0.55174	0.258265	0.139582	0.0958352	False	False		Acp5	0.00767469	2.11494	-1.01518	7.09904	0.503008	0.298425	0.723881	0.529769	False	False		Cep72	0.203278	-0.0383827	0.145359	0.0229027	-0.00784986	0.00151177	False	False
APOBEC2_-_41021362.23-P1P2|APOBEC2_+_41021194.23-P1P2	APOBEC2	0.00312091	2.50572	-4.00782	23.3627	0.586376	0.231824	0.98573	0.607498	True	False		Acp6	0.138483	0.858602	-0.443371	1.25868	0.604221	0.218804	0.0556099	0.0298394	False	False		Cep76	1.2103	0.0648902	1.46314	0.684929	-0.0712653	0.410452	False	False
APOBEC3B_+_39378603.23-P1P2|APOBEC3B_-_39378432.23-P1P2	APOBEC3B	0.157226	0.803476	0.176722	0.330329	0.548438	0.260873	0.0711251	0.0493265	False	False		Acpl2	0.565289	0.24773	0.0417939	0.0342333	0.102334	0.989981	-0.258961	0.628702	False	False		Cep78	0.558544	0.0365666	0.380501	0.375651	-0.133203	0.420762	False	False
APOBEC3F_-_39436896.23-P1P2|APOBEC3F_+_39437128.23-P1P2	APOBEC3F	0.343154	0.464511	-0.031202	0.033718	0.215782	0.665984	-0.27139	0.480492	False	False		Acpp	0.590401	0.228853	-0.125656	0.095082	0.473771	0.324432	-0.222186	0.176776	False	False		Cerk	0.204722	0.000146302	0.000557992	0.824166	0.202241	1.40159	False	False
APOBEC3G_+_39473517.23-P1P2|APOBEC3G_+_39473587.23-P1P2	APOBEC3G	0.399668	0.3983	-0.0533779	0.0494602	0.115975	0.935637	0.292874	0.728478	False	False		Acpt	0.548838	0.260556	0.217005	0.186951	0.761449	0.118359	0.197713	0.0573879	False	False		Cerkl	1.11161	-0.0465799	0.964635	0.262829	-0.0842721	0.18625	False	False
APOBEC3H_-_39493307.23-P1P2|APOBEC3H_+_39493488.23-P1P2	APOBEC3H	0.321609	0.492672	0.0379284	0.0434717	0.185572	0.731488	-0.183798	0.357418	False	False		Acr	0.163452	0.78661	0.814671	2.11884	0.122564	0.911636	-0.567485	1.2687	False	False		Ces1g	0.42715	-0.0324846	0.258506	0.684929	0.0964783	0.555665	False	False
APOBEC4_+_183622414.23-P1P2|APOBEC4_-_183622430.23-P1P2	APOBEC4	0.785481	0.104865	-0.114349	0.0278961	0.272139	0.56521	0.268687	0.403724	False	False		Acrbp	0.215214	0.66713	-0.241292	0.532244	0.145994	0.835664	0.52828	1.08263	False	False		Ces3a	0.926156	0.0896504	1.54686	0.122528	-0.0748961	0.0771675	False	False
APOBR_-_28508486.23-P2|APOBR_-_28508435.23-P2	APOBR	0.998292	0.000742436	-0.184936	0.000319421	0.663841	0.177936	-0.266201	0.125922	False	False		Acrv1	0.596883	0.224111	0.151959	0.112602	0.784852	0.105212	-0.193893	0.050028	False	False		Ces3b	0.506671	0.0487096	0.459785	0.0533277	-0.00861323	0.0038624	False	False
APOBR_+_28506010.23-P1|APOBR_+_28506013.23-P1	APOBR	0.859446	0.0657812	-0.123798	0.0189452	0.445833	0.350828	0.478573	0.446345	False	False		Acsbg1	0.463238	0.334196	0.22816	0.252115	0.0973846	1.01151	-0.520992	1.29236	False	False		Ces5a	1.40426	-0.168571	4.41006	0.534307	0.189781	0.852672	False	False
APOC1_-_45417829.23-P1P2|APOC1_-_45417876.23-P1P2	APOC1	0.0134595	1.87097	0.284316	1.23752	0.54686	0.262124	0.0532234	0.0370883	False	False		Acsbg2	0.320044	0.49479	-0.138177	0.226055	0.103563	0.984795	-0.451839	1.09122	False	False		Cetn1	0.222256	-0.0255788	0.105912	0.121219	-0.127297	0.129755	False	False
APOC2_-_45449332.23-P1P2|APOC2_-_45449342.23-P1P2	APOC2	0.667683	0.175429	-0.115109	0.0469779	0.126892	0.896565	0.212136	0.505621	False	False		Acsf2	0.501865	0.299413	0.0752541	0.0745004	0.491934	0.308094	0.218506	0.165094	False	False		Cetn2	0.122883	0.00991605	0.022701	0.101901	0.0621974	0.0532952	False	False
APOC3_-_116700671.23-P1P2|APOC3_+_116700652.23-P1P2	APOC3	0.0462911	1.3345	0.978429	3.03761	0.461122	0.336185	0.095651	0.0854861	False	False		Acsf3	0.262209	0.581352	-0.345331	0.663792	0.00183861	2.73551	0.889836	5.96941	False	False		Cetn3	1.20742	-0.0787411	1.77123	0.184313	-0.116683	0.180843	False	False
APOC4_+_45445578.23-P1P2|APOC4_+_45445542.23-P1P2	APOC4	0.241367	0.617321	-0.0307328	0.0441364	0.134409	0.87157	0.535846	1.24157	False	False		Acsl1	0.0828511	1.0817	-0.545426	1.95075	0.758677	0.119943	-0.204874	0.0602621	False	False		Cfb	0.00924721	-0.00754715	0.00130019	0.300057	-0.0779472	0.196672	False	False
APOD_+_195310790.23-P1P2|APOD_-_195310422.23-P1P2	APOD	0.139364	0.85585	0.453885	0.903705	0.297936	0.525877	-0.379284	0.530245	False	False		Acsl3	0.472959	0.325177	0.135563	0.145753	0.233076	0.632502	-0.541721	0.840275	False	False		Cfd	0.491119	0.0311879	0.285356	0.152033	-0.0471288	0.0602506	False	False
APOE_-_45409117.23-P1P2|APOE_-_45409137.23-P1P2	APOE	0.19921	0.700689	0.107329	0.174955	0.788873	0.102993	0.074119	0.0202939	False	False		Acsl4	0.0477676	1.32087	-0.498234	2.17595	0.106703	0.971822	-0.464546	1.10713	False	False		Cfl1	0.544378	-0.107342	1.08864	0.445649	0.0553164	0.207293	False	False
APOF_+_56756580.23-P1P2|APOF_+_56756544.23-P1P2	APOF	0.0498436	1.30239	1.11558	3.38006	0.253946	0.595258	-0.866253	1.37081	False	False		Acsl5	0.858741	0.0661379	-0.273674	0.0598469	0.843601	0.0738629	-0.242748	0.0439709	False	False		Cfp	0.373534	0.053746	0.374016	0.988182	0.219843	1.82679	False	False
APOH_-_64225487.23-P1|APOH_-_64225515.23-P1	APOH	0.315712	0.500709	0.43787	0.510052	0.562149	0.250148	-0.253039	0.168272	False	False		Acsl6	0.113243	0.945987	0.377327	1.18021	0.0777652	1.10921	1.07883	2.93463	False	False		Cftr	0.0272463	-0.00856503	0.0043476	0.1425	-0.0417656	0.0500464	False	False
APOH_+_64224198.23-P2|APOH_-_64224106.23-P2	APOH	0.457469	0.339639	-0.50882	0.402036	0.409701	0.387533	0.368669	0.379816	False	False		Acsm1	0.0239318	1.62102	-1.12863	6.04923	0.0729551	1.13694	0.75426	2.10302	False	False		Cga	0.220779	-0.0267899	0.11019	0.342297	0.0634824	0.182724	False	False
APOL1_-_36649201.23-P1P2|APOL1_-_36649205.23-P1P2	APOL1	0.138291	0.859205	0.282461	0.564597	0.922153	0.0351968	0.00352762	0.000330075	False	False		Acsm2	0.721875	0.141538	-0.206052	0.0964291	0.131073	0.882485	-0.830044	1.79636	False	False		Cgref1	0.608246	0.0518956	0.588062	0.0395741	0.0505697	0.0168283	False	False
APOL2_+_36635546.23-P1P2|APOL2_-_36635610.23-P1P2	APOL2	0.271788	0.56577	-0.33701	0.443574	0.133943	0.87308	0.203179	0.471587	False	False		Acsm3	0.948293	0.0230573	-0.00364318	0.000277745	0.406992	0.390414	-0.398355	0.381398	False	False		Cgrrf1	0.306101	-0.0371185	0.211675	0.0734541	-0.00698466	0.0043142	False	False
APOL3_+_36556775.23-P1P2|APOL3_-_36556720.23-P1P2	APOL3	0.871841	0.0595627	-0.140604	0.0194829	0.438601	0.35793	0.237819	0.226294	False	False		Acsm4	0.286558	0.542787	-0.729341	1.30893	0.0981219	1.00823	0.630704	1.55945	False	False		Chaf1a	1.46361	-0.152072	4.14657	0.522121	0.0805014	0.353437	False	False
APOL4_-_36597822.23-P1P2|APOL4_-_36597841.23-P1P2	APOL4	0.00635049	2.19719	0.255272	1.30483	0.247035	0.607242	-0.36105	0.582851	False	False		Acsm5	0.538321	0.268959	-0.177703	0.15803	0.856725	0.0671588	0.0440436	0.00725386	False	False		Chaf1b	1.75423	-0.308904	10.0954	0.908729	0.141443	1.08082	True	False
APOL5_-_36113963.23-ENST00000249044.2|APOL5_+_36113958.23-ENST00000249044.2	APOL5	0.378519	0.421912	0.308266	0.302574	0.108774	0.963476	-0.9306	2.38359	False	False		Acss1	0.928232	0.0323435	-0.256185	0.0273967	0.812966	0.0899277	-0.351271	0.0774674	False	False		Chat	0.445609	-0.0260213	0.216021	1.40466	-0.255504	3.01792	False	False
APOL6_-_36044592.23-P1P2|APOL6_+_36044574.23-P1P2	APOL6	0.421268	0.375441	-0.286437	0.250181	0.0855721	1.06767	0.856017	2.42967	False	False		Acss2	0.150369	0.822842	0.249161	0.677882	0.979091	0.00917681	0.157758	0.00355032	False	False		Chd1	1.03286	-0.0760486	1.46334	0.723884	0.14644	0.89139	False	False
APOLD1_-_12938628.23-P1P2|APOLD1_+_12938640.23-P1P2	APOLD1	0.68292	0.16563	-0.0683	0.0263175	0.322722	0.491171	0.238708	0.311694	False	False		Acss3	0.0988066	1.00521	-0.896542	2.9798	0.369413	0.432488	0.783846	0.831358	False	False		Chd8	1.37046	-0.0922699	2.3558	0.474501	0.0803323	0.320528	False	False
APOO_-_23925881.23-P1P2|APOO_-_23925835.23-P1P2	APOO	0.284849	0.545385	0.117243	0.148755	0.162304	0.789672	0.531366	1.1155	False	False		Acta1	0.51573	0.287577	-0.867588	0.824947	0.943124	0.0254314	0.213349	0.0133059	False	False		Chd9	0.462474	0.0684586	0.589834	0.377437	-0.0709096	0.225054	False	False
APOOL_+_84259102.23-P1P2|APOOL_-_84258921.23-P1P2	APOOL	0.449086	0.347671	-0.245787	0.198797	0.44863	0.348112	0.346159	0.320348	False	False		Acta2	0.732152	0.135399	-0.0923364	0.0413376	0.395963	0.402346	-0.538219	0.531058	False	False		Chek1	3.88542	-0.388255	28.104	2.49702	0.349971	7.34838	True	True
APOPT1_+_104029375.23-P1P2|APOPT1_-_104029328.23-P1P2	APOPT1	0.033053	1.48079	-1.10543	3.80809	0.983546	0.00720516	-0.0324365	0.000621307	False	False		Actb	0.0253593	1.59586	0.453964	2.39538	0.156964	0.804201	0.462804	0.912737	False	False		Chek2	0.361401	0.0159263	0.107231	0.180019	-0.0517624	0.0783556	False	False
APP_+_27543048.23-P1P2|APP_+_27543051.23-P1P2	APP	0.330801	0.480433	-0.333947	0.373245	0.107575	0.968287	-0.196315	0.505343	False	False		Actbl2	0.16367	0.786031	-0.305372	0.793647	0.175708	0.755209	-0.4103	0.759894	False	False		Chfr	0.42532	-0.0242558	0.192196	0.104441	-0.139577	0.122582	False	False
APPBP2_-_58603391.23-P1P2|APPBP2_+_58603361.23-P1P2	APPBP2	0.00567305	2.24618	-1.8249	9.53603	0.987958	0.00526151	-0.04118	0.000576004	False	False		Actc1	0.619568	0.207911	-0.318891	0.219219	0.59713	0.223931	0.256628	0.14093	False	False		Chi3l1	0.514519	-0.00944373	0.0905229	1.37638	0.22669	2.62366	False	False
APPL1_+_57261807.23-P1P2|APPL1_-_57261822.23-P1P2	APPL1	0.18385	0.735537	0.0665938	0.113952	0.0783525	1.10595	-0.690774	2.03095	False	False		Actg1	0.278491	0.555189	0.379928	0.697429	0.705553	0.15147	-0.13596	0.0505034	False	False		Chia	0.704498	-0.0759656	0.997035	1.27809	0.194667	2.09215	False	False
APPL2_+_105629891.23-P1P2|APPL2_-_105629866.23-P1P2	APPL2	0.0108819	1.9633	-1.02062	4.66158	0.153035	0.81521	-0.415772	0.901059	False	False		Actg2	0.114231	0.942216	0.563659	1.756	0.639708	0.194018	0.111539	0.0530705	False	False		Chic2	0.0414857	-0.0328907	0.0254206	0.466739	-0.0737254	0.289354	False	False
APRT_-_88878308.23-P1P2|APRT_-_88878302.23-P1P2	APRT	0.126661	0.897356	0.380815	0.794991	0.179293	0.746436	-0.323396	0.641734	False	False		Actl10	0.350758	0.454992	-0.271351	0.408219	0.408642	0.388657	-0.240127	0.228871	False	False		Chit1	0.798552	-0.0683369	1.01665	0.826624	0.0929921	0.646387	False	False
APTX_-_33001547.23-P1|APTX_-_33001417.23-P1	APTX	0.378098	0.422395	0.0540865	0.0531486	0.878647	0.0561856	0.00841303	0.00125663	False	False		Actl11	0.545481	0.263221	-0.423721	0.368772	0.132347	0.878286	-0.606651	1.30665	False	False		Chka	2.03373	-0.100429	3.80511	0.286932	-0.0268725	0.0648375	False	False
APTX_+_33025069.23-P2|APTX_-_33025057.23-P2	APTX	0.115241	0.938394	0.572723	1.2503	0.799673	0.0970875	-0.127915	0.033015	False	False		Actl6a	0.00728888	2.13734	-2.66641	18.8433	0.0371085	1.43053	0.572951	2.01	True	False		Chkb	0.113957	0.0178306	0.0378548	0.0746617	-0.0732061	0.0459603	False	False
AQP1_+_30893087.23-ENST00000509504.1|AQP1_+_30893268.23-ENST00000509504.1	AQP1	0.196353	0.706963	0.230631	0.379313	0.197365	0.704731	-0.22582	0.423071	False	False		Actl6b	0.96207	0.0167935	-0.0229984	0.00127702	0.798876	0.0975205	-0.0478921	0.0114536	False	False		Chl1	0.0272463	-0.0414786	0.0210545	0.24402	0.163943	0.3364	False	False
AQP10_-_154293619.23-P1P2|AQP10_+_154293791.23-P1P2	AQP10	0.530542	0.27528	-0.028128	0.0180135	0.39073	0.408123	-0.457942	0.496856	False	False		Actl7a	0.193551	0.713205	-0.415113	0.978899	0.185445	0.731785	0.560769	1.00635	False	False		Chm	0.238676	-0.0231807	0.103074	0.0306111	-0.0606582	0.0156137	False	False
AQP11_-_77301026.23-P1P2|AQP11_-_77301023.23-P1P2	AQP11	0.0821916	1.08517	0.288067	0.727236	0.79989	0.0969695	-0.177508	0.0457596	False	False		Actl7b	0.579012	0.237312	0.0272345	0.0213697	0.217758	0.662027	-0.354209	0.575068	False	False		Chn1	0.453075	-0.00384463	0.0324517	0.306691	0.0880778	0.227146	False	False
AQP12A_+_241631475.23-P1P2|AQP12A_-_241631463.23-P1P2	AQP12A	0.809549	0.0917569	-0.121881	0.026017	0.596544	0.224358	0.141778	0.0845627	False	False		Actl9	0.903649	0.0440003	-0.0392409	0.00570891	0.440301	0.356251	0.426015	0.372189	False	False		Chp2	0.405388	0.0247529	0.186943	0.180019	-0.173472	0.262594	False	False
AQP12B_+_241622264.23-P1P2|AQP12B_+_241621938.23-P1P2	AQP12B	0.111838	0.951409	0.386999	0.856565	0.160548	0.794394	-0.457603	0.966392	False	False		Actn1	0.196123	0.707472	-1.46072	3.41692	0.998376	0.000705843	-0.0998173	0.000172782	False	False		Chpf	0.0867286	0.00679125	0.010973	0.222602	-0.0760309	0.142317	False	False
AQP2_+_50344559.23-P1P2|AQP2_+_50344821.23-P1P2	AQP2	0.177778	0.750122	0.259203	0.45233	0.661058	0.179761	0.131675	0.0629255	False	False		Actn2	0.684359	0.164716	-0.099905	0.0544103	0.469465	0.328397	-0.190741	0.153613	False	False		Chrm1	0.00614327	-0.00990098	0.00113316	0.492148	0.106924	0.442495	False	False
AQP3_-_33447534.23-P1|AQP3_-_33447595.23-P1	AQP3	0.289327	0.538611	-0.0313434	0.039274	0.752704	0.123376	0.106205	0.034834	False	False		Actn3	0.549318	0.260176	0.227974	0.196114	0.404115	0.393495	0.268963	0.259546	False	False		Chrm2	0.0989504	-0.00129541	0.00238803	0.201746	-0.0659738	0.111922	False	False
AQP3_+_33443041.23-P2|AQP3_-_33443001.23-P2	AQP3	0.288047	0.540536	0.0502143	0.0631446	0.0141081	1.85053	-0.79242	3.89835	False	False		Actn4	0.858175	0.0664242	0.120757	0.0265214	0.589073	0.229831	0.19184	0.108126	False	False		Chrm3	0.0134194	-0.00225713	0.000564293	0.0163943	-0.00371915	0.000512714	False	False
AQP4_+_24445664.23-P1P2|AQP4_+_24445620.23-P1P2	AQP4	0.198778	0.701632	0.201273	0.328533	0.644577	0.190725	-0.239993	0.121684	False	False		Actr10	0.60139	0.220844	-0.182021	0.132912	0.479633	0.319091	0.358276	0.28036	False	False		Chrm4	0.00101791	0.00406421	7.70728e-05	0.0893593	0.030032	0.0225664	False	False
AQP5_+_50355917.23-P1P2|AQP5_-_50355675.23-P1P2	AQP5	0.15109	0.820765	-1.29947	2.48123	0.455288	0.341714	0.356356	0.323724	False	False		Actr1a	0.441137	0.355426	-0.0363137	0.0426754	0.0368709	1.43332	-0.917199	3.22396	False	False		Chrm5	0.270957	-0.00980219	0.0494808	0.033953	-0.0501186	0.0143092	False	False
AQP6_+_50366744.23-P1P2|AQP6_-_50366959.23-P1P2	AQP6	0.898348	0.0465553	-0.167073	0.018095	0.280755	0.551673	0.137682	0.201924	False	False		Actr1b	0.481443	0.317455	-0.133363	0.139983	0.737714	0.132112	0.0890645	0.0288557	False	False		Chrna1	0.0186889	-0.0804148	0.0279985	0.765055	-0.168358	1.08309	False	False
AQP7_+_33402012.23-P1P2|AQP7_+_33402004.23-P1P2	AQP7	0.76858	0.114311	-0.137962	0.0366887	0.860611	0.0651932	0.0428182	0.00742093	False	False		Actr2	0.07642	1.11679	-0.741696	2.73877	0.666484	0.176211	0.411271	0.177723	False	False		Chrna10	0.0283269	-0.00491134	0.00259187	0.108272	0.130283	0.118617	False	False
AQP8_+_25228481.23-P1P2|AQP8_+_25228499.23-P1P2	AQP8	0.309918	0.508753	0.216889	0.256702	0.692953	0.159296	-0.132389	0.0560643	False	False		Actr3	0.000142071	3.84749	-2.17127	27.6217	0.000660169	3.18034	1.76768	13.7867	True	True		Chrna2	0.138484	0.0310688	0.0801566	0.379225	-0.00410898	0.013103	False	False
AQP9_-_58430619.23-P1P2|AQP9_-_58430777.23-P1P2	AQP9	0.0390154	1.40876	0.189151	0.619914	0.943875	0.0250857	-0.00284122	0.000189478	False	False		Actr3b	0.406086	0.391382	-0.381284	0.493409	0.665425	0.176901	-0.214815	0.0931917	False	False		Chrna3	0.11017	0.00819587	0.0168218	0.181448	0.0866543	0.132215	False	False
AQPEP_-_115298201.23-P1P2|AQPEP_-_115298249.23-P1P2	AQPEP	0.902274	0.0446617	-0.22736	0.0236229	0.465378	0.332194	0.332738	0.293848	False	False		Actr5	0.0179317	1.74638	-1.02019	5.89082	0.0698731	1.15569	0.873891	2.47675	False	False		Chrna4	0.0324282	-0.0124514	0.00752239	0.169856	-0.0271942	0.0388415	False	False
AQR_+_35261872.23-P1P2|AQR_-_35261877.23-P1P2	AQR	0.11065	0.95605	-6.6821	14.862	0.737096	0.132476	0.0335438	0.0118135	True	False		Actr6	0.00030199	3.52001	-1.79385	20.8779	0.904417	0.0436313	-0.110165	0.0117876	True	False		Chrna5	0.1626	-0.0114002	0.0345338	0.848897	0.128404	0.916585	False	False
AR_-_66763912.23-P1P2|AR_-_66763917.23-P1P2	AR	0.420378	0.37636	-0.352603	0.308725	0.341884	0.466122	0.0921942	0.114243	False	False		Actr8	0.0702902	1.15311	-2.33277	8.89401	0.807993	0.0925926	0.208305	0.0472998	True	False		Chrna6	0.275669	-0.0358631	0.184183	0.184313	0.0188532	0.0292201	False	False
ARAF_-_47420655.23-P1P2|ARAF_-_47420581.23-P1P2	ARAF	0.0604325	1.21873	0.14357	0.407056	0.920047	0.0361898	-0.0172098	0.00165573	False	False		Actrt1	0.178768	0.747709	-0.314176	0.776717	0.0171834	1.76489	0.855267	3.70172	False	False		Chrna7	0.38581	0.069338	0.498377	0.100635	-0.0108874	0.0092132	False	False
ARAP1_+_72433345.23-P1|ARAP1_+_72433314.23-P1	ARAP1	0.0384766	1.4148	-0.607563	1.99973	0.784575	0.105365	0.0161983	0.00453729	False	False		Actrt2	0.277533	0.556685	-0.237802	0.437705	0.421981	0.374707	0.317017	0.291312	False	False		Chrna9	0.329181	-0.0183065	0.112267	0.349229	0.0794165	0.233216	False	False
ARAP1_+_72463419.23-P2|ARAP1_+_72463416.23-P2	ARAP1	0.236178	0.626761	0.0488833	0.0712765	0.732675	0.135088	-0.156537	0.0562164	False	False		Actrt3	0.34447	0.462848	0.192092	0.293972	0.972705	0.012019	0.00841043	0.000247896	False	False		Chrnb1	0.226701	-0.0262833	0.111006	0.105716	0.0372119	0.0330796	False	False
ARAP2_-_36245906.23-P1P2|ARAP2_-_36246014.23-P1P2	ARAP2	0.553302	0.257037	0.0348238	0.0208236	0.295893	0.528866	0.34138	0.479967	False	False		Acvr1	0.46236	0.33502	0.210126	0.232759	0.788772	0.103049	0.287564	0.0726709	False	False		Chrnb2	0.198965	-0.0398734	0.147799	0.571548	0.100627	0.48362	False	False
ARAP3_+_141061783.23-P1P2|ARAP3_+_141061751.23-P1P2	ARAP3	0.735802	0.133239	-0.282512	0.0875693	0.227132	0.643722	0.61287	1.04881	False	False		Acvr1b	0.000302831	3.5188	-2.37501	27.6323	0.255478	0.592646	0.276748	0.40222	True	False		Chrnb3	0.0186889	-0.00773239	0.00269223	0.31673	-0.114756	0.305634	False	False
ARC_+_143695828.23-P1P2|ARC_-_143695803.23-P1P2	ARC	0.120121	0.920381	-0.0179741	0.0384855	0.0758645	1.11996	0.450806	1.34221	False	False		Acvr1c	0.496375	0.30419	-0.263	0.26452	0.545197	0.263446	-0.334884	0.216356	False	False		Chrnb4	0.377027	-0.0449878	0.315995	0.388214	0.0952629	0.310981	False	False
ARCN1_-_118443144.23-P1P2|ARCN1_+_118443216.23-P1P2	ARCN1	0.22879	0.640563	-4.5614	6.79741	0.450298	0.3465	2.8651	2.6392	False	False		Acvr2a	0.000134023	3.87282	-1.83905	23.5494	0.714226	0.146164	0.182841	0.065539	True	False		Chrnd	0.405388	-0.0712823	0.538352	0.33199	0.0220012	0.0614199	False	False
AREG_+_75311479.23-P1P2|AREG_-_75311544.23-P1P2	AREG	0.279681	0.553337	0.0144749	0.0186333	0.198298	0.702681	0.357218	0.667298	False	False		Acvr2b	0.255044	0.593384	-0.249349	0.489217	0.274767	0.561035	0.299908	0.412631	False	False		Chrne	0.368317	0.0550763	0.37792	0.459026	-0.134283	0.518319	False	False
AREL1_-_75179713.23-P1P2|AREL1_+_75179717.23-P1P2	AREL1	0.0271054	1.56694	-2.94511	10.7359	0.88638	0.0523801	-0.208583	0.0290451	True	False		Acvrl1	0.615001	0.211124	0.0599816	0.041871	0.071346	1.14663	-0.422091	1.1869	False	False		Chrng	0.334199	-0.0522012	0.325012	0.0328365	-0.0453667	0.0125266	False	False
ARF1_-_228270444.23-P1P2|ARF1_-_228270479.23-P1P2	ARF1	0.633881	0.197992	-0.407385	0.187645	0.643752	0.191282	0.127714	0.064944	False	False		Acy1	0.277214	0.557184	-0.188534	0.347333	0.142395	0.846505	0.699544	1.45221	False	False		Chst1	0.558544	0.0902155	0.938755	0.207648	-0.0572234	0.0999168	False	False
ARF3_+_49351226.23-P1P2|ARF3_+_49351049.23-P1P2	ARF3	0.337464	0.471772	-0.0257755	0.0282893	0.235117	0.628715	0.337866	0.564711	False	False		Acy3	0.839544	0.0759563	0.0652133	0.0163779	0.352546	0.452784	-0.651251	0.723142	False	False		Chst12	0.11017	-0.0136531	0.0280227	0.372089	-0.110893	0.346968	False	False
ARF4_-_57583033.23-P1P2|ARF4_+_57583046.23-P1P2	ARF4	0.00720365	2.14245	-2.81057	14.0084	0.0464963	1.33258	-0.945532	3.34964	True	False		Acyp1	0.878021	0.0564951	-0.251521	0.0469832	0.172937	0.762111	-0.466132	0.871185	False	False		Chst13	0.126748	-0.022045	0.0520553	0.436186	0.192085	0.704537	False	False
ARF5_-_127228493.23-P1|ARF5_-_127228524.23-P1	ARF5	0.0478591	1.32004	-0.460399	1.41385	0.206183	0.685747	0.0982232	0.179063	False	False		Acyp2	0.998275	0.0007497	-0.16914	0.000419268	0.19553	0.708787	0.339209	0.589613	False	False		Chst14	0.320874	-0.0313498	0.187406	0.254941	0.136157	0.291889	False	False
ARF5_-_127229626.23-P2|ARF5_-_127229665.23-P2	ARF5	0.611752	0.213424	-0.378645	0.188001	0.381531	0.41847	-0.350398	0.389811	False	False		Ada	0.90993	0.0409922	-0.257823	0.0349446	0.663311	0.178283	0.38378	0.167794	False	False		Chst4	0.330851	0.0190377	0.117344	0.340572	0.104121	0.298184	False	False
ARF6_-_50359827.23-P1|ARF6_-_50359824.23-P1	ARF6	0.859056	0.0659784	-0.228309	0.0350436	0.573055	0.241804	-0.252629	0.162396	False	False		Adad1	0.356366	0.448103	-0.344627	0.510606	0.340242	0.468212	0.323601	0.371566	False	False		Chst5	0.107111	0.0362919	0.0724202	0.457665	-0.105461	0.405861	False	False
ARF6_+_50361360.23-P2|ARF6_+_50361377.23-P2	ARF6	0.358522	0.445484	-0.668772	0.693097	0.686972	0.163061	0.0390003	0.0169062	False	False		Adad2	0.7403	0.130592	-0.00557876	0.00240886	0.504401	0.297224	0.130555	0.0951616	False	False		Chst7	0.42532	-0.0586695	0.464882	0.0395741	0.0532936	0.0177347	False	False
ARFGAP1_+_61904219.23-P1P2|ARFGAP1_-_61904178.23-P1P2	ARFGAP1	0.228102	0.641871	0.0666579	0.0995367	0.822261	0.0849904	0.0511698	0.0115614	False	False		Adal	0.189962	0.721333	0.100973	0.240824	0.132754	0.876953	-0.386469	0.831141	False	False		Chsy3	0.102667	0.0118334	0.0226337	0.379225	-0.150408	0.47963	False	False
ARFGAP2_+_47198411.23-P1P2|ARFGAP2_+_47198415.23-P1P2	ARFGAP2	0.09299	1.03156	0.185042	0.444068	0.867518	0.0617217	-0.0657815	0.0107937	False	False		Adam10	0.588413	0.230318	0.237108	0.180564	0.919397	0.0364967	-0.170993	0.0153044	False	False		Chuk	0.191829	-0.0373544	0.133497	0.622802	0.0565918	0.296375	False	False
ARFGAP3_-_43253140.23-P1P2|ARFGAP3_-_43253228.23-P1P2	ARFGAP3	0.0518345	1.28538	0.665405	1.98976	0.36767	0.434542	-0.546115	0.630876	False	False		Adam11	0.32889	0.48295	0.191793	0.306262	0.310183	0.508383	-0.363818	0.453584	False	False		Cib1	0.536349	-0.113155	1.13066	0.394948	0.0843319	0.280072	False	False
ARFGEF1_+_68255970.23-P1P2|ARFGEF1_+_68255550.23-P1P2	ARFGEF1	0.00529948	2.27577	-3.56666	18.8831	0.768634	0.11428	0.265019	0.0805149	True	False		Adam12	0.499116	0.301798	-0.207672	0.20723	0.600671	0.221363	-0.405859	0.220325	False	False		Cib2	0.0891525	-0.0126503	0.0210111	0.00891598	-0.144209	0.0108118	False	False
ARFGEF2_+_47538281.23-P1P2|ARFGEF2_-_47538312.23-P1P2	ARFGEF2	0.958477	0.0184185	-0.237871	0.0101925	0.607789	0.216247	0.554289	0.31865	False	False		Adam15	0.822124	0.0850624	0.0261436	0.00735294	0.197042	0.705441	-0.75593	1.30775	False	False		Cib3	0.808077	-0.0749305	1.12804	1.32512	0.157043	1.7499	False	False
ARFIP1_+_153701170.23-P1P2|ARFIP1_-_153701186.23-P1P2	ARFIP1	0.0284565	1.54582	0.109784	0.394805	0.0232325	1.6339	0.349984	1.52021	False	False		Adam17	0.135628	0.86765	0.422196	1.2112	0.167047	0.77716	0.245812	0.468486	False	False		Cic	0.638051	0.0763263	0.907285	1.35148	-0.244143	2.77453	False	False
ARFIP2_+_6502528.23-P1P2|ARFIP2_+_6502522.23-P1P2	ARFIP2	0.999757	0.000105589	-0.185483	4.55625e-05	0.376102	0.424694	0.413504	0.466857	False	False		Adam18	0.501406	0.29981	-0.108799	0.107852	0.555891	0.255011	-0.0102787	0.00642806	False	False		Cidea	0.181954	-0.0415475	0.140838	1.11172	0.274888	2.56975	False	False
ARFRP1_-_62338974.23-P1P2|ARFRP1_+_62339198.23-P1P2	ARFRP1	0.0193922	1.71237	-1.04141	4.14863	0.649091	0.187694	-0.215303	0.107431	False	False		Adam19	0.841798	0.074792	-0.00880058	0.00217633	0.843601	0.0738629	-0.187425	0.0339498	False	False		Cideb	0.0712221	0.00902103	0.0119697	0.379225	0.142969	0.455908	False	False
ARG1_-_131894387.23-P1P2|ARG1_+_131894441.23-P1P2	ARG1	0.661696	0.179342	-0.329306	0.137393	0.0915469	1.03836	-0.222593	0.61445	False	False		Adam1a	0.286233	0.543281	-0.15376	0.276202	0.890562	0.0503358	0.180694	0.0223051	False	False		Cidec	0.679467	-0.120353	1.52349	0.324211	0.0757343	0.206471	False	False
ARG2_+_68086667.23-P1P2|ARG2_-_68086620.23-P1P2	ARG2	0.879103	0.0559605	-0.111331	0.0144938	0.324076	0.489353	0.224114	0.291554	False	False		Adam1b	0.65558	0.183374	-0.198162	0.120148	0.859583	0.0657123	-0.282585	0.0455386	False	False		Ciita	0.128494	-0.013982	0.0334707	1.57357	-0.258188	3.41635	False	False
ARGFX_-_121286824.23-P1P2|ARGFX_-_121286860.23-P1P2	ARGFX	0.22807	0.641932	0.122299	0.182639	0.532244	0.273889	0.0143832	0.0104727	False	False		Adam2	0.463238	0.334196	0.0517566	0.0571906	0.737165	0.132435	0.221934	0.0720796	False	False		Cilp2	0.153119	-0.0173049	0.0493642	0.0710469	-0.00389484	0.00232687	False	False
ARGLU1_+_107220466.23-P1P2|ARGLU1_-_107220477.23-P1P2	ARGLU1	0.00898072	2.04669	-2.42373	11.5404	0.297478	0.526544	-0.382073	0.534823	True	False		Adam20	0.529319	0.276282	0.24437	0.223233	0.770897	0.113004	-0.0112855	0.00312751	False	False		Cinp	0.574916	-0.060294	0.645792	0.150663	-0.0549602	0.0696293	False	False
ARHGAP1_+_46722124.23-P1P2|ARHGAP1_+_46722099.23-P1P2	ARHGAP1	0.948898	0.0227805	-0.165899	0.00879203	0.742679	0.129199	-0.200299	0.0687964	False	False		Adam21	0.604403	0.218674	-0.0728589	0.0526789	0.68886	0.161869	-0.158041	0.062736	False	False		Cit	2.96628	-0.177517	9.80994	1.09206	0.240582	2.20926	True	False
ARHGAP10_-_148653268.23-P1P2|ARHGAP10_+_148653282.23-P1P2	ARHGAP10	0.992824	0.00312752	-0.182697	0.00132927	0.229786	0.638677	0.200675	0.340724	False	False		Adam22	0.88712	0.0520177	0.0461368	0.00793516	0.639187	0.194372	0.0734141	0.0349942	False	False		Cited2	0.0747624	0.0277305	0.0386237	0.108272	-0.0219693	0.020002	False	False
ARHGAP11A_-_32907738.23-P1P2|ARHGAP11A_-_32908159.23-P1P2	ARHGAP11A	0.271024	0.566993	-0.356007	0.469591	0.497402	0.303293	-0.339814	0.273988	False	False		Adam23	0.993101	0.00300656	-0.218635	0.00217344	0.211837	0.673997	0.518441	0.856922	False	False		Ckap2	1.09235	-0.124654	2.53678	0.388214	-0.142148	0.464036	False	False
ARHGAP11B_-_30918382.23-P1P2|ARHGAP11B_-_30918429.23-P1P2	ARHGAP11B	0.671554	0.172919	-0.289608	0.116503	0.40578	0.391709	-0.227439	0.236841	False	False		Adam24	0.888258	0.0514607	-0.0751666	0.0127896	0.706635	0.150805	-0.112976	0.0417817	False	False		Ckap5	0.612467	-0.290816	3.3183	0.0898525	0.0339962	0.0256861	False	False
ARHGAP12_+_32217575.23-P1P2|ARHGAP12_-_32217708.23-P1P2	ARHGAP12	0.0922394	1.03508	0.228878	0.551141	0.035479	1.45003	0.204258	0.78738	False	False		Adam25	0.514335	0.288754	-0.293996	0.28069	0.423244	0.373409	0.345395	0.316289	False	False		Ckb	0.154465	0.00984295	0.028325	0.028396	0.0480141	0.0114647	False	False
ARHGAP15_-_143887002.23-P1P2|ARHGAP15_-_143887035.23-P1P2	ARHGAP15	0.785636	0.104779	-0.0385109	0.00938729	0.771431	0.112703	0.0389751	0.0116775	False	False		Adam26a	0.959773	0.0178316	-0.106522	0.00628042	0.492392	0.307689	-0.286421	0.216123	False	False		Ckm	0.210523	-0.0101564	0.0398339	0.0881199	-0.0334555	0.0247902	False	False
ARHGAP17_-_25026675.23-P1P2|ARHGAP17_+_25026532.23-P1P2	ARHGAP17	0.012136	1.91592	0.4214	1.87826	0.322437	0.491555	-0.381929	0.499095	False	False		Adam26b	0.341902	0.466098	0.202471	0.312031	0.28128	0.550861	0.377823	0.510404	False	False		Ckmt2	0.232666	-0.0289666	0.125558	0.607663	0.168109	0.858996	False	False
ARHGAP18_-_130031326.23-P1P2|ARHGAP18_-_130031261.23-P1P2	ARHGAP18	0.580781	0.235987	0.139685	0.076687	0.227328	0.643346	-0.351757	0.601612	False	False		Adam28	0.611965	0.213274	0.14373	0.101355	0.31894	0.496291	0.581018	0.707147	False	False		Cks1b	1.15904	-0.0749788	1.61902	0.134437	-0.0132554	0.0149848	False	False
ARHGAP19_+_99052371.23-P1P2|ARHGAP19_-_99052346.23-P1P2	ARHGAP19	0.288083	0.540482	0.390894	0.491501	0.895076	0.0481403	0.00245825	0.000314604	False	False		Adam29	0.068521	1.16418	-0.379722	1.46164	0.154242	0.811797	0.407683	0.811621	False	False		Cks2	0.655353	0.0200604	0.244922	0.242471	-0.0573423	0.116916	False	False
ARHGAP20_+_110583103.23-P1P2|ARHGAP20_+_110583100.23-P1P2	ARHGAP20	0.586599	0.231659	0.0687349	0.0370433	0.38107	0.418995	-0.173697	0.193477	False	False		Adam3	0.884275	0.0534127	-0.0838809	0.0148138	0.405758	0.391733	0.129428	0.124337	False	False		Clasp1	2.01889	-0.175139	6.58731	0.282985	0.0492754	0.117255	False	False
ARHGAP21_+_25012355.23-P1P2|ARHGAP21_+_25012738.23-P1P2	ARHGAP21	0.180166	0.744326	0.255335	0.442137	0.713957	0.146328	-0.139535	0.0542797	False	False		Adam30	0.849131	0.0710251	-0.100689	0.0236457	0.75259	0.123442	-0.0467253	0.0141448	False	False		Clasp2	0.489189	-0.0698739	0.636803	0.0807392	0.0577926	0.0392369	False	False
ARHGAP22_-_49813131.23-P1P2|ARHGAP22_+_49813140.23-P1P2	ARHGAP22	0.0212257	1.67314	-1.75765	6.84145	0.276469	0.558354	0.261557	0.388243	False	False		Adam32	0.0817077	1.08774	0.452876	1.62877	0.437288	0.359233	-0.217673	0.191763	False	False		Clasrp	0.340931	0.0363268	0.230732	0.160311	-0.0521901	0.0703543	False	False
ARHGAP23_+_36584749.23-P1P2|ARHGAP23_+_36584742.23-P1P2	ARHGAP23	0.289823	0.537867	0.0791921	0.0990925	0.927284	0.0327871	-0.0587747	0.00512297	False	False		Adam33	0.288518	0.539827	-0.22545	0.402405	0.119942	0.92103	-0.6454	1.45776	False	False		Clcn2	0.342621	-0.0678027	0.432787	0.307287	0.0568788	0.146971	False	False
ARHGAP24_-_86396380.23-P1P2|ARHGAP24_-_86396392.23-P1P2	ARHGAP24	0.698502	0.155832	-0.364536	0.132154	0.574665	0.240586	0.191163	0.122265	False	False		Adam34	0.931095	0.0310058	0.155038	0.0158942	0.409468	0.38778	-0.157809	0.150073	False	False		Clcnkb	0.0561427	0.0343329	0.0359101	1.53706	0.169656	2.1928	False	False
ARHGAP25_-_68962176.23-P1P2|ARHGAP25_+_68962004.23-P1P2	ARHGAP25	0.462898	0.334515	0.0684638	0.0532795	0.834869	0.0783815	0.0136412	0.00284245	False	False		Adam39	0.694539	0.158303	0.232276	0.121577	0.927492	0.0326898	0.106043	0.00850113	False	False		Cldn3	0.410789	-0.062359	0.477234	0.70773	0.143055	0.851354	False	False
ARHGAP26_-_142150021.23-P1P2|ARHGAP26_+_142150202.23-P1P2	ARHGAP26	0.0147476	1.83128	-2.38624	10.166	0.212584	0.67247	-0.597795	1.06869	True	False		Adam4	0.518994	0.284838	-0.229037	0.215706	0.19553	0.708787	0.523954	0.910737	False	False		Cldn4	0.20638	0.0143518	0.0551807	0.0732382	0.0051571	0.00317601	False	False
ARHGAP27_-_43487747.23-P1|ARHGAP27_-_43487732.23-P1	ARHGAP27	0.0999243	1.00033	0.0523887	0.121917	0.121591	0.915099	-0.601942	1.46437	False	False		Adam5	0.394382	0.404083	-0.467089	0.624061	0.996515	0.00151624	-0.105183	0.000391106	False	False		Cldn5	0.14776	0.044852	0.123468	0.125156	0.0435767	0.045861	False	False
ARHGAP27_+_43502986.23-P2|ARHGAP27_+_43503003.23-P2	ARHGAP27	0.00241825	2.6165	0.175014	1.06531	0.619703	0.207816	-0.145865	0.0805858	False	False		Adam6a	0.415514	0.381414	-0.155845	0.196538	0.744865	0.127923	-0.264956	0.08312	False	False		Clec3b	0.100187	0.043056	0.0803633	0.891699	-0.133244	0.999088	False	False
ARHGAP28_+_6729759.23-P1P2|ARHGAP28_+_6729774.23-P1P2	ARHGAP28	0.684712	0.164492	-0.311938	0.119371	0.606499	0.21717	0.345881	0.19969	False	False		Adam6b	0.334994	0.474963	0.218577	0.343258	0.667543	0.175521	0.276244	0.118906	False	False		Clgn	0.601937	-0.000813734	0.0091253	0.762398	-0.173756	1.11393	False	False
ARHGAP29_+_94703085.23-P1P2|ARHGAP29_+_94702836.23-P1P2	ARHGAP29	0.222169	0.653316	0.0297885	0.0452748	0.00712313	2.14733	0.148804	0.849458	False	False		Adam7	0.731068	0.136042	0.0350145	0.01575	0.888261	0.0514594	0.00124199	0.000156735	False	False		Clic5	0.520437	-0.0357035	0.346172	0.00260366	0.0728353	0.00159464	False	False
ARHGAP30_+_161039652.23-P1P2|ARHGAP30_-_161039638.23-P1P2	ARHGAP30	0.393001	0.405607	0.194576	0.183602	0.46875	0.329059	-0.202441	0.177093	False	False		Adam8	0.256428	0.591035	-0.315795	0.617129	0.805068	0.0941675	0.156121	0.0360533	False	False		Clic6	1.46361	0.0909085	2.47881	1.09766	-0.307049	2.83409	False	False
ARHGAP31_+_119013334.23-P1P2|ARHGAP31_-_119013294.23-P1P2	ARHGAP31	0.902247	0.0446747	-0.247118	0.0256832	0.837164	0.0771896	-0.135434	0.0277917	False	False		Adam9	0.226627	0.644688	-0.312776	0.666715	0.21912	0.659319	0.860158	1.39078	False	False		Clk1	0.74254	0.0477107	0.660008	0.365001	-0.122709	0.376623	False	False
ARHGAP32_+_129062200.23-ENST00000310343.9|ARHGAP32_-_129062212.23-ENST00000310343.9	ARHGAP32	0.469108	0.328728	0.364119	0.27846	0.961147	0.0172103	-0.0957297	0.0043799	False	False		Adamdec1	0.0146368	1.83455	1.07925	6.54654	0.10764	0.968026	-1.06689	2.53274	False	False		Clk2	0.11017	0.00793615	0.0162888	0.927668	0.154111	1.20217	False	False
ARHGAP33_+_36266681.23-P1P2|ARHGAP33_+_36266470.23-P1P2	ARHGAP33	0.00472288	2.32579	-1.61162	8.72	0.228564	0.640991	0.319172	0.543882	False	False		Adamts1	0.837855	0.0768311	-0.0134722	0.00342241	0.100361	0.998436	-0.720363	1.76382	False	False		Clk3	0.0448308	-0.00441368	0.00368631	0.0510095	-0.0233633	0.0100213	False	False
ARHGAP35_-_47421941.23-ENST00000404338.3|ARHGAP35_-_47422000.23-ENST00000404338.3	ARHGAP35	0.538058	0.269171	-0.0256491	0.0160615	0.947796	0.0232849	-0.05564	0.00344421	False	False		Adamts10	0.524144	0.28055	-0.153236	0.142144	0.504866	0.296824	-0.163593	0.119082	False	False		Clk4	0.504717	0.0495412	0.465831	0.0844176	-0.0819796	0.0581938	False	False
ARHGAP36_+_130192380.23-P1P2|ARHGAP36_-_130192288.23-P1P2	ARHGAP36	0.714976	0.145708	-0.107179	0.0363309	0.931465	0.0308335	-0.0033741	0.000276572	False	False		Adamts12	0.643137	0.191697	-0.225307	0.142806	0.660143	0.180362	0.00676038	0.00299019	False	False		Clp1	0.504717	-0.13776	1.29534	0.0509437	0.0117439	0.00503086	False	False
ARHGAP39_+_145911186.23-P1P2|ARHGAP39_+_145911217.23-P1P2	ARHGAP39	0.0282005	1.54974	0.0357727	0.128972	0.88451	0.0532973	-0.0861216	0.0122024	False	False		Adamts13	0.187056	0.728028	0.410985	0.989309	0.362819	0.44031	-0.242746	0.262116	False	False		Clpb	0.81045	-0.115071	1.73742	0.154781	0.0453362	0.0590067	False	False
ARHGAP4_+_153191307.23-P2|ARHGAP4_+_153191682.23-P2	ARHGAP4	0.201723	0.695244	0.0394627	0.0638275	0.53062	0.275217	0.0393033	0.0287562	False	False		Adamts14	0.275625	0.559682	0.176569	0.326748	0.141604	0.848923	-0.214858	0.447305	False	False		Clpp	0.250829	0.0219819	0.10272	0.206168	0.0635142	0.110111	False	False
ARHGAP40_-_37230545.23-P1P2|ARHGAP40_+_37230557.23-P1P2	ARHGAP40	0.048322	1.31585	0.332419	1.0176	0.25644	0.591014	0.487467	0.765899	False	False		Adamts15	0.557034	0.254118	0.198309	0.166624	0.59713	0.223931	0.131209	0.0720543	False	False		Clps	0.201838	-0.0408831	0.153731	0.171506	-0.0329412	0.0475068	False	False
ARHGAP42_+_100558059.23-P1P2|ARHGAP42_-_100558046.23-P1P2	ARHGAP42	0.25374	0.595612	-0.0276335	0.0382898	0.650685	0.186629	-0.377335	0.187213	False	False		Adamts16	0.0714148	1.14621	-0.935036	3.54365	0.32966	0.481934	0.673009	0.795411	False	False		Clpx	0.281991	-0.0311418	0.163604	0.149295	0.011199	0.0140593	False	False
ARHGAP44_-_12693204.23-P1P2|ARHGAP44_-_12692860.23-P1P2	ARHGAP44	0.131911	0.879717	0.318388	0.651604	0.895886	0.0477471	-0.0897813	0.0113962	False	False		Adamts17	0.934175	0.029572	0.0237197	0.00231924	0.777247	0.109441	0.0289033	0.00775731	False	False		Clspn	0.655353	-0.440261	5.37526	0.598494	-0.218565	1.09996	False	False
ARHGAP5_+_32546214.23-P1P2|ARHGAP5_-_32546259.23-P1P2	ARHGAP5	0.970709	0.012911	-0.177217	0.00532293	0.518268	0.285446	0.0826139	0.062691	False	False		Adamts18	0.818763	0.086842	0.067965	0.0195152	0.454665	0.342309	-0.341796	0.286925	False	False		Cltc	0.00203821	-0.00336765	0.000127876	0.373868	-0.0981685	0.308624	False	False
ARHGAP6_+_11445719.23-P1P2|ARHGAP6_+_11445607.23-P1P2	ARHGAP6	0.00674009	2.17133	-4.28309	21.6355	0.817175	0.0876848	-0.537452	0.125283	True	False		Adamts19	0.648044	0.188396	0.0013189	0.00082156	0.730258	0.136524	-0.50563	0.169287	False	False		Clybl	0.803302	-0.0424644	0.635503	0.0831888	-0.0464377	0.0324843	False	False
ARHGAP8_-_45098408.23-P1|ARHGAP8_+_45098588.23-P1	ARHGAP8	0.232017	0.634481	0.0824122	0.121645	0.0146356	1.83459	-0.676551	3.29965	False	False		Adamts2	0.27913	0.554193	-0.181274	0.332165	0.993611	0.0027838	0.117605	0.000802872	False	False		Cma1	0.0595849	-0.126526	0.140453	0.106771	0.0436416	0.0391826	False	False
ARHGAP9_-_57871601.23-P1P2|ARHGAP9_-_57871616.23-P1P2	ARHGAP9	0.190523	0.720052	0.535037	0.896254	0.492589	0.307515	0.0686687	0.0561375	False	False		Adamts20	0.840108	0.075665	0.0420619	0.010523	0.797752	0.0981322	-0.128624	0.0309541	False	False		Cmas	0.325849	-0.033986	0.206315	1.28413	0.177838	1.92031	False	False
ARHGDIA_+_79829172.23-P1P2|ARHGDIA_+_79829165.23-P1P2	ARHGDIA	0.516459	0.286964	-0.0429741	0.0286891	0.0291635	1.53516	0.0823648	0.336143	False	False		Adamts3	0.932814	0.030205	-1.0693	0.106791	0.798547	0.0976997	-0.0433345	0.0103827	False	False		Cmbl	0.243212	-0.148544	0.673063	0.357005	-0.0538064	0.161528	False	False
ARHGDIB_+_15114500.23-P1P2|ARHGDIB_+_15114492.23-P1P2	ARHGDIB	0.224007	0.649739	0.325547	0.492081	0.333156	0.477352	0.0733558	0.0930898	False	False		Adamts4	0.558971	0.252611	-0.346542	0.289445	0.747069	0.126639	0.174719	0.0542616	False	False		Cmpk1	0.188994	-0.0266548	0.0938507	0.0174727	0.0381782	0.00560938	False	False
ARHGDIG_-_330602.23-P1P2|ARHGDIG_-_330659.23-P1P2	ARHGDIG	0.348304	0.458042	-0.154305	0.164426	0.913192	0.0394381	-0.0275969	0.00289338	False	False		Adamts5	0.400007	0.397933	-0.220273	0.28982	0.0176997	1.75203	-0.659775	2.8348	False	False		Cmya5	0.246251	0.0264401	0.121298	0.28044	0.0191611	0.0451855	False	False
ARHGEF1_-_42387296.23-P1|ARHGEF1_-_42387322.23-P1	ARHGEF1	0.624382	0.204549	-0.246993	0.117535	0.0797282	1.09839	0.137046	0.400174	False	False		Adamts6	0.743023	0.128998	-0.134921	0.0575465	0.012704	1.89606	-1.0464	4.86555	False	False		Cnbp	0.194675	0.0198072	0.0718371	0.0418405	0.0690442	0.024292	False	False
ARHGEF1_-_42388477.23-P2|ARHGEF1_-_42388487.23-P2	ARHGEF1	0.811442	0.0907425	-0.224338	0.0473585	0.241246	0.617539	-0.143729	0.23596	False	False		Adamts7	0.457546	0.339565	-0.172106	0.193231	0.540853	0.266921	-0.401547	0.262847	False	False		Cnksr1	0.25236	-0.042149	0.198163	1.4428	-0.168236	2.04111	False	False
ARHGEF10_-_1772144.23-P1P2|ARHGEF10_+_1772299.23-P1P2	ARHGEF10	0.0747461	1.12641	0.118204	0.309751	0.0523445	1.28113	-0.202336	0.689119	False	False		Adamts8	0.718639	0.143489	-0.427492	0.202817	0.0601477	1.22078	-0.821737	2.46011	False	False		Cnksr2	0.493053	-0.0609639	0.55999	0.0746617	0.0382322	0.024003	False	False
ARHGEF10L_-_17866424.23-P1P2|ARHGEF10L_+_17866293.23-P1P2	ARHGEF10L	0.463834	0.333637	-0.335282	0.260237	0.817693	0.0874098	-0.0995681	0.0231371	False	False		Adamts9	0.0519752	1.2842	0.350984	1.49032	0.31894	0.496291	0.325917	0.396668	False	False		Cnksr3	0.191829	0.0144902	0.051785	0.0662641	-0.0287377	0.0160129	False	False
ARHGEF11_-_157015113.23-P1P2|ARHGEF11_-_157015491.23-P1P2	ARHGEF11	0.550908	0.258921	-0.258575	0.155754	0.48666	0.312775	0.204174	0.16977	False	False		Adamtsl1	0.229966	0.638336	-0.166795	0.352038	0.460837	0.336453	-0.262708	0.216761	False	False		Cnot2	0.595656	-0.147814	1.6403	0.490175	0.0395872	0.163171	False	False
ARHGEF12_+_120207088.23-P1P2|ARHGEF12_+_120207116.23-P1P2	ARHGEF12	0.438584	0.357947	-0.0583388	0.0485803	0.183633	0.73605	0.238527	0.466738	False	False		Adamtsl2	0.0183906	1.7354	0.517014	2.96661	0.0423153	1.3735	-1.27908	4.30835	False	False		Cnot6l	0.434498	0.0304372	0.24638	0.0674559	-0.00826523	0.00468827	False	False
ARHGEF15_+_8213591.23-P1P2|ARHGEF15_+_8214130.23-P1P2	ARHGEF15	0.176064	0.754331	0.120707	0.211826	0.100163	0.999293	-0.494365	1.31332	False	False		Adamtsl3	0.0737084	1.13248	-0.472975	1.77104	0.61544	0.210814	-0.0934727	0.0483246	False	False		Cnot8	0.356244	0.0415452	0.275729	0.32179	-0.12783	0.345893	False	False
ARHGEF16_-_3371005.23-P1P2|ARHGEF16_+_3371660.23-P1P2	ARHGEF16	0.0120556	1.91881	-4.7146	21.0455	0.484985	0.314272	0.0949857	0.0793582	True	False		Adamtsl4	0.619568	0.207911	-0.320555	0.220363	0.70826	0.149808	-0.150408	0.0552572	False	False		Cnp	0.101426	-0.0201956	0.0381609	0.459026	0.0686384	0.264937	False	False
ARHGEF17_-_73019356.23-P1P2|ARHGEF17_-_73019377.23-P1P2	ARHGEF17	0.0389868	1.40908	0.14576	0.477813	0.679162	0.168026	-0.00743447	0.0033209	False	False		Adamtsl5	0.0260278	1.58456	-1.04825	5.49201	0.193277	0.713819	0.544336	0.952882	False	False		Cnpy4	1.33705	0.0700081	1.74385	0.114712	-0.0734377	0.0708378	False	False
ARHGEF18_-_7460074.23-P1P2|ARHGEF18_-_7460077.23-P1P2	ARHGEF18	0.0168638	1.77305	0.16503	0.680715	0.209585	0.678639	0.2049	0.369666	False	False		Adap1	0.952884	0.02096	-0.0480768	0.00333184	0.99303	0.00303775	0.407433	0.00303524	False	False		Cnr1	0.0771353	-0.114395	0.16439	0.0574548	-0.0341082	0.0164787	False	False
ARHGEF19_+_16533491.23-P1P2|ARHGEF19_+_16533485.23-P1P2	ARHGEF19	0.032593	1.48688	0.274259	0.948679	0.606426	0.217222	0.263159	0.151968	False	False		Adap2	0.794771	0.0997581	0.0200899	0.00662649	0.404936	0.392613	0.255243	0.245755	False	False		Cnr2	1.11644	-0.0721817	1.50133	0.0510095	0.00103085	0.000442167	False	False
ARHGEF2_-_155948223.23-P1P2|ARHGEF2_-_155948140.23-P1P2	ARHGEF2	0.155786	0.807472	0.314945	0.591625	0.143375	0.843527	-0.299584	0.671808	False	False		Adar	0.108565	0.964311	-2.75285	8.77722	0.00346268	2.46059	-1.85289	11.1808	True	True		Cntf	0.219306	-0.00977353	0.0399315	0.520101	0.0721362	0.315485	False	False
ARHGEF25_-_58005653.23-P1P2|ARHGEF25_+_58005227.23-P1P2	ARHGEF25	0.155778	0.807493	0.0380956	0.0715645	0.207597	0.682778	-0.501	0.90938	False	False		Adarb1	0.875181	0.0579022	-0.309077	0.0591724	0.803941	0.0947757	0.356629	0.0828892	False	False		Cntn1	0.214902	-0.0033965	0.0135983	0.116008	-0.0239303	0.0233439	False	False
ARHGEF26_+_153839215.23-P1P2|ARHGEF26_-_153839264.23-P1P2	ARHGEF26	0.124933	0.903324	-0.866101	1.8201	0.533726	0.272681	0.260866	0.189104	False	False		Adarb2	0.175761	0.755079	0.298442	0.745092	0.0203931	1.69052	-1.04749	4.34261	False	False		Cntn3	0.972334	0.059148	1.07144	0.207648	-0.089891	0.156957	False	False
ARHGEF28_-_72922052.23-P1P2|ARHGEF28_+_72922024.23-P1P2	ARHGEF28	0.321379	0.492983	-0.455919	0.522881	0.0183793	1.73567	0.769728	3.55167	False	False		Adat1	0.922508	0.0350299	-0.108164	0.0125279	0.535566	0.271187	-0.0573071	0.0381119	False	False		Cntn4	0.765659	-0.0723843	1.03251	0.191527	0.0845415	0.136157	False	False
ARHGEF3_-_56835979.23-P1P2|ARHGEF3_-_56835924.23-P1P2	ARHGEF3	0.271167	0.566763	0.0663598	0.0874964	0.868485	0.0612378	-0.0881493	0.0143505	False	False		Adat2	0.0215292	1.66697	-0.639045	3.52223	0.651728	0.185934	0.104583	0.0476873	False	False		Cntn5	0.26006	0.0129941	0.0629552	0.65355	-0.170325	0.93604	False	False
ARHGEF33_-_39146583.23-ENST00000398800.4|ARHGEF33_-_39146566.23-ENST00000398800.4	ARHGEF33	0.0740809	1.13029	0.0423004	0.111229	0.198304	0.702669	0.72681	1.35769	False	False		Adat3	0.903078	0.0442747	-0.0494111	0.00723332	0.169521	0.770777	0.577542	1.09168	False	False		Cntn6	0.344314	0.0253883	0.162855	0.524144	-0.106219	0.468158	False	False
ARHGEF35_-_143991217.23-ENST00000543357.1|ARHGEF35_+_143991205.23-ENST00000543357.1	ARHGEF35	0.00374189	2.42691	-2.66719	15.0588	0.674417	0.171071	-0.730704	0.332312	True	False		Adc	0.0500904	1.30025	0.360943	1.55175	0.671254	0.173113	-0.182064	0.0772924	False	False		Cntrob	2.21994	-0.145506	6.01778	1.29625	0.225345	2.45627	False	False
ARHGEF35_+_143892694.23-ENST00000378115.2|ARHGEF35_-_143892637.23-ENST00000378115.2	ARHGEF35	0.0112394	1.94926	-2.8493	12.9208	0.197604	0.704204	0.387834	0.72606	True	False		Adck1	0.690817	0.160637	-0.0703119	0.037345	0.610329	0.214436	0.41466	0.218058	False	False		Coasy	0.0493257	-0.0192876	0.0177242	0.357961	-0.179377	0.539933	False	False
ARHGEF37_-_148961080.23-P1|ARHGEF37_-_148961062.23-P1	ARHGEF37	0.00970427	2.01304	-1.22326	5.72869	0.105211	0.97794	-0.751191	1.95295	False	False		Adck2	0.0437127	1.35939	-0.839553	3.77355	0.105116	0.978329	0.77712	1.86448	False	False		Coch	0.0618922	0.00676281	0.00779788	0.216586	0.0406713	0.0740724	False	False
ARHGEF37_+_148931230.23-P2|ARHGEF37_-_148931256.23-P2	ARHGEF37	0.597438	0.223707	-0.292696	0.152328	0.044103	1.35553	0.692433	2.49526	False	False		Adck3	0.320395	0.494314	-0.207246	0.338725	0.178982	0.747192	0.540887	0.991111	False	False		Col11a1	1.24797	0.0964877	2.24332	1.03133	-0.309392	2.68314	False	False
ARHGEF38_+_106473860.23-P1P2|ARHGEF38_-_106473807.23-P1P2	ARHGEF38	0.049298	1.30717	-0.375487	1.14186	0.239245	0.621157	0.227222	0.375214	False	False		Adck4	0.000157716	3.80212	-1.62792	20.4652	0.000125497	3.90137	2.29588	21.9659	True	True		Col18a1	0.352821	-0.0370053	0.243239	1.72739	0.195767	2.8436	False	False
ARHGEF39_-_35665151.23-P1P2|ARHGEF39_-_35665155.23-P1P2	ARHGEF39	0.151638	0.819193	-0.0280311	0.0534206	0.206803	0.684443	0.117475	0.213753	False	False		Adck5	0.0657641	1.18201	-0.362422	1.41642	0.730258	0.136524	0.0583501	0.0195359	False	False		Col19a1	0.174981	-0.0166297	0.0542113	0.125156	-0.060135	0.0632872	False	False
ARHGEF4_-_131792637.23-P1P2|ARHGEF4_-_131792624.23-P1P2	ARHGEF4	0.386947	0.412349	0.0276423	0.0265169	0.904957	0.0433722	-0.106031	0.0122256	False	False		Adcy1	0.728901	0.137331	-0.194506	0.08832	0.820317	0.0860184	-0.242771	0.051212	False	False		Col1a1	0.470048	0.0413818	0.362381	0.379225	-0.0459928	0.146665	False	False
ARHGEF40_-_21538483.23-P1P2|ARHGEF40_-_21538491.23-P1P2	ARHGEF40	0.978835	0.00929033	-0.17993	0.00388882	0.660466	0.18015	0.173273	0.0829835	False	False		Adcy10	0.937971	0.0278105	-0.253435	0.0233041	0.769227	0.113945	0.722718	0.201953	False	False		Col1a2	0.0134194	0.0104611	0.00261532	0.17575	-0.0827542	0.122299	False	False
ARHGEF5_-_144052658.23-P1P2|ARHGEF5_+_144052875.23-P1P2	ARHGEF5	0.0155007	1.80965	-0.403976	1.70072	0.101242	0.994638	0.391269	1.03459	False	False		Adcy2	0.738668	0.131551	-0.215434	0.0937054	0.724146	0.140174	-0.155596	0.0534873	False	False		Col2a1	0.493053	-0.0936248	0.86	0.0207231	-0.05983	0.0104259	False	False
ARHGEF6_-_135863048.23-P1P2|ARHGEF6_+_135863011.23-P1P2	ARHGEF6	0.220235	0.657114	-0.0177546	0.0271416	0.876618	0.0571894	-0.0581363	0.00883875	False	False		Adcy3	0.586924	0.231418	0.0101744	0.00778509	0.293149	0.532912	0.367466	0.480237	False	False		Col3a1	0.522415	0.0647009	0.629709	0.0758719	-0.0274068	0.0174855	False	False
ARHGEF7_-_111767696.23-ENST00000370623.3|ARHGEF7_+_111767892.23-ENST00000370623.3	ARHGEF7	0.629797	0.2008	-0.104537	0.0488333	0.0757232	1.12077	0.706995	2.1065	False	False		Adcy4	0.1381	0.859806	-1.08889	3.09558	0.895743	0.0478166	0.308249	0.0361464	False	False		Col4a1	0.410789	-0.0423895	0.324407	1.69259	0.219567	3.12505	False	False
ARHGEF9_+_62974948.23-P1P2|ARHGEF9_+_62974965.23-P1P2	ARHGEF9	0.561666	0.250522	-0.0130609	0.00761206	0.753469	0.122935	0.0755133	0.0246789	False	False		Adcy5	0.331036	0.480125	-0.249519	0.39611	0.838477	0.0765086	-0.226498	0.0424971	False	False		Col4a2	0.389343	-0.0865973	0.628131	0.119912	0.0171724	0.0173154	False	False
ARID1A_-_27022766.23-P1P2|ARID1A_-_27022545.23-P1P2	ARID1A	0.0109727	1.95969	-1.49083	6.79672	0.752363	0.123573	-0.214904	0.0705985	False	False		Adcy6	0.868371	0.0612946	0.059905	0.0121407	0.506728	0.295225	-0.26936	0.195016	False	False		Col4a3	0.126748	0.0418936	0.0989243	0.245571	-0.140254	0.289621	False	False
ARID1B_+_157098803.23-P1|ARID1B_-_157099145.23-P1	ARID1B	0.663768	0.177984	-0.00726807	0.00300942	0.379926	0.420301	0.346705	0.38739	False	False		Adcy7	0.201919	0.694824	0.244891	0.562606	0.921709	0.035406	0.0484776	0.00420922	False	False		Col4a4	0.426625	-0.0201394	0.160069	0.835586	-0.160481	1.12759	False	False
ARID1B_+_157100315.23-P2|ARID1B_-_157100366.23-P2	ARID1B	0.161249	0.792502	0.239856	0.442217	0.888115	0.0515308	-0.0904834	0.0123955	False	False		Adcy8	0.285907	0.543775	-0.250383	0.450174	0.463497	0.333953	0.187255	0.153357	False	False		Col4a6	0.0639218	9.96008e-05	0.000118611	0.0680426	0.0252715	0.0144594	False	False
ARID2_-_46123531.23-P1P2|ARID2_+_46123520.23-P1P2	ARID2	0.0340411	1.468	-0.720149	2.45941	0.862203	0.0643905	-0.108868	0.0186358	False	False		Adcy9	0.583951	0.233623	0.10846	0.083781	0.803378	0.0950801	0.0526115	0.0122674	False	False		Col5a1	0.24473	-0.0409372	0.186646	0.614132	-0.00319685	0.0165091	False	False
ARID3A_+_926082.23-P1P2|ARID3A_-_926025.23-P1P2	ARID3A	0.315016	0.501668	-0.917408	1.07069	0.349153	0.456985	1.13302	1.37648	False	False		Adcyap1	0.789218	0.102803	0.114836	0.0390339	0.0467111	1.33058	-0.733339	2.39293	False	False		Col5a3	1.05162	-0.133117	2.60798	0.901909	0.161026	1.22123	False	False
ARID3B_-_74833936.23-P1P2|ARID3B_+_74833663.23-P1P2	ARID3B	0.0112329	1.94951	0.237308	1.07627	0.955136	0.0199346	-0.0422644	0.0022398	False	False		Adcyap1r1	0.331036	0.480125	0.152241	0.241681	0.179689	0.745479	-0.724788	1.32504	False	False		Col6a2	0.197532	0.0229761	0.0845528	1.25108	0.321422	3.38143	False	False
ARID3C_-_34628471.23-P1P2|ARID3C_-_34628531.23-P1P2	ARID3C	0.124612	0.904441	0.178854	0.376324	0.051973	1.28422	0.569646	1.94479	False	False		Add1	0.365456	0.437165	0.153509	0.221889	0.470631	0.32732	0.0617651	0.0495792	False	False		Col7a1	0.0642095	0.0015357	0.00183705	0.573647	-0.159383	0.76882	False	False
ARID4A_-_58765292.23-P1P2|ARID4A_+_58765344.23-P1P2	ARID4A	0.333004	0.47755	-0.389517	0.432742	0.46047	0.336799	-0.405907	0.363434	False	False		Add2	0.92537	0.0336848	-0.0422849	0.00470953	0.625202	0.20398	0.0829483	0.0414933	False	False		Col9a3	0.494989	0.022894	0.211121	0.453275	0.0976077	0.372035	False	False
ARID4B_+_235491249.23-P1P2|ARID4B_-_235491474.23-P1P2	ARID4B	0.18508	0.732641	-0.940708	1.60335	0.0811741	1.09058	-1.10907	3.21547	False	False		Add3	0.608935	0.215429	-0.0634454	0.0451921	0.168843	0.772516	-0.500764	0.94869	False	False		Commd1	0.304474	-0.0160181	0.0908605	0.266005	0.0629153	0.140729	False	False
ARID5A_-_97202536.23-P1P2|ARID5A_+_97202543.23-P1P2	ARID5A	0.232409	0.633748	-0.00844874	0.0124564	0.0200897	1.69703	0.0581954	0.262546	False	False		Adgb	0.105739	0.975767	-0.338192	1.09111	0.651728	0.185934	-0.018099	0.0082527	False	False		Commd4	0.566706	0.0631113	0.666314	0.028396	-0.0409652	0.00978161	False	False
ARID5B_-_63660959.23-ENST00000279873.7|ARID5B_+_63661162.23-ENST00000279873.7	ARID5B	0.0337145	1.47218	-1.22222	4.18595	0.661304	0.179599	-0.33544	0.160158	False	False		Adh1	0.954606	0.0201759	-0.00979874	0.000653674	0.730586	0.136329	-0.055722	0.0186294	False	False		Commd5	0.324188	-0.00498351	0.0300986	0.373868	6.3413e-05	0.000199359	False	False
ARIH1_-_72766733.23-P1P2|ARIH1_-_72766686.23-P1P2	ARIH1	0.120436	0.919243	-6.29842	13.4693	0.160604	0.794244	-3.14154	6.63323	True	False		Adh4	0.718639	0.143489	0.0758404	0.0359813	0.939648	0.0270349	-0.0439735	0.00291541	False	False		Comp	0.498871	0.0351052	0.326267	0.694011	-0.153876	0.897997	False	False
ARIH2_+_48956345.23-P1P2|ARIH2_-_48956298.23-P1P2	ARIH2	0.19058	0.719923	0.502778	0.842066	0.621875	0.206297	0.143092	0.078476	False	False		Adh5	0.474738	0.323546	0.203887	0.218114	0.703932	0.15247	-0.397356	0.148575	False	False		Comt	0.661893	-0.0633401	0.781052	0.52617	0.0707602	0.313079	False	False
ARIH2OS_+_48956620.23-P1P2|ARIH2OS_-_48956929.23-P1P2	ARIH2OS	0.0909825	1.04104	0.270996	0.65632	0.0817738	1.08739	-0.675997	1.95415	False	False		Adh6a	0.123076	0.909826	0.268238	0.806932	0.0707765	1.15011	-0.555943	1.56803	False	False		Comtd1	0.791452	-0.0676405	0.997344	0.747237	0.0605048	0.380178	False	False
ARL1_+_101801468.23-P1P2|ARL1_+_101801462.23-P1P2	ARL1	0.00290826	2.53637	-4.0539	23.9204	0.525789	0.279188	-0.20986	0.15576	True	False		Adh6b	0.641588	0.192743	-0.171217	0.109115	0.298192	0.525505	0.318834	0.41089	False	False		Cops2	1.1366	-0.22408	4.74489	0.666921	0.0651294	0.36525	False	False
ARL10_+_175792529.23-P1P2|ARL10_-_175792511.23-P1P2	ARL10	0.552844	0.257397	0.0381166	0.0228245	0.683887	0.165016	0.0600821	0.0263572	False	False		Adh7	0.0428918	1.36763	-0.544861	2.46383	0.22967	0.638895	0.25195	0.394754	False	False		Cops5	0.419849	-0.06127	0.479242	0.0722492	0.104686	0.0636007	False	False
ARL11_-_50202704.23-P1P2|ARL11_+_50202693.23-P1P2	ARL11	0.0301013	1.52141	-1.13212	4.00703	0.0173648	1.76033	0.491448	2.29985	False	False		Adhfe1	0.772074	0.112341	0.0395477	0.0146899	0.768671	0.11426	0.317818	0.0890543	False	False		Coq6	0.196102	0.019297	0.0704996	0.206168	0.169544	0.293928	False	False
ARL13A_+_100224727.23-P1P2|ARL13A_-_100224705.23-P1P2	ARL13A	0.953174	0.0208278	-0.158809	0.0076949	0.52093	0.28322	-0.761391	0.573272	False	False		Adi1	0.983903	0.00704757	0.108783	0.00253488	0.386311	0.413063	-0.337504	0.341883	False	False		Coro6	0.0144685	0.00877653	0.0023657	0.118608	-0.0223746	0.0223155	False	False
ARL13B_-_93699034.23-P1P2|ARL13B_-_93699028.23-P1P2	ARL13B	0.55576	0.255113	-0.450567	0.267409	0.592988	0.226954	-0.369765	0.223096	False	False		Adig	0.586924	0.231418	-0.187252	0.143279	0.294153	0.531427	0.374585	0.488177	False	False		Cox19	1.18169	0.0579388	1.27552	0.410098	0.050298	0.173451	False	False
ARL14_+_160395022.23-P1P2|ARL14_-_160394974.23-P1P2	ARL14	0.75628	0.121318	-0.100704	0.028422	0.772169	0.112288	-0.179021	0.0534398	False	False		Adipoq	0.402027	0.395745	0.238466	0.312032	0.230518	0.637294	0.141917	0.221798	False	False		Cox4i1	0.568754	-0.0763846	0.809364	0.311697	0.0773784	0.202811	False	False
ARL14EP_+_30344985.23-P1P2|ARL14EP_-_30344694.23-P1P2	ARL14EP	0.0696583	1.15703	-0.802375	2.15975	0.103127	0.986629	0.722304	1.89453	False	False		Adipor1	0.570662	0.243621	-0.785689	0.632883	0.605237	0.218074	0.163976	0.087694	False	False		Cox5a	0.993192	-0.0773901	1.43196	0.730856	0.145653	0.895135	False	False
ARL14EPL_-_115387369.23-ENST00000601302.2|ARL14EPL_-_115387263.23-ENST00000601302.2	ARL14EPL	0.935558	0.0289291	-0.161637	0.0108783	0.809937	0.0915485	-0.134621	0.0327636	False	False		Adipor2	0.117741	0.929073	-0.351937	1.08112	0.57212	0.242513	0.268087	0.159439	False	False		Cox5b	0.084315	-0.0495738	0.0778701	0.065075	-0.0396198	0.0216803	False	False
ARL15_-_53606154.23-P1P2|ARL15_-_53605934.23-P1P2	ARL15	0.179192	0.746681	-0.670608	1.1649	0.635781	0.196692	-0.366051	0.191407	False	False		Adk	0.237227	0.624835	-0.240065	0.495967	0.744865	0.127923	0.0137212	0.00430452	False	False		Cox6a2	0.0538604	0.0100461	0.0100805	0.040706	-0.0458278	0.0156865	False	False
ARL16_+_79650729.23-P1P2|ARL16_+_79650784.23-P1P2	ARL16	0.0024624	2.60864	-1.97681	11.9967	0.0899538	1.04598	-0.623547	1.73389	True	False		Adm	0.0719827	1.14277	0.406921	1.53754	0.269111	0.570068	-0.406505	0.568298	False	False		Cox6b1	0.117767	0.016549	0.0363085	0.00156033	-0.0281108	0.000368831	False	False
ARL2_-_64781781.23-P1P2|ARL2_+_64781852.23-P1P2	ARL2	0.000634953	3.19726	-5.922	44.0483	0.0265754	1.57552	-1.10373	4.62291	True	False		Adm2	0.288518	0.539827	-0.484096	0.86406	0.00206869	2.6843	0.917972	6.0429	False	False		Cox6c	0.0735798	-0.0264214	0.0362183	0.778084	0.217291	1.4217	False	False
ARL2BP_-_57279168.23-P1P2|ARL2BP_-_57279134.23-P1P2	ARL2BP	0.789627	0.102578	-0.20396	0.0486723	0.979216	0.0091216	-0.0277414	0.000672709	False	False		Adnp	0.188747	0.724119	-0.378576	0.906401	0.279982	0.55287	-0.373698	0.506673	False	False		Cox7a1	0.222256	-0.0700622	0.290102	0.213595	-0.111234	0.199787	False	False
ARL3_+_104474107.23-P1P2|ARL3_-_104474089.23-P1P2	ARL3	0.480381	0.318414	0.124277	0.0920591	0.385162	0.414357	-0.24309	0.267774	False	False		Adnp2	0.417167	0.37969	0.233683	0.293369	0.139448	0.855588	-0.767665	1.61072	False	False		Cox7b	0.827238	-0.0498464	0.768207	0.325178	0.0736448	0.201373	False	False
ARL4A_-_12726525.23-P1P2|ARL4A_-_12727353.23-P1P2	ARL4A	0.344317	0.463041	-0.35311	0.380377	0.527937	0.277418	0.114747	0.0846262	False	False		Ado	0.983329	0.00730136	-0.113276	0.00273463	0.257308	0.589546	-0.393525	0.56895	False	False		Cox7c	0.72427	-0.0462127	0.623556	0.93286	0.157721	1.23721	False	False
ARL4C_+_235405676.23-P1P2|ARL4C_+_235405481.23-P1P2	ARL4C	0.339372	0.469324	0.0154708	0.0168915	0.902938	0.0443421	-0.0549326	0.00647552	False	False		Adora1	0.465437	0.332139	-0.41798	0.459022	0.431724	0.364794	0.597198	0.534257	False	False		Cox8a	0.876061	0.0571896	0.933394	0.32179	-0.0652635	0.176596	False	False
ARL4D_-_41476546.23-P1P2|ARL4D_-_41476396.23-P1P2	ARL4D	0.359357	0.444474	0.0638099	0.0659809	0.160823	0.793652	-0.284012	0.599233	False	False		Adora2a	0.633356	0.198352	0.169031	0.110856	0.559804	0.251964	-0.120763	0.07462	False	False		Cp	0.392888	-0.0813547	0.595477	0.0163943	-0.0421351	0.00580866	False	False
ARL5A_+_152684919.23-P1P2|ARL5A_+_152684710.23-P1P2	ARL5A	0.0812643	1.0901	0.755277	1.91539	0.0502806	1.2986	-0.635646	2.19441	False	False		Adora2b	0.485491	0.313819	-0.138295	0.143497	0.036674	1.43564	0.757228	2.66598	False	False		Cpa1	0.028779	-0.0136177	0.00730117	0.0940368	-0.0305934	0.0241915	False	False
ARL5B_-_18948344.23-P1P2|ARL5B_-_18948348.23-P1P2	ARL5B	0.727971	0.137886	-0.117919	0.0378259	0.145235	0.837928	-0.319636	0.712018	False	False		Adora3	0.0172453	1.76333	0.635981	3.70796	0.109081	0.962252	-0.715733	1.68898	False	False		Cpb1	0.084315	-0.0511471	0.0803415	0.0328365	0.0425898	0.0117598	False	False
ARL5C_+_37322383.23-P1P2|ARL5C_-_37322341.23-P1P2	ARL5C	0.367282	0.435	0.117637	0.119047	0.298654	0.524832	0.231746	0.323341	False	False		Adpgk	0.110321	0.957341	-0.382821	1.21177	0.667013	0.175866	0.161237	0.0695392	False	False		Cpd	0.526381	-0.0388999	0.381472	0.449455	-0.0542433	0.205008	False	False
ARL6_-_97483565.23-P1P2|ARL6_+_97483472.23-P1P2	ARL6	0.248213	0.605176	0.362703	0.510642	0.96904	0.0136584	-0.0523538	0.00190097	False	False		Adprh	0.611965	0.213274	0.0605945	0.0427295	0.0313414	1.50388	-0.757711	2.79448	False	False		Cpe	0.301228	0.0285476	0.160206	0.156159	-0.062731	0.0823737	False	False
ARL6IP1_-_18809346.23-P2|ARL6IP1_-_18809283.23-P2	ARL6IP1	0.711746	0.147675	-0.274294	0.0942336	0.692613	0.15951	-0.136051	0.0576923	False	False		Adprhl1	0.851391	0.0698712	-0.111802	0.0258288	0.697458	0.156482	-0.259161	0.0994529	False	False		Cpne8	0.174981	-0.0302494	0.0986103	0.504052	-0.182488	0.773477	False	False
ARL6IP1_+_18812826.23-P1|ARL6IP1_+_18812823.23-P1	ARL6IP1	0.495845	0.304654	0.0306702	0.0217374	0.10611	0.974244	-0.391679	1.01444	False	False		Adprhl2	0.241928	0.616315	-0.136739	0.278646	0.010303	1.98704	-0.742902	3.62011	False	False		Cps1	0.206168	-0.025019	0.0960957	0.563184	0.170175	0.805907	False	False
ARL6IP4_-_123465296.23-P1P2|ARL6IP4_+_123465234.23-P1P2	ARL6IP4	0.142726	0.845496	-0.62535	1.23004	0.350916	0.454797	-0.581165	0.70266	False	False		Adprm	0.818763	0.086842	-0.0721984	0.0207307	0.35785	0.4463	-0.134587	0.147303	False	False		Cpt1a	0.228188	-0.0101244	0.0430405	0.439962	-0.10348	0.382835	False	False
ARL6IP5_-_69134175.23-P1P2|ARL6IP5_-_69134411.23-P1P2	ARL6IP5	0.485218	0.314063	-0.435718	0.318351	0.517599	0.286007	-0.215629	0.16395	False	False		Adra1a	0.476516	0.321923	-0.163828	0.17438	0.8729	0.0590354	0.0362022	0.00524121	False	False		Cpt1b	1.62886	-0.0986533	2.99371	0.0614006	-0.0418489	0.021607	False	False
ARL6IP6_-_153574693.23-P1P2|ARL6IP6_-_153574615.23-P1P2	ARL6IP6	0.00347539	2.459	-1.75566	10.0434	0.764819	0.116441	0.0910618	0.0281885	True	False		Adra1b	0.078354	1.10594	0.319832	1.16953	0.894015	0.048655	-0.0571674	0.00682118	False	False		Cpt2	0.699474	0.0786105	1.02439	0.0418405	-0.0495927	0.0174483	False	False
ARL8A_-_202113804.23-P1P2|ARL8A_+_202113836.23-P1P2	ARL8A	0.0308788	1.51034	-3.07779	10.8143	0.465939	0.331671	0.373275	0.329128	True	False		Adra1d	0.396386	0.401882	-0.151899	0.201841	0.208658	0.680565	-0.299954	0.50062	False	False		Crat	0.604037	0.00759966	0.0855207	0.3201	-0.117717	0.316857	False	False
ARL8B_+_5164015.23-P1P2|ARL8B_+_5164028.23-P1P2	ARL8B	0.0226038	1.64582	0.595003	2.27816	0.680664	0.167067	0.0989908	0.0439657	False	False		Adra2a	0.265907	0.57527	-0.434605	0.826654	0.5657	0.247414	0.0920383	0.055844	False	False		Crb2	0.146427	0.0143602	0.039174	0.0475518	0.000937081	0.000374698	False	False
ARL9_+_57371636.23-P1P2|ARL9_-_57371648.23-P1P2	ARL9	0.562216	0.250097	-0.240887	0.140154	0.619368	0.208051	0.143701	0.07948	False	False		Adra2b	0.816523	0.0880314	-0.264994	0.0771314	0.186877	0.728443	0.332469	0.593924	False	False		Creb1	1.34007	-0.094189	2.35148	0.143854	-0.0968036	0.117098	False	False
ARMC1_-_66546391.23-P1P2|ARMC1_+_66546422.23-P1P2	ARMC1	0.514785	0.288374	-0.0323667	0.0217139	0.789191	0.102818	0.0175202	0.00478892	False	False		Adra2c	0.74684	0.126772	-0.0345639	0.0144879	0.217215	0.663111	-0.329309	0.535518	False	False		Crebbp	0.913512	0.0967223	1.64609	0.33199	0.074611	0.208289	False	False
ARMC10_+_102715597.23-P1P2|ARMC10_-_102715615.23-P1P2	ARMC10	0.109687	0.959843	0.38222	0.853488	0.442285	0.354298	-0.286603	0.269946	False	False		Adrb1	0.401338	0.396489	-0.273684	0.358789	0.0260536	1.58413	0.921774	3.58096	False	False		Crh	0.35796	0.049711	0.331514	0.00364947	0.0101527	0.000311565	False	False
ARMC12_-_35704889.23-P1P2|ARMC12_+_35704899.23-P1P2	ARMC12	0.862308	0.0643374	-0.211254	0.0316193	0.0163579	1.78627	0.536346	2.54696	False	False		Adrb2	0.800334	0.0967288	-0.193771	0.0619729	0.231653	0.635163	-0.406135	0.632615	False	False		Crispld1	0.168076	-0.025282	0.0791644	1.07811	-0.28459	2.58001	False	False
ARMC2_+_109169685.23-P1P2|ARMC2_-_109169691.23-P1P2	ARMC2	0.228138	0.641803	0.134581	0.200941	0.344125	0.463284	-0.416145	0.512531	False	False		Adrb3	0.00774074	2.11122	-0.541235	3.77813	0.185181	0.732403	0.597956	1.074	False	False		Crk	1.15904	-0.105793	2.28438	1.39206	0.165656	1.9391	False	False
ARMC3_-_23217021.23-P1P2|ARMC3_-_23217031.23-P1P2	ARMC3	0.43372	0.362791	-0.0253412	0.0213878	0.734362	0.13409	0.128749	0.0458952	False	False		Adrbk1	0.0370431	1.43129	-0.886453	4.19509	0.237962	0.623493	0.553929	0.846972	False	False		Crkl	1.11161	-0.0417044	0.863667	0.17575	-0.0835095	0.123415	False	False
ARMC4_-_28287610.23-P1P2|ARMC4_-_28287617.23-P1P2	ARMC4	0.672885	0.172059	-0.283226	0.113369	0.0115988	1.93559	-0.5539	2.85018	False	False		Adrbk2	0.913358	0.039359	-0.447757	0.0582699	0.860727	0.0651347	0.215357	0.0343997	False	False		Crnkl1	0.0688745	-0.0947932	0.121632	0.0955966	0.0271206	0.0218012	False	False
ARMC5_-_31470848.23-P1P2|ARMC5_+_31470860.23-P1P2	ARMC5	0.109001	0.962569	-0.402515	0.901359	0.337661	0.471519	-0.21085	0.264302	False	False		Adrm1	0.299792	0.52318	-0.313208	0.541803	0.191539	0.717744	-0.350482	0.616905	False	False		Crocc	0.25236	-0.0258644	0.121601	0.245571	0.042186	0.0871132	False	False
ARMC6_+_19144442.23-P1P2|ARMC6_-_19144470.23-P1P2	ARMC6	0.463266	0.334169	0.0340486	0.0264697	0.975031	0.0109815	-0.024013	0.000701032	False	False		Adsl	0.200395	0.698114	-0.0415977	0.0960181	0.0199036	1.70107	1.23827	5.16561	False	False		Crot	0.71521	0.0272471	0.363051	0.28044	-0.145222	0.34246	False	False
ARMC7_+_73106080.23-P1P2|ARMC7_-_73106057.23-P1P2	ARMC7	0.00870948	2.06001	-4.37021	20.9438	0.475314	0.323019	-1.44076	1.23722	True	False		Adss	0.81149	0.0907167	0.0782316	0.0234654	0.718576	0.143527	0.108111	0.038053	False	False		Crp	0.293163	-0.0577263	0.31528	0.0868831	-0.072879	0.0532447	False	False
ARMC8_-_137906385.23-P1P2|ARMC8_-_137906605.23-P1P2	ARMC8	0.975076	0.0109614	-0.176192	0.00449298	0.089256	1.04936	0.623119	1.7383	False	False		Adssl1	0.673372	0.171745	0.0490164	0.0278345	0.541817	0.266148	0.0287991	0.0187968	False	False		Crtc1	0.00717552	0.0535909	0.00716405	0.0196371	-0.00413108	0.000682149	False	False
ARMC9_+_232063449.23-P1P2|ARMC9_+_232063422.23-P1P2	ARMC9	0.774703	0.110865	-0.238194	0.061434	0.818066	0.0872119	0.0821017	0.0190351	False	False		Adtrp	0.570662	0.243621	0.0312418	0.0251657	0.131445	0.881255	-0.489891	1.05873	False	False		Crybb1	0.151775	0.00966587	0.027331	0.028396	-0.00119076	0.000284327	False	False
ARMCX1_-_100805594.23-P1P2|ARMCX1_-_100805586.23-P1P2	ARMCX1	0.0558865	1.25269	-1.43674	4.18704	0.0408807	1.38848	0.537781	1.98506	False	False		Aebp1	0.508773	0.293476	0.0801663	0.0777897	0.509996	0.292434	-0.169107	0.121275	False	False		Cryl1	0.351114	-0.0433126	0.283319	0.137114	0.0630097	0.0726487	False	False
ARMCX2_-_100914798.23-P1P2|ARMCX2_-_100914849.23-P1P2	ARMCX2	0.124193	0.905902	0.545638	1.14992	0.516133	0.287238	-0.334993	0.255803	False	False		Aebp2	0.161717	0.791244	-0.404902	1.0593	0.370938	0.430699	-0.203523	0.214966	False	False		Cryz	0.0795184	-0.0283079	0.0419362	0.167287	0.0141155	0.0198562	False	False
ARMCX3_+_100878194.23-P1P2|ARMCX3_+_100878168.23-P1P2	ARMCX3	0.134381	0.871662	0.0912024	0.184943	0.517285	0.28627	-0.220313	0.167666	False	False		Aen	0.205765	0.686628	-0.269286	0.611355	0.59612	0.224666	0.107319	0.0591287	False	False		Cs	0.103911	-0.0379439	0.0734545	0.300057	0.0673655	0.169973	False	False
ARMCX4_-_100740511.23-P1P2|ARMCX4_-_100740693.23-P1P2	ARMCX4	0.0599719	1.22205	-1.92362	5.46881	0.12939	0.888098	-0.962991	2.27359	False	False		Aes	0.619568	0.207911	0.200984	0.138165	0.479181	0.319501	-0.256297	0.200816	False	False		Csad	0.382288	0.0179302	0.1277	0.17575	0.0203606	0.03009	False	False
ARMCX6_-_100872930.23-P1P2|ARMCX6_-_100872948.23-P1P2	ARMCX6	0.842863	0.0742428	-0.0875566	0.0151226	0.577549	0.238411	-0.103447	0.0655649	False	False		Afap1	0.966664	0.0147243	-0.629283	0.0306364	0.0654967	1.18378	0.930431	2.70109	False	False		Csf1	0.820024	-0.0638571	0.975551	0.393644	0.0391645	0.129639	False	False
ARMS2_+_124214237.23-P1P2|ARMS2_+_124214219.23-P1P2	ARMS2	0.33957	0.469071	0.0390073	0.0425666	0.758756	0.119898	-0.109002	0.0347433	False	False		Afap1l1	0.0740575	1.13043	0.425564	1.59062	0.591083	0.228352	0.13961	0.0781819	False	False		Csf1r	0.0952569	0.020639	0.0366268	0.594812	0.0899059	0.449682	False	False
ARNT_+_150849017.23-P1P2|ARNT_+_150849012.23-P1P2	ARNT	0.00680048	2.16746	-2.4554	12.381	0.42186	0.374832	-0.331098	0.329929	True	False		Afap1l2	0.833916	0.0788776	-0.0436892	0.0113942	0.301245	0.52108	-0.402174	0.513929	False	False		Csf2	0.418031	-0.01656	0.128968	0.285305	0.0553003	0.132671	False	False
ARNT2_-_80696751.23-P1P2|ARNT2_+_80696737.23-P1P2	ARNT2	0.743692	0.128607	-0.254832	0.0762434	0.642408	0.192189	-0.333305	0.170293	False	False		Aff1	0.524613	0.280161	0.084397	0.0781793	0.0898382	1.04654	-0.644008	1.65284	False	False		Csf2ra	0.153119	-0.00953539	0.0272008	0.074767	0.0256847	0.0161481	False	False
ARNTL_+_13299385.23-P1P2|ARNTL_-_13299382.23-P1P2	ARNTL	0.782542	0.106493	-0.111087	0.0275212	0.109626	0.960085	0.310365	0.792156	False	False		Aff2	0.0708507	1.14966	0.119398	0.45386	0.993611	0.0027838	-0.0722975	0.000493566	False	False		Csf2rb	0.0403756	-0.00227294	0.00170971	0.245571	-0.0527144	0.108854	False	False
ARNTL2_+_27485837.23-P1P2|ARNTL2_+_27485847.23-P1P2	ARNTL2	0.292059	0.534529	0.0656969	0.0816959	0.605353	0.217991	0.118674	0.0687736	False	False		Aff3	0.214947	0.667668	-0.393233	0.868096	0.219666	0.658237	0.534439	0.862709	False	False		Csf2rb2	0.149096	-0.0132966	0.0369334	0.100635	0.033829	0.0286269	False	False
ARPC1A_+_98923614.23-P1P2|ARPC1A_-_98923643.23-P1P2	ARPC1A	0.436722	0.359795	0.113509	0.0950097	0.832526	0.079602	-0.0769054	0.0162746	False	False		Aff4	0.0926121	1.03333	-0.766602	2.61919	0.884811	0.0531494	-0.382831	0.0498987	False	False		Csf3	0.02941	-0.0183331	0.0100449	0.787687	0.131404	0.870365	False	False
ARPC1B_-_98972410.23-P1P2|ARPC1B_-_98972364.23-P1P2	ARPC1B	0.00390831	2.40801	-5.56985	31.2022	0.134744	0.870491	-4.27112	9.88404	True	False		Afg3l1	0.812049	0.0904177	-0.136098	0.0406877	0.161527	0.791754	0.510748	0.991701	False	False		Csf3r	0.173595	-0.0392219	0.126847	0.858882	0.133773	0.966137	False	False
ARPC2_-_219081923.23-P1|ARPC2_-_219081929.23-P1	ARPC2	0.000338367	3.47061	-1.55035	12.5176	0.969799	0.0133182	-0.0483391	0.00171148	True	False		Afg3l2	0.778145	0.108939	-0.344809	0.1242	0.911889	0.0400583	-0.115851	0.0113808	False	False		Csgalnact2	0.00408596	-0.00876742	0.00066739	0.0163943	0.0296208	0.00408346	False	False
ARPC2_+_219103598.23-P2|ARPC2_-_219103608.23-P2	ARPC2	0.0820277	1.08604	0.121182	0.306172	0.740061	0.130733	-0.0974478	0.0338676	False	False		Afm	0.68128	0.166674	-0.139776	0.07703	0.48599	0.313373	0.357794	0.274965	False	False		Csk	0.878535	0.0771857	1.26331	0.0881199	0.0168991	0.012522	False	False
ARPC3_-_110883364.23-P2|ARPC3_+_110883121.23-P2	ARPC3	0.608705	0.215593	-0.115753	0.0580568	0.603655	0.219211	0.216009	0.125882	False	False		Afmid	0.192655	0.71522	0.481358	1.13832	0.0211742	1.67419	-0.679045	2.78797	False	False		Csmd3	0.260421	0.053307	0.258627	0.285189	0.0343708	0.0824253	False	False
ARPC3_+_110888087.23-P1|ARPC3_-_110888115.23-P1	ARPC3	0.0114986	1.93935	-1.8873	8.51494	0.20346	0.691521	0.239606	0.440485	False	False		Afp	0.949441	0.0225321	0.0428896	0.00319529	0.518447	0.285295	-0.315951	0.221054	False	False		Csnk1a1	0.278824	0.0149195	0.0774993	0.56527	-0.219651	1.04406	False	False
ARPC4_-_9834808.23-P1P2|ARPC4_-_9834275.23-P1P2	ARPC4	0.0012763	2.89405	-3.73027	25.1148	0.492337	0.307737	0.354736	0.290211	True	False		Aftph	0.661315	0.179591	-0.287566	0.170758	0.961678	0.0169704	0.024526	0.00102071	False	False		Csnk1d	0.786734	-0.0367987	0.539355	0.640295	-0.0879865	0.473734	False	False
ARPC4-TTLL3_-_9834275.23-P1|ARPC4-TTLL3_+_9834261.23-P1	ARPC4-TTLL3	0.0050368	2.29784	-1.15516	6.17513	0.163686	0.785987	0.418702	0.87488	False	False		Aga	0.585437	0.23252	0.195638	0.150408	0.153612	0.813576	-0.257058	0.512876	False	False		Csnk1e	0.306101	0.0441718	0.251897	0.492148	0.0742326	0.307205	False	False
ARPC4-TTLL3_+_9839357.23-P2|ARPC4-TTLL3_+_9839379.23-P2	ARPC4-TTLL3	0.0206363	1.68537	0.569681	2.23363	0.480576	0.318238	-0.1203	0.101776	False	False		Agap1	0.0824685	1.08371	0.304957	1.09272	0.669132	0.174488	0.179824	0.0769477	False	False		Csnk1g1	0.0218797	-0.0151641	0.0061812	1.67877	-0.15196	2.14516	False	False
ARPC5_+_183604818.23-P1P2|ARPC5_-_183604444.23-P1P2	ARPC5	0.538363	0.268925	-0.0563805	0.035273	0.919967	0.0362276	-0.0018562	0.000178769	False	False		Agap2	0.181108	0.742063	-0.37562	0.921609	0.282257	0.549356	0.405956	0.54691	False	False		Csnk1g2	1.39192	0.067269	1.74439	0.569453	-0.164925	0.789738	False	False
ARPC5L_-_127624450.23-P2|ARPC5L_+_127624418.23-P2	ARPC5L	0.0312158	1.50563	-2.98259	10.447	0.92364	0.0344972	0.0994366	0.00911924	True	False		Agap3	0.321097	0.493363	-0.780978	1.27398	0.672848	0.172083	0.150475	0.0635019	False	False		Csnk1g3	0.412595	-0.00261182	0.0200761	0.846409	0.10446	0.743481	False	False
ARPC5L_+_127631498.23-P1|ARPC5L_-_127631510.23-P1	ARPC5L	0.887686	0.0517408	-0.127031	0.0152907	0.741131	0.130105	-0.170477	0.0589644	False	False		Agbl1	0.591894	0.227756	0.22444	0.169016	0.906118	0.0428154	-0.0591372	0.00620932	False	False		Csnk2a1	0.491119	-0.0386097	0.353262	0.349229	-0.063854	0.187515	False	False
ARPP19_+_52861215.23-P1P2|ARPP19_+_52861067.23-P1P2	ARPP19	0.17984	0.745114	0.205873	0.356867	0.794788	0.0997484	-0.116582	0.0309149	False	False		Agbl2	0.476521	0.321918	0.160151	0.170464	0.407404	0.389974	-0.52855	0.505482	False	False		Csnk2a2	0.394665	-0.0611874	0.449888	0.0968521	0.0496885	0.0404672	False	False
ARPP21_-_35683772.23-ENST00000187397.4|ARPP21_-_35683895.23-ENST00000187397.4	ARPP21	0.463296	0.334142	0.0221848	0.0172453	0.119835	0.921418	-0.252047	0.6174	False	False		Agbl3	0.179234	0.746579	-0.266732	0.658428	0.458186	0.338958	0.321775	0.267475	False	False		Csnk2b	1.69945	-0.207731	6.57692	0.698571	-0.0416574	0.244704	False	False
ARR3_+_69488236.23-P1P2|ARR3_+_69488261.23-P1P2	ARR3	0.821006	0.0856537	-0.239975	0.0478185	0.87704	0.0569808	0.00399879	0.000605739	False	False		Agbl4	0.428424	0.368126	0.238578	0.290391	0.9327	0.0302581	0.238117	0.0176692	False	False		Cspp1	0.756373	0.0317774	0.447784	1.36079	-0.166071	1.9003	False	False
ARRB1_-_75062680.23-P1P2|ARRB1_+_75062646.23-P1P2	ARRB1	0.235024	0.628888	0.674284	0.986506	0.802039	0.0958043	-0.219416	0.0558833	False	False		Agbl5	0.818763	0.086842	-0.0256582	0.00736739	0.0755583	1.12172	1.02405	2.81702	False	False		Csrnp1	0.326914	-0.0259823	0.158243	0.24605	-0.0218836	0.0452773	False	False
ARRB2_-_4614022.23-P1P2|ARRB2_-_4614048.23-P1P2	ARRB2	0.0240026	1.61974	-3.64224	13.7245	0.817486	0.0875197	0.201109	0.0467913	True	False		Ager	0.633628	0.198166	-0.204361	0.133901	0.626078	0.203371	-0.0529705	0.0264185	False	False		Csrp2bp	0.550431	-0.108029	1.10779	0.838965	0.212526	1.49932	False	False
ARRDC1_+_140500210.23-P1P2|ARRDC1_+_140500153.23-P1P2	ARRDC1	0.246243	0.608636	0.128578	0.182057	0.299115	0.524162	-0.644191	0.897653	False	False		Agfg1	0.564802	0.248104	-0.338121	0.277372	0.897971	0.0467376	0.0176982	0.00202853	False	False		Cst10	0.070047	0.0560327	0.0731214	0.62063	-0.10427	0.544164	False	False
ARRDC2_-_18119049.23-P1|ARRDC2_+_18118989.23-P1	ARRDC2	0.556094	0.254852	-0.222179	0.131727	0.0752167	1.12369	0.571573	1.70744	False	False		Agfg2	0.353742	0.451313	-0.429515	0.640935	0.151316	0.820115	-0.564351	1.13503	False	False		Cst3	0.533686	-0.057516	0.571857	0.0381651	-0.018985	0.00609278	False	False
ARRDC2_+_18111987.23-P2|ARRDC2_+_18111974.23-P2	ARRDC2	0.0934636	1.02936	0.0685071	0.164053	0.884794	0.0531578	0.0313903	0.004436	False	False		Aggf1	0.191918	0.716885	0.457419	1.08423	0.601178	0.220997	-0.199984	0.108384	False	False		Cst7	0.17637	-0.00899753	0.029564	0.0196371	-0.01311	0.00216481	False	False
ARRDC3_-_90679136.23-P1P2|ARRDC3_+_90679122.23-P1P2	ARRDC3	0.00926765	2.03303	0.184461	0.872435	0.227807	0.642434	0.529657	0.904589	False	False		Agk	0.0183549	1.73625	-2.75134	15.7948	0.0264168	1.57812	-0.761316	2.94638	True	False		Cst8	0.024019	-0.0314033	0.0140522	0.153405	-0.0185877	0.0239776	False	False
ARRDC4_+_98503956.23-P1P2|ARRDC4_+_98503988.23-P1P2	ARRDC4	0.0221022	1.65557	-3.57497	13.769	0.793622	0.100386	0.3156	0.0842247	True	False		Agl	0.66236	0.178906	-0.0371446	0.0219724	0.895743	0.0478166	0.170313	0.0199714	False	False		Csta	0.267829	-0.0271611	0.135525	0.56736	0.0536622	0.256015	False	False
ARRDC5_-_4902803.23-P1P2|ARRDC5_+_4902700.23-P1P2	ARRDC5	0.543848	0.264523	-0.445205	0.273972	0.131688	0.880454	0.429919	1.00629	False	False		Agmat	0.626701	0.202939	0.0465397	0.0312282	0.486902	0.312559	0.173806	0.133223	False	False		Cstb	0.0712221	0.0151212	0.0200638	0.00680188	-0.0538805	0.00308176	False	False
ARSA_+_51066539.23-P1P2|ARSA_+_51066550.23-P1P2	ARSA	0.473918	0.324297	-0.482276	0.363849	0.905027	0.0433385	-0.0181433	0.00209035	False	False		Agmo	0.111289	0.95355	0.33218	1.04731	0.723481	0.140573	-0.195845	0.0675148	False	False		Ctbp1	0.156641	0.0374574	0.109309	1.45878	-0.363978	4.46482	False	False
ARSB_+_78281066.23-P1P2|ARSB_+_78281107.23-P1P2	ARSB	0.822303	0.0849683	-0.219081	0.0433056	0.328147	0.483932	0.39705	0.510808	False	False		Ago1	0.967813	0.0142085	-0.307266	0.0144351	0.577082	0.238762	-0.216726	0.126899	False	False		Ctbp2	0.0915866	0.0464041	0.0791776	0.524144	0.097181	0.428322	False	False
ARSD_+_2847160.23-P1P2|ARSD_+_2847390.23-P1P2	ARSD	0.0334449	1.47567	-2.67258	9.17493	0.631081	0.199915	-0.328197	0.174424	False	False		Ago2	0.00106773	2.97154	-1.81912	17.8731	0.369771	0.432067	0.10433	0.110546	True	False		Ctcf	1.88781	-0.129769	4.56396	0.662451	0.11431	0.636759	False	False
ARSE_-_2882306.23-P1P2|ARSE_-_2882125.23-P1P2	ARSE	0.354781	0.450039	0.0885748	0.0927351	0.577521	0.238432	-0.13744	0.0871174	False	False		Ago3	0.340076	0.468424	0.163125	0.252648	0.229106	0.639963	-0.972078	1.5256	False	False		Ctdnep1	0.677109	-0.0597793	0.75409	0.239123	-0.063157	0.126994	False	False
ARSF_+_2984866.23-P1P2|ARSF_-_2984913.23-P1P2	ARSF	0.411795	0.385319	0.0270651	0.0242613	0.829605	0.0811284	-0.141072	0.0304258	False	False		Ago4	0.197372	0.704714	0.291549	0.679333	0.539408	0.268083	-0.300283	0.197416	False	False		Ctdp1	0.272525	-0.0282125	0.143239	0.542495	-0.130633	0.595919	False	False
ARSG_+_66255329.23-ENST00000448504.2|ARSG_+_66255344.23-ENST00000448504.2	ARSG	0.490995	0.308923	-0.0517631	0.0372009	0.585278	0.232638	0.0521738	0.0322672	False	False		Agpat1	0.355991	0.448561	-0.21571	0.319926	0.0783542	1.10594	0.829428	2.24954	False	False		Ctdsp1	0.554481	0.036752	0.379648	1.08089	-0.200974	1.82667	False	False
ARSH_-_2924713.23-ENST00000381130.2|ARSH_-_2924710.23-ENST00000381130.2	ARSH	0.373112	0.42816	0.0242872	0.0241918	0.732559	0.135157	-0.202428	0.0727341	False	False		Agpat2	0.575075	0.240275	0.165436	0.131431	0.538446	0.268858	0.358275	0.236223	False	False		Ctdsp2	0.538352	0.0415144	0.416369	0.170096	-0.0566135	0.0809755	False	False
ARSI_-_149682457.23-P1P2|ARSI_+_149682294.23-P1P2	ARSI	0.113444	0.945219	-0.913436	2.0086	0.478408	0.320202	0.22298	0.18981	False	False		Agpat3	0.0758237	1.12019	0.406099	1.50412	0.0451269	1.34556	-0.520095	1.71621	False	False		Ctdspl	0.0348621	0.00752193	0.00488536	0.00469778	-0.00450203	0.000177844	False	False
ARSJ_+_114900515.23-P1P2|ARSJ_+_114900753.23-P1P2	ARSJ	0.815071	0.0888046	-0.245072	0.0506304	0.993586	0.00279436	-0.0344653	0.000256032	False	False		Agpat4	0.969537	0.0134358	-0.167894	0.00745857	0.888261	0.0514594	-0.116357	0.0146838	False	False		Ctgf	0.861281	0.0460724	0.739264	0.108272	0.0241447	0.0219826	False	False
ARSK_+_94890970.23-P1P2|ARSK_+_94891103.23-P1P2	ARSK	0.646616	0.189353	-0.29929	0.131841	0.384408	0.415207	0.251959	0.278114	False	False		Agpat5	0.925942	0.0334162	-0.021724	0.00240024	0.209978	0.677825	0.765326	1.27218	False	False		Cth	0.293163	-0.0506698	0.276741	0.635903	0.116119	0.620917	False	False
ART1_-_3666414.23-P1P2|ART1_+_3666404.23-P1P2	ART1	0.207261	0.683483	0.395064	0.628173	0.0390485	1.4084	-0.639042	2.39267	False	False		Agpat6	0.0320029	1.49481	-0.474015	2.3428	0.707177	0.150472	-0.221087	0.0815838	False	False		Cthrc1	0.0891525	-0.041767	0.0693714	0.165886	0.0207224	0.028906	False	False
ART3_-_76995916.23-P1|ART3_+_76995900.23-P1	ART3	0.0359185	1.44468	0.500772	1.68305	0.141099	0.850477	-0.65109	1.47208	False	False		Agpat9	0.559456	0.252234	-0.230237	0.192016	0.0395834	1.40249	0.685871	2.35899	False	False		Ctla4	0.0747624	0.00790863	0.0110154	0.0710469	-0.0142311	0.00850201	False	False
ART3_+_76932405.23-P2|ART3_-_76932374.23-P2	ART3	0.260329	0.584478	0.128123	0.174212	0.171757	0.765086	-0.546717	1.11199	False	False		Agps	0.011815	1.92757	-0.618045	3.93901	0.687853	0.162505	0.114934	0.0458034	False	False		Ctnna1	0.0176302	-0.0767779	0.0252178	0.127126	0.0408392	0.0436564	False	False
ART4_-_14996357.23-P1P2|ART4_+_14996362.23-P1P2	ART4	0.116863	0.932322	0.476299	1.03307	0.202995	0.692514	0.238449	0.438989	False	False		Agr2	0.804792	0.0943165	-0.0858474	0.0267715	0.207343	0.68331	-0.445926	0.747248	False	False		Ctnna2	0.861281	-0.0783309	1.25687	0.596946	0.102171	0.512864	False	False
ART5_+_3663184.23-P1P2|ART5_-_3663166.23-P1P2	ART5	0.0189557	1.72226	0.223685	0.896228	0.624659	0.204357	-0.212829	0.115624	False	False		Agr3	0.631907	0.199347	-0.12479	0.082252	0.941914	0.0259887	-0.0153181	0.000976276	False	False		Ctnna3	0.219859	-0.0127146	0.0520786	0.560301	0.0661255	0.311551	False	False
ARTN_-_44399487.23-P1|ARTN_+_44399657.23-P1	ARTN	0.159577	0.79703	0.321	0.5952	0.222155	0.653344	0.481875	0.836961	False	False		Agrn	0.16367	0.786031	-0.431348	1.12105	0.124874	0.903529	-0.456969	1.01254	False	False		Ctnnb1	0.763333	0.0865759	1.23119	0.0121059	-0.00860132	0.000875591	False	False
ARTN_+_44401656.23-P2|ARTN_+_44401650.23-P2	ARTN	0.0451705	1.34514	0.139324	0.435993	0.109614	0.960132	-0.698347	1.7825	False	False		Agrp	0.844617	0.0733401	0.0924905	0.0224283	0.303634	0.517649	-0.390015	0.495108	False	False		Ctnnd1	1.15904	0.0664892	1.4357	0.0930937	-0.00892295	0.00698501	False	False
ARV1_-_231114864.23-P1P2|ARV1_+_231114927.23-P1P2	ARV1	0.998446	0.000675623	-0.184787	0.000290442	0.59266	0.227195	0.154211	0.0931412	False	False		Agt	0.352995	0.452232	0.23851	0.356637	0.399619	0.398354	-0.242567	0.236966	False	False		Ctnnd2	0.0113285	0.0042923	0.000905891	0.00469778	0.0141852	0.00056036	False	False
ARVCF_-_19974634.23-P1|ARVCF_-_19974404.23-P1	ARVCF	0.0419461	1.37731	-1.27443	4.08349	0.44965	0.347125	0.453611	0.418599	False	False		Agtpbp1	0.97988	0.00882714	-0.198718	0.00579983	0.0572666	1.2421	-0.529854	1.61397	False	False		Ctns	0.12272	-0.00994641	0.0227403	0.285189	0.018499	0.0443627	False	False
ARVCF_-_20004313.23-P2|ARVCF_+_20004326.23-P2	ARVCF	0.756039	0.121456	-0.227343	0.0642367	0.383926	0.415753	0.236472	0.261363	False	False		Agtr1a	0.0572305	1.24237	-0.631574	2.59438	0.0603465	1.21935	0.824877	2.46661	False	False		Ctsb	0.0538604	0.0167112	0.0167683	0.0196371	0.0322408	0.0053238	False	False
ARX_-_25031175.23-P2|ARX_+_25031186.23-P2	ARX	0.252868	0.597106	0.12632	0.175471	0.802849	0.095366	-0.139864	0.0354591	False	False		Agtr1b	0.43433	0.36218	0.109433	0.131047	0.975027	0.0109834	-0.0211928	0.000570833	False	False		Ctsd	0.990574	-0.0781887	1.44293	0.816811	0.128771	0.884456	False	False
ARX_+_25034044.23-P1|ARX_-_25033780.23-P1	ARX	0.251416	0.599606	0.0361662	0.0504491	0.438162	0.358366	0.445565	0.424488	False	False		Agtr2	0.239616	0.620484	0.280261	0.574977	0.367679	0.434531	0.250403	0.266836	False	False		Ctsf	0.255432	-0.0437461	0.208174	0.438072	0.134009	0.493648	False	False
AS3MT_+_104629429.23-P1P2|AS3MT_+_104629247.23-P1P2	AS3MT	0.326872	0.485622	-0.344867	0.389613	0.222239	0.65318	0.187126	0.324933	False	False		Agtrap	0.188086	0.725644	0.335815	0.805715	0.295831	0.528956	-1.49731	1.94229	False	False		Ctsg	0.0915866	0.00829888	0.0141601	0.219588	0.0796551	0.147082	False	False
ASAH1_-_17941607.23-P1P2|ASAH1_-_17941563.23-P1P2	ASAH1	0.108532	0.964442	0.275452	0.618024	0.649533	0.187399	-0.10873	0.0541681	False	False		Agxt	0.854216	0.0684323	-2.07031	0.468439	0.753638	0.122837	0.104877	0.0315932	False	False		Ctsh	0.143769	-0.00894548	0.0239598	0.0720673	0.000164881	9.99189e-05	False	False
ASAH2_-_52008322.23-ENST00000395526.4|ASAH2_-_52008325.23-ENST00000395526.4	ASAH2	0.0773421	1.11158	0.444263	1.14886	0.447872	0.348846	-0.283852	0.263242	False	False		Agxt2	0.16215	0.790084	-0.361795	0.945133	0.454665	0.342309	-0.290303	0.243699	False	False		Ctsk	0.339243	0.0471686	0.298111	0.113418	-0.0449986	0.0429161	False	False
ASAH2B_-_52499912.23-P1P2|ASAH2B_-_52499925.23-P1P2	ASAH2B	0.960836	0.0173509	-0.191896	0.00774588	0.215747	0.666055	0.163675	0.289816	False	False		Ahctf1	0.422982	0.373678	-0.288509	0.356463	0.343941	0.463516	0.250119	0.284312	False	False		Ctsl	0.0459508	-0.00762258	0.00652543	1.16306	-0.145858	1.4265	False	False
ASAP1_-_131455906.23-P1P2|ASAP1_-_131455861.23-P1P2	ASAP1	0.00373634	2.42755	-3.02138	17.0631	0.444734	0.3519	0.439251	0.410923	True	False		Ahcy	0.956328	0.0193932	-0.683922	0.0438544	0.0132613	1.87741	1.33895	6.16464	False	False		Ctss	0.0113285	0.0145766	0.0030764	0.62063	-0.124932	0.651995	False	False
ASAP2_+_9346962.23-P1P2|ASAP2_-_9346995.23-P1P2	ASAP2	0.559529	0.252177	-0.537486	0.315323	0.777948	0.109049	0.122605	0.0355433	False	False		Ahcyl1	0.168741	0.77278	0.121204	0.309692	0.31894	0.496291	-0.0868745	0.105733	False	False		Cubn	0.608246	-0.0638018	0.722979	0.301713	0.0520466	0.132046	False	False
ASAP3_-_23810622.23-P1P2|ASAP3_+_23810517.23-P1P2	ASAP3	0.0146564	1.83397	-0.477354	2.03665	0.329438	0.482227	0.283426	0.363344	False	False		Ahcyl2	0.459293	0.33791	0.203589	0.227464	0.955297	0.0198616	-0.354166	0.0172507	False	False		Cul1	2.05609	-0.139279	5.33507	0.247125	0.11294	0.234695	False	False
ASB1_-_239335714.23-P1P2|ASB1_-_239335717.23-P1P2	ASB1	0.204627	0.689037	0.0662971	0.106272	0.00729775	2.13681	-0.663309	3.76799	False	False		Ahdc1	0.846309	0.0724708	0.0276508	0.00662565	0.354056	0.450928	0.64008	0.707823	False	False		Cul2	0.309364	-0.0512152	0.295177	0.216586	-0.0866882	0.15788	False	False
ASB10_-_150884783.23-P1P2|ASB10_-_150884821.23-P1P2	ASB10	0.451558	0.345286	0.179765	0.1444	0.814839	0.0889281	-0.262823	0.0621341	False	False		Ahi1	0.0119853	1.92135	-0.624303	3.96607	0.118389	0.926688	0.633095	1.43875	False	False		Cul3	0.803302	-0.0790401	1.18288	0.861386	0.252049	1.82566	False	False
ASB11_-_15332626.23-P2|ASB11_-_15332629.23-P2	ASB11	0.0376354	1.4244	0.325949	1.08011	0.477891	0.320671	-0.167165	0.142506	False	False		Ahnak	0.0753494	1.12292	0.366643	1.36129	0.49515	0.305263	-0.162486	0.121639	False	False		Cul4a	0.65505	-0.0500183	0.610403	1.0151	-0.148156	1.26464	False	False
ASB11_+_15333577.23-P1|ASB11_+_15333701.23-P1	ASB11	0.662027	0.179125	-0.0506404	0.0211026	0.998566	0.000623035	-0.0372557	6.17069e-05	False	False		Ahnak2	0.859873	0.0655658	-0.149734	0.0324606	0.369771	0.432067	-0.297098	0.3148	False	False		Cul4b	0.179157	-0.0680385	0.227092	0.293471	0.075913	0.187335	False	False
ASB12_+_63445448.23-ENST00000396130.2|ASB12_-_63445141.23-ENST00000396130.2	ASB12	0.113071	0.94665	0.325391	0.716604	0.65951	0.180778	-0.213842	0.10277	False	False		Ahr	0.304858	0.515902	0.274344	0.467972	0.882512	0.0542792	0.264621	0.0352242	False	False		Cul5	0.706199	0.063211	0.831637	0.90447	-0.144729	1.10075	False	False
ASB12_+_63450511.23-ENST00000362002.2|ASB12_-_63450451.23-ENST00000362002.2	ASB12	0.0926135	1.03333	-3.24043	7.78975	0.541277	0.26658	-2.29408	1.62579	False	False		Ahrr	0.924797	0.0339535	0.0720112	0.0080843	0.554914	0.255774	-0.155409	0.0974799	False	False		Cul7	0.382288	-0.0679836	0.484182	0.421205	0.0588078	0.208289	False	False
ASB13_+_5708362.23-P1P2|ASB13_+_5708331.23-P1P2	ASB13	0.0211304	1.67509	0.234847	0.91518	0.261726	0.582153	0.112914	0.174748	False	False		Ahsa1	0.0695116	1.15794	-0.518861	1.98653	0.852155	0.0694813	-0.0972449	0.0165699	False	False		Cuta	0.00203821	-0.00363748	0.000138122	0.0795184	-0.0381971	0.0255409	False	False
ASB14_+_57326672.23-P1P2|ASB14_-_57326679.23-P1P2	ASB14	0.139584	0.855163	0.322041	0.640685	0.910702	0.0406236	0.0106894	0.00115441	False	False		Ahsa2	0.142558	0.846008	0.195808	0.547724	0.338035	0.471038	-0.354371	0.409353	False	False		Cux1	0.13717	-0.0241405	0.0616904	0.00680188	-0.0262005	0.00149857	False	False
ASB15_+_123241932.23-P1P2|ASB15_-_123241904.23-P1P2	ASB15	0.112675	0.948171	-0.10206	0.225127	0.546822	0.262154	-0.469251	0.327031	False	False		Ahsg	0.245717	0.609565	-0.338615	0.68247	0.515622	0.287668	-0.0740973	0.0522731	False	False		Cuzd1	0.423493	0.0367427	0.289889	0.797343	-0.151379	1.01496	False	False
ASB16_-_42248115.23-P1P2|ASB16_-_42248108.23-P1P2	ASB16	0.0138636	1.85812	-0.70951	3.06702	0.469793	0.328094	0.235418	0.205336	False	False		Aicda	0.23732	0.624665	0.185579	0.383296	0.9466	0.0238333	0.137036	0.00800942	False	False		Cxcl1	0.883494	-0.0801363	1.31901	0.0918462	0.0337449	0.026062	False	False
ASB17_+_76398029.23-P1P2|ASB17_+_76398083.23-P1P2	ASB17	0.254481	0.594345	0.517199	0.715121	0.902661	0.0444755	0.0514539	0.00608369	False	False		Aida	0.668644	0.174805	-0.044516	0.0257293	0.667543	0.175521	-0.00927308	0.00399151	False	False		Cxcl10	0.206168	-0.0161109	0.0618807	0.288562	0.103183	0.250373	False	False
ASB18_-_237172801.23-P1P2|ASB18_-_237172983.23-P1P2	ASB18	0.294059	0.531566	0.205314	0.253898	0.39987	0.398081	-0.332375	0.351746	False	False		Aif1	0.346681	0.460069	-0.450951	0.685977	0.307069	0.512764	-0.126298	0.158818	False	False		Cxcl14	0.270957	0.0161997	0.0817749	0.237842	-0.122392	0.244782	False	False
ASB2_+_94442860.23-P1P2|ASB2_-_94442824.23-P1P2	ASB2	0.975235	0.0108907	-0.188578	0.00477783	0.455441	0.341568	0.207458	0.18838	False	False		Aif1l	0.191673	0.71744	-0.743875	1.76459	0.0868473	1.06124	1.14599	2.98251	False	False		Cxcl9	1.43847	0.143018	3.83271	0.0783003	-0.0555296	0.0365617	False	False
ASB4_+_95115299.23-P1P2|ASB4_+_95115678.23-P1P2	ASB4	0.715747	0.14524	-0.269055	0.09091	0.879001	0.0560108	0.0245339	0.00365314	False	False		Aifm1	0.0742911	1.12906	-0.537139	2.00522	0.359756	0.443992	0.296983	0.323364	False	False		Cxcr1	0.324188	0.0337202	0.203658	0.843924	-0.239064	1.69651	False	False
ASB5_+_177190311.23-P1P2|ASB5_-_177190327.23-P1P2	ASB5	0.0129038	1.88928	0.799655	3.51466	0.0117871	1.92859	-0.767226	3.93361	False	False		Aifm2	0.912215	0.0399028	0.0617779	0.00815068	0.961678	0.0169704	0.18989	0.00790277	False	False		Cxcr4	0.0176302	-0.0113502	0.003728	0.607663	0.0334643	0.170995	False	False
ASB6_+_132404367.23-P1P2|ASB6_-_132404013.23-P1P2	ASB6	0.00128336	2.89165	-1.85528	12.4807	0.515267	0.287968	-0.31297	0.239594	True	False		Aifm3	0.340806	0.467493	0.279996	0.432798	0.0020039	2.69812	-1.00097	6.62316	False	False		Cxx1a	0.447471	-0.0591792	0.493342	0.712687	0.0977254	0.585659	False	False
ASB7_-_101142768.23-P1P2|ASB7_-_101142815.23-P1P2	ASB7	0.225865	0.646152	0.445665	0.669926	0.584345	0.233331	-0.119414	0.0740721	False	False		Aig1	0.769869	0.113583	-0.117364	0.0440765	0.527923	0.27743	0.217122	0.147721	False	False		Cxx1b	0.447471	-0.0591792	0.493342	0.712687	0.0977254	0.585659	False	False
ASB8_+_48551218.23-P1P2|ASB8_-_48551252.23-P1P2	ASB8	0.88899	0.0511032	-0.142644	0.0169584	0.0196878	1.7058	0.867169	3.93243	False	False		Aim1	0.752304	0.123607	-0.471426	0.19267	0.707718	0.15014	-0.170833	0.0629001	False	False		Cyb5	0.258514	-0.0349859	0.168497	0.106993	0.0422797	0.0380386	False	False
ASB9_+_15288172.23-P1P2|ASB9_+_15287888.23-P1P2	ASB9	0.101118	0.995173	-0.320335	0.741628	0.00652227	2.1856	0.500172	2.90615	False	False		Aim1l	0.535944	0.27088	-0.444297	0.397931	0.57212	0.242513	-0.1857	0.110441	False	False		Cyb5b	0.262155	-0.0191862	0.0937046	0.687113	0.087122	0.503379	False	False
ASCC1_-_73975994.23-P1P2|ASCC1_-_73975670.23-P1P2	ASCC1	0.971522	0.0125472	-0.175296	0.00511685	0.554888	0.255795	-0.277093	0.188428	False	False		Aim2	0.00572147	2.24249	-1.16472	8.63593	0.0851659	1.06973	0.469873	1.23265	True	False		Cyb5r1	1.01426	-0.0701361	1.32527	1.55029	0.243707	3.177	False	False
ASCC2_+_30234214.23-P1P2|ASCC2_+_30234208.23-P1P2	ASCC2	0.307646	0.511948	0.191717	0.228334	0.592837	0.227064	0.0865065	0.0522187	False	False		Aimp1	0.687102	0.162979	0.00673539	0.00362954	0.132754	0.876953	0.855825	1.84054	False	False		Cyb5r3	0.0735798	0.0226268	0.0310167	0.262829	-0.120517	0.266356	False	False
ASCC3_-_101329197.23-P1P2|ASCC3_-_101329193.23-P1P2	ASCC3	0.0459372	1.33784	-2.8978	9.01894	0.577791	0.238229	-0.34811	0.220465	False	False		Aimp2	0.0556462	1.25456	0.680689	2.82357	0.176406	0.753488	-0.385632	0.712578	False	False		Cyc1	1.56628	-0.158065	4.61231	1.76961	0.242595	3.60992	False	False
ASCL1_-_103351499.23-P1P2|ASCL1_+_103351491.23-P1P2	ASCL1	0.969906	0.0132702	-0.195737	0.00604276	0.51747	0.286115	0.080587	0.0612962	False	False		Aip	0.00442451	2.35414	-1.1621	9.0455	0.0516347	1.28706	0.709447	2.23925	True	False		Cygb	0.793816	-0.056279	0.8323	0.28368	0.0193241	0.0460963	False	False
ASCL2_-_2292271.23-P1P2|ASCL2_-_2292240.23-P1P2	ASCL2	0.365568	0.437032	-0.0407439	0.0414246	0.996415	0.00155961	-0.0368404	0.000152745	False	False		Aipl1	0.10191	0.991781	-0.462463	1.51653	0.189811	0.721678	-0.621313	1.09961	False	False		Cyld	0.719733	0.0854599	1.1459	0.247125	0.137012	0.284717	False	False
ASCL3_-_8964516.23-P1P2|ASCL3_+_8964499.23-P1P2	ASCL3	0.56221	0.250101	0.210477	0.122463	0.303346	0.518062	-1.13743	1.56651	False	False		Aire	0.228292	0.641509	-0.299546	0.635366	0.0757981	1.12034	0.61908	1.70091	False	False		Cyp11a1	0.378778	0.0646142	0.45596	0.065075	-0.00139504	0.000763379	False	False
ASCL4_-_108168588.23-ENST00000342331.4|ASCL4_+_108168289.23-ENST00000342331.4	ASCL4	0.93996	0.0268906	-0.180606	0.0112984	0.945692	0.0242502	-0.00730149	0.000470712	False	False		Ajap1	0.169858	0.769913	-0.643696	1.63863	0.237673	0.624021	-0.617644	0.945194	False	False		Cyp11b2	0.100187	-0.0370461	0.0691459	0.582075	0.100733	0.49305	False	False
ASCL5_+_201096314.23-P1P2|ASCL5_+_201096304.23-P1P2	ASCL5	0.193298	0.713773	0.113408	0.188316	0.667022	0.17586	-0.286831	0.134098	False	False		Ajuba	0.00292822	2.5334	0.532812	4.46308	0.424088	0.372544	-0.280265	0.256053	False	False		Cyp17a1	0.0179961	-0.00239865	0.000804192	0.624978	-0.0585307	0.3076	False	False
ASF1A_-_119215324.23-P1P2|ASF1A_-_119215607.23-P1P2	ASF1A	0.000835112	3.07826	-0.619498	4.43637	0.782005	0.10679	-0.152792	0.043377	False	False		Ak1	0.710037	0.148719	-0.422295	0.207654	0.263475	0.579261	0.414905	0.589396	False	False		Cyp19a1	0.538163	-0.029156	0.292318	2.72354	0.33548	7.68315	False	True
ASF1B_+_14247360.23-P1P2|ASF1B_-_14247349.23-P1P2	ASF1B	0.125305	0.902031	-0.446219	0.936382	0.181477	0.741178	0.293014	0.577351	False	False		Ak2	0.554134	0.256385	0.126079	0.106879	0.507661	0.294426	0.230688	0.166566	False	False		Cyp1a1	0.701713	-0.0406022	0.530789	0.67365	-0.104503	0.591972	False	False
ASGR1_-_7082627.23-P1P2|ASGR1_-_7082650.23-P1P2	ASGR1	0.848771	0.0712093	-0.253427	0.041983	0.699049	0.155492	0.0380367	0.0157231	False	False		Ak3	0.486393	0.313012	-0.159092	0.164652	0.765891	0.115833	0.00850743	0.00241666	False	False		Cyp1a2	0.471948	-0.0281844	0.247809	0.0627046	-0.0129508	0.00682865	False	False
ASGR2_-_7017962.23-P1P2|ASGR2_-_7017981.23-P1P2	ASGR2	0.977155	0.0100364	-0.177104	0.00413513	0.686506	0.163355	0.0884716	0.0384207	False	False		Ak4	0.530263	0.275508	-0.323685	0.29486	0.39394	0.40457	0.653036	0.64791	False	False		Cyp1b1	0.222256	-0.0750316	0.310678	0.17575	0.0464174	0.0685983	False	False
ASH1L_+_155532507.23-P1P2|ASH1L_+_155532498.23-P1P2	ASH1L	0.0527754	1.27757	0.215212	0.639639	0.73833	0.13175	-0.144415	0.0505811	False	False		Ak5	0.18347	0.736434	-1.57374	3.832	0.373334	0.427903	-0.378597	0.397289	False	False		Cyp21a1	0.380531	0.0262942	0.186408	0.00680188	0.0453724	0.00259513	False	False
ASH2L_-_37963062.23-P1P2|ASH2L_-_37963450.23-P1P2	ASH2L	0.00667184	2.17575	-5.45008	27.5865	0.0684422	1.16468	-3.68508	11.4099	True	True		Ak7	0.753945	0.12266	0.0552484	0.0224069	0.606254	0.217345	-0.236726	0.126177	False	False		Cyp24a1	0.0040006	-0.00385026	0.000286965	0.92206	0.104858	0.813015	False	False
ASIC1_+_50451654.23-P1P2|ASIC1_-_50451232.23-P1P2	ASIC1	0.00286019	2.54361	-4.27982	25.3256	0.051158	1.29109	1.52543	5.23573	True	False		Ak8	0.769869	0.113583	-0.0568643	0.0213555	0.178511	0.748335	0.547274	1.00435	False	False		Cyp27b1	0.73338	-0.0958362	1.3094	0.108272	-0.0559884	0.0509747	False	False
ASIC2_-_32484240.23-ENST00000359872.6|ASIC2_-_32484256.23-ENST00000359872.6	ASIC2	0.313491	0.503774	0.00493448	0.0057831	0.744399	0.128194	-0.162698	0.0554471	False	False		Ak9	0.366602	0.435805	0.208852	0.300946	0.229388	0.639429	0.446203	0.699694	False	False		Cyp2a4	0.364891	-1.03934e-06	7.06537e-06	0.591232	-0.117089	0.582119	False	False
ASIC3_+_150748330.23-P1P2|ASIC3_-_150748335.23-P1P2	ASIC3	0.0169647	1.77046	-0.847355	3.49007	0.589446	0.229556	0.374581	0.228593	False	False		Akap1	0.686572	0.163314	0.0546817	0.0295272	0.328578	0.483362	0.310345	0.367876	False	False		Cyp2a5	0.138725	-0.0298569	0.0771638	1.47684	0.175037	2.17371	False	False
ASIC4_-_220379183.23-P1P2|ASIC4_+_220379356.23-P1P2	ASIC4	0.192778	0.714944	0.216695	0.360416	0.689584	0.161413	0.0772142	0.0331333	False	False		Akap10	0.822124	0.0850624	-0.0466882	0.0131312	0.389512	0.409479	0.546609	0.548898	False	False		Cyp2b10	1.43847	-0.080785	2.16494	0.381017	0.0610033	0.19545	False	False
ASIC5_-_156787409.23-P1P2|ASIC5_+_156787402.23-P1P2	ASIC5	0.273663	0.562783	0.19064	0.249596	0.186419	0.729511	-0.714296	1.38528	False	False		Akap11	0.635924	0.196595	-0.120782	0.0785113	0.202918	0.692679	0.198296	0.336844	False	False		Cyp2c29	0.363126	0.0282809	0.191322	0.0464043	-0.0239795	0.00935699	False	False
ASIP_-_32781974.23-P1P2|ASIP_-_32782578.23-P1P2	ASIP	0.0273181	1.56355	0.098353	0.357753	0.64991	0.187147	-0.267046	0.132861	False	False		Akap12	0.712184	0.147408	0.064716	0.031542	0.973866	0.0115009	-0.147815	0.00416901	False	False		Cyp2c37	0.0550003	0.00863768	0.00885066	0.254941	-0.0410393	0.0879788	False	False
ASL_-_65540899.23-P1P2|ASL_+_65541008.23-P1P2	ASL	0.981333	0.00818345	-0.18091	0.00344414	0.810125	0.0914478	-0.103392	0.0251355	False	False		Akap13	0.0377681	1.42287	-0.547207	2.5744	0.171565	0.765572	0.381404	0.716069	False	False		Cyp2c38	0.329181	-0.0163609	0.100336	0.273995	0.0553638	0.127558	False	False
ASMT_-_1734188.23-P1P2|ASMT_+_1734013.23-P1P2	ASMT	0.0754801	1.12217	0.269196	0.702765	0.750157	0.124848	-0.0513503	0.0170432	False	False		Akap14	0.900796	0.0453737	-0.0365262	0.00547981	0.782614	0.106452	-0.297871	0.077762	False	False		Cyp2c39	0.024019	-0.00759251	0.00339746	1.02046	0.212769	1.82576	False	False
ASMTL_-_1571721.23-P1P2|ASMTL_+_1571556.23-P1P2	ASMTL	0.0963434	1.01618	0.475208	1.12341	0.576307	0.239346	-0.187394	0.119237	False	False		Akap17b	0.422149	0.374535	0.269893	0.334227	0.595616	0.225034	-0.373858	0.206319	False	False		Cyp2c50	0.0607373	0.00383296	0.00433714	0.152033	-0.086344	0.110384	False	False
ASNA1_+_12848373.23-P1P2|ASNA1_+_12848657.23-P1P2	ASNA1	0.0434499	1.36201	-3.17654	10.0651	0.449698	0.347079	0.320457	0.295682	True	False		Akap2	0.351875	0.453611	0.12157	0.182334	0.308105	0.511302	-0.694827	0.87124	False	False		Cyp2c54	0.928694	0.0963265	1.6666	0.352712	-0.0722079	0.214163	False	False
ASNS_+_97501749.23-P1P2|ASNS_-_97501690.23-P1P2	ASNS	0.0282193	1.54945	-4.04481	14.5801	0.69976	0.155051	0.0888599	0.0366276	True	False		Akap3	0.208359	0.681188	0.497743	1.12106	0.250342	0.601467	-0.446457	0.658529	False	False		Cyp2c55	0.694484	-0.0400666	0.518393	0.0394284	-0.0617522	0.0204739	False	False
ASNSD1_-_190526200.23-P1P2|ASNSD1_-_190526273.23-P1P2	ASNSD1	0.0150038	1.8238	-4.40964	18.7095	0.433747	0.362763	-0.502554	0.484657	True	False		Akap4	0.388806	0.410267	0.15726	0.213325	0.389914	0.409032	-0.437555	0.438908	False	False		Cyp2d10	0.024019	-0.0202308	0.0090528	0.28044	0.0674095	0.158964	False	False
ASPA_+_3379320.23-P1P2|ASPA_+_3379511.23-P1P2	ASPA	0.323248	0.490465	-0.569452	0.649754	0.0281924	1.54987	0.427877	1.76296	False	False		Akap5	0.661315	0.179591	0.0982897	0.0583648	0.806759	0.0932564	-0.133088	0.0304369	False	False		Cyp2d11	0.97493	-0.0673614	1.22348	0.0142451	0.0136571	0.00163592	False	False
ASPDH_+_51017895.23-P1P2|ASPDH_-_51017868.23-P1P2	ASPDH	0.0808129	1.09252	-1.14171	2.9018	0.828043	0.0819473	-0.130177	0.0283593	False	False		Akap6	0.757231	0.120771	-0.859235	0.34311	0.111188	0.953941	0.754936	1.7661	False	False		Cyp2d12	1.07053	0.0864097	1.72336	0.579963	-0.0995809	0.48564	False	False
ASPG_+_104552082.23-P1|ASPG_+_104552087.23-P1	ASPG	0.199848	0.699301	0.0991269	0.161265	0.236484	0.626199	-0.317263	0.528153	False	False		Akap7	0.228849	0.64045	0.273434	0.579023	0.466165	0.33146	0.226655	0.184239	False	False		Cyp2d34	0.253894	-0.0180373	0.0853174	0.153405	0.0416424	0.0537173	False	False
ASPG_+_104571288.23-P2|ASPG_+_104571259.23-P2	ASPG	0.420905	0.375816	0.112803	0.0986236	0.0536791	1.27019	0.723699	2.44375	False	False		Akap8	0.0142614	1.84584	-0.453978	2.77068	0.0554439	1.25615	0.537194	1.65484	False	False		Cyp2d9	0.0783256	0.0432303	0.0630821	0.851388	-0.196964	1.41011	False	False
ASPH_-_62626723.23-P1P2|ASPH_-_62626742.23-P1P2	ASPH	0.018218	1.7395	-2.22201	8.99197	0.0502617	1.29876	0.344256	1.18861	False	False		Akap8l	0.766567	0.11545	0.108797	0.0415306	0.0490076	1.30974	-0.67624	2.17204	False	False		Cyp2j6	0.294771	0.0138774	0.0762089	0.508046	0.100003	0.427221	False	False
ASPHD1_-_29911917.23-P1P2|ASPHD1_-_29911974.23-P1P2	ASPHD1	0.0279496	1.55362	0.35326	1.27681	0.95326	0.0207885	-0.0583206	0.00322309	False	False		Akap9	0.5331	0.273191	-0.170883	0.154356	0.522227	0.282141	-0.32862	0.227376	False	False		Cyp3a11	0.0891525	-0.0134193	0.0222883	0.415638	-0.102232	0.357305	False	False
ASPHD2_-_26825273.23-P1P2|ASPHD2_-_26825290.23-P1P2	ASPHD2	0.613986	0.211842	-0.0878199	0.04328	0.870868	0.0600476	-0.0563159	0.00898991	False	False		Akip1	0.99655	0.00150069	-1.30296	0.00646518	0.191186	0.718544	-0.367422	0.647444	False	False		Cyp3a16	0.339243	-0.0411326	0.259963	0.0579953	-0.0266529	0.012998	False	False
ASPM_+_197115513.23-P1P2|ASPM_-_197115391.23-P1P2	ASPM	0.859812	0.0655964	-0.205873	0.0314169	0.981119	0.0082783	-0.0315028	0.000693296	False	False		Akirin1	0.545481	0.263221	-0.215597	0.187638	0.911889	0.0400583	0.0510029	0.00501038	False	False		Cyp3a41a	0.272525	0.0288748	0.146602	0.236305	0.0285475	0.0567257	False	False
ASPN_+_95244763.23-P1P2|ASPN_+_95244720.23-P1P2	ASPN	0.093466	1.02935	0.0194063	0.0464716	0.930741	0.0311712	-0.075525	0.00625854	False	False		Akirin2	0.169858	0.769913	-0.112614	0.286677	0.860155	0.0654234	-0.0527112	0.00845708	False	False		Cyp3a41b	0.130637	0.0140857	0.0342814	0.569453	0.139436	0.667683	False	False
ASPRV1_+_70188959.23-ENST00000320256.4|ASPRV1_-_70189027.23-ENST00000320256.4	ASPRV1	0.593363	0.226679	-0.0791673	0.0417486	0.349773	0.456214	0.121687	0.147584	False	False		Akna	0.496375	0.30419	-0.194666	0.195791	0.699074	0.155477	0.262213	0.0999779	False	False		Cyp3a44	0.75869	0.0377525	0.53361	0.182879	0.083458	0.128342	False	False
ASPSCR1_-_79935528.23-P1P2|ASPSCR1_-_79935518.23-P1P2	ASPSCR1	0.0206102	1.68592	-0.0152638	0.0598665	0.414873	0.382085	-0.190848	0.193855	False	False		Aknad1	0.464997	0.33255	-0.193588	0.21286	0.0170479	1.76833	0.96217	4.17252	False	False		Cyp4a10	0.422536	0.0227926	0.17942	0.510047	0.140381	0.602082	False	False
ASRGL1_+_62105004.23-P1P2|ASRGL1_-_62104973.23-P1P2	ASRGL1	0.359287	0.444559	-0.311675	0.322341	0.911792	0.0401044	-0.0248678	0.00265129	False	False		Akp3	0.583951	0.233623	-0.829987	0.641129	0.730586	0.136329	-0.0943847	0.0315553	False	False		Cyp4a31	0.304474	-0.044482	0.252318	0.56527	-0.128042	0.608622	False	False
ASS1_-_133320387.23-P1P2|ASS1_+_133320409.23-P1P2	ASS1	0.0917056	1.0376	0.285396	0.68891	0.316409	0.499751	-0.205134	0.272533	False	False		Akr1a1	0.239041	0.621528	-0.131723	0.270695	0.383524	0.416208	0.205103	0.209347	False	False		Cyp4a32	0.00614327	-0.0205274	0.00234935	0.131772	0.0302281	0.0334944	False	False
ASTE1_+_130745613.23-P1P2|ASTE1_-_130745586.23-P1P2	ASTE1	0.952106	0.0213148	-0.19369	0.00960444	0.957107	0.0190394	-0.0670823	0.00339539	False	False		Akr1b10	0.210714	0.676307	0.266079	0.594993	0.754802	0.122167	-0.00360402	0.00107976	False	False		Cyp51	0.763333	-0.0536288	0.76265	0.428671	-0.103685	0.373748	False	False
ASTL_+_96804167.23-ENST00000342380.2|ASTL_+_96804158.23-ENST00000342380.2	ASTL	0.777484	0.109309	-0.146478	0.0372487	0.38864	0.410453	-0.339495	0.370446	False	False		Akr1b3	0.559941	0.251858	-0.153086	0.127482	0.087385	1.05856	-0.648327	1.68304	False	False		Cysltr1	0.0481983	0.0214847	0.0192919	0.160311	-0.043909	0.0591911	False	False
ASTN1_+_177133808.23-P1P2|ASTN1_+_177133827.23-P1P2	ASTN1	0.14179	0.848354	-0.0717236	0.141554	0.399547	0.398432	-0.218335	0.231262	False	False		Akr1b7	0.862704	0.0641383	-0.0452905	0.00960467	0.204213	0.689918	-0.38234	0.646891	False	False		Cysltr2	1.23052	-0.115699	2.65235	0.52387	0.116874	0.514847	False	False
ASTN2_-_120177339.23-P1P2|ASTN2_-_120177334.23-P1P2	ASTN2	0.362588	0.440587	0.0785124	0.0804737	0.665389	0.176925	-0.376297	0.176989	False	False		Akr1b8	0.111775	0.951656	0.356181	1.12075	0.527447	0.277821	-0.157601	0.107377	False	False		Cyth2	0.0504556	-0.0230659	0.0216818	0.161701	0.0873841	0.118818	False	False
ASUN_-_27090898.23-P1P2|ASUN_+_27090863.23-P1P2	ASUN	0.120463	0.919147	-5.64154	12.0633	0.633276	0.198407	-0.653251	0.34456	True	False		Akr1c12	0.982179	0.00780938	-0.190482	0.00491845	0.0886048	1.05254	-0.518337	1.33794	False	False		Cyth3	0.441893	0.0187302	0.154196	0.790096	0.134864	0.896016	False	False
ASXL1_+_30946211.23-P1P2|ASXL1_+_30946335.23-P1P2	ASXL1	0.751219	0.124234	-0.126785	0.036643	0.14723	0.832005	0.280373	0.62014	False	False		Akr1c13	0.309637	0.509147	0.327984	0.552146	0.671785	0.172769	-0.144792	0.0613472	False	False		D1Pas1	0.815231	0.106001	1.60992	0.19589	0.0698044	0.114983	False	False
ASXL2_+_26100928.23-P1P2|ASXL2_+_26101289.23-P1P2	ASXL2	0.163823	0.785624	-0.5562	1.01655	0.0308661	1.51052	0.517259	2.07712	False	False		Akr1c14	0.0584671	1.23309	0.401196	1.63572	0.0195965	1.70782	0.826474	3.46143	False	False		D430042O09Rik	0.139802	0.000779995	0.00203151	1.36701	0.248212	2.85321	False	False
ASXL3_-_31158240.23-P1P2|ASXL3_-_31158223.23-P1P2	ASXL3	0.429168	0.367373	-0.0448662	0.0383451	0.602289	0.220195	-0.243098	0.142304	False	False		Akr1c18	0.892814	0.0492388	-0.129388	0.021065	0.303977	0.51716	0.1846	0.234122	False	False		D7Ertd443e	0.635704	-0.0295136	0.349535	0.470614	-0.0610368	0.241543	False	False
ASZ1_+_117067530.23-P1P2|ASZ1_+_117067548.23-P1P2	ASZ1	0.970855	0.0128457	-0.201374	0.00601791	0.362839	0.440286	0.296771	0.347363	False	False		Akr1c19	0.659749	0.180621	0.115772	0.0691402	0.44506	0.351582	-0.47339	0.408159	False	False		D8Ertd82e	0.77032	0.083335	1.19595	0.288562	-0.109653	0.266073	False	False
ATAD1_-_89577820.23-P1P2|ATAD1_-_89577928.23-P1P2	ATAD1	0.116416	0.933989	-0.770149	1.6734	0.436101	0.360412	0.166343	0.15938	False	False		Akr1c20	0.0719827	1.14277	0.361956	1.36764	0.892289	0.0494947	0.0231784	0.00281337	False	False		Dab1	0.496929	0.0149159	0.138088	0.651333	-0.144164	0.789583	False	False
ATAD2_+_124408604.23-P1P2|ATAD2_-_124408650.23-P1P2	ATAD2	0.141918	0.847964	0.156725	0.309171	0.098579	1.00622	-0.505113	1.35116	False	False		Akr1c21	0.680752	0.167011	-0.447572	0.247153	0.0606458	1.2172	-0.953343	2.84574	False	False		Dab2	0.197532	0.0188163	0.0692446	0.167287	-0.0706625	0.0994005	False	False
ATAD2B_+_24149925.23-P1P2|ATAD2B_+_24149936.23-P1P2	ATAD2B	0.657951	0.181806	-0.344995	0.145917	0.894748	0.0482991	-0.0880994	0.011312	False	False		Akr1c6	0.716485	0.144793	0.0765605	0.0366529	0.909003	0.0414349	0.00170054	0.000172797	False	False		Dab2ip	0.124169	-0.0223545	0.051712	0.534307	0.0974415	0.437798	False	False
ATAD3A_-_1448112.23-P1P2|ATAD3A_+_1448130.23-P1P2	ATAD3A	0.020626	1.68558	-1.07902	4.23119	0.101284	0.994457	-2.23916	5.91971	False	False		Akr1cl	0.97873	0.00933689	-0.128841	0.00397755	0.061248	1.21291	0.533246	1.58613	False	False		Dact1	0.428982	0.0330272	0.263952	1.16595	-0.172799	1.69418	False	False
ATAD3B_+_1407208.23-P1|ATAD3B_+_1407150.23-P1	ATAD3B	0.927584	0.0326468	-0.237398	0.0180302	0.82775	0.0821006	0.058093	0.0126794	False	False		Akr1d1	0.671269	0.173104	0.0977055	0.055922	0.778703	0.108628	-0.0341712	0.00910306	False	False		Dao	0.640203	0.0458354	0.546679	0.153405	-0.0706206	0.0910983	False	False
ATAD3C_-_1397877.23-P1P2|ATAD3C_-_1398044.23-P1P2	ATAD3C	0.0726526	1.13875	0.214418	0.568033	0.865512	0.0627269	-0.111563	0.0186038	False	False		Akr1e1	0.0697334	1.15656	0.689303	2.63594	0.162839	0.788241	-0.11167	0.215863	False	False		Dap	0.443749	0.0373582	0.308843	0.188633	-0.0201947	0.0320327	False	False
ATAD5_-_29159373.23-P1P2|ATAD5_+_29159040.23-P1P2	ATAD5	0.00176969	2.7521	-2.4809	15.8839	0.0318366	1.49707	0.789506	3.14215	True	False		Akr7a5	0.697202	0.156641	-0.0673388	0.0348762	0.975608	0.0107249	0.0912067	0.00239885	False	False		Dap3	0.0964855	0.017403	0.0312824	0.0317226	-0.0101792	0.00271532	False	False
ATAT1_-_30594710.23-P1P2|ATAT1_-_30594683.23-P1P2	ATAT1	0.154892	0.80997	0.435592	0.820792	0.870078	0.060442	-0.0822928	0.013223	False	False		Akt1	0.384458	0.415151	-0.15313	0.210196	0.122036	0.913511	-0.44554	0.998123	False	False		Dapk1	0.131938	0.0339754	0.0835118	0.438072	-0.0885838	0.326316	False	False
ATCAY_-_3880723.23-P1P2|ATCAY_-_3880720.23-P1P2	ATCAY	0.0945161	1.02449	0.384575	0.916588	0.289499	0.538353	-0.209726	0.300157	False	False		Akt1s1	0.236749	0.625712	0.117382	0.242848	0.18494	0.732969	-0.469715	0.844313	False	False		Dapk2	0.803302	-0.0200045	0.299379	0.484274	-0.0402842	0.164045	False	False
ATE1_+_123687896.23-P1P2|ATE1_+_123687521.23-P1P2	ATE1	0.469532	0.328335	-0.346156	0.264407	0.77333	0.111635	0.12387	0.0367616	False	False		Akt2	0.26129	0.582877	-0.177125	0.341361	0.0973242	1.01178	-0.523857	1.29982	False	False		Dapk3	0.699474	0.040135	0.523009	0.300057	0.0853466	0.215342	False	False
ATF1_-_51158152.23-P1P2|ATF1_+_51157878.23-P1P2	ATF1	0.217153	0.663234	-0.00194901	0.00300722	0.251656	0.599192	-0.440713	0.702021	False	False		Akt3	0.767667	0.114827	0.0354411	0.0134558	0.268796	0.570577	-0.305191	0.427041	False	False		Dapp1	0.368317	0.0144452	0.0991197	0.200278	-0.0451776	0.0760841	False	False
ATF2_+_176032892.23-P1P2|ATF2_+_176032497.23-P1P2	ATF2	0.509814	0.292588	-0.100353	0.0683078	0.406911	0.3905	-0.184664	0.191704	False	False		Aktip	0.58742	0.231051	0.0493348	0.0376894	0.747621	0.126319	0.350882	0.108696	False	False		Dars	3.37615	-0.32873	20.6764	0.869267	0.171	1.24994	True	False
ATF3_+_212782184.23-P1P2|ATF3_+_212782317.23-P1P2	ATF3	0.522631	0.281805	-0.0259212	0.0169936	0.654039	0.184396	0.241991	0.118626	False	False		Alad	0.0707383	1.15035	0.56774	2.15941	0.00513483	2.28947	0.925343	5.19544	False	False		Dars2	2.6768	-0.256541	12.7934	1.45518	0.254147	3.10986	True	False
ATF4_-_39916548.23-P1P2|ATF4_-_39917038.23-P1P2	ATF4	0.00979094	2.00918	-4.48379	20.9578	0.425633	0.370965	-1.28121	1.26351	True	False		Alas1	0.190938	0.719107	0.137088	0.325949	0.739912	0.13082	0.225393	0.0723102	False	False		Daxx	1.13102	-0.0280017	0.590025	0.590554	-0.0956163	0.47482	False	False
ATF6_-_161736215.23-P1P2|ATF6_+_161736350.23-P1P2	ATF6	0.36988	0.431939	0.143412	0.14411	0.712557	0.14718	-0.208846	0.0817154	False	False		Alas2	0.829981	0.0809317	0.00160119	0.00042847	0.0687571	1.16268	-0.797656	2.27437	False	False		Dbf4	0.146427	0.0233059	0.0635772	0.300057	-0.0370545	0.0934939	False	False
ATF6B_-_32095947.23-P1P2|ATF6B_+_32095825.23-P1P2	ATF6B	0.0897296	1.04706	0.116257	0.283188	0.0474719	1.32356	-0.143533	0.505038	False	False		Alb	0.475183	0.323139	-0.408801	0.436776	0.502544	0.298826	0.379057	0.277784	False	False		Dbh	0.272525	0.024351	0.123633	0.538395	-0.068575	0.31046	False	False
ATF7_+_54019710.23-P1P2|ATF7_+_54019638.23-P1P2	ATF7	0.730343	0.136473	-0.0836116	0.0265459	0.939467	0.0271183	0.0304136	0.00219259	False	False		Alcam	0.00597919	2.22336	0.875562	6.43656	0.0740144	1.13068	-0.71744	1.98935	False	False		Dbi	0.108913	-0.0070575	0.0143201	0.00260366	-0.0390974	0.000855992	False	False
ATF7IP_-_14518596.23-P1|ATF7IP_-_14518693.23-P1	ATF7IP	0.181498	0.741127	-0.669587	1.15447	0.96246	0.0166173	-0.0150367	0.000664264	False	False		Aldh16a1	0.161933	0.790664	-0.207094	0.5414	0.762311	0.117868	0.499302	0.144325	False	False		Dbp	0.248692	-0.0625332	0.289725	0.169856	-0.0391518	0.0559205	False	False
ATF7IP_-_14538285.23-P2|ATF7IP_-_14538334.23-P2	ATF7IP	0.3441	0.463315	-0.021092	0.0227341	0.978057	0.00963577	-0.0475294	0.00121752	False	False		Aldh18a1	0.75504	0.12203	0.0532324	0.0214783	0.639187	0.194372	0.147984	0.0705395	False	False		Dcaf12l2	0.542366	-0.13187	1.33246	0.87901	0.183341	1.35517	False	False
ATF7IP2_-_10480285.23-P1P2|ATF7IP2_+_10480166.23-P1P2	ATF7IP2	0.0617151	1.20961	-0.816304	2.2971	0.037596	1.42486	0.315379	1.19463	False	False		Aldh1a1	0.967813	0.0142085	-0.107264	0.00503916	0.607781	0.216253	-0.586443	0.311008	False	False		Dcaf4	0.829649	-0.0804775	1.24389	1.7137	-0.31253	4.50367	False	False
ATG10_+_81267917.23-P1P2|ATG10_-_81267907.23-P1P2	ATG10	0.398532	0.399536	-0.509335	0.473417	0.749068	0.125479	0.142485	0.04753	False	False		Aldh1a2	0.164762	0.783142	-1.52571	3.95066	0.65579	0.183235	-0.144641	0.0649957	False	False		Dcc	0.12032	-0.0691371	0.154975	0.253372	-0.259566	0.553024	False	False
ATG12_-_115177215.23-P1P2|ATG12_-_115177477.23-P1P2	ATG12	0.596058	0.224711	0.105932	0.055378	0.859546	0.0657309	-0.0907736	0.015862	False	False		Aldh1a3	0.539749	0.267808	-0.190402	0.168598	0.499302	0.301637	0.200221	0.148107	False	False		Dck	0.235666	-0.0269877	0.118488	0.0930937	-0.0426748	0.0334064	False	False
ATG13_-_46639118.23-P1P2|ATG13_-_46639144.23-P1P2	ATG13	0.442871	0.353723	0.0656829	0.0540505	0.0648662	1.18798	-0.748452	2.36375	False	False		Aldh1a7	0.354491	0.450395	0.428567	0.63822	0.171565	0.765572	-0.539191	1.01231	False	False		Dclk1	0.876061	-0.0449653	0.73388	0.221093	0.0327277	0.0608457	False	False
ATG14_+_55878313.23-P1P2|ATG14_-_55878158.23-P1P2	ATG14	0.014361	1.84281	-1.04566	4.48288	0.261711	0.582177	-0.914088	1.41472	False	False		Aldh1b1	0.165201	0.781988	0.463623	1.19873	0.118905	0.924801	-0.705712	1.60051	False	False		Dclk2	0.740245	-0.0881712	1.21595	0.277212	0.144053	0.335793	False	False
ATG16L1_+_234160346.23-P1P2|ATG16L1_-_234160341.23-P1P2	ATG16L1	0.0574168	1.24096	-0.530094	1.53036	0.149648	0.824929	-0.772642	1.69443	False	False		Aldh1l1	0.961118	0.0172232	-0.049744	0.00283278	0.845406	0.0729346	-0.0617217	0.0110396	False	False		Dclk3	0.231171	-0.02827	0.121751	0.0627046	-0.0206341	0.0108798	False	False
ATG16L2_-_72525477.23-P1P2|ATG16L2_-_72525493.23-P1P2	ATG16L2	0.363409	0.439604	0.0189414	0.0193712	0.524996	0.279844	-0.0788402	0.0586532	False	False		Aldh1l2	0.0745252	1.1277	0.647426	2.41402	0.677636	0.169003	-0.0362329	0.015017	False	False		Dclre1a	0.306101	-0.0424503	0.24208	0.488204	0.0925244	0.379836	False	False
ATG2A_-_64684556.23-P1P2|ATG2A_-_64684666.23-P1P2	ATG2A	0.00872359	2.0593	0.198387	0.950426	0.614067	0.211784	-0.165377	0.0931103	False	False		Aldh2	0.298116	0.525615	-0.901749	1.56715	0.84588	0.072691	0.555487	0.0990235	False	False		Dclre1b	0.106407	-0.0370716	0.0734895	0.449455	-0.133216	0.50348	False	False
ATG2B_-_96829681.23-P1P2|ATG2B_+_96829705.23-P1P2	ATG2B	0.165624	0.780877	-0.270106	0.490682	0.470251	0.32767	-0.41556	0.361993	False	False		Aldh3a1	0.977822	0.00974029	-0.000234909	7.56536e-06	0.927024	0.0329088	0.0678847	0.00547857	False	False		Dclre1c	0.428982	-0.0611695	0.488864	2.97042	-0.382219	9.54703	False	True
ATG3_-_112280669.23-P1P2|ATG3_+_112280783.23-P1P2	ATG3	0.00246009	2.60905	-1.36462	8.28279	0.166658	0.778174	-0.18544	0.383626	False	False		Aldh3a2	0.695071	0.157971	-0.355918	0.185902	0.803378	0.0950801	0.188168	0.0438753	False	False		Dcn	0.317571	0.060546	0.358212	0.0568245	-0.0600956	0.0287155	False	False
ATG4A_+_107335009.23-P1P2|ATG4A_-_107335240.23-P1P2	ATG4A	0.00409389	2.38786	0.107781	0.598737	0.324483	0.488808	0.28637	0.37213	False	False		Aldh3b1	0.781462	0.107092	-0.128217	0.0454003	0.0861789	1.0646	-0.468812	1.22396	False	False		Dcps	0.964566	-0.0562769	1.01129	0.0163943	0.0138402	0.00190798	False	False
ATG4B_+_242577150.23-P1P2|ATG4B_+_242577182.23-P1P2	ATG4B	0.280804	0.551596	0.239974	0.307943	0.274685	0.561165	-0.370013	0.551997	False	False		Aldh3b2	0.545002	0.263602	-0.0952335	0.0830035	0.295159	0.529944	0.325859	0.42349	False	False		Dct	0.144644	-0.0404296	0.108947	0.184166	0.0342362	0.0530193	False	False
ATG4C_-_63249832.23-P1P2|ATG4C_+_63249892.23-P1P2	ATG4C	0.37743	0.423164	0.109657	0.107952	0.999932	2.93323e-05	-0.0378516	2.95161e-06	False	False		Aldh4a1	0.0842662	1.07435	0.48198	1.71211	0.26472	0.577213	-0.328449	0.464929	False	False		Dctd	0.269392	-0.0249261	0.125098	0.0627046	0.01059	0.00558386	False	False
ATG4D_-_10654651.23-P1P2|ATG4D_-_10654604.23-P1P2	ATG4D	0.203272	0.691923	0.0587971	0.0946449	0.154345	0.811507	0.315646	0.680958	False	False		Aldh5a1	0.785337	0.104944	-0.233739	0.0811045	0.765891	0.115833	-0.101779	0.0289118	False	False		Dctn2	1.35218	-0.172101	4.33544	0.303368	-0.0833624	0.212656	False	False
ATG5_+_106773313.23-P1P2|ATG5_+_106773494.23-P1P2	ATG5	0.031832	1.49714	-1.21469	4.2307	0.0180984	1.74236	-0.865717	4.00998	False	False		Aldh6a1	0.274041	0.562184	-2.15376	4.00344	0.583561	0.233913	0.11976	0.0686989	False	False		Dctn3	1.98203	-0.165675	6.11763	2.07945	0.311729	5.45085	False	False
ATG7_-_11314095.23-P1P2|ATG7_-_11314148.23-P1P2	ATG7	0.0514295	1.28879	-1.01537	3.0443	0.4264	0.370183	0.0861072	0.0847391	False	False		Aldh7a1	0.130604	0.884045	-0.270456	0.790549	0.0148546	1.82814	-0.639624	2.8676	False	False		Dctn4	0.0272463	-0.0500966	0.025429	0.506047	-0.107631	0.458001	False	False
ATG9A_-_220093869.23-P1P2|ATG9A_+_220094211.23-P1P2	ATG9A	0.243155	0.614117	-0.561882	0.802749	0.172393	0.763481	-0.449495	0.912329	False	False		Aldh8a1	0.92308	0.0347606	-0.0198873	0.0022857	0.805631	0.0938636	0.186399	0.0429067	False	False		Dcx	0.1626	0.0108267	0.0327966	0.62063	0.0392644	0.204913	False	False
ATG9B_-_150721519.23-P1P2|ATG9B_-_150721533.23-P1P2	ATG9B	0.643719	0.191304	-0.0553843	0.0246487	0.554084	0.256424	0.222019	0.151348	False	False		Aldh9a1	0.851391	0.0698712	-0.135291	0.0312553	0.962258	0.0167085	-0.0222403	0.000911301	False	False		Dcxr	0.401802	0.00124527	0.00932159	0.00680188	0.00360052	0.000205936	False	False
ATHL1_-_289141.23-P1P2|ATHL1_+_289204.23-P1P2	ATHL1	0.502699	0.298692	-0.00950278	0.00660324	0.112087	0.950446	-0.403888	1.02051	False	False		Aldoa	0.0407192	1.3902	-0.636424	2.92538	0.00548059	2.26117	1.27133	7.04981	False	False		Ddah1	0.229678	-0.0737167	0.315427	0.0761218	-0.0123467	0.00790313	False	False
ATIC_+_216176831.23-P1P2|ATIC_+_216177046.23-P1P2	ATIC	0.0257581	1.58909	-3.14266	11.6179	0.831314	0.0802349	0.0603753	0.0128781	True	False		Aldoart1	0.226074	0.645749	0.248981	0.531603	0.884811	0.0531494	-0.0113106	0.00147423	False	False		Ddah2	0.0607373	-0.034243	0.0387472	0.0153185	0.0306682	0.00395041	False	False
ATL1_-_51026934.23-P1P2|ATL1_+_51026923.23-P1P2	ATL1	0.542063	0.26595	-0.0560349	0.0346691	0.246072	0.608938	-0.762577	1.23448	False	False		Aldoart2	0.551724	0.258278	-0.115635	0.0987497	0.652253	0.185584	-0.312707	0.142319	False	False		Ddb1	2.67242	-0.182951	9.10865	0.108203	-0.0317011	0.0288438	True	False
ATL2_+_38604354.23-P1P2|ATL2_+_38604046.23-P1P2	ATL2	0.0134337	1.8718	-4.39214	19.1258	0.305513	0.51497	-1.25516	1.71834	True	False		Aldob	0.956328	0.0193932	-0.017506	0.00112252	0.937331	0.0281069	-0.0614603	0.00423635	False	False		Ddb2	0.0771353	-0.038295	0.0550312	0.402755	0.0523631	0.177339	False	False
ATL3_-_63439002.23-P1P2|ATL3_-_63438854.23-P1P2	ATL3	0.306421	0.513682	-0.0142734	0.0170571	0.680457	0.167199	0.0561907	0.0249762	False	False		Aldoc	0.597883	0.223384	-0.131195	0.0969002	0.282257	0.549356	0.42801	0.576622	False	False		Ddc	0.644516	0.0900008	1.08067	0.58419	0.0582897	0.286341	False	False
ATM_-_108093829.23-P1P2|ATM_-_108093813.23-P1P2	ATM	0.0844588	1.07336	-1.00887	2.5192	0.00394278	2.4042	-3.81721	24.3975	False	True		Alg1	0.000126777	3.89696	-3.31589	42.7251	0.820932	0.0856927	0.354243	0.0744438	True	False		Ddit3	0.0470733	-0.00816975	0.00716468	0.462877	0.07241	0.28184	False	False
ATMIN_+_81069685.23-P1P2|ATMIN_+_81069661.23-P1P2	ATMIN	0.265932	0.575229	-0.423568	0.566822	0.205274	0.687667	0.678848	1.24102	False	False		Alg10b	0.636438	0.196244	0.0785986	0.0509998	0.0613488	1.21219	-0.684634	2.03523	False	False		Ddit4	0.449336	-0.0475573	0.398109	1.75548	0.271063	4.00133	False	False
ATN1_+_7036968.23-P1P2|ATN1_+_7037039.23-P1P2	ATN1	0.382903	0.416912	-0.053591	0.051978	0.333147	0.477364	-0.24585	0.311995	False	False		Alg11	0.000334599	3.47548	-5.76074	66.1988	0.349647	0.456371	-0.382902	0.428538	True	False		Ddo	0.130637	0.0232483	0.0565808	0.0968521	-0.134577	0.109602	False	False
ATOH1_+_94750042.23-P1P2|ATOH1_-_94749954.23-P1P2	ATOH1	0.506545	0.295382	-0.228171	0.156794	0.0913747	1.03917	0.269425	0.74431	False	False		Alg12	0.216015	0.665516	-0.492546	1.08383	0.976769	0.0102083	0.0819848	0.00205243	False	False		Ddr1	0.905965	0.0620158	1.04671	1.90667	-0.20759	3.32828	False	False
ATOH7_-_69991496.23-P1P2|ATOH7_+_69991516.23-P1P2	ATOH7	0.138896	0.85731	0.0547809	0.109257	0.578373	0.237792	-0.0865904	0.0547387	False	False		Alg13	0.626191	0.203294	-0.297643	0.200068	0.575591	0.239886	-0.277494	0.163246	False	False		Ddr2	0.17637	-0.0118765	0.0390236	0.130443	-0.0474839	0.0520842	False	False
ATOH8_-_85981251.23-P1P2|ATOH8_-_85981376.23-P1P2	ATOH8	0.536427	0.270489	-0.0823082	0.0517936	0.58874	0.230077	0.148755	0.0909855	False	False		Alg14	0.900923	0.0453122	-0.0181793	0.00272364	0.133608	0.874169	0.485569	1.04095	False	False		Ddx10	1.87708	-0.0777112	2.71757	0.16869	0.0512145	0.0726476	False	False
ATOX1_-_151137767.23-P1P2|ATOX1_+_151137709.23-P1P2	ATOX1	0.000632253	3.19911	-3.66333	27.2639	0.126149	0.899117	0.598803	1.43129	True	False		Alg2	0.00744746	2.12799	-3.41885	24.0551	0.0725013	1.13965	1.26785	3.54344	True	False		Ddx11	1.36435	-0.114436	2.90871	0.821711	0.18844	1.30206	False	False
ATP10A_+_26108493.23-P1P2|ATP10A_+_26108418.23-P1P2	ATP10A	0.482509	0.316494	-0.431783	0.317918	0.689668	0.16136	-0.175923	0.0754654	False	False		Alg3	0.0128696	1.89044	-0.988481	6.17857	0.177204	0.751526	-0.523825	0.965414	False	False		Ddx18	1.56954	-0.321534	9.40185	0.0968431	0.0097661	0.00795295	True	False
ATP10B_+_160279194.23-P1P2|ATP10B_+_160278964.23-P1P2	ATP10B	0.0967011	1.01457	0.0733279	0.173075	0.995165	0.00210504	-0.0391862	0.000219292	False	False		Alg5	0.0570421	1.2438	-0.518029	2.13041	0.300565	0.522062	-0.224903	0.287939	False	False		Ddx20	0.81045	-0.133805	2.02029	0.278824	0.0424216	0.0994618	False	False
ATP10D_+_47487444.23-P1P2|ATP10D_+_47487367.23-P1P2	ATP10D	0.0924236	1.03422	0.18627	0.448164	0.849213	0.0709834	0.0349428	0.0065939	False	False		Alg6	0.000115402	3.93779	-2.75213	35.8327	0.00127343	2.89503	1.87121	13.2849	True	True		Ddx23	2.73253	-0.25379	12.9197	1.70981	0.296107	4.2573	True	False
ATP11A_-_113344323.23-P1P2|ATP11A_+_113344507.23-P1P2	ATP11A	0.249372	0.603152	0.0466428	0.0654477	0.181772	0.740473	0.34866	0.68634	False	False		Alg8	0.0157533	1.80263	-1.32743	7.91182	0.0782309	1.10662	0.475755	1.29112	False	False		Ddx39b	1.70965	-0.191385	6.0958	0.943284	0.225685	1.79013	False	False
ATP11B_+_182511382.23-P1P2|ATP11B_-_182511533.23-P1P2	ATP11B	0.00171163	2.76659	-3.84816	24.7675	0.337522	0.471697	-0.536368	0.672597	True	False		Alg9	0.243963	0.612676	-0.372815	0.755236	0.215861	0.665825	0.657459	1.07353	False	False		Ddx4	0.0989504	-0.0128563	0.0236999	0.301711	-0.00104951	0.00266266	False	False
ATP11C_-_138914319.23-ENST00000361648.2|ATP11C_-_138914167.23-ENST00000361648.2	ATP11C	0.656918	0.182489	0.0732812	0.0311109	0.584213	0.233429	-0.239581	0.148674	False	False		Alk	0.940838	0.0264854	-0.0689644	0.00603933	0.348788	0.457438	-0.27386	0.307217	False	False		Ddx54	1.58323	-0.188774	5.56799	0.917553	0.130021	1.00319	False	False
ATP12A_-_25255007.23-P1P2|ATP12A_-_25255017.23-P1P2	ATP12A	0.0187146	1.72782	-1.3728	5.51808	0.933175	0.0300371	-0.0819482	0.00654373	False	False		Alkbh1	0.717562	0.144141	-0.32425	0.154534	0.290818	0.536378	0.290816	0.382537	False	False		Ddx6	0.129338	0.00795777	0.0191748	1.01505	-0.145492	1.24183	False	False
ATP13A1_+_19774468.23-P1P2|ATP13A1_-_19774415.23-P1P2	ATP13A1	0.0416456	1.38043	-0.0236447	0.0759333	0.48994	0.309857	0.154194	0.127016	False	False		Alkbh2	0.0438633	1.3579	-0.540801	2.42807	0.688324	0.162207	0.195115	0.0776146	False	False		Decr1	0.235666	0.018413	0.0808413	0.154781	-0.00122577	0.00159538	False	False
[truncated: 38,757 more rows]

## Sheet: Supplementary_Table_2
Supplementary Table 2. In vivo perturb-seq differential expression analyses.
[truncated: 20,994 more rows]
[truncated: 295 more columns]

## Sheet: Supplementary_Table_3
Supplementary Table 3. Unsupervised gene set analysis from orthogonal nonnegative matrix factorization analysis of in vivo perturb-seq data.
[truncated: 254 more rows]

## Sheet: Supplementary_Table_4
Supplementary Table 4. GBM6 and GBM43 patient-derived intracranial xenograft single-cell RNA sequencing cluster marker genes.
[truncated: 32 more rows]
[truncated: 1 more columns]

[truncated: 4 more sheets: Supplementary_Table_5, Supplementary_Table_6, Supplementary_Table_7, Supplementary_Table_8]
